# Supplementary material for: Identification of Influenza A/H7N9 Virus Infection-Related Human Genes Based on Shortest Paths in a Virus-Human Protein Interaction Network
Source: Biomed Res Int. 2014 May 18;2014:239462. doi: 10.1155/2014/239462 (PMC4052153; doi:10.1155/2014/239462)
Supplement: Supplementary file 1 — Supporting Information S1: Sequences of the 11 non-homologous influenza A/H7N9 virus proteins downloaded from NCBI protein database, with pairwise sequence identity less than 40%. Supporting Information S2: The interacting influenza A/H7N9 virus-human protein pairs with their sharing GO terms. The interacting HRV-human and RSV-human protein pairs were also included respectively. Supporting Information S3: The 3,212 Target Human Proteins interacted with influenza A/H7N9 virus proteins, found based on sharing GO terms. The Target Human Proteins interacted with HRV and RSV viruses were also included respectively. Supporting Information S4: The 962 shortest path human proteins picked out on shortest paths for influenza A/H7N9 virus. The shortest path human proteins for HRV and RSV viruses were also included respectively. Supporting Information S5: Sequences of the 4 non-homologous Human Rhinovirus (HRV) proteins downloaded from NCBI protein database, with pairwise sequence identity less than 40%. Supporting Information S6: Sequences of the 22 non-homologous Respiratory Syncytical Virus (RSV) proteins downloaded from NCBI protein database, with pairwise sequence identity less than 40%. [file 239462.f1.zip]

Archive with 7 entries (6 files):
- Supporting Information/
- Supporting Information/Supporting Information S1.fasta
- Supporting Information/Supporting Information S2.xls
- Supporting Information/Supporting Information S3.xls
- Supporting Information/Supporting Information S4.xls
- Supporting Information/Supporting Information S5.fasta
- Supporting Information/Supporting Information S6.fasta
