# Supplementary material for: Identification of Influenza A/H7N9 Virus Infection-Related Human Genes Based on Shortest Paths in a Virus-Human Protein Interaction Network
Source: Biomed Res Int. 2014 May 18;2014:239462. doi: 10.1155/2014/239462 (PMC4052153; doi:10.1155/2014/239462)
Supplement: Supplementary file 1 — Supporting Information S1: Sequences of the 11 non-homologous influenza A/H7N9 virus proteins downloaded from NCBI protein database, with pairwise sequence identity less than 40%. Supporting Information S2: The interacting influenza A/H7N9 virus-human protein pairs with their sharing GO terms. The interacting HRV-human and RSV-human protein pairs were also included respectively. Supporting Information S3: The 3,212 Target Human Proteins interacted with influenza A/H7N9 virus proteins, found based on sharing GO terms. The Target Human Proteins interacted with HRV and RSV viruses were also included respectively. Supporting Information S4: The 962 shortest path human proteins picked out on shortest paths for influenza A/H7N9 virus. The shortest path human proteins for HRV and RSV viruses were also included respectively. Supporting Information S5: Sequences of the 4 non-homologous Human Rhinovirus (HRV) proteins downloaded from NCBI protein database, with pairwise sequence identity less than 40%. Supporting Information S6: Sequences of the 22 non-homologous Respiratory Syncytical Virus (RSV) proteins downloaded from NCBI protein database, with pairwise sequence identity less than 40%. [file 239462.f1.zip › Supporting Information/Supporting Information S1.fasta]

>gi|66394828|gb|AAY46211.1| hemagglutinin [Influenza A virus (A/Mallard/Sweden/91/02(H7N9))]
MNTQILVFALVAIIPINADKICLGHHAVSNGTKVNTLTERGVEVVNATETVERTNVPRICSRGKRTVDLG
QCGLLGTITGPPQCDQFLEFSADLIIERREGSDVCYPGKFVNEEALRQILRESGGIDKETMGFTYSGIRT
NGAPSACRRSGSSFYAEMKWLLSNTDNAAFPQMTKSYKNTRNDPALIIWGIHHSGSTTEQTKLYGSGNKL
ITVGSSNYQQSFVPSPGARPQVNGQSGRIDFHWLILNPNDTVTFSFNGAFIAPDRASFLRGKSMGIQSGV
QIDANCEGDCYHSGGTIISNLPFQNINSRAVGKCPRYVKQESLLLATGMKNVPEIPKGRGLFGAIAGFIE
NGWEGLIDGWYGFRHQNAQGEGTAADYKSTQSAIDQITGKLNRLIEKTNQQFELIDNEFTEVEKQIGNVI
NWTRDSMTEVWSYNAELLVAMENQHTIDLADSEMNKLYERVRRQLRENAEEDGTGCFEIFHKCDDDCMAS
IRNNTYDHSKYREEAMQNRIQIDPVKLSSGYKDVILWFSFGASCFILLAIAMGLVFMCVKNGNMRCTICI

>gi|68349159|gb|AAY96476.1| matrix protein [Influenza A virus (A/ruddy turnstone/DE/1538/2000(H7N9))]
MSLLTEVETYVLSIVPSGPLKAEIAQRLEDVFAGKNTDLEALMEWLKTRPILSPLTKGILGFVFTLTVPS
ERGLQRRRFVQNALNGNGDPNNMDRAVKLYRKLKREITFHGAKEVALSYSTGALASCMGLIYNRMGTVTT
EVAFGLVCATCEQIADSQHRSHRQMVTTTNPLIRHENRMVLASTTAKAMEQMAGSSEQAAEAMEVASQAR
QMVQAMRTIGTHPSSSAGLKDDLLENLQAYQKRMGVQMQRFK

>gi|68349389|gb|AAY96591.1| nonstructural protein [Influenza A virus (A/ruddy turnstone/DE/1538/2000(H7N9))]
MDSNTVSSFQVDCFLWHVRKRFADQELGDAPFLDRLRRDQKSLRGRGSTLGLDIETATRAGKQIVERILE
EESDEALKMTIASIPASRYLTDMTLEEMSRDWFMLMPKQKVAGSLCIRMDQAIMDKNIILKANFSVIFDR
LETLILLRAFTEEGAIVGEISPLPSLPGHTDEDVKNAIGVLIGGLEWNDNTVRVSETLQRFAWRSCNEDG
RPPLPPKQKRKMARTIESEV

>gi|312126095|gb|ADQ27995.1| nucleocapsid protein [Influenza A virus (A/ruddy turnstone/DE/1538/2000(H7N9))]
MASQGTKRSYEQMETGGERQNATEIRASVGRMVGGIGRFYIQMCTELKLSDYEGRLIQNSITIERMVLSA
FDERRNKYLEEHPSAGKDPKKTGGPIYRRRDGKWMRELILYDKEEIRRIWRQANNGEDATAGLTHLMIWH
SNLNDATYQRTRALVRTGMDPRMCSLMQGSTLPRRSGAAGAAVKGVGTMVMELIRMIKRGINDRNFWRGE
NGRRTRIAYERMCNILKGKFQTAAQRAMMDQVRESRNPGNAEIEDLIFLARSALILRGSVAHKSCLPACV
YGLAVASGYDFEREGYSLVGIDPFRLLQNSQVFSLIRPNENPAHKSQLVWMACHSAAFEDLRVSSFIRGT
RVVPRGQLSTRGVQIASNENMETMDSSTLELRSRYWAIRTRSGGNTNQQRASAGQISVQPTFSVQRNLPF
ERATIMAAFAGNTEGRTSDMRTEIIRMMENARPEDVSFQGRGVFELSDEKATNPIVPSFDMSNEGSYFFG
DNAEDYDN

>gi|312126097|gb|ADQ27996.1| polymerase PA [Influenza A virus (A/ruddy turnstone/DE/1538/2000(H7N9))]
MEDFVRQCFNPMIVELAEKAMKEYGEDPKIETNKFAAICTHLEVCFMYSDFHFIDERGESIIVESGDPNA
LLKHRFEIIEGRDRTMAWTVVNSICNTTGVEKPKFLPDLYDYKENRFIEIGVTRREVHIYYLEKANKIKS
EKTHIHIFSFTGEEMATKADYTLDEESRARIKTRLFTIRQEMASRGLWDSFRQSERGEETIEERFKITGT
MRRLADQSLPPNFSSLENFRAYVDGFEPNGCIEGKLSQMSKEVNARIEPFLKTTPRPLKLPEGPPCSQRS
KFLLMDALKLSIEDPSHEGEGIPLYDAIKCMKTFFGWKEPNIVKPHEKGINPNYLLAWKQVLAELQDIEN
EEKIPKTKNMKKTSQLKWALGENMAPEKVDFEDCKDVSDLRQYDSDEPEQRSLASWIQSEFNKACELTDS
SWIELDEIGEDVAPIEHIASMRRNYFTAEVSHCRATEYIMKGVYINTALLNASCAAMDDFQLIPMISKCR
TKEGRRKTNLYGFIIKGRSHLRNDTDVVNFVSMEFSLTDPRLEPHKWEKYCVLEIGDMLLRTAIGQVSRP
MFLYVRTNGTSKIKMKWGMEMRRCLLQSLQQIESMIEAESSVKEKDMTKEFFENKSETWPIGESPKGVEE
GSIGKVCRTLLAKSVFNSLYASPQLEGFSAESRKLLLIVQALRDNLEPGTFDLGGLYEAIEECLINDPWV
LLNASWFNSFLTHALK

>gi|312126100|gb|ADQ27998.1| PB1-F2 protein [Influenza A virus (A/ruddy turnstone/DE/1538/2000(H7N9))]
MEQEQDTPWTQLTEHINIQKRGNGQQIQKLEHPNLTQLMDRCLRTMSQVDMHKRTVSLKQWLSLKSPTQE
SLKTRVLKRWKLSNKQEWTN

>gi|312126102|gb|ADQ27999.1| polymerase PB2 [Influenza A virus (A/ruddy turnstone/DE/1538/2000(H7N9))]
MERIKELRDLMSQSRTREILTKTTVDHMAIIKKYTSGRQEKNPALRMKWMMAMKYPITADKRIMEMIPER
NEQGQTLWSKTNDAGSDRVMVSPLAVTWWNRNGPTTSTVHYPKVYKTYFEKVERLKHGTFGPVHFRNQVK
IRRRVDINPGHADLSAKEAQDVIMEVVFPNEVGARILTSESQLTITKEKKEELQDCKIAPLMVAYMLERE
LVRKTRFLPVAGGTSSVYIEVLHLTQGTCWEQMYTPGGEVRNDDVDQSLIIAARNIVRRATVSADPLASL
LEMCHSTQIGGIRMVDILRQNPTEEQAVDICKAAMGLRVSSSFSFGGFTFKRTSGSSVKREEEVLTGNLQ
TLKIRVHEGYEEFTMVGRRATAILRKATRRLIQLIVSGRDEQSIAEAIIVAMVFSQEDCMIKAVRGDLNF
VNRANQRLNPMHQLLRHFQKDAKVLFQNWGIEPIDNVMGMIGILPDMTPSTDMSLRGIRVSKMGVDEYSS
TERVVVSIDRFLRVRDQRGNVLLSPEEVSETQGIEKLTITYSSSMMWEINGPESVLVNTYQWIIRNWETV
KIQWSQDPTMLYNKMEFEPFQSLVPKAARGQYSGFVRTLFQQMRDVLGTFDTVQIIKLLPFAAAPPEQSR
MQFSSLTVNVRGSGMRILVRGNSPVFNYNKATKRLTILGKDAGALTEDPDEGTAGVESAVLRGFLILGKE
DKRYGPALSINELSNLAKGEKANVLIGQGDVVLVMKRKRDSSILTDSQTATKRIRMAIN

>gi|115278576|gb|ABI84696.1| matrix protein 2 [Influenza A virus (A/turkey/Minnesota/1/1988(H7N9))]
MSLLTEVETPTRNGWECKCSDSSDPLVIAASIIGILHLILWILDRLFFKCIYRRLKYGLKRGPSTEGVPE
SMREEYRQEQQSAVDVDDGHFVNIELE

>gi|115278578|gb|ABI84697.1| neuraminidase [Influenza A virus (A/turkey/Minnesota/1/1988(H7N9))]
MNPNQKILCTSATAIVIGTIAVLIGIANLGLNIGLHLKPNCNCSHSQPEATNASQTIINNYYNETNITQI
SNTNIQMEEKASREFNNLTKGLCTINSWHIYGKDNAVRIGEDSDVLVTREPYVSCDPDECRFYALSQGTT
IRGKHSNGTIHDRSQYRALISWPLSSPPTVYNSRVECIGWSSTSCHDGRARMSICISGPNNNASAVIWYN
RRPVTEINTWARNILRTQESECVCHNGVCPVVFTDGSATGPAETRVYYFKEGKILKWEPLTGTAKHIEEC
SCYGEQAGITCTCRDNWQGSNRPVIQIDPVAMTHTSQYICSPVLTDNPRPNDPTVGKCNDPYPGNNNNGV
KGFSYLDGGNTWLGRTINTASRSGYEMLKVPNALTDDRSKPTQGQTIVLNTDWSGYSGSFMDYWAEGECY
RACFYVELIRGRPKEDKVWWTSNSIVSMCSSTEFLGQWNWPDGAKIEYFL

>gi|115278583|gb|ABI84700.1| nonstructural protein 2 [Influenza A virus (A/turkey/Minnesota/1/1988(H7N9))]
MDSNTVSSFQDILMRMSKMQLGSSSEDLNGMITQFESLKLYRDSLGEAVMRMGDLHSLQSRNGKWREQLS
QKFEEIRWLIEEVRHRLKITENSFEQITFMQALQLLLEVEQEIRTFSFQLI

>gi|307141883|gb|ADN34735.1| polymerase PB1 [Influenza A virus (A/Anas crecca/Spain/1460/2008(H7N9))]
MDVNPTLLFLKVPAQNAISTTFPYTGDPPYSHGTGTGYTMDTVNRTHQYSEKGKWTTNTETGAPQLNPID
GPLPEDNEPSGYAQTDCVLEAMAFLEESHPGIFENSCLETMEVVQQTRVDKLTQGRQTYDWTLNRNQPAA
TALANTIEVFRSNGLTANESGRLIDFLKDVMESMDKEEMEITTHFQRKRRVRDNMTKKMVTQRTIGKKKQ
RLNKRNYLIRALTLNTMTKDAERGKLKRRAIATPGMQIRGFVYFVETLARSICEKLEQSGLPVGGNEKKA
KLANVVRKMMTNSQDTELSFTITGDNTKWNENQNPRMFLAMITYITRNQPEWFRNVLSIAPIMFSNKMAR
LGKGYMFESKSMKLRTQIPAEMLANIDLKYFNESTRKKIEKIRPLLIDGTASLSPGMMMGMFNMLSTVLG
VSILNLGQKRYTKTTYWWDGLQSSDDFALIVNAPNHEGIQAGVDRFYRTCKLVGINMSKKKSYINRTGTF
EFTSFFYRYGFVANFSMELPSFGVSGINESADMSIGVTVIKNNMINNDLGPATAQMALQLFIKDYRYTYR
CHRGDTQIQTRRSFELKKLWEQTRSKAGLLVSDGGPNLYNIRNLHIPEVCLKWELMDEDYQGRLCNPLNP
FVSHKEIESVNNAVVMPAHGPAKSMEYDAVATTHSWIPKRNRSILNTSQRGILEDEQMYQKCCNLFEKFF
PSSSYRRPVGISSMVEAMVSRARIDARIDFESGRIKKEEFAEIMKICSTIEELRRQKQ
