# Supplementary material for: Identification of Influenza A/H7N9 Virus Infection-Related Human Genes Based on Shortest Paths in a Virus-Human Protein Interaction Network
Source: Biomed Res Int. 2014 May 18;2014:239462. doi: 10.1155/2014/239462 (PMC4052153; doi:10.1155/2014/239462)
Supplement: Supplementary file 1 — Supporting Information S1: Sequences of the 11 non-homologous influenza A/H7N9 virus proteins downloaded from NCBI protein database, with pairwise sequence identity less than 40%. Supporting Information S2: The interacting influenza A/H7N9 virus-human protein pairs with their sharing GO terms. The interacting HRV-human and RSV-human protein pairs were also included respectively. Supporting Information S3: The 3,212 Target Human Proteins interacted with influenza A/H7N9 virus proteins, found based on sharing GO terms. The Target Human Proteins interacted with HRV and RSV viruses were also included respectively. Supporting Information S4: The 962 shortest path human proteins picked out on shortest paths for influenza A/H7N9 virus. The shortest path human proteins for HRV and RSV viruses were also included respectively. Supporting Information S5: Sequences of the 4 non-homologous Human Rhinovirus (HRV) proteins downloaded from NCBI protein database, with pairwise sequence identity less than 40%. Supporting Information S6: Sequences of the 22 non-homologous Respiratory Syncytical Virus (RSV) proteins downloaded from NCBI protein database, with pairwise sequence identity less than 40%. [file 239462.f1.zip › Supporting Information/Supporting Information S2.xls]

## Sheet: H7N9-Human Protein pairs
Influenza A/H7N9 virus proteins	Human proteins|Genes	Number of sharing GO terms	Sharing GO terms
H7N9|>gi|66394828|gb|AAY46211.1| hemagglutinin [Influenza A virus (A/Mallard/Sweden/91/02(H7N9))]	ENSP00000414236|HSBP1L1	3	GO:0019064|viral entry into host cell via membrane fusion with the plasma membrane; GO:0019031|viral envelope; GO:0046789|host cell surface receptor binding
H7N9|>gi|115278576|gb|ABI84696.1| matrix protein 2 [Influenza A virus (A/turkey/Minnesota/1/1988(H7N9))]	ENSP00000234396|ATP6V1B1	2	GO:0015992|proton transport; GO:0015078|hydrogen ion transmembrane transporter activity
H7N9|>gi|115278576|gb|ABI84696.1| matrix protein 2 [Influenza A virus (A/turkey/Minnesota/1/1988(H7N9))]	ENSP00000236067|ATP6V0B	2	GO:0015992|proton transport; GO:0015078|hydrogen ion transmembrane transporter activity
H7N9|>gi|115278576|gb|ABI84696.1| matrix protein 2 [Influenza A virus (A/turkey/Minnesota/1/1988(H7N9))]	ENSP00000243389|SLC36A1	2	GO:0015992|proton transport; GO:0015078|hydrogen ion transmembrane transporter activity
H7N9|>gi|115278576|gb|ABI84696.1| matrix protein 2 [Influenza A virus (A/turkey/Minnesota/1/1988(H7N9))]	ENSP00000245448|ATP5S	2	GO:0015992|proton transport; GO:0015078|hydrogen ion transmembrane transporter activity
H7N9|>gi|115278576|gb|ABI84696.1| matrix protein 2 [Influenza A virus (A/turkey/Minnesota/1/1988(H7N9))]	ENSP00000249289|ATP6V1F	2	GO:0015992|proton transport; GO:0015078|hydrogen ion transmembrane transporter activity
H7N9|>gi|115278576|gb|ABI84696.1| matrix protein 2 [Influenza A virus (A/turkey/Minnesota/1/1988(H7N9))]	ENSP00000253856|ATP6V0A4	2	GO:0015992|proton transport; GO:0015078|hydrogen ion transmembrane transporter activity
H7N9|>gi|115278576|gb|ABI84696.1| matrix protein 2 [Influenza A virus (A/turkey/Minnesota/1/1988(H7N9))]	ENSP00000262051|SLC11A2	2	GO:0015992|proton transport; GO:0015078|hydrogen ion transmembrane transporter activity
H7N9|>gi|115278576|gb|ABI84696.1| matrix protein 2 [Influenza A virus (A/turkey/Minnesota/1/1988(H7N9))]	ENSP00000262052|SLC11A2	2	GO:0015992|proton transport; GO:0015078|hydrogen ion transmembrane transporter activity
H7N9|>gi|115278576|gb|ABI84696.1| matrix protein 2 [Influenza A virus (A/turkey/Minnesota/1/1988(H7N9))]	ENSP00000265093|ATP6V0E1	2	GO:0015992|proton transport; GO:0015078|hydrogen ion transmembrane transporter activity
H7N9|>gi|115278576|gb|ABI84696.1| matrix protein 2 [Influenza A virus (A/turkey/Minnesota/1/1988(H7N9))]	ENSP00000265686|TCIRG1	2	GO:0015992|proton transport; GO:0015078|hydrogen ion transmembrane transporter activity
H7N9|>gi|115278576|gb|ABI84696.1| matrix protein 2 [Influenza A virus (A/turkey/Minnesota/1/1988(H7N9))]	ENSP00000276390|ATP6V1B2	2	GO:0015992|proton transport; GO:0015078|hydrogen ion transmembrane transporter activity
H7N9|>gi|115278576|gb|ABI84696.1| matrix protein 2 [Influenza A virus (A/turkey/Minnesota/1/1988(H7N9))]	ENSP00000290949|ATP6V0D1	2	GO:0015992|proton transport; GO:0015078|hydrogen ion transmembrane transporter activity
H7N9|>gi|115278576|gb|ABI84696.1| matrix protein 2 [Influenza A virus (A/turkey/Minnesota/1/1988(H7N9))]	ENSP00000308122|ATP6V0A4	2	GO:0015992|proton transport; GO:0015078|hydrogen ion transmembrane transporter activity
H7N9|>gi|115278576|gb|ABI84696.1| matrix protein 2 [Influenza A virus (A/turkey/Minnesota/1/1988(H7N9))]	ENSP00000308334|ATP5S	2	GO:0015992|proton transport; GO:0015078|hydrogen ion transmembrane transporter activity
H7N9|>gi|115278576|gb|ABI84696.1| matrix protein 2 [Influenza A virus (A/turkey/Minnesota/1/1988(H7N9))]	ENSP00000329757|ATP6V0C	2	GO:0015992|proton transport; GO:0015078|hydrogen ion transmembrane transporter activity
H7N9|>gi|115278576|gb|ABI84696.1| matrix protein 2 [Influenza A virus (A/turkey/Minnesota/1/1988(H7N9))]	ENSP00000376774|ATP6V0A4	2	GO:0015992|proton transport; GO:0015078|hydrogen ion transmembrane transporter activity
H7N9|>gi|115278576|gb|ABI84696.1| matrix protein 2 [Influenza A virus (A/turkey/Minnesota/1/1988(H7N9))]	ENSP00000378364|SLC11A2	2	GO:0015992|proton transport; GO:0015078|hydrogen ion transmembrane transporter activity
H7N9|>gi|115278576|gb|ABI84696.1| matrix protein 2 [Influenza A virus (A/turkey/Minnesota/1/1988(H7N9))]	ENSP00000388353|ATP6V1B1	2	GO:0015992|proton transport; GO:0015078|hydrogen ion transmembrane transporter activity
H7N9|>gi|115278576|gb|ABI84696.1| matrix protein 2 [Influenza A virus (A/turkey/Minnesota/1/1988(H7N9))]	ENSP00000389246|ATP5S	2	GO:0015992|proton transport; GO:0015078|hydrogen ion transmembrane transporter activity
H7N9|>gi|115278576|gb|ABI84696.1| matrix protein 2 [Influenza A virus (A/turkey/Minnesota/1/1988(H7N9))]	ENSP00000405114|ATP6V1B1	2	GO:0015992|proton transport; GO:0015078|hydrogen ion transmembrane transporter activity
H7N9|>gi|115278576|gb|ABI84696.1| matrix protein 2 [Influenza A virus (A/turkey/Minnesota/1/1988(H7N9))]	ENSP00000408361|ATP6V1B1	2	GO:0015992|proton transport; GO:0015078|hydrogen ion transmembrane transporter activity
H7N9|>gi|115278576|gb|ABI84696.1| matrix protein 2 [Influenza A virus (A/turkey/Minnesota/1/1988(H7N9))]	ENSP00000427941|ATP6V0E1	2	GO:0015992|proton transport; GO:0015078|hydrogen ion transmembrane transporter activity
H7N9|>gi|115278576|gb|ABI84696.1| matrix protein 2 [Influenza A virus (A/turkey/Minnesota/1/1988(H7N9))]	ENSP00000429690|ATP6V0E1	2	GO:0015992|proton transport; GO:0015078|hydrogen ion transmembrane transporter activity
H7N9|>gi|115278576|gb|ABI84696.1| matrix protein 2 [Influenza A virus (A/turkey/Minnesota/1/1988(H7N9))]	ENSP00000431605|ATP6V0B	2	GO:0015992|proton transport; GO:0015078|hydrogen ion transmembrane transporter activity
H7N9|>gi|115278576|gb|ABI84696.1| matrix protein 2 [Influenza A virus (A/turkey/Minnesota/1/1988(H7N9))]	ENSP00000434407|TCIRG1	2	GO:0015992|proton transport; GO:0015078|hydrogen ion transmembrane transporter activity
H7N9|>gi|115278576|gb|ABI84696.1| matrix protein 2 [Influenza A virus (A/turkey/Minnesota/1/1988(H7N9))]	ENSP00000444542|SLC11A2	2	GO:0015992|proton transport; GO:0015078|hydrogen ion transmembrane transporter activity
H7N9|>gi|115278576|gb|ABI84696.1| matrix protein 2 [Influenza A virus (A/turkey/Minnesota/1/1988(H7N9))]	ENSP00000446769|SLC11A2	2	GO:0015992|proton transport; GO:0015078|hydrogen ion transmembrane transporter activity
H7N9|>gi|115278576|gb|ABI84696.1| matrix protein 2 [Influenza A virus (A/turkey/Minnesota/1/1988(H7N9))]	ENSP00000449008|SLC11A2	2	GO:0015992|proton transport; GO:0015078|hydrogen ion transmembrane transporter activity
H7N9|>gi|115278576|gb|ABI84696.1| matrix protein 2 [Influenza A virus (A/turkey/Minnesota/1/1988(H7N9))]	ENSP00000449200|SLC11A2	2	GO:0015992|proton transport; GO:0015078|hydrogen ion transmembrane transporter activity
H7N9|>gi|115278576|gb|ABI84696.1| matrix protein 2 [Influenza A virus (A/turkey/Minnesota/1/1988(H7N9))]	ENSP00000454796|ATP6V0C	2	GO:0015992|proton transport; GO:0015078|hydrogen ion transmembrane transporter activity
H7N9|>gi|115278576|gb|ABI84696.1| matrix protein 2 [Influenza A virus (A/turkey/Minnesota/1/1988(H7N9))]	ENSP00000217885|NOX1	1	GO:0015992|proton transport
H7N9|>gi|115278576|gb|ABI84696.1| matrix protein 2 [Influenza A virus (A/turkey/Minnesota/1/1988(H7N9))]	ENSP00000242607|HVCN1	1	GO:0015992|proton transport
H7N9|>gi|115278576|gb|ABI84696.1| matrix protein 2 [Influenza A virus (A/turkey/Minnesota/1/1988(H7N9))]	ENSP00000253413|ATP6V1E1	1	GO:0015992|proton transport
H7N9|>gi|115278576|gb|ABI84696.1| matrix protein 2 [Influenza A virus (A/turkey/Minnesota/1/1988(H7N9))]	ENSP00000262030|ATP5B	1	GO:0015992|proton transport
H7N9|>gi|115278576|gb|ABI84696.1| matrix protein 2 [Influenza A virus (A/turkey/Minnesota/1/1988(H7N9))]	ENSP00000262999|UCP1	1	GO:0015992|proton transport
H7N9|>gi|115278576|gb|ABI84696.1| matrix protein 2 [Influenza A virus (A/turkey/Minnesota/1/1988(H7N9))]	ENSP00000264649|ATP6V0A1	1	GO:0015078|hydrogen ion transmembrane transporter activity
H7N9|>gi|115278576|gb|ABI84696.1| matrix protein 2 [Influenza A virus (A/turkey/Minnesota/1/1988(H7N9))]	ENSP00000264663|NNT	1	GO:0015992|proton transport
H7N9|>gi|115278576|gb|ABI84696.1| matrix protein 2 [Influenza A virus (A/turkey/Minnesota/1/1988(H7N9))]	ENSP00000273398|ATP6V1A	1	GO:0015992|proton transport
H7N9|>gi|115278576|gb|ABI84696.1| matrix protein 2 [Influenza A virus (A/turkey/Minnesota/1/1988(H7N9))]	ENSP00000281087|ATP6V1G3	1	GO:0015992|proton transport
H7N9|>gi|115278576|gb|ABI84696.1| matrix protein 2 [Influenza A virus (A/turkey/Minnesota/1/1988(H7N9))]	ENSP00000282050|ATP5A1	1	GO:0015992|proton transport
H7N9|>gi|115278576|gb|ABI84696.1| matrix protein 2 [Influenza A virus (A/turkey/Minnesota/1/1988(H7N9))]	ENSP00000284727|ATP5G3	1	GO:0015078|hydrogen ion transmembrane transporter activity
H7N9|>gi|115278576|gb|ABI84696.1| matrix protein 2 [Influenza A virus (A/turkey/Minnesota/1/1988(H7N9))]	ENSP00000284971|ATP5J	1	GO:0015078|hydrogen ion transmembrane transporter activity
H7N9|>gi|115278576|gb|ABI84696.1| matrix protein 2 [Influenza A virus (A/turkey/Minnesota/1/1988(H7N9))]	ENSP00000285393|ATP6V0D2	1	GO:0015078|hydrogen ion transmembrane transporter activity
H7N9|>gi|115278576|gb|ABI84696.1| matrix protein 2 [Influenza A virus (A/turkey/Minnesota/1/1988(H7N9))]	ENSP00000290299|ATP5O	1	GO:0015992|proton transport
H7N9|>gi|115278576|gb|ABI84696.1| matrix protein 2 [Influenza A virus (A/turkey/Minnesota/1/1988(H7N9))]	ENSP00000292475|ATP5J2	1	GO:0015992|proton transport
H7N9|>gi|115278576|gb|ABI84696.1| matrix protein 2 [Influenza A virus (A/turkey/Minnesota/1/1988(H7N9))]	ENSP00000300688|ATP5L	1	GO:0015078|hydrogen ion transmembrane transporter activity
H7N9|>gi|115278576|gb|ABI84696.1| matrix protein 2 [Influenza A virus (A/turkey/Minnesota/1/1988(H7N9))]	ENSP00000301587|ATP5H	1	GO:0015078|hydrogen ion transmembrane transporter activity
H7N9|>gi|115278576|gb|ABI84696.1| matrix protein 2 [Influenza A virus (A/turkey/Minnesota/1/1988(H7N9))]	ENSP00000302194|ATP6V1G2	1	GO:0015992|proton transport
H7N9|>gi|115278576|gb|ABI84696.1| matrix protein 2 [Influenza A virus (A/turkey/Minnesota/1/1988(H7N9))]	ENSP00000306003|ATP5I	1	GO:0015078|hydrogen ion transmembrane transporter activity
H7N9|>gi|115278576|gb|ABI84696.1| matrix protein 2 [Influenza A virus (A/turkey/Minnesota/1/1988(H7N9))]	ENSP00000309574|ATP6V1G3	1	GO:0015992|proton transport
H7N9|>gi|115278576|gb|ABI84696.1| matrix protein 2 [Influenza A virus (A/turkey/Minnesota/1/1988(H7N9))]	ENSP00000312029|UCP2	1	GO:0015992|proton transport
H7N9|>gi|115278576|gb|ABI84696.1| matrix protein 2 [Influenza A virus (A/turkey/Minnesota/1/1988(H7N9))]	ENSP00000323740|UCP3	1	GO:0015992|proton transport
H7N9|>gi|115278576|gb|ABI84696.1| matrix protein 2 [Influenza A virus (A/turkey/Minnesota/1/1988(H7N9))]	ENSP00000332247|ATP6V0A2	1	GO:0015078|hydrogen ion transmembrane transporter activity
H7N9|>gi|115278576|gb|ABI84696.1| matrix protein 2 [Influenza A virus (A/turkey/Minnesota/1/1988(H7N9))]	ENSP00000334223|SLC36A2	1	GO:0015992|proton transport
H7N9|>gi|115278576|gb|ABI84696.1| matrix protein 2 [Influenza A virus (A/turkey/Minnesota/1/1988(H7N9))]	ENSP00000340315|ATP5G2	1	GO:0015078|hydrogen ion transmembrane transporter activity
H7N9|>gi|115278576|gb|ABI84696.1| matrix protein 2 [Influenza A virus (A/turkey/Minnesota/1/1988(H7N9))]	ENSP00000342951|ATP6V0A1	1	GO:0015078|hydrogen ion transmembrane transporter activity
H7N9|>gi|115278576|gb|ABI84696.1| matrix protein 2 [Influenza A virus (A/turkey/Minnesota/1/1988(H7N9))]	ENSP00000343873|NNT	1	GO:0015992|proton transport
H7N9|>gi|115278576|gb|ABI84696.1| matrix protein 2 [Influenza A virus (A/turkey/Minnesota/1/1988(H7N9))]	ENSP00000344230|ATP5H	1	GO:0015078|hydrogen ion transmembrane transporter activity
H7N9|>gi|115278576|gb|ABI84696.1| matrix protein 2 [Influenza A virus (A/turkey/Minnesota/1/1988(H7N9))]	ENSP00000348205|ATP5G1	1	GO:0015078|hydrogen ion transmembrane transporter activity
H7N9|>gi|115278576|gb|ABI84696.1| matrix protein 2 [Influenza A virus (A/turkey/Minnesota/1/1988(H7N9))]	ENSP00000349181|HVCN1	1	GO:0015992|proton transport
H7N9|>gi|115278576|gb|ABI84696.1| matrix protein 2 [Influenza A virus (A/turkey/Minnesota/1/1988(H7N9))]	ENSP00000354632|MT-ATP6	1	GO:0015078|hydrogen ion transmembrane transporter activity
H7N9|>gi|115278576|gb|ABI84696.1| matrix protein 2 [Influenza A virus (A/turkey/Minnesota/1/1988(H7N9))]	ENSP00000355265|J01415.25	1	GO:0015078|hydrogen ion transmembrane transporter activity
H7N9|>gi|115278576|gb|ABI84696.1| matrix protein 2 [Influenza A virus (A/turkey/Minnesota/1/1988(H7N9))]	ENSP00000356351|ATP6V1G3	1	GO:0015992|proton transport
H7N9|>gi|115278576|gb|ABI84696.1| matrix protein 2 [Influenza A virus (A/turkey/Minnesota/1/1988(H7N9))]	ENSP00000356352|ATP6V1G3	1	GO:0015992|proton transport
H7N9|>gi|115278576|gb|ABI84696.1| matrix protein 2 [Influenza A virus (A/turkey/Minnesota/1/1988(H7N9))]	ENSP00000358737|ATP5F1	1	GO:0015078|hydrogen ion transmembrane transporter activity
H7N9|>gi|115278576|gb|ABI84696.1| matrix protein 2 [Influenza A virus (A/turkey/Minnesota/1/1988(H7N9))]	ENSP00000358777|ATP6AP1	1	GO:0015992|proton transport
H7N9|>gi|115278576|gb|ABI84696.1| matrix protein 2 [Influenza A virus (A/turkey/Minnesota/1/1988(H7N9))]	ENSP00000362057|NOX1	1	GO:0015992|proton transport
H7N9|>gi|115278576|gb|ABI84696.1| matrix protein 2 [Influenza A virus (A/turkey/Minnesota/1/1988(H7N9))]	ENSP00000363162|ATP6V1G1	1	GO:0015992|proton transport
H7N9|>gi|115278576|gb|ABI84696.1| matrix protein 2 [Influenza A virus (A/turkey/Minnesota/1/1988(H7N9))]	ENSP00000365321|ATP6V1G2	1	GO:0015992|proton transport
H7N9|>gi|115278576|gb|ABI84696.1| matrix protein 2 [Influenza A virus (A/turkey/Minnesota/1/1988(H7N9))]	ENSP00000365356|ATP6V1G2-DDX39B	1	GO:0015992|proton transport
H7N9|>gi|115278576|gb|ABI84696.1| matrix protein 2 [Influenza A virus (A/turkey/Minnesota/1/1988(H7N9))]	ENSP00000369396|SLC4A11	1	GO:0015992|proton transport
H7N9|>gi|115278576|gb|ABI84696.1| matrix protein 2 [Influenza A virus (A/turkey/Minnesota/1/1988(H7N9))]	ENSP00000369399|SLC4A11	1	GO:0015992|proton transport
H7N9|>gi|115278576|gb|ABI84696.1| matrix protein 2 [Influenza A virus (A/turkey/Minnesota/1/1988(H7N9))]	ENSP00000372995|ATP6V1G2	1	GO:0015992|proton transport
H7N9|>gi|115278576|gb|ABI84696.1| matrix protein 2 [Influenza A virus (A/turkey/Minnesota/1/1988(H7N9))]	ENSP00000373518|NOX5	1	GO:0015992|proton transport
H7N9|>gi|115278576|gb|ABI84696.1| matrix protein 2 [Influenza A virus (A/turkey/Minnesota/1/1988(H7N9))]	ENSP00000376324|ATP5G3	1	GO:0015078|hydrogen ion transmembrane transporter activity
H7N9|>gi|115278576|gb|ABI84696.1| matrix protein 2 [Influenza A virus (A/turkey/Minnesota/1/1988(H7N9))]	ENSP00000377033|ATP5G1	1	GO:0015078|hydrogen ion transmembrane transporter activity
H7N9|>gi|115278576|gb|ABI84696.1| matrix protein 2 [Influenza A virus (A/turkey/Minnesota/1/1988(H7N9))]	ENSP00000377415|ATP6V0A1	1	GO:0015078|hydrogen ion transmembrane transporter activity
H7N9|>gi|115278576|gb|ABI84696.1| matrix protein 2 [Influenza A virus (A/turkey/Minnesota/1/1988(H7N9))]	ENSP00000377740|ATP5J2	1	GO:0015992|proton transport
H7N9|>gi|115278576|gb|ABI84696.1| matrix protein 2 [Influenza A virus (A/turkey/Minnesota/1/1988(H7N9))]	ENSP00000377878|ATP5G2	1	GO:0015078|hydrogen ion transmembrane transporter activity
H7N9|>gi|115278576|gb|ABI84696.1| matrix protein 2 [Influenza A virus (A/turkey/Minnesota/1/1988(H7N9))]	ENSP00000379203|ATP6V1C1	1	GO:0015992|proton transport
H7N9|>gi|115278576|gb|ABI84696.1| matrix protein 2 [Influenza A virus (A/turkey/Minnesota/1/1988(H7N9))]	ENSP00000381736|ATP5A1	1	GO:0015992|proton transport
H7N9|>gi|115278576|gb|ABI84696.1| matrix protein 2 [Influenza A virus (A/turkey/Minnesota/1/1988(H7N9))]	ENSP00000382696|ATP6V1E1	1	GO:0015992|proton transport
H7N9|>gi|115278576|gb|ABI84696.1| matrix protein 2 [Influenza A virus (A/turkey/Minnesota/1/1988(H7N9))]	ENSP00000382959|ATP5J	1	GO:0015078|hydrogen ion transmembrane transporter activity
H7N9|>gi|115278576|gb|ABI84696.1| matrix protein 2 [Influenza A virus (A/turkey/Minnesota/1/1988(H7N9))]	ENSP00000382962|ATP5J	1	GO:0015078|hydrogen ion transmembrane transporter activity
H7N9|>gi|115278576|gb|ABI84696.1| matrix protein 2 [Influenza A virus (A/turkey/Minnesota/1/1988(H7N9))]	ENSP00000382965|ATP5J	1	GO:0015078|hydrogen ion transmembrane transporter activity
H7N9|>gi|115278576|gb|ABI84696.1| matrix protein 2 [Influenza A virus (A/turkey/Minnesota/1/1988(H7N9))]	ENSP00000382966|ATP5J	1	GO:0015078|hydrogen ion transmembrane transporter activity
H7N9|>gi|115278576|gb|ABI84696.1| matrix protein 2 [Influenza A virus (A/turkey/Minnesota/1/1988(H7N9))]	ENSP00000382971|ATP5J	1	GO:0015078|hydrogen ion transmembrane transporter activity
H7N9|>gi|115278576|gb|ABI84696.1| matrix protein 2 [Influenza A virus (A/turkey/Minnesota/1/1988(H7N9))]	ENSP00000387317|ATP5G3	1	GO:0015078|hydrogen ion transmembrane transporter activity
H7N9|>gi|115278576|gb|ABI84696.1| matrix protein 2 [Influenza A virus (A/turkey/Minnesota/1/1988(H7N9))]	ENSP00000387599|ATP6V1B1	1	GO:0015078|hydrogen ion transmembrane transporter activity
H7N9|>gi|115278576|gb|ABI84696.1| matrix protein 2 [Influenza A virus (A/turkey/Minnesota/1/1988(H7N9))]	ENSP00000389649|ATP5J	1	GO:0015078|hydrogen ion transmembrane transporter activity
H7N9|>gi|115278576|gb|ABI84696.1| matrix protein 2 [Influenza A virus (A/turkey/Minnesota/1/1988(H7N9))]	ENSP00000390148|ATP6V1G2	1	GO:0015992|proton transport
H7N9|>gi|115278576|gb|ABI84696.1| matrix protein 2 [Influenza A virus (A/turkey/Minnesota/1/1988(H7N9))]	ENSP00000392143|UCP3	1	GO:0015992|proton transport
H7N9|>gi|115278576|gb|ABI84696.1| matrix protein 2 [Influenza A virus (A/turkey/Minnesota/1/1988(H7N9))]	ENSP00000393910|ATP6V0D1	1	GO:0015078|hydrogen ion transmembrane transporter activity
H7N9|>gi|115278576|gb|ABI84696.1| matrix protein 2 [Influenza A virus (A/turkey/Minnesota/1/1988(H7N9))]	ENSP00000395436|ATP6V1G2	1	GO:0015992|proton transport
H7N9|>gi|115278576|gb|ABI84696.1| matrix protein 2 [Influenza A virus (A/turkey/Minnesota/1/1988(H7N9))]	ENSP00000395640|SLC36A1	1	GO:0015078|hydrogen ion transmembrane transporter activity
H7N9|>gi|115278576|gb|ABI84696.1| matrix protein 2 [Influenza A virus (A/turkey/Minnesota/1/1988(H7N9))]	ENSP00000396148|ATP6V0E2	1	GO:0015078|hydrogen ion transmembrane transporter activity
H7N9|>gi|115278576|gb|ABI84696.1| matrix protein 2 [Influenza A virus (A/turkey/Minnesota/1/1988(H7N9))]	ENSP00000402430|ATP6V1G2	1	GO:0015992|proton transport
H7N9|>gi|115278576|gb|ABI84696.1| matrix protein 2 [Influenza A virus (A/turkey/Minnesota/1/1988(H7N9))]	ENSP00000403158|ATP6V1G2	1	GO:0015992|proton transport
H7N9|>gi|115278576|gb|ABI84696.1| matrix protein 2 [Influenza A virus (A/turkey/Minnesota/1/1988(H7N9))]	ENSP00000404271|SLC4A11	1	GO:0015992|proton transport
H7N9|>gi|115278576|gb|ABI84696.1| matrix protein 2 [Influenza A virus (A/turkey/Minnesota/1/1988(H7N9))]	ENSP00000406372|ATP6V1G2	1	GO:0015992|proton transport
H7N9|>gi|115278576|gb|ABI84696.1| matrix protein 2 [Influenza A virus (A/turkey/Minnesota/1/1988(H7N9))]	ENSP00000406389|ATP6V1G2	1	GO:0015992|proton transport
H7N9|>gi|115278576|gb|ABI84696.1| matrix protein 2 [Influenza A virus (A/turkey/Minnesota/1/1988(H7N9))]	ENSP00000406575|ATP6V1G2	1	GO:0015992|proton transport
H7N9|>gi|115278576|gb|ABI84696.1| matrix protein 2 [Influenza A virus (A/turkey/Minnesota/1/1988(H7N9))]	ENSP00000406668|ATP6V1G2	1	GO:0015992|proton transport
H7N9|>gi|115278576|gb|ABI84696.1| matrix protein 2 [Influenza A virus (A/turkey/Minnesota/1/1988(H7N9))]	ENSP00000407840|ATP6V1B1	1	GO:0015078|hydrogen ion transmembrane transporter activity
H7N9|>gi|115278576|gb|ABI84696.1| matrix protein 2 [Influenza A virus (A/turkey/Minnesota/1/1988(H7N9))]	ENSP00000408670|ATP6V1G2	1	GO:0015992|proton transport
H7N9|>gi|115278576|gb|ABI84696.1| matrix protein 2 [Influenza A virus (A/turkey/Minnesota/1/1988(H7N9))]	ENSP00000409104|ATP6V1G2	1	GO:0015992|proton transport
H7N9|>gi|115278576|gb|ABI84696.1| matrix protein 2 [Influenza A virus (A/turkey/Minnesota/1/1988(H7N9))]	ENSP00000410220|ATP6V0E2	1	GO:0015078|hydrogen ion transmembrane transporter activity
H7N9|>gi|115278576|gb|ABI84696.1| matrix protein 2 [Influenza A virus (A/turkey/Minnesota/1/1988(H7N9))]	ENSP00000411672|ATP6V0E2	1	GO:0015078|hydrogen ion transmembrane transporter activity
H7N9|>gi|115278576|gb|ABI84696.1| matrix protein 2 [Influenza A virus (A/turkey/Minnesota/1/1988(H7N9))]	ENSP00000413222|ATP6V1G2	1	GO:0015992|proton transport
H7N9|>gi|115278576|gb|ABI84696.1| matrix protein 2 [Influenza A virus (A/turkey/Minnesota/1/1988(H7N9))]	ENSP00000416031|ATP6V1G2	1	GO:0015992|proton transport
H7N9|>gi|115278576|gb|ABI84696.1| matrix protein 2 [Influenza A virus (A/turkey/Minnesota/1/1988(H7N9))]	ENSP00000417171|ATP6V1G3	1	GO:0015992|proton transport
H7N9|>gi|115278576|gb|ABI84696.1| matrix protein 2 [Influenza A virus (A/turkey/Minnesota/1/1988(H7N9))]	ENSP00000417545|ATP6V1A	1	GO:0015992|proton transport
H7N9|>gi|115278576|gb|ABI84696.1| matrix protein 2 [Influenza A virus (A/turkey/Minnesota/1/1988(H7N9))]	ENSP00000417939|ATP6V0E2	1	GO:0015078|hydrogen ion transmembrane transporter activity
H7N9|>gi|115278576|gb|ABI84696.1| matrix protein 2 [Influenza A virus (A/turkey/Minnesota/1/1988(H7N9))]	ENSP00000419294|ATP6V1A	1	GO:0015992|proton transport
H7N9|>gi|115278576|gb|ABI84696.1| matrix protein 2 [Influenza A virus (A/turkey/Minnesota/1/1988(H7N9))]	ENSP00000419698|ATP6V1G2	1	GO:0015992|proton transport
H7N9|>gi|115278576|gb|ABI84696.1| matrix protein 2 [Influenza A virus (A/turkey/Minnesota/1/1988(H7N9))]	ENSP00000419866|ATP6V1G2	1	GO:0015992|proton transport
H7N9|>gi|115278576|gb|ABI84696.1| matrix protein 2 [Influenza A virus (A/turkey/Minnesota/1/1988(H7N9))]	ENSP00000420012|ATP6V0E2	1	GO:0015078|hydrogen ion transmembrane transporter activity
H7N9|>gi|115278576|gb|ABI84696.1| matrix protein 2 [Influenza A virus (A/turkey/Minnesota/1/1988(H7N9))]	ENSP00000420093|ATP6V1G2-DDX39B	1	GO:0015992|proton transport
H7N9|>gi|115278576|gb|ABI84696.1| matrix protein 2 [Influenza A virus (A/turkey/Minnesota/1/1988(H7N9))]	ENSP00000420191|ATP6V1G2-DDX39B	1	GO:0015992|proton transport
H7N9|>gi|115278576|gb|ABI84696.1| matrix protein 2 [Influenza A virus (A/turkey/Minnesota/1/1988(H7N9))]	ENSP00000420366|ATP5F1	1	GO:0015078|hydrogen ion transmembrane transporter activity
H7N9|>gi|115278576|gb|ABI84696.1| matrix protein 2 [Influenza A virus (A/turkey/Minnesota/1/1988(H7N9))]	ENSP00000420679|ATP6V0E2	1	GO:0015078|hydrogen ion transmembrane transporter activity
H7N9|>gi|115278576|gb|ABI84696.1| matrix protein 2 [Influenza A virus (A/turkey/Minnesota/1/1988(H7N9))]	ENSP00000421076|ATP5L2	1	GO:0015078|hydrogen ion transmembrane transporter activity
H7N9|>gi|115278576|gb|ABI84696.1| matrix protein 2 [Influenza A virus (A/turkey/Minnesota/1/1988(H7N9))]	ENSP00000422086|ATP5G1	1	GO:0015078|hydrogen ion transmembrane transporter activity
H7N9|>gi|115278576|gb|ABI84696.1| matrix protein 2 [Influenza A virus (A/turkey/Minnesota/1/1988(H7N9))]	ENSP00000422950|ATP5G1	1	GO:0015078|hydrogen ion transmembrane transporter activity
H7N9|>gi|115278576|gb|ABI84696.1| matrix protein 2 [Influenza A virus (A/turkey/Minnesota/1/1988(H7N9))]	ENSP00000426094|ATP5G1	1	GO:0015078|hydrogen ion transmembrane transporter activity
H7N9|>gi|115278576|gb|ABI84696.1| matrix protein 2 [Influenza A virus (A/turkey/Minnesota/1/1988(H7N9))]	ENSP00000426343|NNT	1	GO:0015992|proton transport
H7N9|>gi|115278576|gb|ABI84696.1| matrix protein 2 [Influenza A virus (A/turkey/Minnesota/1/1988(H7N9))]	ENSP00000427804|SLC36A1	1	GO:0015078|hydrogen ion transmembrane transporter activity
H7N9|>gi|115278576|gb|ABI84696.1| matrix protein 2 [Influenza A virus (A/turkey/Minnesota/1/1988(H7N9))]	ENSP00000428140|SLC36A1	1	GO:0015078|hydrogen ion transmembrane transporter activity
H7N9|>gi|115278576|gb|ABI84696.1| matrix protein 2 [Influenza A virus (A/turkey/Minnesota/1/1988(H7N9))]	ENSP00000428382|ATP6V0D2	1	GO:0015078|hydrogen ion transmembrane transporter activity
H7N9|>gi|115278576|gb|ABI84696.1| matrix protein 2 [Influenza A virus (A/turkey/Minnesota/1/1988(H7N9))]	ENSP00000428471|SLC36A1	1	GO:0015078|hydrogen ion transmembrane transporter activity
H7N9|>gi|115278576|gb|ABI84696.1| matrix protein 2 [Influenza A virus (A/turkey/Minnesota/1/1988(H7N9))]	ENSP00000428738|SLC36A1	1	GO:0015078|hydrogen ion transmembrane transporter activity
H7N9|>gi|115278576|gb|ABI84696.1| matrix protein 2 [Influenza A virus (A/turkey/Minnesota/1/1988(H7N9))]	ENSP00000429731|ATP6V0D2	1	GO:0015078|hydrogen ion transmembrane transporter activity
H7N9|>gi|115278576|gb|ABI84696.1| matrix protein 2 [Influenza A virus (A/turkey/Minnesota/1/1988(H7N9))]	ENSP00000429796|SLC36A1	1	GO:0015078|hydrogen ion transmembrane transporter activity
H7N9|>gi|115278576|gb|ABI84696.1| matrix protein 2 [Influenza A virus (A/turkey/Minnesota/1/1988(H7N9))]	ENSP00000430282|ATP6V1C1	1	GO:0015992|proton transport
H7N9|>gi|115278576|gb|ABI84696.1| matrix protein 2 [Influenza A virus (A/turkey/Minnesota/1/1988(H7N9))]	ENSP00000430305|SLC36A1	1	GO:0015078|hydrogen ion transmembrane transporter activity
H7N9|>gi|115278576|gb|ABI84696.1| matrix protein 2 [Influenza A virus (A/turkey/Minnesota/1/1988(H7N9))]	ENSP00000430682|ATP6V1B2	1	GO:0015992|proton transport
H7N9|>gi|115278576|gb|ABI84696.1| matrix protein 2 [Influenza A virus (A/turkey/Minnesota/1/1988(H7N9))]	ENSP00000430896|ATP6V0E1	1	GO:0015078|hydrogen ion transmembrane transporter activity
H7N9|>gi|115278576|gb|ABI84696.1| matrix protein 2 [Influenza A virus (A/turkey/Minnesota/1/1988(H7N9))]	ENSP00000431174|TCIRG1	1	GO:0015078|hydrogen ion transmembrane transporter activity
H7N9|>gi|115278576|gb|ABI84696.1| matrix protein 2 [Influenza A virus (A/turkey/Minnesota/1/1988(H7N9))]	ENSP00000431437|TCIRG1	1	GO:0015078|hydrogen ion transmembrane transporter activity
H7N9|>gi|115278576|gb|ABI84696.1| matrix protein 2 [Influenza A virus (A/turkey/Minnesota/1/1988(H7N9))]	ENSP00000432440|NOX5	1	GO:0015992|proton transport
H7N9|>gi|115278576|gb|ABI84696.1| matrix protein 2 [Influenza A virus (A/turkey/Minnesota/1/1988(H7N9))]	ENSP00000432754|ATP6V0B	1	GO:0015078|hydrogen ion transmembrane transporter activity
H7N9|>gi|115278576|gb|ABI84696.1| matrix protein 2 [Influenza A virus (A/turkey/Minnesota/1/1988(H7N9))]	ENSP00000432846|TCIRG1	1	GO:0015078|hydrogen ion transmembrane transporter activity
H7N9|>gi|115278576|gb|ABI84696.1| matrix protein 2 [Influenza A virus (A/turkey/Minnesota/1/1988(H7N9))]	ENSP00000432957|TCIRG1	1	GO:0015078|hydrogen ion transmembrane transporter activity
H7N9|>gi|115278576|gb|ABI84696.1| matrix protein 2 [Influenza A virus (A/turkey/Minnesota/1/1988(H7N9))]	ENSP00000432994|ATP6V0B	1	GO:0015078|hydrogen ion transmembrane transporter activity
H7N9|>gi|115278576|gb|ABI84696.1| matrix protein 2 [Influenza A virus (A/turkey/Minnesota/1/1988(H7N9))]	ENSP00000434094|ATP6V0B	1	GO:0015078|hydrogen ion transmembrane transporter activity
H7N9|>gi|115278576|gb|ABI84696.1| matrix protein 2 [Influenza A virus (A/turkey/Minnesota/1/1988(H7N9))]	ENSP00000434729|ATP6V0B	1	GO:0015078|hydrogen ion transmembrane transporter activity
H7N9|>gi|115278576|gb|ABI84696.1| matrix protein 2 [Influenza A virus (A/turkey/Minnesota/1/1988(H7N9))]	ENSP00000434865|ATP5L	1	GO:0015078|hydrogen ion transmembrane transporter activity
H7N9|>gi|115278576|gb|ABI84696.1| matrix protein 2 [Influenza A virus (A/turkey/Minnesota/1/1988(H7N9))]	ENSP00000435023|TCIRG1	1	GO:0015078|hydrogen ion transmembrane transporter activity
H7N9|>gi|115278576|gb|ABI84696.1| matrix protein 2 [Influenza A virus (A/turkey/Minnesota/1/1988(H7N9))]	ENSP00000436082|TCIRG1	1	GO:0015078|hydrogen ion transmembrane transporter activity
H7N9|>gi|115278576|gb|ABI84696.1| matrix protein 2 [Influenza A virus (A/turkey/Minnesota/1/1988(H7N9))]	ENSP00000437996|ATP5H	1	GO:0015078|hydrogen ion transmembrane transporter activity
H7N9|>gi|115278576|gb|ABI84696.1| matrix protein 2 [Influenza A virus (A/turkey/Minnesota/1/1988(H7N9))]	ENSP00000439874|ATP6V1A	1	GO:0015992|proton transport
H7N9|>gi|115278576|gb|ABI84696.1| matrix protein 2 [Influenza A virus (A/turkey/Minnesota/1/1988(H7N9))]	ENSP00000440198|ATP5A1	1	GO:0015992|proton transport
H7N9|>gi|115278576|gb|ABI84696.1| matrix protein 2 [Influenza A virus (A/turkey/Minnesota/1/1988(H7N9))]	ENSP00000441143|ATP6V0A2	1	GO:0015078|hydrogen ion transmembrane transporter activity
H7N9|>gi|115278576|gb|ABI84696.1| matrix protein 2 [Influenza A virus (A/turkey/Minnesota/1/1988(H7N9))]	ENSP00000441282|ATP6V0D1	1	GO:0015078|hydrogen ion transmembrane transporter activity
H7N9|>gi|115278576|gb|ABI84696.1| matrix protein 2 [Influenza A virus (A/turkey/Minnesota/1/1988(H7N9))]	ENSP00000442477|ASIC5	1	GO:0015992|proton transport
H7N9|>gi|115278576|gb|ABI84696.1| matrix protein 2 [Influenza A virus (A/turkey/Minnesota/1/1988(H7N9))]	ENSP00000442810|SLC11A2	1	GO:0015078|hydrogen ion transmembrane transporter activity
H7N9|>gi|115278576|gb|ABI84696.1| matrix protein 2 [Influenza A virus (A/turkey/Minnesota/1/1988(H7N9))]	ENSP00000443441|ATP6V0A2	1	GO:0015078|hydrogen ion transmembrane transporter activity
H7N9|>gi|115278576|gb|ABI84696.1| matrix protein 2 [Influenza A virus (A/turkey/Minnesota/1/1988(H7N9))]	ENSP00000443726|ATP6V0A2	1	GO:0015078|hydrogen ion transmembrane transporter activity
H7N9|>gi|115278576|gb|ABI84696.1| matrix protein 2 [Influenza A virus (A/turkey/Minnesota/1/1988(H7N9))]	ENSP00000443991|ATP6V0A1	1	GO:0015078|hydrogen ion transmembrane transporter activity
H7N9|>gi|115278576|gb|ABI84696.1| matrix protein 2 [Influenza A virus (A/turkey/Minnesota/1/1988(H7N9))]	ENSP00000444676|ATP6V0A1	1	GO:0015078|hydrogen ion transmembrane transporter activity
H7N9|>gi|115278576|gb|ABI84696.1| matrix protein 2 [Influenza A virus (A/turkey/Minnesota/1/1988(H7N9))]	ENSP00000446377|ATP6V0A1	1	GO:0015078|hydrogen ion transmembrane transporter activity
H7N9|>gi|115278576|gb|ABI84696.1| matrix protein 2 [Influenza A virus (A/turkey/Minnesota/1/1988(H7N9))]	ENSP00000446489|ATP5B	1	GO:0015992|proton transport
H7N9|>gi|115278576|gb|ABI84696.1| matrix protein 2 [Influenza A virus (A/turkey/Minnesota/1/1988(H7N9))]	ENSP00000446677|ATP5B	1	GO:0015992|proton transport
H7N9|>gi|115278576|gb|ABI84696.1| matrix protein 2 [Influenza A virus (A/turkey/Minnesota/1/1988(H7N9))]	ENSP00000446914|SLC11A2	1	GO:0015078|hydrogen ion transmembrane transporter activity
H7N9|>gi|115278576|gb|ABI84696.1| matrix protein 2 [Influenza A virus (A/turkey/Minnesota/1/1988(H7N9))]	ENSP00000446984|SLC11A2	1	GO:0015078|hydrogen ion transmembrane transporter activity
H7N9|>gi|115278576|gb|ABI84696.1| matrix protein 2 [Influenza A virus (A/turkey/Minnesota/1/1988(H7N9))]	ENSP00000447102|SLC11A2	1	GO:0015078|hydrogen ion transmembrane transporter activity
H7N9|>gi|115278576|gb|ABI84696.1| matrix protein 2 [Influenza A virus (A/turkey/Minnesota/1/1988(H7N9))]	ENSP00000447317|ATP5G2	1	GO:0015078|hydrogen ion transmembrane transporter activity
H7N9|>gi|115278576|gb|ABI84696.1| matrix protein 2 [Influenza A virus (A/turkey/Minnesota/1/1988(H7N9))]	ENSP00000447334|SLC11A2	1	GO:0015078|hydrogen ion transmembrane transporter activity
H7N9|>gi|115278576|gb|ABI84696.1| matrix protein 2 [Influenza A virus (A/turkey/Minnesota/1/1988(H7N9))]	ENSP00000447482|SLC11A2	1	GO:0015078|hydrogen ion transmembrane transporter activity
H7N9|>gi|115278576|gb|ABI84696.1| matrix protein 2 [Influenza A virus (A/turkey/Minnesota/1/1988(H7N9))]	ENSP00000447532|ATP6V1G2	1	GO:0015992|proton transport
H7N9|>gi|115278576|gb|ABI84696.1| matrix protein 2 [Influenza A virus (A/turkey/Minnesota/1/1988(H7N9))]	ENSP00000447571|ATP5B	1	GO:0015992|proton transport
H7N9|>gi|115278576|gb|ABI84696.1| matrix protein 2 [Influenza A virus (A/turkey/Minnesota/1/1988(H7N9))]	ENSP00000449209|SLC11A2	1	GO:0015078|hydrogen ion transmembrane transporter activity
H7N9|>gi|115278576|gb|ABI84696.1| matrix protein 2 [Influenza A virus (A/turkey/Minnesota/1/1988(H7N9))]	ENSP00000449601|HVCN1	1	GO:0015992|proton transport
H7N9|>gi|115278576|gb|ABI84696.1| matrix protein 2 [Influenza A virus (A/turkey/Minnesota/1/1988(H7N9))]	ENSP00000450233|ATP5B	1	GO:0015992|proton transport
H7N9|>gi|115278576|gb|ABI84696.1| matrix protein 2 [Influenza A virus (A/turkey/Minnesota/1/1988(H7N9))]	ENSP00000450297|ATP5B	1	GO:0015992|proton transport
H7N9|>gi|115278576|gb|ABI84696.1| matrix protein 2 [Influenza A virus (A/turkey/Minnesota/1/1988(H7N9))]	ENSP00000454426|DASS-161H22.6	1	GO:0015992|proton transport
H7N9|>gi|115278576|gb|ABI84696.1| matrix protein 2 [Influenza A virus (A/turkey/Minnesota/1/1988(H7N9))]	ENSP00000454868|ATP6V0C	1	GO:0015078|hydrogen ion transmembrane transporter activity
H7N9|>gi|115278576|gb|ABI84696.1| matrix protein 2 [Influenza A virus (A/turkey/Minnesota/1/1988(H7N9))]	ENSP00000455446|ATP6V0D1	1	GO:0015078|hydrogen ion transmembrane transporter activity
H7N9|>gi|115278576|gb|ABI84696.1| matrix protein 2 [Influenza A virus (A/turkey/Minnesota/1/1988(H7N9))]	ENSP00000455695|ATP6V0D1	1	GO:0015078|hydrogen ion transmembrane transporter activity
H7N9|>gi|115278576|gb|ABI84696.1| matrix protein 2 [Influenza A virus (A/turkey/Minnesota/1/1988(H7N9))]	ENSP00000455802|ATP6V0D1	1	GO:0015078|hydrogen ion transmembrane transporter activity
H7N9|>gi|115278576|gb|ABI84696.1| matrix protein 2 [Influenza A virus (A/turkey/Minnesota/1/1988(H7N9))]	ENSP00000456077|ATP6V0C	1	GO:0015078|hydrogen ion transmembrane transporter activity
H7N9|>gi|115278576|gb|ABI84696.1| matrix protein 2 [Influenza A virus (A/turkey/Minnesota/1/1988(H7N9))]	ENSP00000456695|ATP6V0D1	1	GO:0015078|hydrogen ion transmembrane transporter activity
H7N9|>gi|115278576|gb|ABI84696.1| matrix protein 2 [Influenza A virus (A/turkey/Minnesota/1/1988(H7N9))]	ENSP00000457104|ATP6V0D1	1	GO:0015078|hydrogen ion transmembrane transporter activity
H7N9|>gi|115278576|gb|ABI84696.1| matrix protein 2 [Influenza A virus (A/turkey/Minnesota/1/1988(H7N9))]	ENSP00000457105|ATP6V0D1	1	GO:0015078|hydrogen ion transmembrane transporter activity
H7N9|>gi|115278576|gb|ABI84696.1| matrix protein 2 [Influenza A virus (A/turkey/Minnesota/1/1988(H7N9))]	ENSP00000457744|ATP6V0D1	1	GO:0015078|hydrogen ion transmembrane transporter activity
H7N9|>gi|115278576|gb|ABI84696.1| matrix protein 2 [Influenza A virus (A/turkey/Minnesota/1/1988(H7N9))]	ENSP00000457782|ATP6V0C	1	GO:0015078|hydrogen ion transmembrane transporter activity
H7N9|>gi|115278576|gb|ABI84696.1| matrix protein 2 [Influenza A virus (A/turkey/Minnesota/1/1988(H7N9))]	ENSP00000458423|ATP5G1	1	GO:0015078|hydrogen ion transmembrane transporter activity
H7N9|>gi|115278576|gb|ABI84696.1| matrix protein 2 [Influenza A virus (A/turkey/Minnesota/1/1988(H7N9))]	ENSP00000461228|ATP6V1G3	1	GO:0015992|proton transport
H7N9|>gi|115278576|gb|ABI84696.1| matrix protein 2 [Influenza A virus (A/turkey/Minnesota/1/1988(H7N9))]	ENSP00000461329|ATP6V1G3	1	GO:0015992|proton transport
H7N9|>gi|115278576|gb|ABI84696.1| matrix protein 2 [Influenza A virus (A/turkey/Minnesota/1/1988(H7N9))]	ENSP00000461616|ATP6V1G3	1	GO:0015992|proton transport
H7N9|>gi|115278576|gb|ABI84696.1| matrix protein 2 [Influenza A virus (A/turkey/Minnesota/1/1988(H7N9))]	ENSP00000463328|ATP6V0D1	1	GO:0015078|hydrogen ion transmembrane transporter activity
H7N9|>gi|115278578|gb|ABI84697.1| neuraminidase [Influenza A virus (A/turkey/Minnesota/1/1988(H7N9))]	ENSP00000002165|FUCA2	1	GO:0005975|carbohydrate metabolic process
H7N9|>gi|115278578|gb|ABI84697.1| neuraminidase [Influenza A virus (A/turkey/Minnesota/1/1988(H7N9))]	ENSP00000026218|PIGQ	1	GO:0005975|carbohydrate metabolic process
H7N9|>gi|115278578|gb|ABI84697.1| neuraminidase [Influenza A virus (A/turkey/Minnesota/1/1988(H7N9))]	ENSP00000029410|B4GALT7	1	GO:0005975|carbohydrate metabolic process
H7N9|>gi|115278578|gb|ABI84697.1| neuraminidase [Influenza A virus (A/turkey/Minnesota/1/1988(H7N9))]	ENSP00000075120|SLC2A3	1	GO:0005975|carbohydrate metabolic process
H7N9|>gi|115278578|gb|ABI84697.1| neuraminidase [Influenza A virus (A/turkey/Minnesota/1/1988(H7N9))]	ENSP00000164139|PYGM	1	GO:0005975|carbohydrate metabolic process
H7N9|>gi|115278578|gb|ABI84697.1| neuraminidase [Influenza A virus (A/turkey/Minnesota/1/1988(H7N9))]	ENSP00000207870|XYLB	1	GO:0005975|carbohydrate metabolic process
H7N9|>gi|115278578|gb|ABI84697.1| neuraminidase [Influenza A virus (A/turkey/Minnesota/1/1988(H7N9))]	ENSP00000209873|AAAS	1	GO:0005975|carbohydrate metabolic process
H7N9|>gi|115278578|gb|ABI84697.1| neuraminidase [Influenza A virus (A/turkey/Minnesota/1/1988(H7N9))]	ENSP00000215882|SLC25A1	1	GO:0005975|carbohydrate metabolic process
H7N9|>gi|115278578|gb|ABI84697.1| neuraminidase [Influenza A virus (A/turkey/Minnesota/1/1988(H7N9))]	ENSP00000216392|PYGL	1	GO:0005975|carbohydrate metabolic process
H7N9|>gi|115278578|gb|ABI84697.1| neuraminidase [Influenza A virus (A/turkey/Minnesota/1/1988(H7N9))]	ENSP00000216780|PCK2	1	GO:0005975|carbohydrate metabolic process
H7N9|>gi|115278578|gb|ABI84697.1| neuraminidase [Influenza A virus (A/turkey/Minnesota/1/1988(H7N9))]	ENSP00000216962|PYGB	1	GO:0005975|carbohydrate metabolic process
H7N9|>gi|115278578|gb|ABI84697.1| neuraminidase [Influenza A virus (A/turkey/Minnesota/1/1988(H7N9))]	ENSP00000217901|IDH3G	1	GO:0005975|carbohydrate metabolic process
H7N9|>gi|115278578|gb|ABI84697.1| neuraminidase [Influenza A virus (A/turkey/Minnesota/1/1988(H7N9))]	ENSP00000218516|GLA	1	GO:0005975|carbohydrate metabolic process
H7N9|>gi|115278578|gb|ABI84697.1| neuraminidase [Influenza A virus (A/turkey/Minnesota/1/1988(H7N9))]	ENSP00000219322|HAS3	1	GO:0005975|carbohydrate metabolic process
H7N9|>gi|115278578|gb|ABI84697.1| neuraminidase [Influenza A virus (A/turkey/Minnesota/1/1988(H7N9))]	ENSP00000221363|MAN2B1	1	GO:0005975|carbohydrate metabolic process
H7N9|>gi|115278578|gb|ABI84697.1| neuraminidase [Influenza A virus (A/turkey/Minnesota/1/1988(H7N9))]	ENSP00000221403|DHDH	1	GO:0005975|carbohydrate metabolic process
H7N9|>gi|115278578|gb|ABI84697.1| neuraminidase [Influenza A virus (A/turkey/Minnesota/1/1988(H7N9))]	ENSP00000222286|GAPDHS	1	GO:0005975|carbohydrate metabolic process
H7N9|>gi|115278578|gb|ABI84697.1| neuraminidase [Influenza A virus (A/turkey/Minnesota/1/1988(H7N9))]	ENSP00000223026|HYAL4	1	GO:0005975|carbohydrate metabolic process
H7N9|>gi|115278578|gb|ABI84697.1| neuraminidase [Influenza A virus (A/turkey/Minnesota/1/1988(H7N9))]	ENSP00000223028|SPAM1	1	GO:0005975|carbohydrate metabolic process
H7N9|>gi|115278578|gb|ABI84697.1| neuraminidase [Influenza A virus (A/turkey/Minnesota/1/1988(H7N9))]	ENSP00000223366|GCK	1	GO:0005975|carbohydrate metabolic process
H7N9|>gi|115278578|gb|ABI84697.1| neuraminidase [Influenza A virus (A/turkey/Minnesota/1/1988(H7N9))]	ENSP00000225519|SHPK	1	GO:0005975|carbohydrate metabolic process
H7N9|>gi|115278578|gb|ABI84697.1| neuraminidase [Influenza A virus (A/turkey/Minnesota/1/1988(H7N9))]	ENSP00000225614|GALK1	1	GO:0005975|carbohydrate metabolic process
H7N9|>gi|115278578|gb|ABI84697.1| neuraminidase [Influenza A virus (A/turkey/Minnesota/1/1988(H7N9))]	ENSP00000225665|SLC25A11	1	GO:0005975|carbohydrate metabolic process
H7N9|>gi|115278578|gb|ABI84697.1| neuraminidase [Influenza A virus (A/turkey/Minnesota/1/1988(H7N9))]	ENSP00000225696|NUP88	1	GO:0005975|carbohydrate metabolic process
H7N9|>gi|115278578|gb|ABI84697.1| neuraminidase [Influenza A virus (A/turkey/Minnesota/1/1988(H7N9))]	ENSP00000226253|ALDOC	1	GO:0005975|carbohydrate metabolic process
H7N9|>gi|115278578|gb|ABI84697.1| neuraminidase [Influenza A virus (A/turkey/Minnesota/1/1988(H7N9))]	ENSP00000226578|MANBA	1	GO:0005975|carbohydrate metabolic process
H7N9|>gi|115278578|gb|ABI84697.1| neuraminidase [Influenza A virus (A/turkey/Minnesota/1/1988(H7N9))]	ENSP00000227157|LDHA	1	GO:0005975|carbohydrate metabolic process
H7N9|>gi|115278578|gb|ABI84697.1| neuraminidase [Influenza A virus (A/turkey/Minnesota/1/1988(H7N9))]	ENSP00000229179|NUP107	1	GO:0005975|carbohydrate metabolic process
H7N9|>gi|115278578|gb|ABI84697.1| neuraminidase [Influenza A virus (A/turkey/Minnesota/1/1988(H7N9))]	ENSP00000229239|GAPDH	1	GO:0005975|carbohydrate metabolic process
H7N9|>gi|115278578|gb|ABI84697.1| neuraminidase [Influenza A virus (A/turkey/Minnesota/1/1988(H7N9))]	ENSP00000229270|TPI1	1	GO:0005975|carbohydrate metabolic process
H7N9|>gi|115278578|gb|ABI84697.1| neuraminidase [Influenza A virus (A/turkey/Minnesota/1/1988(H7N9))]	ENSP00000229277|ENO2	1	GO:0005975|carbohydrate metabolic process
H7N9|>gi|115278578|gb|ABI84697.1| neuraminidase [Influenza A virus (A/turkey/Minnesota/1/1988(H7N9))]	ENSP00000229319|LDHB	1	GO:0005975|carbohydrate metabolic process
H7N9|>gi|115278578|gb|ABI84697.1| neuraminidase [Influenza A virus (A/turkey/Minnesota/1/1988(H7N9))]	ENSP00000229725|NEU1	1	GO:0004308|exo-alpha-sialidase activity
H7N9|>gi|115278578|gb|ABI84697.1| neuraminidase [Influenza A virus (A/turkey/Minnesota/1/1988(H7N9))]	ENSP00000231498|NUP155	1	GO:0005975|carbohydrate metabolic process
H7N9|>gi|115278578|gb|ABI84697.1| neuraminidase [Influenza A virus (A/turkey/Minnesota/1/1988(H7N9))]	ENSP00000232375|PFKFB4	1	GO:0005975|carbohydrate metabolic process
H7N9|>gi|115278578|gb|ABI84697.1| neuraminidase [Influenza A virus (A/turkey/Minnesota/1/1988(H7N9))]	ENSP00000233114|MDH1	1	GO:0005975|carbohydrate metabolic process
H7N9|>gi|115278578|gb|ABI84697.1| neuraminidase [Influenza A virus (A/turkey/Minnesota/1/1988(H7N9))]	ENSP00000233840|NEU2	1	GO:0004308|exo-alpha-sialidase activity
H7N9|>gi|115278578|gb|ABI84697.1| neuraminidase [Influenza A virus (A/turkey/Minnesota/1/1988(H7N9))]	ENSP00000234590|ENO1	1	GO:0005975|carbohydrate metabolic process
H7N9|>gi|115278578|gb|ABI84697.1| neuraminidase [Influenza A virus (A/turkey/Minnesota/1/1988(H7N9))]	ENSP00000235835|AKR7A2	1	GO:0005975|carbohydrate metabolic process
H7N9|>gi|115278578|gb|ABI84697.1| neuraminidase [Influenza A virus (A/turkey/Minnesota/1/1988(H7N9))]	ENSP00000236709|A4GNT	1	GO:0005975|carbohydrate metabolic process
H7N9|>gi|115278578|gb|ABI84697.1| neuraminidase [Influenza A virus (A/turkey/Minnesota/1/1988(H7N9))]	ENSP00000237019|B4GALT6	1	GO:0005975|carbohydrate metabolic process
H7N9|>gi|115278578|gb|ABI84697.1| neuraminidase [Influenza A virus (A/turkey/Minnesota/1/1988(H7N9))]	ENSP00000245206|GOT2	1	GO:0005975|carbohydrate metabolic process
H7N9|>gi|115278578|gb|ABI84697.1| neuraminidase [Influenza A virus (A/turkey/Minnesota/1/1988(H7N9))]	ENSP00000245544|NUP85	1	GO:0005975|carbohydrate metabolic process
H7N9|>gi|115278578|gb|ABI84697.1| neuraminidase [Influenza A virus (A/turkey/Minnesota/1/1988(H7N9))]	ENSP00000247933|IDUA	1	GO:0005975|carbohydrate metabolic process
H7N9|>gi|115278578|gb|ABI84697.1| neuraminidase [Influenza A virus (A/turkey/Minnesota/1/1988(H7N9))]	ENSP00000251074|NUP37	1	GO:0005975|carbohydrate metabolic process
H7N9|>gi|115278578|gb|ABI84697.1| neuraminidase [Influenza A virus (A/turkey/Minnesota/1/1988(H7N9))]	ENSP00000251566|UGT2A3	1	GO:0005975|carbohydrate metabolic process
H7N9|>gi|115278578|gb|ABI84697.1| neuraminidase [Influenza A virus (A/turkey/Minnesota/1/1988(H7N9))]	ENSP00000252603|PGLS	1	GO:0005975|carbohydrate metabolic process
H7N9|>gi|115278578|gb|ABI84697.1| neuraminidase [Influenza A virus (A/turkey/Minnesota/1/1988(H7N9))]	ENSP00000252675|FUT5	1	GO:0005975|carbohydrate metabolic process
H7N9|>gi|115278578|gb|ABI84697.1| neuraminidase [Influenza A virus (A/turkey/Minnesota/1/1988(H7N9))]	ENSP00000253778|GFPT2	1	GO:0005975|carbohydrate metabolic process
H7N9|>gi|115278578|gb|ABI84697.1| neuraminidase [Influenza A virus (A/turkey/Minnesota/1/1988(H7N9))]	ENSP00000253801|G6PC	1	GO:0005975|carbohydrate metabolic process
H7N9|>gi|115278578|gb|ABI84697.1| neuraminidase [Influenza A virus (A/turkey/Minnesota/1/1988(H7N9))]	ENSP00000254508|NUP210	1	GO:0005975|carbohydrate metabolic process
H7N9|>gi|115278578|gb|ABI84697.1| neuraminidase [Influenza A virus (A/turkey/Minnesota/1/1988(H7N9))]	ENSP00000255409|CHI3L1	1	GO:0005975|carbohydrate metabolic process
H7N9|>gi|115278578|gb|ABI84697.1| neuraminidase [Influenza A virus (A/turkey/Minnesota/1/1988(H7N9))]	ENSP00000255427|CHIT1	1	GO:0005975|carbohydrate metabolic process
H7N9|>gi|115278578|gb|ABI84697.1| neuraminidase [Influenza A virus (A/turkey/Minnesota/1/1988(H7N9))]	ENSP00000257408|KLB	1	GO:0005975|carbohydrate metabolic process
H7N9|>gi|115278578|gb|ABI84697.1| neuraminidase [Influenza A virus (A/turkey/Minnesota/1/1988(H7N9))]	ENSP00000257622|POM121	1	GO:0005975|carbohydrate metabolic process
H7N9|>gi|115278578|gb|ABI84697.1| neuraminidase [Influenza A virus (A/turkey/Minnesota/1/1988(H7N9))]	ENSP00000258742|NUPL2	1	GO:0005975|carbohydrate metabolic process
H7N9|>gi|115278578|gb|ABI84697.1| neuraminidase [Influenza A virus (A/turkey/Minnesota/1/1988(H7N9))]	ENSP00000260598|KHK	1	GO:0005975|carbohydrate metabolic process
H7N9|>gi|115278578|gb|ABI84697.1| neuraminidase [Influenza A virus (A/turkey/Minnesota/1/1988(H7N9))]	ENSP00000260599|KHK	1	GO:0005975|carbohydrate metabolic process
H7N9|>gi|115278578|gb|ABI84697.1| neuraminidase [Influenza A virus (A/turkey/Minnesota/1/1988(H7N9))]	ENSP00000260649|SLC3A1	1	GO:0005975|carbohydrate metabolic process
H7N9|>gi|115278578|gb|ABI84697.1| neuraminidase [Influenza A virus (A/turkey/Minnesota/1/1988(H7N9))]	ENSP00000261195|GYS2	1	GO:0005975|carbohydrate metabolic process
H7N9|>gi|115278578|gb|ABI84697.1| neuraminidase [Influenza A virus (A/turkey/Minnesota/1/1988(H7N9))]	ENSP00000261304|GALC	1	GO:0005975|carbohydrate metabolic process
H7N9|>gi|115278578|gb|ABI84697.1| neuraminidase [Influenza A virus (A/turkey/Minnesota/1/1988(H7N9))]	ENSP00000261396|NUP133	1	GO:0005975|carbohydrate metabolic process
H7N9|>gi|115278578|gb|ABI84697.1| neuraminidase [Influenza A virus (A/turkey/Minnesota/1/1988(H7N9))]	ENSP00000261416|HEXB	1	GO:0005975|carbohydrate metabolic process
H7N9|>gi|115278578|gb|ABI84697.1| neuraminidase [Influenza A virus (A/turkey/Minnesota/1/1988(H7N9))]	ENSP00000261483|MAN2A1	1	GO:0005975|carbohydrate metabolic process
H7N9|>gi|115278578|gb|ABI84697.1| neuraminidase [Influenza A virus (A/turkey/Minnesota/1/1988(H7N9))]	ENSP00000261733|ALDH2	1	GO:0005975|carbohydrate metabolic process
H7N9|>gi|115278578|gb|ABI84697.1| neuraminidase [Influenza A virus (A/turkey/Minnesota/1/1988(H7N9))]	ENSP00000262077|NUP153	1	GO:0005975|carbohydrate metabolic process
H7N9|>gi|115278578|gb|ABI84697.1| neuraminidase [Influenza A virus (A/turkey/Minnesota/1/1988(H7N9))]	ENSP00000262124|SEH1L	1	GO:0005975|carbohydrate metabolic process
H7N9|>gi|115278578|gb|ABI84697.1| neuraminidase [Influenza A virus (A/turkey/Minnesota/1/1988(H7N9))]	ENSP00000263276|GYS1	1	GO:0005975|carbohydrate metabolic process
H7N9|>gi|115278578|gb|ABI84697.1| neuraminidase [Influenza A virus (A/turkey/Minnesota/1/1988(H7N9))]	ENSP00000264029|TREH	1	GO:0005975|carbohydrate metabolic process
H7N9|>gi|115278578|gb|ABI84697.1| neuraminidase [Influenza A virus (A/turkey/Minnesota/1/1988(H7N9))]	ENSP00000264162|LCT	1	GO:0005975|carbohydrate metabolic process
H7N9|>gi|115278578|gb|ABI84697.1| neuraminidase [Influenza A virus (A/turkey/Minnesota/1/1988(H7N9))]	ENSP00000264382|SI	1	GO:0005975|carbohydrate metabolic process
H7N9|>gi|115278578|gb|ABI84697.1| neuraminidase [Influenza A virus (A/turkey/Minnesota/1/1988(H7N9))]	ENSP00000264717|GCKR	1	GO:0005975|carbohydrate metabolic process
H7N9|>gi|115278578|gb|ABI84697.1| neuraminidase [Influenza A virus (A/turkey/Minnesota/1/1988(H7N9))]	ENSP00000264883|NUP54	1	GO:0005975|carbohydrate metabolic process
H7N9|>gi|115278578|gb|ABI84697.1| neuraminidase [Influenza A virus (A/turkey/Minnesota/1/1988(H7N9))]	ENSP00000264968|MGAT4A	1	GO:0005975|carbohydrate metabolic process
H7N9|>gi|115278578|gb|ABI84697.1| neuraminidase [Influenza A virus (A/turkey/Minnesota/1/1988(H7N9))]	ENSP00000265000|GALNT7	1	GO:0005975|carbohydrate metabolic process
H7N9|>gi|115278578|gb|ABI84697.1| neuraminidase [Influenza A virus (A/turkey/Minnesota/1/1988(H7N9))]	ENSP00000265403|UGT2B10	1	GO:0005975|carbohydrate metabolic process
H7N9|>gi|115278578|gb|ABI84697.1| neuraminidase [Influenza A virus (A/turkey/Minnesota/1/1988(H7N9))]	ENSP00000265631|SLC25A13	1	GO:0005975|carbohydrate metabolic process
H7N9|>gi|115278578|gb|ABI84697.1| neuraminidase [Influenza A virus (A/turkey/Minnesota/1/1988(H7N9))]	ENSP00000266031|HYAL1	1	GO:0005975|carbohydrate metabolic process
H7N9|>gi|115278578|gb|ABI84697.1| neuraminidase [Influenza A virus (A/turkey/Minnesota/1/1988(H7N9))]	ENSP00000266088|SLC5A1	1	GO:0005975|carbohydrate metabolic process
H7N9|>gi|115278578|gb|ABI84697.1| neuraminidase [Influenza A virus (A/turkey/Minnesota/1/1988(H7N9))]	ENSP00000267978|MAN2C1	1	GO:0005975|carbohydrate metabolic process
H7N9|>gi|115278578|gb|ABI84697.1| neuraminidase [Influenza A virus (A/turkey/Minnesota/1/1988(H7N9))]	ENSP00000268097|HEXA	1	GO:0005975|carbohydrate metabolic process
H7N9|>gi|115278578|gb|ABI84697.1| neuraminidase [Influenza A virus (A/turkey/Minnesota/1/1988(H7N9))]	ENSP00000268164|ST8SIA2	1	GO:0005975|carbohydrate metabolic process
H7N9|>gi|115278578|gb|ABI84697.1| neuraminidase [Influenza A virus (A/turkey/Minnesota/1/1988(H7N9))]	ENSP00000269097|G6PC3	1	GO:0005975|carbohydrate metabolic process
H7N9|>gi|115278578|gb|ABI84697.1| neuraminidase [Influenza A virus (A/turkey/Minnesota/1/1988(H7N9))]	ENSP00000269848|PFKL	1	GO:0005975|carbohydrate metabolic process
H7N9|>gi|115278578|gb|ABI84697.1| neuraminidase [Influenza A virus (A/turkey/Minnesota/1/1988(H7N9))]	ENSP00000270776|PGD	1	GO:0005975|carbohydrate metabolic process
H7N9|>gi|115278578|gb|ABI84697.1| neuraminidase [Influenza A virus (A/turkey/Minnesota/1/1988(H7N9))]	ENSP00000271312|CHIA	1	GO:0005975|carbohydrate metabolic process
H7N9|>gi|115278578|gb|ABI84697.1| neuraminidase [Influenza A virus (A/turkey/Minnesota/1/1988(H7N9))]	ENSP00000272252|GALM	1	GO:0005975|carbohydrate metabolic process
H7N9|>gi|115278578|gb|ABI84697.1| neuraminidase [Influenza A virus (A/turkey/Minnesota/1/1988(H7N9))]	ENSP00000272298|CALM2	1	GO:0005975|carbohydrate metabolic process
H7N9|>gi|115278578|gb|ABI84697.1| neuraminidase [Influenza A virus (A/turkey/Minnesota/1/1988(H7N9))]	ENSP00000274278|UGT3A1	1	GO:0005975|carbohydrate metabolic process
H7N9|>gi|115278578|gb|ABI84697.1| neuraminidase [Influenza A virus (A/turkey/Minnesota/1/1988(H7N9))]	ENSP00000276055|CHST7	1	GO:0005975|carbohydrate metabolic process
H7N9|>gi|115278578|gb|ABI84697.1| neuraminidase [Influenza A virus (A/turkey/Minnesota/1/1988(H7N9))]	ENSP00000280704|LDHC	1	GO:0005975|carbohydrate metabolic process
H7N9|>gi|115278578|gb|ABI84697.1| neuraminidase [Influenza A virus (A/turkey/Minnesota/1/1988(H7N9))]	ENSP00000280706|LDHAL6A	1	GO:0005975|carbohydrate metabolic process
H7N9|>gi|115278578|gb|ABI84697.1| neuraminidase [Influenza A virus (A/turkey/Minnesota/1/1988(H7N9))]	ENSP00000282075|G6PC2	1	GO:0005975|carbohydrate metabolic process
H7N9|>gi|115278578|gb|ABI84697.1| neuraminidase [Influenza A virus (A/turkey/Minnesota/1/1988(H7N9))]	ENSP00000282507|UGT3A2	1	GO:0005975|carbohydrate metabolic process
H7N9|>gi|115278578|gb|ABI84697.1| neuraminidase [Influenza A virus (A/turkey/Minnesota/1/1988(H7N9))]	ENSP00000282541|GPD1L	1	GO:0005975|carbohydrate metabolic process
H7N9|>gi|115278578|gb|ABI84697.1| neuraminidase [Influenza A virus (A/turkey/Minnesota/1/1988(H7N9))]	ENSP00000283195|RANBP2	1	GO:0005975|carbohydrate metabolic process
H7N9|>gi|115278578|gb|ABI84697.1| neuraminidase [Influenza A virus (A/turkey/Minnesota/1/1988(H7N9))]	ENSP00000283646|RPIA	1	GO:0005975|carbohydrate metabolic process
H7N9|>gi|115278578|gb|ABI84697.1| neuraminidase [Influenza A virus (A/turkey/Minnesota/1/1988(H7N9))]	ENSP00000283977|PGM3	1	GO:0005975|carbohydrate metabolic process
H7N9|>gi|115278578|gb|ABI84697.1| neuraminidase [Influenza A virus (A/turkey/Minnesota/1/1988(H7N9))]	ENSP00000285599|MAN2B2	1	GO:0005975|carbohydrate metabolic process
H7N9|>gi|115278578|gb|ABI84697.1| neuraminidase [Influenza A virus (A/turkey/Minnesota/1/1988(H7N9))]	ENSP00000285930|AKR1B1	1	GO:0005975|carbohydrate metabolic process
H7N9|>gi|115278578|gb|ABI84697.1| neuraminidase [Influenza A virus (A/turkey/Minnesota/1/1988(H7N9))]	ENSP00000285968|NUP205	1	GO:0005975|carbohydrate metabolic process
H7N9|>gi|115278578|gb|ABI84697.1| neuraminidase [Influenza A virus (A/turkey/Minnesota/1/1988(H7N9))]	ENSP00000286604|UGT2A1	1	GO:0005975|carbohydrate metabolic process
H7N9|>gi|115278578|gb|ABI84697.1| neuraminidase [Influenza A virus (A/turkey/Minnesota/1/1988(H7N9))]	ENSP00000290573|HK2	1	GO:0005975|carbohydrate metabolic process
H7N9|>gi|115278578|gb|ABI84697.1| neuraminidase [Influenza A virus (A/turkey/Minnesota/1/1988(H7N9))]	ENSP00000291295|CALM3	1	GO:0005975|carbohydrate metabolic process
H7N9|>gi|115278578|gb|ABI84697.1| neuraminidase [Influenza A virus (A/turkey/Minnesota/1/1988(H7N9))]	ENSP00000291527|TFF1	1	GO:0005975|carbohydrate metabolic process
H7N9|>gi|115278578|gb|ABI84697.1| neuraminidase [Influenza A virus (A/turkey/Minnesota/1/1988(H7N9))]	ENSP00000291567|G6PD	1	GO:0005975|carbohydrate metabolic process
H7N9|>gi|115278578|gb|ABI84697.1| neuraminidase [Influenza A virus (A/turkey/Minnesota/1/1988(H7N9))]	ENSP00000292432|HK3	1	GO:0005975|carbohydrate metabolic process
H7N9|>gi|115278578|gb|ABI84697.1| neuraminidase [Influenza A virus (A/turkey/Minnesota/1/1988(H7N9))]	ENSP00000292591|MGAT4B	1	GO:0005975|carbohydrate metabolic process
H7N9|>gi|115278578|gb|ABI84697.1| neuraminidase [Influenza A virus (A/turkey/Minnesota/1/1988(H7N9))]	ENSP00000292778|YDJC	1	GO:0005975|carbohydrate metabolic process
H7N9|>gi|115278578|gb|ABI84697.1| neuraminidase [Influenza A virus (A/turkey/Minnesota/1/1988(H7N9))]	ENSP00000294064|NEU3	1	GO:0005975|carbohydrate metabolic process
H7N9|>gi|115278578|gb|ABI84697.1| neuraminidase [Influenza A virus (A/turkey/Minnesota/1/1988(H7N9))]	ENSP00000294724|AGL	1	GO:0005975|carbohydrate metabolic process
H7N9|>gi|115278578|gb|ABI84697.1| neuraminidase [Influenza A virus (A/turkey/Minnesota/1/1988(H7N9))]	ENSP00000295119|NUP35	1	GO:0005975|carbohydrate metabolic process
H7N9|>gi|115278578|gb|ABI84697.1| neuraminidase [Influenza A virus (A/turkey/Minnesota/1/1988(H7N9))]	ENSP00000295448|GNPDA2	1	GO:0005975|carbohydrate metabolic process
H7N9|>gi|115278578|gb|ABI84697.1| neuraminidase [Influenza A virus (A/turkey/Minnesota/1/1988(H7N9))]	ENSP00000295759|GLB1L	1	GO:0005975|carbohydrate metabolic process
H7N9|>gi|115278578|gb|ABI84697.1| neuraminidase [Influenza A virus (A/turkey/Minnesota/1/1988(H7N9))]	ENSP00000296048|GYG1	1	GO:0005975|carbohydrate metabolic process
H7N9|>gi|115278578|gb|ABI84697.1| neuraminidase [Influenza A virus (A/turkey/Minnesota/1/1988(H7N9))]	ENSP00000296575|HHIP	1	GO:0005975|carbohydrate metabolic process
H7N9|>gi|115278578|gb|ABI84697.1| neuraminidase [Influenza A virus (A/turkey/Minnesota/1/1988(H7N9))]	ENSP00000297185|HSPA9	1	GO:0005975|carbohydrate metabolic process
H7N9|>gi|115278578|gb|ABI84697.1| neuraminidase [Influenza A virus (A/turkey/Minnesota/1/1988(H7N9))]	ENSP00000297283|PGAM2	1	GO:0005975|carbohydrate metabolic process
H7N9|>gi|115278578|gb|ABI84697.1| neuraminidase [Influenza A virus (A/turkey/Minnesota/1/1988(H7N9))]	ENSP00000297373|PHKG1	1	GO:0005975|carbohydrate metabolic process
H7N9|>gi|115278578|gb|ABI84697.1| neuraminidase [Influenza A virus (A/turkey/Minnesota/1/1988(H7N9))]	ENSP00000297625|KIAA1161	1	GO:0005975|carbohydrate metabolic process
H7N9|>gi|115278578|gb|ABI84697.1| neuraminidase [Influenza A virus (A/turkey/Minnesota/1/1988(H7N9))]	ENSP00000298198|PGM2L1	1	GO:0005975|carbohydrate metabolic process
H7N9|>gi|115278578|gb|ABI84697.1| neuraminidase [Influenza A virus (A/turkey/Minnesota/1/1988(H7N9))]	ENSP00000298649|HK1	1	GO:0005975|carbohydrate metabolic process
H7N9|>gi|115278578|gb|ABI84697.1| neuraminidase [Influenza A virus (A/turkey/Minnesota/1/1988(H7N9))]	ENSP00000299167|PHKB	1	GO:0005975|carbohydrate metabolic process
H7N9|>gi|115278578|gb|ABI84697.1| neuraminidase [Influenza A virus (A/turkey/Minnesota/1/1988(H7N9))]	ENSP00000299518|IDH3A	1	GO:0005975|carbohydrate metabolic process
H7N9|>gi|115278578|gb|ABI84697.1| neuraminidase [Influenza A virus (A/turkey/Minnesota/1/1988(H7N9))]	ENSP00000301149|GPD1	1	GO:0005975|carbohydrate metabolic process
H7N9|>gi|115278578|gb|ABI84697.1| neuraminidase [Influenza A virus (A/turkey/Minnesota/1/1988(H7N9))]	ENSP00000301439|AC018755.11	1	GO:0005975|carbohydrate metabolic process
H7N9|>gi|115278578|gb|ABI84697.1| neuraminidase [Influenza A virus (A/turkey/Minnesota/1/1988(H7N9))]	ENSP00000302393|LDHAL6B	1	GO:0005975|carbohydrate metabolic process
H7N9|>gi|115278578|gb|ABI84697.1| neuraminidase [Influenza A virus (A/turkey/Minnesota/1/1988(H7N9))]	ENSP00000302599|FUT9	1	GO:0005975|carbohydrate metabolic process
H7N9|>gi|115278578|gb|ABI84697.1| neuraminidase [Influenza A virus (A/turkey/Minnesota/1/1988(H7N9))]	ENSP00000302728|GUSB	1	GO:0005975|carbohydrate metabolic process
H7N9|>gi|115278578|gb|ABI84697.1| neuraminidase [Influenza A virus (A/turkey/Minnesota/1/1988(H7N9))]	ENSP00000303174|UGT1A6	1	GO:0005975|carbohydrate metabolic process
H7N9|>gi|115278578|gb|ABI84697.1| neuraminidase [Influenza A virus (A/turkey/Minnesota/1/1988(H7N9))]	ENSP00000303830|INSR	1	GO:0005975|carbohydrate metabolic process
H7N9|>gi|115278578|gb|ABI84697.1| neuraminidase [Influenza A virus (A/turkey/Minnesota/1/1988(H7N9))]	ENSP00000303960|ABCC8	1	GO:0005975|carbohydrate metabolic process
H7N9|>gi|115278578|gb|ABI84697.1| neuraminidase [Influenza A virus (A/turkey/Minnesota/1/1988(H7N9))]	ENSP00000304440|HAS3	1	GO:0005975|carbohydrate metabolic process
H7N9|>gi|115278578|gb|ABI84697.1| neuraminidase [Influenza A virus (A/turkey/Minnesota/1/1988(H7N9))]	ENSP00000304811|UGT2B7	1	GO:0005975|carbohydrate metabolic process
H7N9|>gi|115278578|gb|ABI84697.1| neuraminidase [Influenza A virus (A/turkey/Minnesota/1/1988(H7N9))]	ENSP00000304845|UGT1A1	1	GO:0005975|carbohydrate metabolic process
H7N9|>gi|115278578|gb|ABI84697.1| neuraminidase [Influenza A virus (A/turkey/Minnesota/1/1988(H7N9))]	ENSP00000305221|UGT2B4	1	GO:0005975|carbohydrate metabolic process
H7N9|>gi|115278578|gb|ABI84697.1| neuraminidase [Influenza A virus (A/turkey/Minnesota/1/1988(H7N9))]	ENSP00000305503|NUP62	1	GO:0005975|carbohydrate metabolic process
H7N9|>gi|115278578|gb|ABI84697.1| neuraminidase [Influenza A virus (A/turkey/Minnesota/1/1988(H7N9))]	ENSP00000305692|GAA	1	GO:0005975|carbohydrate metabolic process
H7N9|>gi|115278578|gb|ABI84697.1| neuraminidase [Influenza A virus (A/turkey/Minnesota/1/1988(H7N9))]	ENSP00000305920|GLB1	1	GO:0005975|carbohydrate metabolic process
H7N9|>gi|115278578|gb|ABI84697.1| neuraminidase [Influenza A virus (A/turkey/Minnesota/1/1988(H7N9))]	ENSP00000305922|FGGY	1	GO:0005975|carbohydrate metabolic process
H7N9|>gi|115278578|gb|ABI84697.1| neuraminidase [Influenza A virus (A/turkey/Minnesota/1/1988(H7N9))]	ENSP00000306459|B4GALT6	1	GO:0005975|carbohydrate metabolic process
H7N9|>gi|115278578|gb|ABI84697.1| neuraminidase [Influenza A virus (A/turkey/Minnesota/1/1988(H7N9))]	ENSP00000306920|GLB1	1	GO:0005975|carbohydrate metabolic process
H7N9|>gi|115278578|gb|ABI84697.1| neuraminidase [Influenza A virus (A/turkey/Minnesota/1/1988(H7N9))]	ENSP00000307875|B3GAT1	1	GO:0005975|carbohydrate metabolic process
H7N9|>gi|115278578|gb|ABI84697.1| neuraminidase [Influenza A virus (A/turkey/Minnesota/1/1988(H7N9))]	ENSP00000307911|CHST2	1	GO:0005975|carbohydrate metabolic process
H7N9|>gi|115278578|gb|ABI84697.1| neuraminidase [Influenza A virus (A/turkey/Minnesota/1/1988(H7N9))]	ENSP00000308107|HPSE	1	GO:0005975|carbohydrate metabolic process
H7N9|>gi|115278578|gb|ABI84697.1| neuraminidase [Influenza A virus (A/turkey/Minnesota/1/1988(H7N9))]	ENSP00000309270|CHST1	1	GO:0005975|carbohydrate metabolic process
H7N9|>gi|115278578|gb|ABI84697.1| neuraminidase [Influenza A virus (A/turkey/Minnesota/1/1988(H7N9))]	ENSP00000309438|PFKM	1	GO:0005975|carbohydrate metabolic process
H7N9|>gi|115278578|gb|ABI84697.1| neuraminidase [Influenza A virus (A/turkey/Minnesota/1/1988(H7N9))]	ENSP00000309591|PRKACA	1	GO:0005975|carbohydrate metabolic process
H7N9|>gi|115278578|gb|ABI84697.1| neuraminidase [Influenza A virus (A/turkey/Minnesota/1/1988(H7N9))]	ENSP00000310668|NUP93	1	GO:0005975|carbohydrate metabolic process
H7N9|>gi|115278578|gb|ABI84697.1| neuraminidase [Influenza A virus (A/turkey/Minnesota/1/1988(H7N9))]	ENSP00000310696|B4GALT2	1	GO:0005975|carbohydrate metabolic process
H7N9|>gi|115278578|gb|ABI84697.1| neuraminidase [Influenza A virus (A/turkey/Minnesota/1/1988(H7N9))]	ENSP00000310998|NAGPA	1	GO:0005975|carbohydrate metabolic process
H7N9|>gi|115278578|gb|ABI84697.1| neuraminidase [Influenza A virus (A/turkey/Minnesota/1/1988(H7N9))]	ENSP00000311648|UGT8	1	GO:0005975|carbohydrate metabolic process
H7N9|>gi|115278578|gb|ABI84697.1| neuraminidase [Influenza A virus (A/turkey/Minnesota/1/1988(H7N9))]	ENSP00000311876|GNPDA1	1	GO:0005975|carbohydrate metabolic process
H7N9|>gi|115278578|gb|ABI84697.1| neuraminidase [Influenza A virus (A/turkey/Minnesota/1/1988(H7N9))]	ENSP00000311888|MGAT1	1	GO:0005975|carbohydrate metabolic process
H7N9|>gi|115278578|gb|ABI84697.1| neuraminidase [Influenza A virus (A/turkey/Minnesota/1/1988(H7N9))]	ENSP00000312021|FUT1	1	GO:0005975|carbohydrate metabolic process
H7N9|>gi|115278578|gb|ABI84697.1| neuraminidase [Influenza A virus (A/turkey/Minnesota/1/1988(H7N9))]	ENSP00000312250|ADPGK	1	GO:0005975|carbohydrate metabolic process
H7N9|>gi|115278578|gb|ABI84697.1| neuraminidase [Influenza A virus (A/turkey/Minnesota/1/1988(H7N9))]	ENSP00000313504|PHKB	1	GO:0005975|carbohydrate metabolic process
H7N9|>gi|115278578|gb|ABI84697.1| neuraminidase [Influenza A virus (A/turkey/Minnesota/1/1988(H7N9))]	ENSP00000314508|GBA	1	GO:0005975|carbohydrate metabolic process
H7N9|>gi|115278578|gb|ABI84697.1| neuraminidase [Influenza A virus (A/turkey/Minnesota/1/1988(H7N9))]	ENSP00000316032|NUP98	1	GO:0005975|carbohydrate metabolic process
H7N9|>gi|115278578|gb|ABI84697.1| neuraminidase [Influenza A virus (A/turkey/Minnesota/1/1988(H7N9))]	ENSP00000316632|GALK2	1	GO:0005975|carbohydrate metabolic process
H7N9|>gi|115278578|gb|ABI84697.1| neuraminidase [Influenza A virus (A/turkey/Minnesota/1/1988(H7N9))]	ENSP00000317027|GCNT4	1	GO:0005975|carbohydrate metabolic process
H7N9|>gi|115278578|gb|ABI84697.1| neuraminidase [Influenza A virus (A/turkey/Minnesota/1/1988(H7N9))]	ENSP00000317904|GYS1	1	GO:0005975|carbohydrate metabolic process
H7N9|>gi|115278578|gb|ABI84697.1| neuraminidase [Influenza A virus (A/turkey/Minnesota/1/1988(H7N9))]	ENSP00000318192|MPI	1	GO:0005975|carbohydrate metabolic process
H7N9|>gi|115278578|gb|ABI84697.1| neuraminidase [Influenza A virus (A/turkey/Minnesota/1/1988(H7N9))]	ENSP00000318318|MPI	1	GO:0005975|carbohydrate metabolic process
H7N9|>gi|115278578|gb|ABI84697.1| neuraminidase [Influenza A virus (A/turkey/Minnesota/1/1988(H7N9))]	ENSP00000319814|PCK1	1	GO:0005975|carbohydrate metabolic process
H7N9|>gi|115278578|gb|ABI84697.1| neuraminidase [Influenza A virus (A/turkey/Minnesota/1/1988(H7N9))]	ENSP00000320171|PKM	1	GO:0005975|carbohydrate metabolic process
H7N9|>gi|115278578|gb|ABI84697.1| neuraminidase [Influenza A virus (A/turkey/Minnesota/1/1988(H7N9))]	ENSP00000320318|NEU4	1	GO:0004308|exo-alpha-sialidase activity
H7N9|>gi|115278578|gb|ABI84697.1| neuraminidase [Influenza A virus (A/turkey/Minnesota/1/1988(H7N9))]	ENSP00000320401|UGT2B17	1	GO:0005975|carbohydrate metabolic process
H7N9|>gi|115278578|gb|ABI84697.1| neuraminidase [Influenza A virus (A/turkey/Minnesota/1/1988(H7N9))]	ENSP00000320935|SLC2A4	1	GO:0005975|carbohydrate metabolic process
H7N9|>gi|115278578|gb|ABI84697.1| neuraminidase [Influenza A virus (A/turkey/Minnesota/1/1988(H7N9))]	ENSP00000320965|B4GALT3	1	GO:0005975|carbohydrate metabolic process
H7N9|>gi|115278578|gb|ABI84697.1| neuraminidase [Influenza A virus (A/turkey/Minnesota/1/1988(H7N9))]	ENSP00000321259|TALDO1	1	GO:0005975|carbohydrate metabolic process
H7N9|>gi|115278578|gb|ABI84697.1| neuraminidase [Influenza A virus (A/turkey/Minnesota/1/1988(H7N9))]	ENSP00000321343|ST8SIA5	1	GO:0005975|carbohydrate metabolic process
H7N9|>gi|115278578|gb|ABI84697.1| neuraminidase [Influenza A virus (A/turkey/Minnesota/1/1988(H7N9))]	ENSP00000323353|UEVLD	1	GO:0005975|carbohydrate metabolic process
H7N9|>gi|115278578|gb|ABI84697.1| neuraminidase [Influenza A virus (A/turkey/Minnesota/1/1988(H7N9))]	ENSP00000323568|SLC2A2	1	GO:0005975|carbohydrate metabolic process
H7N9|>gi|115278578|gb|ABI84697.1| neuraminidase [Influenza A virus (A/turkey/Minnesota/1/1988(H7N9))]	ENSP00000324105|ENO3	1	GO:0005975|carbohydrate metabolic process
H7N9|>gi|115278578|gb|ABI84697.1| neuraminidase [Influenza A virus (A/turkey/Minnesota/1/1988(H7N9))]	ENSP00000324821|CHID1	1	GO:0005975|carbohydrate metabolic process
H7N9|>gi|115278578|gb|ABI84697.1| neuraminidase [Influenza A virus (A/turkey/Minnesota/1/1988(H7N9))]	ENSP00000325055|CHID1	1	GO:0005975|carbohydrate metabolic process
H7N9|>gi|115278578|gb|ABI84697.1| neuraminidase [Influenza A virus (A/turkey/Minnesota/1/1988(H7N9))]	ENSP00000326227|GANC	1	GO:0005975|carbohydrate metabolic process
H7N9|>gi|115278578|gb|ABI84697.1| neuraminidase [Influenza A virus (A/turkey/Minnesota/1/1988(H7N9))]	ENSP00000326674|PIGQ	1	GO:0005975|carbohydrate metabolic process
H7N9|>gi|115278578|gb|ABI84697.1| neuraminidase [Influenza A virus (A/turkey/Minnesota/1/1988(H7N9))]	ENSP00000327070|MDH2	1	GO:0005975|carbohydrate metabolic process
H7N9|>gi|115278578|gb|ABI84697.1| neuraminidase [Influenza A virus (A/turkey/Minnesota/1/1988(H7N9))]	ENSP00000327943|SLC5A2	1	GO:0005975|carbohydrate metabolic process
H7N9|>gi|115278578|gb|ABI84697.1| neuraminidase [Influenza A virus (A/turkey/Minnesota/1/1988(H7N9))]	ENSP00000328403|SLC25A10	1	GO:0005975|carbohydrate metabolic process
H7N9|>gi|115278578|gb|ABI84697.1| neuraminidase [Influenza A virus (A/turkey/Minnesota/1/1988(H7N9))]	ENSP00000328983|CHST6	1	GO:0005975|carbohydrate metabolic process
H7N9|>gi|115278578|gb|ABI84697.1| neuraminidase [Influenza A virus (A/turkey/Minnesota/1/1988(H7N9))]	ENSP00000329968|PHKG2	1	GO:0005975|carbohydrate metabolic process
H7N9|>gi|115278578|gb|ABI84697.1| neuraminidase [Influenza A virus (A/turkey/Minnesota/1/1988(H7N9))]	ENSP00000330484|AMY1B	1	GO:0005975|carbohydrate metabolic process
H7N9|>gi|115278578|gb|ABI84697.1| neuraminidase [Influenza A virus (A/turkey/Minnesota/1/1988(H7N9))]	ENSP00000330601|HHIPL1	1	GO:0005975|carbohydrate metabolic process
H7N9|>gi|115278578|gb|ABI84697.1| neuraminidase [Influenza A virus (A/turkey/Minnesota/1/1988(H7N9))]	ENSP00000330918|PGP	1	GO:0005975|carbohydrate metabolic process
H7N9|>gi|115278578|gb|ABI84697.1| neuraminidase [Influenza A virus (A/turkey/Minnesota/1/1988(H7N9))]	ENSP00000331664|MGAT4C	1	GO:0005975|carbohydrate metabolic process
H7N9|>gi|115278578|gb|ABI84697.1| neuraminidase [Influenza A virus (A/turkey/Minnesota/1/1988(H7N9))]	ENSP00000331897|IDH2	1	GO:0005975|carbohydrate metabolic process
H7N9|>gi|115278578|gb|ABI84697.1| neuraminidase [Influenza A virus (A/turkey/Minnesota/1/1988(H7N9))]	ENSP00000332073|MGAT1	1	GO:0005975|carbohydrate metabolic process
H7N9|>gi|115278578|gb|ABI84697.1| neuraminidase [Influenza A virus (A/turkey/Minnesota/1/1988(H7N9))]	ENSP00000332634|HEXDC	1	GO:0005975|carbohydrate metabolic process
H7N9|>gi|115278578|gb|ABI84697.1| neuraminidase [Influenza A virus (A/turkey/Minnesota/1/1988(H7N9))]	ENSP00000334276|UGT2B28	1	GO:0005975|carbohydrate metabolic process
H7N9|>gi|115278578|gb|ABI84697.1| neuraminidase [Influenza A virus (A/turkey/Minnesota/1/1988(H7N9))]	ENSP00000334983|PKM	1	GO:0005975|carbohydrate metabolic process
H7N9|>gi|115278578|gb|ABI84697.1| neuraminidase [Influenza A virus (A/turkey/Minnesota/1/1988(H7N9))]	ENSP00000336927|ALDOA	1	GO:0005975|carbohydrate metabolic process
H7N9|>gi|115278578|gb|ABI84697.1| neuraminidase [Influenza A virus (A/turkey/Minnesota/1/1988(H7N9))]	ENSP00000337425|HYAL3	1	GO:0005975|carbohydrate metabolic process
H7N9|>gi|115278578|gb|ABI84697.1| neuraminidase [Influenza A virus (A/turkey/Minnesota/1/1988(H7N9))]	ENSP00000337854|HEXDC	1	GO:0005975|carbohydrate metabolic process
H7N9|>gi|115278578|gb|ABI84697.1| neuraminidase [Influenza A virus (A/turkey/Minnesota/1/1988(H7N9))]	ENSP00000338009|GCK	1	GO:0005975|carbohydrate metabolic process
H7N9|>gi|115278578|gb|ABI84697.1| neuraminidase [Influenza A virus (A/turkey/Minnesota/1/1988(H7N9))]	ENSP00000338487|MGAT4B	1	GO:0005975|carbohydrate metabolic process
H7N9|>gi|115278578|gb|ABI84697.1| neuraminidase [Influenza A virus (A/turkey/Minnesota/1/1988(H7N9))]	ENSP00000338703|UGP2	1	GO:0005975|carbohydrate metabolic process
H7N9|>gi|115278578|gb|ABI84697.1| neuraminidase [Influenza A virus (A/turkey/Minnesota/1/1988(H7N9))]	ENSP00000338783|CHST5	1	GO:0005975|carbohydrate metabolic process
H7N9|>gi|115278578|gb|ABI84697.1| neuraminidase [Influenza A virus (A/turkey/Minnesota/1/1988(H7N9))]	ENSP00000338838|CHID1	1	GO:0005975|carbohydrate metabolic process
H7N9|>gi|115278578|gb|ABI84697.1| neuraminidase [Influenza A virus (A/turkey/Minnesota/1/1988(H7N9))]	ENSP00000338970|CHIA	1	GO:0005975|carbohydrate metabolic process
H7N9|>gi|115278578|gb|ABI84697.1| neuraminidase [Influenza A virus (A/turkey/Minnesota/1/1988(H7N9))]	ENSP00000339933|PKLR	1	GO:0005975|carbohydrate metabolic process
H7N9|>gi|115278578|gb|ABI84697.1| neuraminidase [Influenza A virus (A/turkey/Minnesota/1/1988(H7N9))]	ENSP00000340466|GANAB	1	GO:0005975|carbohydrate metabolic process
H7N9|>gi|115278578|gb|ABI84697.1| neuraminidase [Influenza A virus (A/turkey/Minnesota/1/1988(H7N9))]	ENSP00000340734|GUSB	1	GO:0005975|carbohydrate metabolic process
H7N9|>gi|115278578|gb|ABI84697.1| neuraminidase [Influenza A virus (A/turkey/Minnesota/1/1988(H7N9))]	ENSP00000340736|GYG1	1	GO:0005975|carbohydrate metabolic process
H7N9|>gi|115278578|gb|ABI84697.1| neuraminidase [Influenza A virus (A/turkey/Minnesota/1/1988(H7N9))]	ENSP00000340815|SLC3A2	1	GO:0005975|carbohydrate metabolic process
H7N9|>gi|115278578|gb|ABI84697.1| neuraminidase [Influenza A virus (A/turkey/Minnesota/1/1988(H7N9))]	ENSP00000340940|PRKACA	1	GO:0005975|carbohydrate metabolic process
H7N9|>gi|115278578|gb|ABI84697.1| neuraminidase [Influenza A virus (A/turkey/Minnesota/1/1988(H7N9))]	ENSP00000341045|UGT2B15	1	GO:0005975|carbohydrate metabolic process
H7N9|>gi|115278578|gb|ABI84697.1| neuraminidase [Influenza A virus (A/turkey/Minnesota/1/1988(H7N9))]	ENSP00000341206|CHST4	1	GO:0005975|carbohydrate metabolic process
H7N9|>gi|115278578|gb|ABI84697.1| neuraminidase [Influenza A virus (A/turkey/Minnesota/1/1988(H7N9))]	ENSP00000341273|GYG2	1	GO:0005975|carbohydrate metabolic process
H7N9|>gi|115278578|gb|ABI84697.1| neuraminidase [Influenza A virus (A/turkey/Minnesota/1/1988(H7N9))]	ENSP00000341562|B4GALNT1	1	GO:0005975|carbohydrate metabolic process
H7N9|>gi|115278578|gb|ABI84697.1| neuraminidase [Influenza A virus (A/turkey/Minnesota/1/1988(H7N9))]	ENSP00000341828|CHIA	1	GO:0005975|carbohydrate metabolic process
H7N9|>gi|115278578|gb|ABI84697.1| neuraminidase [Influenza A virus (A/turkey/Minnesota/1/1988(H7N9))]	ENSP00000342032|BPGM	1	GO:0005975|carbohydrate metabolic process
H7N9|>gi|115278578|gb|ABI84697.1| neuraminidase [Influenza A virus (A/turkey/Minnesota/1/1988(H7N9))]	ENSP00000342056|CS	1	GO:0005975|carbohydrate metabolic process
H7N9|>gi|115278578|gb|ABI84697.1| neuraminidase [Influenza A virus (A/turkey/Minnesota/1/1988(H7N9))]	ENSP00000342118|HHIPL2	1	GO:0005975|carbohydrate metabolic process
H7N9|>gi|115278578|gb|ABI84697.1| neuraminidase [Influenza A virus (A/turkey/Minnesota/1/1988(H7N9))]	ENSP00000342262|NUP43	1	GO:0005975|carbohydrate metabolic process
H7N9|>gi|115278578|gb|ABI84697.1| neuraminidase [Influenza A virus (A/turkey/Minnesota/1/1988(H7N9))]	ENSP00000342469|PHKA1	1	GO:0005975|carbohydrate metabolic process
H7N9|>gi|115278578|gb|ABI84697.1| neuraminidase [Influenza A virus (A/turkey/Minnesota/1/1988(H7N9))]	ENSP00000342838|INSR	1	GO:0005975|carbohydrate metabolic process
H7N9|>gi|115278578|gb|ABI84697.1| neuraminidase [Influenza A virus (A/turkey/Minnesota/1/1988(H7N9))]	ENSP00000343034|POMT1	1	GO:0005975|carbohydrate metabolic process
H7N9|>gi|115278578|gb|ABI84697.1| neuraminidase [Influenza A virus (A/turkey/Minnesota/1/1988(H7N9))]	ENSP00000343490|LCTL	1	GO:0005975|carbohydrate metabolic process
H7N9|>gi|115278578|gb|ABI84697.1| neuraminidase [Influenza A virus (A/turkey/Minnesota/1/1988(H7N9))]	ENSP00000343782|ADRB3	1	GO:0005975|carbohydrate metabolic process
H7N9|>gi|115278578|gb|ABI84697.1| neuraminidase [Influenza A virus (A/turkey/Minnesota/1/1988(H7N9))]	ENSP00000343838|UGT1A10	1	GO:0005975|carbohydrate metabolic process
H7N9|>gi|115278578|gb|ABI84697.1| neuraminidase [Influenza A virus (A/turkey/Minnesota/1/1988(H7N9))]	ENSP00000344052|NUP54	1	GO:0005975|carbohydrate metabolic process
H7N9|>gi|115278578|gb|ABI84697.1| neuraminidase [Influenza A virus (A/turkey/Minnesota/1/1988(H7N9))]	ENSP00000344338|DPM3	1	GO:0005975|carbohydrate metabolic process
H7N9|>gi|115278578|gb|ABI84697.1| neuraminidase [Influenza A virus (A/turkey/Minnesota/1/1988(H7N9))]	ENSP00000344659|GLB1L2	1	GO:0005975|carbohydrate metabolic process
H7N9|>gi|115278578|gb|ABI84697.1| neuraminidase [Influenza A virus (A/turkey/Minnesota/1/1988(H7N9))]	ENSP00000345580|SLC25A10	1	GO:0005975|carbohydrate metabolic process
H7N9|>gi|115278578|gb|ABI84697.1| neuraminidase [Influenza A virus (A/turkey/Minnesota/1/1988(H7N9))]	ENSP00000345771|PFKM	1	GO:0005975|carbohydrate metabolic process
H7N9|>gi|115278578|gb|ABI84697.1| neuraminidase [Influenza A virus (A/turkey/Minnesota/1/1988(H7N9))]	ENSP00000345849|SPAM1	1	GO:0005975|carbohydrate metabolic process
H7N9|>gi|115278578|gb|ABI84697.1| neuraminidase [Influenza A virus (A/turkey/Minnesota/1/1988(H7N9))]	ENSP00000345895|NUP50	1	GO:0005975|carbohydrate metabolic process
H7N9|>gi|115278578|gb|ABI84697.1| neuraminidase [Influenza A virus (A/turkey/Minnesota/1/1988(H7N9))]	ENSP00000346068|HYAL1	1	GO:0005975|carbohydrate metabolic process
H7N9|>gi|115278578|gb|ABI84697.1| neuraminidase [Influenza A virus (A/turkey/Minnesota/1/1988(H7N9))]	ENSP00000346501|RPE	1	GO:0005975|carbohydrate metabolic process
H7N9|>gi|115278578|gb|ABI84697.1| neuraminidase [Influenza A virus (A/turkey/Minnesota/1/1988(H7N9))]	ENSP00000346643|HKDC1	1	GO:0005975|carbohydrate metabolic process
H7N9|>gi|115278578|gb|ABI84697.1| neuraminidase [Influenza A virus (A/turkey/Minnesota/1/1988(H7N9))]	ENSP00000346748|POMT1	1	GO:0005975|carbohydrate metabolic process
H7N9|>gi|115278578|gb|ABI84697.1| neuraminidase [Influenza A virus (A/turkey/Minnesota/1/1988(H7N9))]	ENSP00000346768|UGT1A9	1	GO:0005975|carbohydrate metabolic process
H7N9|>gi|115278578|gb|ABI84697.1| neuraminidase [Influenza A virus (A/turkey/Minnesota/1/1988(H7N9))]	ENSP00000347404|NUP98	1	GO:0005975|carbohydrate metabolic process
H7N9|>gi|115278578|gb|ABI84697.1| neuraminidase [Influenza A virus (A/turkey/Minnesota/1/1988(H7N9))]	ENSP00000348628|GLB1L	1	GO:0005975|carbohydrate metabolic process
H7N9|>gi|115278578|gb|ABI84697.1| neuraminidase [Influenza A virus (A/turkey/Minnesota/1/1988(H7N9))]	ENSP00000348877|GPI	1	GO:0005975|carbohydrate metabolic process
H7N9|>gi|115278578|gb|ABI84697.1| neuraminidase [Influenza A virus (A/turkey/Minnesota/1/1988(H7N9))]	ENSP00000349053|GANAB	1	GO:0005975|carbohydrate metabolic process
H7N9|>gi|115278578|gb|ABI84697.1| neuraminidase [Influenza A virus (A/turkey/Minnesota/1/1988(H7N9))]	ENSP00000349293|B4GALT2	1	GO:0005975|carbohydrate metabolic process
H7N9|>gi|115278578|gb|ABI84697.1| neuraminidase [Influenza A virus (A/turkey/Minnesota/1/1988(H7N9))]	ENSP00000349467|CALM1	1	GO:0005975|carbohydrate metabolic process
H7N9|>gi|115278578|gb|ABI84697.1| neuraminidase [Influenza A virus (A/turkey/Minnesota/1/1988(H7N9))]	ENSP00000349757|HHIPL1	1	GO:0005975|carbohydrate metabolic process
H7N9|>gi|115278578|gb|ABI84697.1| neuraminidase [Influenza A virus (A/turkey/Minnesota/1/1988(H7N9))]	ENSP00000349860|GFPT1	1	GO:0005975|carbohydrate metabolic process
H7N9|>gi|115278578|gb|ABI84697.1| neuraminidase [Influenza A virus (A/turkey/Minnesota/1/1988(H7N9))]	ENSP00000350387|HYAL2	1	GO:0005975|carbohydrate metabolic process
H7N9|>gi|115278578|gb|ABI84697.1| neuraminidase [Influenza A virus (A/turkey/Minnesota/1/1988(H7N9))]	ENSP00000351124|POM121	1	GO:0005975|carbohydrate metabolic process
H7N9|>gi|115278578|gb|ABI84697.1| neuraminidase [Influenza A virus (A/turkey/Minnesota/1/1988(H7N9))]	ENSP00000351288|PFKFB3	1	GO:0005975|carbohydrate metabolic process
H7N9|>gi|115278578|gb|ABI84697.1| neuraminidase [Influenza A virus (A/turkey/Minnesota/1/1988(H7N9))]	ENSP00000351602|FUT4	1	GO:0005975|carbohydrate metabolic process
H7N9|>gi|115278578|gb|ABI84697.1| neuraminidase [Influenza A virus (A/turkey/Minnesota/1/1988(H7N9))]	ENSP00000351706|GK2	1	GO:0005975|carbohydrate metabolic process
H7N9|>gi|115278578|gb|ABI84697.1| neuraminidase [Influenza A virus (A/turkey/Minnesota/1/1988(H7N9))]	ENSP00000351946|HYAL3	1	GO:0005975|carbohydrate metabolic process
H7N9|>gi|115278578|gb|ABI84697.1| neuraminidase [Influenza A virus (A/turkey/Minnesota/1/1988(H7N9))]	ENSP00000352091|NUP98	1	GO:0005975|carbohydrate metabolic process
H7N9|>gi|115278578|gb|ABI84697.1| neuraminidase [Influenza A virus (A/turkey/Minnesota/1/1988(H7N9))]	ENSP00000352144|B4GALT4	1	GO:0005975|carbohydrate metabolic process
H7N9|>gi|115278578|gb|ABI84697.1| neuraminidase [Influenza A virus (A/turkey/Minnesota/1/1988(H7N9))]	ENSP00000352398|HK1	1	GO:0005975|carbohydrate metabolic process
H7N9|>gi|115278578|gb|ABI84697.1| neuraminidase [Influenza A virus (A/turkey/Minnesota/1/1988(H7N9))]	ENSP00000352400|NUP214	1	GO:0005975|carbohydrate metabolic process
H7N9|>gi|115278578|gb|ABI84697.1| neuraminidase [Influenza A virus (A/turkey/Minnesota/1/1988(H7N9))]	ENSP00000352401|RPE	1	GO:0005975|carbohydrate metabolic process
H7N9|>gi|115278578|gb|ABI84697.1| neuraminidase [Influenza A virus (A/turkey/Minnesota/1/1988(H7N9))]	ENSP00000352842|PFKM	1	GO:0005975|carbohydrate metabolic process
H7N9|>gi|115278578|gb|ABI84697.1| neuraminidase [Influenza A virus (A/turkey/Minnesota/1/1988(H7N9))]	ENSP00000353433|HK1	1	GO:0005975|carbohydrate metabolic process
H7N9|>gi|115278578|gb|ABI84697.1| neuraminidase [Influenza A virus (A/turkey/Minnesota/1/1988(H7N9))]	ENSP00000353593|UGT1A1	1	GO:0005975|carbohydrate metabolic process
H7N9|>gi|115278578|gb|ABI84697.1| neuraminidase [Influenza A virus (A/turkey/Minnesota/1/1988(H7N9))]	ENSP00000353655|MAN2A2	1	GO:0005975|carbohydrate metabolic process
H7N9|>gi|115278578|gb|ABI84697.1| neuraminidase [Influenza A virus (A/turkey/Minnesota/1/1988(H7N9))]	ENSP00000353712|PFKFB3	1	GO:0005975|carbohydrate metabolic process
H7N9|>gi|115278578|gb|ABI84697.1| neuraminidase [Influenza A virus (A/turkey/Minnesota/1/1988(H7N9))]	ENSP00000354347|GFPT1	1	GO:0005975|carbohydrate metabolic process
H7N9|>gi|115278578|gb|ABI84697.1| neuraminidase [Influenza A virus (A/turkey/Minnesota/1/1988(H7N9))]	ENSP00000354610|AMY2B	1	GO:0005975|carbohydrate metabolic process
H7N9|>gi|115278578|gb|ABI84697.1| neuraminidase [Influenza A virus (A/turkey/Minnesota/1/1988(H7N9))]	ENSP00000354635|AGL	1	GO:0005975|carbohydrate metabolic process
H7N9|>gi|115278578|gb|ABI84697.1| neuraminidase [Influenza A virus (A/turkey/Minnesota/1/1988(H7N9))]	ENSP00000354971|AGL	1	GO:0005975|carbohydrate metabolic process
H7N9|>gi|115278578|gb|ABI84697.1| neuraminidase [Influenza A virus (A/turkey/Minnesota/1/1988(H7N9))]	ENSP00000355106|AGL	1	GO:0005975|carbohydrate metabolic process
H7N9|>gi|115278578|gb|ABI84697.1| neuraminidase [Influenza A virus (A/turkey/Minnesota/1/1988(H7N9))]	ENSP00000355273|ST6GAL2	1	GO:0005975|carbohydrate metabolic process
H7N9|>gi|115278578|gb|ABI84697.1| neuraminidase [Influenza A virus (A/turkey/Minnesota/1/1988(H7N9))]	ENSP00000355279|CNOT7	1	GO:0005975|carbohydrate metabolic process
H7N9|>gi|115278578|gb|ABI84697.1| neuraminidase [Influenza A virus (A/turkey/Minnesota/1/1988(H7N9))]	ENSP00000356046|PFKFB2	1	GO:0005975|carbohydrate metabolic process
H7N9|>gi|115278578|gb|ABI84697.1| neuraminidase [Influenza A virus (A/turkey/Minnesota/1/1988(H7N9))]	ENSP00000356047|PFKFB2	1	GO:0005975|carbohydrate metabolic process
H7N9|>gi|115278578|gb|ABI84697.1| neuraminidase [Influenza A virus (A/turkey/Minnesota/1/1988(H7N9))]	ENSP00000356198|CHIT1	1	GO:0005975|carbohydrate metabolic process
H7N9|>gi|115278578|gb|ABI84697.1| neuraminidase [Influenza A virus (A/turkey/Minnesota/1/1988(H7N9))]	ENSP00000356448|TPR	1	GO:0005975|carbohydrate metabolic process
H7N9|>gi|115278578|gb|ABI84697.1| neuraminidase [Influenza A virus (A/turkey/Minnesota/1/1988(H7N9))]	ENSP00000356557|FUCA2	1	GO:0005975|carbohydrate metabolic process
H7N9|>gi|115278578|gb|ABI84697.1| neuraminidase [Influenza A virus (A/turkey/Minnesota/1/1988(H7N9))]	ENSP00000356977|B4GALT3	1	GO:0005975|carbohydrate metabolic process
H7N9|>gi|115278578|gb|ABI84697.1| neuraminidase [Influenza A virus (A/turkey/Minnesota/1/1988(H7N9))]	ENSP00000357357|GBA	1	GO:0005975|carbohydrate metabolic process
H7N9|>gi|115278578|gb|ABI84697.1| neuraminidase [Influenza A virus (A/turkey/Minnesota/1/1988(H7N9))]	ENSP00000357384|DPM3	1	GO:0005975|carbohydrate metabolic process
H7N9|>gi|115278578|gb|ABI84697.1| neuraminidase [Influenza A virus (A/turkey/Minnesota/1/1988(H7N9))]	ENSP00000357385|DPM3	1	GO:0005975|carbohydrate metabolic process
H7N9|>gi|115278578|gb|ABI84697.1| neuraminidase [Influenza A virus (A/turkey/Minnesota/1/1988(H7N9))]	ENSP00000358565|SLC35A1	1	GO:0005975|carbohydrate metabolic process
H7N9|>gi|115278578|gb|ABI84697.1| neuraminidase [Influenza A virus (A/turkey/Minnesota/1/1988(H7N9))]	ENSP00000358569|SLC35A1	1	GO:0005975|carbohydrate metabolic process
H7N9|>gi|115278578|gb|ABI84697.1| neuraminidase [Influenza A virus (A/turkey/Minnesota/1/1988(H7N9))]	ENSP00000358633|G6PD	1	GO:0005975|carbohydrate metabolic process
H7N9|>gi|115278578|gb|ABI84697.1| neuraminidase [Influenza A virus (A/turkey/Minnesota/1/1988(H7N9))]	ENSP00000358719|ME1	1	GO:0005975|carbohydrate metabolic process
H7N9|>gi|115278578|gb|ABI84697.1| neuraminidase [Influenza A virus (A/turkey/Minnesota/1/1988(H7N9))]	ENSP00000358747|OVGP1	1	GO:0005975|carbohydrate metabolic process
H7N9|>gi|115278578|gb|ABI84697.1| neuraminidase [Influenza A virus (A/turkey/Minnesota/1/1988(H7N9))]	ENSP00000358755|CHIA	1	GO:0005975|carbohydrate metabolic process
H7N9|>gi|115278578|gb|ABI84697.1| neuraminidase [Influenza A virus (A/turkey/Minnesota/1/1988(H7N9))]	ENSP00000358759|CHI3L2	1	GO:0005975|carbohydrate metabolic process
H7N9|>gi|115278578|gb|ABI84697.1| neuraminidase [Influenza A virus (A/turkey/Minnesota/1/1988(H7N9))]	ENSP00000358763|CHI3L2	1	GO:0005975|carbohydrate metabolic process
H7N9|>gi|115278578|gb|ABI84697.1| neuraminidase [Influenza A virus (A/turkey/Minnesota/1/1988(H7N9))]	ENSP00000359096|AMY1C	1	GO:0005975|carbohydrate metabolic process
H7N9|>gi|115278578|gb|ABI84697.1| neuraminidase [Influenza A virus (A/turkey/Minnesota/1/1988(H7N9))]	ENSP00000359097|AMY1B	1	GO:0005975|carbohydrate metabolic process
H7N9|>gi|115278578|gb|ABI84697.1| neuraminidase [Influenza A virus (A/turkey/Minnesota/1/1988(H7N9))]	ENSP00000359100|AMY1A	1	GO:0005975|carbohydrate metabolic process
H7N9|>gi|115278578|gb|ABI84697.1| neuraminidase [Influenza A virus (A/turkey/Minnesota/1/1988(H7N9))]	ENSP00000359180|AGL	1	GO:0005975|carbohydrate metabolic process
H7N9|>gi|115278578|gb|ABI84697.1| neuraminidase [Influenza A virus (A/turkey/Minnesota/1/1988(H7N9))]	ENSP00000359182|AGL	1	GO:0005975|carbohydrate metabolic process
H7N9|>gi|115278578|gb|ABI84697.1| neuraminidase [Influenza A virus (A/turkey/Minnesota/1/1988(H7N9))]	ENSP00000359184|AGL	1	GO:0005975|carbohydrate metabolic process
H7N9|>gi|115278578|gb|ABI84697.1| neuraminidase [Influenza A virus (A/turkey/Minnesota/1/1988(H7N9))]	ENSP00000359539|GOT1	1	GO:0005975|carbohydrate metabolic process
H7N9|>gi|115278578|gb|ABI84697.1| neuraminidase [Influenza A virus (A/turkey/Minnesota/1/1988(H7N9))]	ENSP00000359577|HPSE2	1	GO:0005975|carbohydrate metabolic process
H7N9|>gi|115278578|gb|ABI84697.1| neuraminidase [Influenza A virus (A/turkey/Minnesota/1/1988(H7N9))]	ENSP00000359580|HPSE2	1	GO:0005975|carbohydrate metabolic process
H7N9|>gi|115278578|gb|ABI84697.1| neuraminidase [Influenza A virus (A/turkey/Minnesota/1/1988(H7N9))]	ENSP00000359583|HPSE2	1	GO:0005975|carbohydrate metabolic process
H7N9|>gi|115278578|gb|ABI84697.1| neuraminidase [Influenza A virus (A/turkey/Minnesota/1/1988(H7N9))]	ENSP00000359664|CTBS	1	GO:0005975|carbohydrate metabolic process
H7N9|>gi|115278578|gb|ABI84697.1| neuraminidase [Influenza A virus (A/turkey/Minnesota/1/1988(H7N9))]	ENSP00000359716|PRKACB	1	GO:0005975|carbohydrate metabolic process
H7N9|>gi|115278578|gb|ABI84697.1| neuraminidase [Influenza A virus (A/turkey/Minnesota/1/1988(H7N9))]	ENSP00000359719|PRKACB	1	GO:0005975|carbohydrate metabolic process
H7N9|>gi|115278578|gb|ABI84697.1| neuraminidase [Influenza A virus (A/turkey/Minnesota/1/1988(H7N9))]	ENSP00000359722|PRKACB	1	GO:0005975|carbohydrate metabolic process
H7N9|>gi|115278578|gb|ABI84697.1| neuraminidase [Influenza A virus (A/turkey/Minnesota/1/1988(H7N9))]	ENSP00000359723|PRKACB	1	GO:0005975|carbohydrate metabolic process
H7N9|>gi|115278578|gb|ABI84697.1| neuraminidase [Influenza A virus (A/turkey/Minnesota/1/1988(H7N9))]	ENSP00000359991|PGAM1	1	GO:0005975|carbohydrate metabolic process
H7N9|>gi|115278578|gb|ABI84697.1| neuraminidase [Influenza A virus (A/turkey/Minnesota/1/1988(H7N9))]	ENSP00000360124|PGM1	1	GO:0005975|carbohydrate metabolic process
H7N9|>gi|115278578|gb|ABI84697.1| neuraminidase [Influenza A virus (A/turkey/Minnesota/1/1988(H7N9))]	ENSP00000360125|PGM1	1	GO:0005975|carbohydrate metabolic process
H7N9|>gi|115278578|gb|ABI84697.1| neuraminidase [Influenza A virus (A/turkey/Minnesota/1/1988(H7N9))]	ENSP00000360254|FGGY	1	GO:0005975|carbohydrate metabolic process
H7N9|>gi|115278578|gb|ABI84697.1| neuraminidase [Influenza A virus (A/turkey/Minnesota/1/1988(H7N9))]	ENSP00000360256|FGGY	1	GO:0005975|carbohydrate metabolic process
H7N9|>gi|115278578|gb|ABI84697.1| neuraminidase [Influenza A virus (A/turkey/Minnesota/1/1988(H7N9))]	ENSP00000360262|FGGY	1	GO:0005975|carbohydrate metabolic process
H7N9|>gi|115278578|gb|ABI84697.1| neuraminidase [Influenza A virus (A/turkey/Minnesota/1/1988(H7N9))]	ENSP00000360286|RAE1	1	GO:0005975|carbohydrate metabolic process
H7N9|>gi|115278578|gb|ABI84697.1| neuraminidase [Influenza A virus (A/turkey/Minnesota/1/1988(H7N9))]	ENSP00000360776|B4GALT5	1	GO:0005975|carbohydrate metabolic process
H7N9|>gi|115278578|gb|ABI84697.1| neuraminidase [Influenza A virus (A/turkey/Minnesota/1/1988(H7N9))]	ENSP00000360829|GLT6D1	1	GO:0005975|carbohydrate metabolic process
H7N9|>gi|115278578|gb|ABI84697.1| neuraminidase [Influenza A virus (A/turkey/Minnesota/1/1988(H7N9))]	ENSP00000361047|ALG13	1	GO:0005975|carbohydrate metabolic process
H7N9|>gi|115278578|gb|ABI84697.1| neuraminidase [Influenza A virus (A/turkey/Minnesota/1/1988(H7N9))]	ENSP00000361106|GBGT1	1	GO:0005975|carbohydrate metabolic process
H7N9|>gi|115278578|gb|ABI84697.1| neuraminidase [Influenza A virus (A/turkey/Minnesota/1/1988(H7N9))]	ENSP00000361108|GBGT1	1	GO:0005975|carbohydrate metabolic process
H7N9|>gi|115278578|gb|ABI84697.1| neuraminidase [Influenza A virus (A/turkey/Minnesota/1/1988(H7N9))]	ENSP00000361110|GBGT1	1	GO:0005975|carbohydrate metabolic process
H7N9|>gi|115278578|gb|ABI84697.1| neuraminidase [Influenza A virus (A/turkey/Minnesota/1/1988(H7N9))]	ENSP00000361113|GBGT1	1	GO:0005975|carbohydrate metabolic process
H7N9|>gi|115278578|gb|ABI84697.1| neuraminidase [Influenza A virus (A/turkey/Minnesota/1/1988(H7N9))]	ENSP00000361302|POMT1	1	GO:0005975|carbohydrate metabolic process
H7N9|>gi|115278578|gb|ABI84697.1| neuraminidase [Influenza A virus (A/turkey/Minnesota/1/1988(H7N9))]	ENSP00000361399|B4GALT2	1	GO:0005975|carbohydrate metabolic process
H7N9|>gi|115278578|gb|ABI84697.1| neuraminidase [Influenza A virus (A/turkey/Minnesota/1/1988(H7N9))]	ENSP00000361512|PRPS1	1	GO:0005975|carbohydrate metabolic process
H7N9|>gi|115278578|gb|ABI84697.1| neuraminidase [Influenza A virus (A/turkey/Minnesota/1/1988(H7N9))]	ENSP00000361658|NUP188	1	GO:0005975|carbohydrate metabolic process
H7N9|>gi|115278578|gb|ABI84697.1| neuraminidase [Influenza A virus (A/turkey/Minnesota/1/1988(H7N9))]	ENSP00000362207|CHST3	1	GO:0005975|carbohydrate metabolic process
H7N9|>gi|115278578|gb|ABI84697.1| neuraminidase [Influenza A virus (A/turkey/Minnesota/1/1988(H7N9))]	ENSP00000362413|PGK1	1	GO:0005975|carbohydrate metabolic process
H7N9|>gi|115278578|gb|ABI84697.1| neuraminidase [Influenza A virus (A/turkey/Minnesota/1/1988(H7N9))]	ENSP00000362463|GLO1	1	GO:0005975|carbohydrate metabolic process
H7N9|>gi|115278578|gb|ABI84697.1| neuraminidase [Influenza A virus (A/turkey/Minnesota/1/1988(H7N9))]	ENSP00000362469|SLC2A8	1	GO:0005975|carbohydrate metabolic process
H7N9|>gi|115278578|gb|ABI84697.1| neuraminidase [Influenza A virus (A/turkey/Minnesota/1/1988(H7N9))]	ENSP00000362508|UGT1A4	1	GO:0005975|carbohydrate metabolic process
H7N9|>gi|115278578|gb|ABI84697.1| neuraminidase [Influenza A virus (A/turkey/Minnesota/1/1988(H7N9))]	ENSP00000362513|UGT1A5	1	GO:0005975|carbohydrate metabolic process
H7N9|>gi|115278578|gb|ABI84697.1| neuraminidase [Influenza A virus (A/turkey/Minnesota/1/1988(H7N9))]	ENSP00000362523|UGT1A6	1	GO:0005975|carbohydrate metabolic process
H7N9|>gi|115278578|gb|ABI84697.1| neuraminidase [Influenza A virus (A/turkey/Minnesota/1/1988(H7N9))]	ENSP00000362525|UGT1A7	1	GO:0005975|carbohydrate metabolic process
H7N9|>gi|115278578|gb|ABI84697.1| neuraminidase [Influenza A virus (A/turkey/Minnesota/1/1988(H7N9))]	ENSP00000362544|UGT1A10	1	GO:0005975|carbohydrate metabolic process
H7N9|>gi|115278578|gb|ABI84697.1| neuraminidase [Influenza A virus (A/turkey/Minnesota/1/1988(H7N9))]	ENSP00000362549|UGT1A8	1	GO:0005975|carbohydrate metabolic process
H7N9|>gi|115278578|gb|ABI84697.1| neuraminidase [Influenza A virus (A/turkey/Minnesota/1/1988(H7N9))]	ENSP00000362643|PHKA1	1	GO:0005975|carbohydrate metabolic process
H7N9|>gi|115278578|gb|ABI84697.1| neuraminidase [Influenza A virus (A/turkey/Minnesota/1/1988(H7N9))]	ENSP00000363533|MDH1B	1	GO:0005975|carbohydrate metabolic process
H7N9|>gi|115278578|gb|ABI84697.1| neuraminidase [Influenza A virus (A/turkey/Minnesota/1/1988(H7N9))]	ENSP00000363603|FUCA1	1	GO:0005975|carbohydrate metabolic process
H7N9|>gi|115278578|gb|ABI84697.1| neuraminidase [Influenza A virus (A/turkey/Minnesota/1/1988(H7N9))]	ENSP00000363621|GALE	1	GO:0005975|carbohydrate metabolic process
H7N9|>gi|115278578|gb|ABI84697.1| neuraminidase [Influenza A virus (A/turkey/Minnesota/1/1988(H7N9))]	ENSP00000363988|ALDOB	1	GO:0005975|carbohydrate metabolic process
H7N9|>gi|115278578|gb|ABI84697.1| neuraminidase [Influenza A virus (A/turkey/Minnesota/1/1988(H7N9))]	ENSP00000364145|PFKFB1	1	GO:0005975|carbohydrate metabolic process
H7N9|>gi|115278578|gb|ABI84697.1| neuraminidase [Influenza A virus (A/turkey/Minnesota/1/1988(H7N9))]	ENSP00000364475|FBP1	1	GO:0005975|carbohydrate metabolic process
H7N9|>gi|115278578|gb|ABI84697.1| neuraminidase [Influenza A virus (A/turkey/Minnesota/1/1988(H7N9))]	ENSP00000364486|FBP2	1	GO:0005975|carbohydrate metabolic process
H7N9|>gi|115278578|gb|ABI84697.1| neuraminidase [Influenza A virus (A/turkey/Minnesota/1/1988(H7N9))]	ENSP00000364512|G6PC2	1	GO:0005975|carbohydrate metabolic process
H7N9|>gi|115278578|gb|ABI84697.1| neuraminidase [Influenza A virus (A/turkey/Minnesota/1/1988(H7N9))]	ENSP00000364782|NEU1	1	GO:0004308|exo-alpha-sialidase activity
H7N9|>gi|115278578|gb|ABI84697.1| neuraminidase [Influenza A virus (A/turkey/Minnesota/1/1988(H7N9))]	ENSP00000365601|IDNK	1	GO:0005975|carbohydrate metabolic process
H7N9|>gi|115278578|gb|ABI84697.1| neuraminidase [Influenza A virus (A/turkey/Minnesota/1/1988(H7N9))]	ENSP00000366488|PRKACG	1	GO:0005975|carbohydrate metabolic process
H7N9|>gi|115278578|gb|ABI84697.1| neuraminidase [Influenza A virus (A/turkey/Minnesota/1/1988(H7N9))]	ENSP00000366549|ST3GAL5	1	GO:0005975|carbohydrate metabolic process
H7N9|>gi|115278578|gb|ABI84697.1| neuraminidase [Influenza A virus (A/turkey/Minnesota/1/1988(H7N9))]	ENSP00000366620|H6PD	1	GO:0005975|carbohydrate metabolic process
H7N9|>gi|115278578|gb|ABI84697.1| neuraminidase [Influenza A virus (A/turkey/Minnesota/1/1988(H7N9))]	ENSP00000366631|SLC2A5	1	GO:0005975|carbohydrate metabolic process
H7N9|>gi|115278578|gb|ABI84697.1| neuraminidase [Influenza A virus (A/turkey/Minnesota/1/1988(H7N9))]	ENSP00000366641|SLC2A5	1	GO:0005975|carbohydrate metabolic process
H7N9|>gi|115278578|gb|ABI84697.1| neuraminidase [Influenza A virus (A/turkey/Minnesota/1/1988(H7N9))]	ENSP00000366650|PYGM	1	GO:0005975|carbohydrate metabolic process
H7N9|>gi|115278578|gb|ABI84697.1| neuraminidase [Influenza A virus (A/turkey/Minnesota/1/1988(H7N9))]	ENSP00000366927|ALDH1B1	1	GO:0005975|carbohydrate metabolic process
H7N9|>gi|115278578|gb|ABI84697.1| neuraminidase [Influenza A virus (A/turkey/Minnesota/1/1988(H7N9))]	ENSP00000367121|SLC3A2	1	GO:0005975|carbohydrate metabolic process
H7N9|>gi|115278578|gb|ABI84697.1| neuraminidase [Influenza A virus (A/turkey/Minnesota/1/1988(H7N9))]	ENSP00000367122|SLC3A2	1	GO:0005975|carbohydrate metabolic process
H7N9|>gi|115278578|gb|ABI84697.1| neuraminidase [Influenza A virus (A/turkey/Minnesota/1/1988(H7N9))]	ENSP00000367123|SLC3A2	1	GO:0005975|carbohydrate metabolic process
H7N9|>gi|115278578|gb|ABI84697.1| neuraminidase [Influenza A virus (A/turkey/Minnesota/1/1988(H7N9))]	ENSP00000367124|SLC3A2	1	GO:0005975|carbohydrate metabolic process
H7N9|>gi|115278578|gb|ABI84697.1| neuraminidase [Influenza A virus (A/turkey/Minnesota/1/1988(H7N9))]	ENSP00000367721|NUP160	1	GO:0005975|carbohydrate metabolic process
H7N9|>gi|115278578|gb|ABI84697.1| neuraminidase [Influenza A virus (A/turkey/Minnesota/1/1988(H7N9))]	ENSP00000368119|GALT	1	GO:0005975|carbohydrate metabolic process
H7N9|>gi|115278578|gb|ABI84697.1| neuraminidase [Influenza A virus (A/turkey/Minnesota/1/1988(H7N9))]	ENSP00000368221|GK	1	GO:0005975|carbohydrate metabolic process
H7N9|>gi|115278578|gb|ABI84697.1| neuraminidase [Influenza A virus (A/turkey/Minnesota/1/1988(H7N9))]	ENSP00000368224|GK	1	GO:0005975|carbohydrate metabolic process
H7N9|>gi|115278578|gb|ABI84697.1| neuraminidase [Influenza A virus (A/turkey/Minnesota/1/1988(H7N9))]	ENSP00000368226|GK	1	GO:0005975|carbohydrate metabolic process
H7N9|>gi|115278578|gb|ABI84697.1| neuraminidase [Influenza A virus (A/turkey/Minnesota/1/1988(H7N9))]	ENSP00000368228|GK	1	GO:0005975|carbohydrate metabolic process
H7N9|>gi|115278578|gb|ABI84697.1| neuraminidase [Influenza A virus (A/turkey/Minnesota/1/1988(H7N9))]	ENSP00000368229|GK	1	GO:0005975|carbohydrate metabolic process
H7N9|>gi|115278578|gb|ABI84697.1| neuraminidase [Influenza A virus (A/turkey/Minnesota/1/1988(H7N9))]	ENSP00000368437|KIAA1161	1	GO:0005975|carbohydrate metabolic process
H7N9|>gi|115278578|gb|ABI84697.1| neuraminidase [Influenza A virus (A/turkey/Minnesota/1/1988(H7N9))]	ENSP00000368697|UEVLD	1	GO:0005975|carbohydrate metabolic process
H7N9|>gi|115278578|gb|ABI84697.1| neuraminidase [Influenza A virus (A/turkey/Minnesota/1/1988(H7N9))]	ENSP00000368722|LDHA	1	GO:0005975|carbohydrate metabolic process
H7N9|>gi|115278578|gb|ABI84697.1| neuraminidase [Influenza A virus (A/turkey/Minnesota/1/1988(H7N9))]	ENSP00000369055|B4GALT1	1	GO:0005975|carbohydrate metabolic process
H7N9|>gi|115278578|gb|ABI84697.1| neuraminidase [Influenza A virus (A/turkey/Minnesota/1/1988(H7N9))]	ENSP00000369100|PFKFB3	1	GO:0005975|carbohydrate metabolic process
H7N9|>gi|115278578|gb|ABI84697.1| neuraminidase [Influenza A virus (A/turkey/Minnesota/1/1988(H7N9))]	ENSP00000369274|PHKA2	1	GO:0005975|carbohydrate metabolic process
H7N9|>gi|115278578|gb|ABI84697.1| neuraminidase [Influenza A virus (A/turkey/Minnesota/1/1988(H7N9))]	ENSP00000369442|KL	1	GO:0005975|carbohydrate metabolic process
H7N9|>gi|115278578|gb|ABI84697.1| neuraminidase [Influenza A virus (A/turkey/Minnesota/1/1988(H7N9))]	ENSP00000370486|UGT2B4	1	GO:0005975|carbohydrate metabolic process
H7N9|>gi|115278578|gb|ABI84697.1| neuraminidase [Influenza A virus (A/turkey/Minnesota/1/1988(H7N9))]	ENSP00000370517|PFKP	1	GO:0005975|carbohydrate metabolic process
H7N9|>gi|115278578|gb|ABI84697.1| neuraminidase [Influenza A virus (A/turkey/Minnesota/1/1988(H7N9))]	ENSP00000370549|GYG2	1	GO:0005975|carbohydrate metabolic process
H7N9|>gi|115278578|gb|ABI84697.1| neuraminidase [Influenza A virus (A/turkey/Minnesota/1/1988(H7N9))]	ENSP00000370555|GYG2	1	GO:0005975|carbohydrate metabolic process
H7N9|>gi|115278578|gb|ABI84697.1| neuraminidase [Influenza A virus (A/turkey/Minnesota/1/1988(H7N9))]	ENSP00000371155|NUPL1	1	GO:0005975|carbohydrate metabolic process
H7N9|>gi|115278578|gb|ABI84697.1| neuraminidase [Influenza A virus (A/turkey/Minnesota/1/1988(H7N9))]	ENSP00000371265|NUP155	1	GO:0005975|carbohydrate metabolic process
H7N9|>gi|115278578|gb|ABI84697.1| neuraminidase [Influenza A virus (A/turkey/Minnesota/1/1988(H7N9))]	ENSP00000371381|NAGPA	1	GO:0005975|carbohydrate metabolic process
H7N9|>gi|115278578|gb|ABI84697.1| neuraminidase [Influenza A virus (A/turkey/Minnesota/1/1988(H7N9))]	ENSP00000371393|PGM2	1	GO:0005975|carbohydrate metabolic process
H7N9|>gi|115278578|gb|ABI84697.1| neuraminidase [Influenza A virus (A/turkey/Minnesota/1/1988(H7N9))]	ENSP00000372613|B4GALT6	1	GO:0005975|carbohydrate metabolic process
H7N9|>gi|115278578|gb|ABI84697.1| neuraminidase [Influenza A virus (A/turkey/Minnesota/1/1988(H7N9))]	ENSP00000373745|PKM	1	GO:0005975|carbohydrate metabolic process
H7N9|>gi|115278578|gb|ABI84697.1| neuraminidase [Influenza A virus (A/turkey/Minnesota/1/1988(H7N9))]	ENSP00000374467|ABCC8	1	GO:0005975|carbohydrate metabolic process
H7N9|>gi|115278578|gb|ABI84697.1| neuraminidase [Influenza A virus (A/turkey/Minnesota/1/1988(H7N9))]	ENSP00000374531|GLB1L2	1	GO:0005975|carbohydrate metabolic process
H7N9|>gi|115278578|gb|ABI84697.1| neuraminidase [Influenza A virus (A/turkey/Minnesota/1/1988(H7N9))]	ENSP00000374537|GLB1L3	1	GO:0005975|carbohydrate metabolic process
H7N9|>gi|115278578|gb|ABI84697.1| neuraminidase [Influenza A virus (A/turkey/Minnesota/1/1988(H7N9))]	ENSP00000374665|GAA	1	GO:0005975|carbohydrate metabolic process
H7N9|>gi|115278578|gb|ABI84697.1| neuraminidase [Influenza A virus (A/turkey/Minnesota/1/1988(H7N9))]	ENSP00000375079|CHST6	1	GO:0005975|carbohydrate metabolic process
H7N9|>gi|115278578|gb|ABI84697.1| neuraminidase [Influenza A virus (A/turkey/Minnesota/1/1988(H7N9))]	ENSP00000375748|FUT2	1	GO:0005975|carbohydrate metabolic process
H7N9|>gi|115278578|gb|ABI84697.1| neuraminidase [Influenza A virus (A/turkey/Minnesota/1/1988(H7N9))]	ENSP00000375785|CALM3	1	GO:0005975|carbohydrate metabolic process
H7N9|>gi|115278578|gb|ABI84697.1| neuraminidase [Influenza A virus (A/turkey/Minnesota/1/1988(H7N9))]	ENSP00000375830|NEU4	1	GO:0004308|exo-alpha-sialidase activity
H7N9|>gi|115278578|gb|ABI84697.1| neuraminidase [Influenza A virus (A/turkey/Minnesota/1/1988(H7N9))]	ENSP00000375939|GLB1L	1	GO:0005975|carbohydrate metabolic process
H7N9|>gi|115278578|gb|ABI84697.1| neuraminidase [Influenza A virus (A/turkey/Minnesota/1/1988(H7N9))]	ENSP00000376049|MDH1B	1	GO:0005975|carbohydrate metabolic process
H7N9|>gi|115278578|gb|ABI84697.1| neuraminidase [Influenza A virus (A/turkey/Minnesota/1/1988(H7N9))]	ENSP00000376214|PKLR	1	GO:0005975|carbohydrate metabolic process
H7N9|>gi|115278578|gb|ABI84697.1| neuraminidase [Influenza A virus (A/turkey/Minnesota/1/1988(H7N9))]	ENSP00000376359|B3GAT1	1	GO:0005975|carbohydrate metabolic process
H7N9|>gi|115278578|gb|ABI84697.1| neuraminidase [Influenza A virus (A/turkey/Minnesota/1/1988(H7N9))]	ENSP00000376465|GALNT3	1	GO:0005975|carbohydrate metabolic process
H7N9|>gi|115278578|gb|ABI84697.1| neuraminidase [Influenza A virus (A/turkey/Minnesota/1/1988(H7N9))]	ENSP00000376548|GALNTL5	1	GO:0005975|carbohydrate metabolic process
H7N9|>gi|115278578|gb|ABI84697.1| neuraminidase [Influenza A virus (A/turkey/Minnesota/1/1988(H7N9))]	ENSP00000376840|BPGM	1	GO:0005975|carbohydrate metabolic process
H7N9|>gi|115278578|gb|ABI84697.1| neuraminidase [Influenza A virus (A/turkey/Minnesota/1/1988(H7N9))]	ENSP00000376900|MGAT4C	1	GO:0005975|carbohydrate metabolic process
H7N9|>gi|115278578|gb|ABI84697.1| neuraminidase [Influenza A virus (A/turkey/Minnesota/1/1988(H7N9))]	ENSP00000377010|MGAT1	1	GO:0005975|carbohydrate metabolic process
H7N9|>gi|115278578|gb|ABI84697.1| neuraminidase [Influenza A virus (A/turkey/Minnesota/1/1988(H7N9))]	ENSP00000377127|MGAT4A	1	GO:0005975|carbohydrate metabolic process
H7N9|>gi|115278578|gb|ABI84697.1| neuraminidase [Influenza A virus (A/turkey/Minnesota/1/1988(H7N9))]	ENSP00000377192|G6PD	1	GO:0005975|carbohydrate metabolic process
H7N9|>gi|115278578|gb|ABI84697.1| neuraminidase [Influenza A virus (A/turkey/Minnesota/1/1988(H7N9))]	ENSP00000377194|G6PD	1	GO:0005975|carbohydrate metabolic process
H7N9|>gi|115278578|gb|ABI84697.1| neuraminidase [Influenza A virus (A/turkey/Minnesota/1/1988(H7N9))]	ENSP00000377198|GALC	1	GO:0005975|carbohydrate metabolic process
H7N9|>gi|115278578|gb|ABI84697.1| neuraminidase [Influenza A virus (A/turkey/Minnesota/1/1988(H7N9))]	ENSP00000377199|GALC	1	GO:0005975|carbohydrate metabolic process
H7N9|>gi|115278578|gb|ABI84697.1| neuraminidase [Influenza A virus (A/turkey/Minnesota/1/1988(H7N9))]	ENSP00000377360|B4GALT4	1	GO:0005975|carbohydrate metabolic process
H7N9|>gi|115278578|gb|ABI84697.1| neuraminidase [Influenza A virus (A/turkey/Minnesota/1/1988(H7N9))]	ENSP00000377394|ST3GAL5	1	GO:0005975|carbohydrate metabolic process
H7N9|>gi|115278578|gb|ABI84697.1| neuraminidase [Influenza A virus (A/turkey/Minnesota/1/1988(H7N9))]	ENSP00000377397|ST3GAL5	1	GO:0005975|carbohydrate metabolic process
H7N9|>gi|115278578|gb|ABI84697.1| neuraminidase [Influenza A virus (A/turkey/Minnesota/1/1988(H7N9))]	ENSP00000377527|PC	1	GO:0005975|carbohydrate metabolic process
H7N9|>gi|115278578|gb|ABI84697.1| neuraminidase [Influenza A virus (A/turkey/Minnesota/1/1988(H7N9))]	ENSP00000377530|PC	1	GO:0005975|carbohydrate metabolic process
H7N9|>gi|115278578|gb|ABI84697.1| neuraminidase [Influenza A virus (A/turkey/Minnesota/1/1988(H7N9))]	ENSP00000377532|PC	1	GO:0005975|carbohydrate metabolic process
H7N9|>gi|115278578|gb|ABI84697.1| neuraminidase [Influenza A virus (A/turkey/Minnesota/1/1988(H7N9))]	ENSP00000377908|AAAS	1	GO:0005975|carbohydrate metabolic process
H7N9|>gi|115278578|gb|ABI84697.1| neuraminidase [Influenza A virus (A/turkey/Minnesota/1/1988(H7N9))]	ENSP00000377939|UGP2	1	GO:0005975|carbohydrate metabolic process
H7N9|>gi|115278578|gb|ABI84697.1| neuraminidase [Influenza A virus (A/turkey/Minnesota/1/1988(H7N9))]	ENSP00000377945|MDH1	1	GO:0005975|carbohydrate metabolic process
H7N9|>gi|115278578|gb|ABI84697.1| neuraminidase [Influenza A virus (A/turkey/Minnesota/1/1988(H7N9))]	ENSP00000377971|ANKLE1	1	GO:0005975|carbohydrate metabolic process
H7N9|>gi|115278578|gb|ABI84697.1| neuraminidase [Influenza A virus (A/turkey/Minnesota/1/1988(H7N9))]	ENSP00000378019|UGT8	1	GO:0005975|carbohydrate metabolic process
H7N9|>gi|115278578|gb|ABI84697.1| neuraminidase [Influenza A virus (A/turkey/Minnesota/1/1988(H7N9))]	ENSP00000378260|ALG13	1	GO:0005975|carbohydrate metabolic process
H7N9|>gi|115278578|gb|ABI84697.1| neuraminidase [Influenza A virus (A/turkey/Minnesota/1/1988(H7N9))]	ENSP00000378314|PRKACB	1	GO:0005975|carbohydrate metabolic process
H7N9|>gi|115278578|gb|ABI84697.1| neuraminidase [Influenza A virus (A/turkey/Minnesota/1/1988(H7N9))]	ENSP00000378521|HKDC1	1	GO:0005975|carbohydrate metabolic process
H7N9|>gi|115278578|gb|ABI84697.1| neuraminidase [Influenza A virus (A/turkey/Minnesota/1/1988(H7N9))]	ENSP00000378571|HYAL2	1	GO:0005975|carbohydrate metabolic process
H7N9|>gi|115278578|gb|ABI84697.1| neuraminidase [Influenza A virus (A/turkey/Minnesota/1/1988(H7N9))]	ENSP00000378575|HYAL1	1	GO:0005975|carbohydrate metabolic process
H7N9|>gi|115278578|gb|ABI84697.1| neuraminidase [Influenza A virus (A/turkey/Minnesota/1/1988(H7N9))]	ENSP00000378576|HYAL1	1	GO:0005975|carbohydrate metabolic process
H7N9|>gi|115278578|gb|ABI84697.1| neuraminidase [Influenza A virus (A/turkey/Minnesota/1/1988(H7N9))]	ENSP00000378656|PFKM	1	GO:0005975|carbohydrate metabolic process
H7N9|>gi|115278578|gb|ABI84697.1| neuraminidase [Influenza A virus (A/turkey/Minnesota/1/1988(H7N9))]	ENSP00000378661|ALDOA	1	GO:0005975|carbohydrate metabolic process
H7N9|>gi|115278578|gb|ABI84697.1| neuraminidase [Influenza A virus (A/turkey/Minnesota/1/1988(H7N9))]	ENSP00000378669|ALDOA	1	GO:0005975|carbohydrate metabolic process
H7N9|>gi|115278578|gb|ABI84697.1| neuraminidase [Influenza A virus (A/turkey/Minnesota/1/1988(H7N9))]	ENSP00000378731|ALDOC	1	GO:0005975|carbohydrate metabolic process
H7N9|>gi|115278578|gb|ABI84697.1| neuraminidase [Influenza A virus (A/turkey/Minnesota/1/1988(H7N9))]	ENSP00000379142|GCK	1	GO:0005975|carbohydrate metabolic process
H7N9|>gi|115278578|gb|ABI84697.1| neuraminidase [Influenza A virus (A/turkey/Minnesota/1/1988(H7N9))]	ENSP00000379181|RAE1	1	GO:0005975|carbohydrate metabolic process
H7N9|>gi|115278578|gb|ABI84697.1| neuraminidase [Influenza A virus (A/turkey/Minnesota/1/1988(H7N9))]	ENSP00000379182|RAE1	1	GO:0005975|carbohydrate metabolic process
H7N9|>gi|115278578|gb|ABI84697.1| neuraminidase [Influenza A virus (A/turkey/Minnesota/1/1988(H7N9))]	ENSP00000379353|ST8SIA1	1	GO:0005975|carbohydrate metabolic process
H7N9|>gi|115278578|gb|ABI84697.1| neuraminidase [Influenza A virus (A/turkey/Minnesota/1/1988(H7N9))]	ENSP00000379377|GCNT3	1	GO:0005975|carbohydrate metabolic process
H7N9|>gi|115278578|gb|ABI84697.1| neuraminidase [Influenza A virus (A/turkey/Minnesota/1/1988(H7N9))]	ENSP00000379385|LDHB	1	GO:0005975|carbohydrate metabolic process
H7N9|>gi|115278578|gb|ABI84697.1| neuraminidase [Influenza A virus (A/turkey/Minnesota/1/1988(H7N9))]	ENSP00000379386|LDHB	1	GO:0005975|carbohydrate metabolic process
H7N9|>gi|115278578|gb|ABI84697.1| neuraminidase [Influenza A virus (A/turkey/Minnesota/1/1988(H7N9))]	ENSP00000379403|NUP50	1	GO:0005975|carbohydrate metabolic process
H7N9|>gi|115278578|gb|ABI84697.1| neuraminidase [Influenza A virus (A/turkey/Minnesota/1/1988(H7N9))]	ENSP00000379500|UEVLD	1	GO:0005975|carbohydrate metabolic process
H7N9|>gi|115278578|gb|ABI84697.1| neuraminidase [Influenza A virus (A/turkey/Minnesota/1/1988(H7N9))]	ENSP00000379516|LDHAL6A	1	GO:0005975|carbohydrate metabolic process
H7N9|>gi|115278578|gb|ABI84697.1| neuraminidase [Influenza A virus (A/turkey/Minnesota/1/1988(H7N9))]	ENSP00000379524|LDHA	1	GO:0005975|carbohydrate metabolic process
H7N9|>gi|115278578|gb|ABI84697.1| neuraminidase [Influenza A virus (A/turkey/Minnesota/1/1988(H7N9))]	ENSP00000379674|PGM5	1	GO:0005975|carbohydrate metabolic process
H7N9|>gi|115278578|gb|ABI84697.1| neuraminidase [Influenza A virus (A/turkey/Minnesota/1/1988(H7N9))]	ENSP00000379678|PGM5	1	GO:0005975|carbohydrate metabolic process
H7N9|>gi|115278578|gb|ABI84697.1| neuraminidase [Influenza A virus (A/turkey/Minnesota/1/1988(H7N9))]	ENSP00000379680|NAGA	1	GO:0005975|carbohydrate metabolic process
H7N9|>gi|115278578|gb|ABI84697.1| neuraminidase [Influenza A virus (A/turkey/Minnesota/1/1988(H7N9))]	ENSP00000379766|GALK2	1	GO:0005975|carbohydrate metabolic process
H7N9|>gi|115278578|gb|ABI84697.1| neuraminidase [Influenza A virus (A/turkey/Minnesota/1/1988(H7N9))]	ENSP00000379933|TPI1	1	GO:0005975|carbohydrate metabolic process
H7N9|>gi|115278578|gb|ABI84697.1| neuraminidase [Influenza A virus (A/turkey/Minnesota/1/1988(H7N9))]	ENSP00000380068|GAPDH	1	GO:0005975|carbohydrate metabolic process
H7N9|>gi|115278578|gb|ABI84697.1| neuraminidase [Influenza A virus (A/turkey/Minnesota/1/1988(H7N9))]	ENSP00000380070|GAPDH	1	GO:0005975|carbohydrate metabolic process
H7N9|>gi|115278578|gb|ABI84697.1| neuraminidase [Influenza A virus (A/turkey/Minnesota/1/1988(H7N9))]	ENSP00000380171|PCK2	1	GO:0005975|carbohydrate metabolic process
H7N9|>gi|115278578|gb|ABI84697.1| neuraminidase [Influenza A virus (A/turkey/Minnesota/1/1988(H7N9))]	ENSP00000380199|NUP98	1	GO:0005975|carbohydrate metabolic process
H7N9|>gi|115278578|gb|ABI84697.1| neuraminidase [Influenza A virus (A/turkey/Minnesota/1/1988(H7N9))]	ENSP00000380202|NUP98	1	GO:0005975|carbohydrate metabolic process
H7N9|>gi|115278578|gb|ABI84697.1| neuraminidase [Influenza A virus (A/turkey/Minnesota/1/1988(H7N9))]	ENSP00000380511|HAGH	1	GO:0005975|carbohydrate metabolic process
H7N9|>gi|115278578|gb|ABI84697.1| neuraminidase [Influenza A virus (A/turkey/Minnesota/1/1988(H7N9))]	ENSP00000380514|HAGH	1	GO:0005975|carbohydrate metabolic process
H7N9|>gi|115278578|gb|ABI84697.1| neuraminidase [Influenza A virus (A/turkey/Minnesota/1/1988(H7N9))]	ENSP00000380780|ATHL1	1	GO:0005975|carbohydrate metabolic process
H7N9|>gi|115278578|gb|ABI84697.1| neuraminidase [Influenza A virus (A/turkey/Minnesota/1/1988(H7N9))]	ENSP00000381786|GYG2	1	GO:0005975|carbohydrate metabolic process
H7N9|>gi|115278578|gb|ABI84697.1| neuraminidase [Influenza A virus (A/turkey/Minnesota/1/1988(H7N9))]	ENSP00000381847|YDJC	1	GO:0005975|carbohydrate metabolic process
H7N9|>gi|115278578|gb|ABI84697.1| neuraminidase [Influenza A virus (A/turkey/Minnesota/1/1988(H7N9))]	ENSP00000382333|GLB1	1	GO:0005975|carbohydrate metabolic process
H7N9|>gi|115278578|gb|ABI84697.1| neuraminidase [Influenza A virus (A/turkey/Minnesota/1/1988(H7N9))]	ENSP00000382779|SEH1L	1	GO:0005975|carbohydrate metabolic process
H7N9|>gi|115278578|gb|ABI84697.1| neuraminidase [Influenza A virus (A/turkey/Minnesota/1/1988(H7N9))]	ENSP00000384008|ANKLE1	1	GO:0005975|carbohydrate metabolic process
H7N9|>gi|115278578|gb|ABI84697.1| neuraminidase [Influenza A virus (A/turkey/Minnesota/1/1988(H7N9))]	ENSP00000384038|PFKL	1	GO:0005975|carbohydrate metabolic process
H7N9|>gi|115278578|gb|ABI84697.1| neuraminidase [Influenza A virus (A/turkey/Minnesota/1/1988(H7N9))]	ENSP00000384247|GCK	1	GO:0005975|carbohydrate metabolic process
H7N9|>gi|115278578|gb|ABI84697.1| neuraminidase [Influenza A virus (A/turkey/Minnesota/1/1988(H7N9))]	ENSP00000384262|HPSE	1	GO:0005975|carbohydrate metabolic process
H7N9|>gi|115278578|gb|ABI84697.1| neuraminidase [Influenza A virus (A/turkey/Minnesota/1/1988(H7N9))]	ENSP00000384384|HPSE2	1	GO:0005975|carbohydrate metabolic process
H7N9|>gi|115278578|gb|ABI84697.1| neuraminidase [Influenza A virus (A/turkey/Minnesota/1/1988(H7N9))]	ENSP00000384408|PARG	1	GO:0005975|carbohydrate metabolic process
H7N9|>gi|115278578|gb|ABI84697.1| neuraminidase [Influenza A virus (A/turkey/Minnesota/1/1988(H7N9))]	ENSP00000384531|POMT1	1	GO:0005975|carbohydrate metabolic process
H7N9|>gi|115278578|gb|ABI84697.1| neuraminidase [Influenza A virus (A/turkey/Minnesota/1/1988(H7N9))]	ENSP00000384603|NAGA	1	GO:0005975|carbohydrate metabolic process
H7N9|>gi|115278578|gb|ABI84697.1| neuraminidase [Influenza A virus (A/turkey/Minnesota/1/1988(H7N9))]	ENSP00000384753|ANKLE1	1	GO:0005975|carbohydrate metabolic process
H7N9|>gi|115278578|gb|ABI84697.1| neuraminidase [Influenza A virus (A/turkey/Minnesota/1/1988(H7N9))]	ENSP00000384774|HK1	1	GO:0005975|carbohydrate metabolic process
H7N9|>gi|115278578|gb|ABI84697.1| neuraminidase [Influenza A virus (A/turkey/Minnesota/1/1988(H7N9))]	ENSP00000384804|NEU4	1	GO:0004308|exo-alpha-sialidase activity
H7N9|>gi|115278578|gb|ABI84697.1| neuraminidase [Influenza A virus (A/turkey/Minnesota/1/1988(H7N9))]	ENSP00000385149|NEU4	1	GO:0004308|exo-alpha-sialidase activity
H7N9|>gi|115278578|gb|ABI84697.1| neuraminidase [Influenza A virus (A/turkey/Minnesota/1/1988(H7N9))]	ENSP00000385283|NAGA	1	GO:0005975|carbohydrate metabolic process
H7N9|>gi|115278578|gb|ABI84697.1| neuraminidase [Influenza A virus (A/turkey/Minnesota/1/1988(H7N9))]	ENSP00000385350|CHI3L1	1	GO:0005975|carbohydrate metabolic process
H7N9|>gi|115278578|gb|ABI84697.1| neuraminidase [Influenza A virus (A/turkey/Minnesota/1/1988(H7N9))]	ENSP00000385402|NEU4	1	GO:0004308|exo-alpha-sialidase activity
H7N9|>gi|115278578|gb|ABI84697.1| neuraminidase [Influenza A virus (A/turkey/Minnesota/1/1988(H7N9))]	ENSP00000385435|GALNT14	1	GO:0005975|carbohydrate metabolic process
H7N9|>gi|115278578|gb|ABI84697.1| neuraminidase [Influenza A virus (A/turkey/Minnesota/1/1988(H7N9))]	ENSP00000385555|NUP50	1	GO:0005975|carbohydrate metabolic process
H7N9|>gi|115278578|gb|ABI84697.1| neuraminidase [Influenza A virus (A/turkey/Minnesota/1/1988(H7N9))]	ENSP00000385797|POMT1	1	GO:0005975|carbohydrate metabolic process
H7N9|>gi|115278578|gb|ABI84697.1| neuraminidase [Influenza A virus (A/turkey/Minnesota/1/1988(H7N9))]	ENSP00000386028|SPAM1	1	GO:0005975|carbohydrate metabolic process
H7N9|>gi|115278578|gb|ABI84697.1| neuraminidase [Influenza A virus (A/turkey/Minnesota/1/1988(H7N9))]	ENSP00000386107|UGT1A6	1	GO:0005975|carbohydrate metabolic process
H7N9|>gi|115278578|gb|ABI84697.1| neuraminidase [Influenza A virus (A/turkey/Minnesota/1/1988(H7N9))]	ENSP00000386194|RPE	1	GO:0005975|carbohydrate metabolic process
H7N9|>gi|115278578|gb|ABI84697.1| neuraminidase [Influenza A virus (A/turkey/Minnesota/1/1988(H7N9))]	ENSP00000386233|GALM	1	GO:0005975|carbohydrate metabolic process
H7N9|>gi|115278578|gb|ABI84697.1| neuraminidase [Influenza A virus (A/turkey/Minnesota/1/1988(H7N9))]	ENSP00000386297|ATHL1	1	GO:0005975|carbohydrate metabolic process
H7N9|>gi|115278578|gb|ABI84697.1| neuraminidase [Influenza A virus (A/turkey/Minnesota/1/1988(H7N9))]	ENSP00000386354|GLB1L	1	GO:0005975|carbohydrate metabolic process
H7N9|>gi|115278578|gb|ABI84697.1| neuraminidase [Influenza A virus (A/turkey/Minnesota/1/1988(H7N9))]	ENSP00000386620|SLC3A1	1	GO:0005975|carbohydrate metabolic process
H7N9|>gi|115278578|gb|ABI84697.1| neuraminidase [Influenza A virus (A/turkey/Minnesota/1/1988(H7N9))]	ENSP00000386677|SLC3A1	1	GO:0005975|carbohydrate metabolic process
H7N9|>gi|115278578|gb|ABI84697.1| neuraminidase [Influenza A virus (A/turkey/Minnesota/1/1988(H7N9))]	ENSP00000386709|SLC3A1	1	GO:0005975|carbohydrate metabolic process
H7N9|>gi|115278578|gb|ABI84697.1| neuraminidase [Influenza A virus (A/turkey/Minnesota/1/1988(H7N9))]	ENSP00000386719|MDH1	1	GO:0005975|carbohydrate metabolic process
H7N9|>gi|115278578|gb|ABI84697.1| neuraminidase [Influenza A virus (A/turkey/Minnesota/1/1988(H7N9))]	ENSP00000386743|MDH1	1	GO:0005975|carbohydrate metabolic process
H7N9|>gi|115278578|gb|ABI84697.1| neuraminidase [Influenza A virus (A/turkey/Minnesota/1/1988(H7N9))]	ENSP00000386760|PIGQ	1	GO:0005975|carbohydrate metabolic process
H7N9|>gi|115278578|gb|ABI84697.1| neuraminidase [Influenza A virus (A/turkey/Minnesota/1/1988(H7N9))]	ENSP00000386841|MGAT4A	1	GO:0005975|carbohydrate metabolic process
H7N9|>gi|115278578|gb|ABI84697.1| neuraminidase [Influenza A virus (A/turkey/Minnesota/1/1988(H7N9))]	ENSP00000386852|SLC3A1	1	GO:0005975|carbohydrate metabolic process
H7N9|>gi|115278578|gb|ABI84697.1| neuraminidase [Influenza A virus (A/turkey/Minnesota/1/1988(H7N9))]	ENSP00000386942|ST6GAL2	1	GO:0005975|carbohydrate metabolic process
H7N9|>gi|115278578|gb|ABI84697.1| neuraminidase [Influenza A virus (A/turkey/Minnesota/1/1988(H7N9))]	ENSP00000386954|SLC3A1	1	GO:0005975|carbohydrate metabolic process
H7N9|>gi|115278578|gb|ABI84697.1| neuraminidase [Influenza A virus (A/turkey/Minnesota/1/1988(H7N9))]	ENSP00000386955|GALNT3	1	GO:0005975|carbohydrate metabolic process
H7N9|>gi|115278578|gb|ABI84697.1| neuraminidase [Influenza A virus (A/turkey/Minnesota/1/1988(H7N9))]	ENSP00000387099|ATHL1	1	GO:0005975|carbohydrate metabolic process
H7N9|>gi|115278578|gb|ABI84697.1| neuraminidase [Influenza A virus (A/turkey/Minnesota/1/1988(H7N9))]	ENSP00000387140|HK2	1	GO:0005975|carbohydrate metabolic process
H7N9|>gi|115278578|gb|ABI84697.1| neuraminidase [Influenza A virus (A/turkey/Minnesota/1/1988(H7N9))]	ENSP00000387185|ATHL1	1	GO:0005975|carbohydrate metabolic process
H7N9|>gi|115278578|gb|ABI84697.1| neuraminidase [Influenza A virus (A/turkey/Minnesota/1/1988(H7N9))]	ENSP00000387308|SLC3A1	1	GO:0005975|carbohydrate metabolic process
H7N9|>gi|115278578|gb|ABI84697.1| neuraminidase [Influenza A virus (A/turkey/Minnesota/1/1988(H7N9))]	ENSP00000387332|ST6GAL2	1	GO:0005975|carbohydrate metabolic process
H7N9|>gi|115278578|gb|ABI84697.1| neuraminidase [Influenza A virus (A/turkey/Minnesota/1/1988(H7N9))]	ENSP00000387337|SLC3A1	1	GO:0005975|carbohydrate metabolic process
H7N9|>gi|115278578|gb|ABI84697.1| neuraminidase [Influenza A virus (A/turkey/Minnesota/1/1988(H7N9))]	ENSP00000387498|FUT2	1	GO:0005975|carbohydrate metabolic process
H7N9|>gi|115278578|gb|ABI84697.1| neuraminidase [Influenza A virus (A/turkey/Minnesota/1/1988(H7N9))]	ENSP00000387671|CHIA	1	GO:0005975|carbohydrate metabolic process
H7N9|>gi|115278578|gb|ABI84697.1| neuraminidase [Influenza A virus (A/turkey/Minnesota/1/1988(H7N9))]	ENSP00000387683|UGT2B11	1	GO:0005975|carbohydrate metabolic process
H7N9|>gi|115278578|gb|ABI84697.1| neuraminidase [Influenza A virus (A/turkey/Minnesota/1/1988(H7N9))]	ENSP00000387703|GLB1L	1	GO:0005975|carbohydrate metabolic process
H7N9|>gi|115278578|gb|ABI84697.1| neuraminidase [Influenza A virus (A/turkey/Minnesota/1/1988(H7N9))]	ENSP00000387718|GNPDA1	1	GO:0005975|carbohydrate metabolic process
H7N9|>gi|115278578|gb|ABI84697.1| neuraminidase [Influenza A virus (A/turkey/Minnesota/1/1988(H7N9))]	ENSP00000387888|UGT2A1	1	GO:0005975|carbohydrate metabolic process
H7N9|>gi|115278578|gb|ABI84697.1| neuraminidase [Influenza A virus (A/turkey/Minnesota/1/1988(H7N9))]	ENSP00000387989|GLB1	1	GO:0005975|carbohydrate metabolic process
H7N9|>gi|115278578|gb|ABI84697.1| neuraminidase [Influenza A virus (A/turkey/Minnesota/1/1988(H7N9))]	ENSP00000387991|NUP62	1	GO:0005975|carbohydrate metabolic process
H7N9|>gi|115278578|gb|ABI84697.1| neuraminidase [Influenza A virus (A/turkey/Minnesota/1/1988(H7N9))]	ENSP00000388156|CHID1	1	GO:0005975|carbohydrate metabolic process
H7N9|>gi|115278578|gb|ABI84697.1| neuraminidase [Influenza A virus (A/turkey/Minnesota/1/1988(H7N9))]	ENSP00000388221|MAN2A2	1	GO:0005975|carbohydrate metabolic process
H7N9|>gi|115278578|gb|ABI84697.1| neuraminidase [Influenza A virus (A/turkey/Minnesota/1/1988(H7N9))]	ENSP00000388571|PHKG2	1	GO:0005975|carbohydrate metabolic process
H7N9|>gi|115278578|gb|ABI84697.1| neuraminidase [Influenza A virus (A/turkey/Minnesota/1/1988(H7N9))]	ENSP00000388658|SLC25A12	1	GO:0005975|carbohydrate metabolic process
H7N9|>gi|115278578|gb|ABI84697.1| neuraminidase [Influenza A virus (A/turkey/Minnesota/1/1988(H7N9))]	ENSP00000388707|NEU4	1	GO:0004308|exo-alpha-sialidase activity
H7N9|>gi|115278578|gb|ABI84697.1| neuraminidase [Influenza A virus (A/turkey/Minnesota/1/1988(H7N9))]	ENSP00000389411|RPE	1	GO:0005975|carbohydrate metabolic process
H7N9|>gi|115278578|gb|ABI84697.1| neuraminidase [Influenza A virus (A/turkey/Minnesota/1/1988(H7N9))]	ENSP00000389686|POC1B-GALNT4	1	GO:0005975|carbohydrate metabolic process
H7N9|>gi|115278578|gb|ABI84697.1| neuraminidase [Influenza A virus (A/turkey/Minnesota/1/1988(H7N9))]	ENSP00000389916|MDH1B	1	GO:0005975|carbohydrate metabolic process
H7N9|>gi|115278578|gb|ABI84697.1| neuraminidase [Influenza A virus (A/turkey/Minnesota/1/1988(H7N9))]	ENSP00000390149|HYAL1	1	GO:0005975|carbohydrate metabolic process
H7N9|>gi|115278578|gb|ABI84697.1| neuraminidase [Influenza A virus (A/turkey/Minnesota/1/1988(H7N9))]	ENSP00000390219|AMY1B	1	GO:0005975|carbohydrate metabolic process
H7N9|>gi|115278578|gb|ABI84697.1| neuraminidase [Influenza A virus (A/turkey/Minnesota/1/1988(H7N9))]	ENSP00000390476|CHIA	1	GO:0005975|carbohydrate metabolic process
H7N9|>gi|115278578|gb|ABI84697.1| neuraminidase [Influenza A virus (A/turkey/Minnesota/1/1988(H7N9))]	ENSP00000390583|MAN2B1	1	GO:0005975|carbohydrate metabolic process
H7N9|>gi|115278578|gb|ABI84697.1| neuraminidase [Influenza A virus (A/turkey/Minnesota/1/1988(H7N9))]	ENSP00000390832|AMY2A	1	GO:0005975|carbohydrate metabolic process
H7N9|>gi|115278578|gb|ABI84697.1| neuraminidase [Influenza A virus (A/turkey/Minnesota/1/1988(H7N9))]	ENSP00000391132|CHIA	1	GO:0005975|carbohydrate metabolic process
H7N9|>gi|115278578|gb|ABI84697.1| neuraminidase [Influenza A virus (A/turkey/Minnesota/1/1988(H7N9))]	ENSP00000391231|LCT	1	GO:0005975|carbohydrate metabolic process
H7N9|>gi|115278578|gb|ABI84697.1| neuraminidase [Influenza A virus (A/turkey/Minnesota/1/1988(H7N9))]	ENSP00000391255|CHID1	1	GO:0005975|carbohydrate metabolic process
H7N9|>gi|115278578|gb|ABI84697.1| neuraminidase [Influenza A virus (A/turkey/Minnesota/1/1988(H7N9))]	ENSP00000391390|GUSB	1	GO:0005975|carbohydrate metabolic process
H7N9|>gi|115278578|gb|ABI84697.1| neuraminidase [Influenza A virus (A/turkey/Minnesota/1/1988(H7N9))]	ENSP00000391423|AMY2B	1	GO:0005975|carbohydrate metabolic process
H7N9|>gi|115278578|gb|ABI84697.1| neuraminidase [Influenza A virus (A/turkey/Minnesota/1/1988(H7N9))]	ENSP00000391491|SPAM1	1	GO:0005975|carbohydrate metabolic process
H7N9|>gi|115278578|gb|ABI84697.1| neuraminidase [Influenza A virus (A/turkey/Minnesota/1/1988(H7N9))]	ENSP00000391642|SLC3A1	1	GO:0005975|carbohydrate metabolic process
H7N9|>gi|115278578|gb|ABI84697.1| neuraminidase [Influenza A virus (A/turkey/Minnesota/1/1988(H7N9))]	ENSP00000391663|HYAL3	1	GO:0005975|carbohydrate metabolic process
H7N9|>gi|115278578|gb|ABI84697.1| neuraminidase [Influenza A virus (A/turkey/Minnesota/1/1988(H7N9))]	ENSP00000391666|HYAL1	1	GO:0005975|carbohydrate metabolic process
H7N9|>gi|115278578|gb|ABI84697.1| neuraminidase [Influenza A virus (A/turkey/Minnesota/1/1988(H7N9))]	ENSP00000391922|HYAL3	1	GO:0005975|carbohydrate metabolic process
H7N9|>gi|115278578|gb|ABI84697.1| neuraminidase [Influenza A virus (A/turkey/Minnesota/1/1988(H7N9))]	ENSP00000392279|RPE	1	GO:0005975|carbohydrate metabolic process
H7N9|>gi|115278578|gb|ABI84697.1| neuraminidase [Influenza A virus (A/turkey/Minnesota/1/1988(H7N9))]	ENSP00000392464|MDH1B	1	GO:0005975|carbohydrate metabolic process
H7N9|>gi|115278578|gb|ABI84697.1| neuraminidase [Influenza A virus (A/turkey/Minnesota/1/1988(H7N9))]	ENSP00000392582|GALNTL5	1	GO:0005975|carbohydrate metabolic process
H7N9|>gi|115278578|gb|ABI84697.1| neuraminidase [Influenza A virus (A/turkey/Minnesota/1/1988(H7N9))]	ENSP00000393358|HYAL1	1	GO:0005975|carbohydrate metabolic process
H7N9|>gi|115278578|gb|ABI84697.1| neuraminidase [Influenza A virus (A/turkey/Minnesota/1/1988(H7N9))]	ENSP00000393377|GLB1	1	GO:0005975|carbohydrate metabolic process
H7N9|>gi|115278578|gb|ABI84697.1| neuraminidase [Influenza A virus (A/turkey/Minnesota/1/1988(H7N9))]	ENSP00000393399|GALNT11	1	GO:0005975|carbohydrate metabolic process
H7N9|>gi|115278578|gb|ABI84697.1| neuraminidase [Influenza A virus (A/turkey/Minnesota/1/1988(H7N9))]	ENSP00000393584|AMY1B	1	GO:0005975|carbohydrate metabolic process
H7N9|>gi|115278578|gb|ABI84697.1| neuraminidase [Influenza A virus (A/turkey/Minnesota/1/1988(H7N9))]	ENSP00000394151|FUCA2	1	GO:0005975|carbohydrate metabolic process
H7N9|>gi|115278578|gb|ABI84697.1| neuraminidase [Influenza A virus (A/turkey/Minnesota/1/1988(H7N9))]	ENSP00000394372|MAN2A2	1	GO:0005975|carbohydrate metabolic process
H7N9|>gi|115278578|gb|ABI84697.1| neuraminidase [Influenza A virus (A/turkey/Minnesota/1/1988(H7N9))]	ENSP00000394455|RPE	1	GO:0005975|carbohydrate metabolic process
H7N9|>gi|115278578|gb|ABI84697.1| neuraminidase [Influenza A virus (A/turkey/Minnesota/1/1988(H7N9))]	ENSP00000394460|ANKLE1	1	GO:0005975|carbohydrate metabolic process
H7N9|>gi|115278578|gb|ABI84697.1| neuraminidase [Influenza A virus (A/turkey/Minnesota/1/1988(H7N9))]	ENSP00000394526|HYAL1	1	GO:0005975|carbohydrate metabolic process
H7N9|>gi|115278578|gb|ABI84697.1| neuraminidase [Influenza A virus (A/turkey/Minnesota/1/1988(H7N9))]	ENSP00000394769|NEU4	1	GO:0004308|exo-alpha-sialidase activity
H7N9|>gi|115278578|gb|ABI84697.1| neuraminidase [Influenza A virus (A/turkey/Minnesota/1/1988(H7N9))]	ENSP00000394864|PGM5	1	GO:0005975|carbohydrate metabolic process
H7N9|>gi|115278578|gb|ABI84697.1| neuraminidase [Influenza A virus (A/turkey/Minnesota/1/1988(H7N9))]	ENSP00000395337|LDHA	1	GO:0005975|carbohydrate metabolic process
H7N9|>gi|115278578|gb|ABI84697.1| neuraminidase [Influenza A virus (A/turkey/Minnesota/1/1988(H7N9))]	ENSP00000395451|PYGB	1	GO:0005975|carbohydrate metabolic process
H7N9|>gi|115278578|gb|ABI84697.1| neuraminidase [Influenza A virus (A/turkey/Minnesota/1/1988(H7N9))]	ENSP00000395473|MAN2B1	1	GO:0005975|carbohydrate metabolic process
H7N9|>gi|115278578|gb|ABI84697.1| neuraminidase [Influenza A virus (A/turkey/Minnesota/1/1988(H7N9))]	ENSP00000396197|NEU4	1	GO:0004308|exo-alpha-sialidase activity
H7N9|>gi|115278578|gb|ABI84697.1| neuraminidase [Influenza A virus (A/turkey/Minnesota/1/1988(H7N9))]	ENSP00000396458|IDUA	1	GO:0005975|carbohydrate metabolic process
H7N9|>gi|115278578|gb|ABI84697.1| neuraminidase [Influenza A virus (A/turkey/Minnesota/1/1988(H7N9))]	ENSP00000396576|NUP214	1	GO:0005975|carbohydrate metabolic process
H7N9|>gi|115278578|gb|ABI84697.1| neuraminidase [Influenza A virus (A/turkey/Minnesota/1/1988(H7N9))]	ENSP00000396615|GLB1L3	1	GO:0005975|carbohydrate metabolic process
H7N9|>gi|115278578|gb|ABI84697.1| neuraminidase [Influenza A virus (A/turkey/Minnesota/1/1988(H7N9))]	ENSP00000397210|ADPGK	1	GO:0005975|carbohydrate metabolic process
H7N9|>gi|115278578|gb|ABI84697.1| neuraminidase [Influenza A virus (A/turkey/Minnesota/1/1988(H7N9))]	ENSP00000397582|AMY2A	1	GO:0005975|carbohydrate metabolic process
H7N9|>gi|115278578|gb|ABI84697.1| neuraminidase [Influenza A virus (A/turkey/Minnesota/1/1988(H7N9))]	ENSP00000397674|RPE	1	GO:0005975|carbohydrate metabolic process
H7N9|>gi|115278578|gb|ABI84697.1| neuraminidase [Influenza A virus (A/turkey/Minnesota/1/1988(H7N9))]	ENSP00000397694|ADPGK	1	GO:0005975|carbohydrate metabolic process
H7N9|>gi|115278578|gb|ABI84697.1| neuraminidase [Influenza A virus (A/turkey/Minnesota/1/1988(H7N9))]	ENSP00000397860|NEU4	1	GO:0004308|exo-alpha-sialidase activity
H7N9|>gi|115278578|gb|ABI84697.1| neuraminidase [Influenza A virus (A/turkey/Minnesota/1/1988(H7N9))]	ENSP00000397929|GLB1L3	1	GO:0005975|carbohydrate metabolic process
H7N9|>gi|115278578|gb|ABI84697.1| neuraminidase [Influenza A virus (A/turkey/Minnesota/1/1988(H7N9))]	ENSP00000397986|GBA	1	GO:0005975|carbohydrate metabolic process
H7N9|>gi|115278578|gb|ABI84697.1| neuraminidase [Influenza A virus (A/turkey/Minnesota/1/1988(H7N9))]	ENSP00000398026|HEXA	1	GO:0005975|carbohydrate metabolic process
H7N9|>gi|115278578|gb|ABI84697.1| neuraminidase [Influenza A virus (A/turkey/Minnesota/1/1988(H7N9))]	ENSP00000398119|FUCA2	1	GO:0005975|carbohydrate metabolic process
H7N9|>gi|115278578|gb|ABI84697.1| neuraminidase [Influenza A virus (A/turkey/Minnesota/1/1988(H7N9))]	ENSP00000398316|HK1	1	GO:0005975|carbohydrate metabolic process
H7N9|>gi|115278578|gb|ABI84697.1| neuraminidase [Influenza A virus (A/turkey/Minnesota/1/1988(H7N9))]	ENSP00000398571|NEU4	1	GO:0004308|exo-alpha-sialidase activity
H7N9|>gi|115278578|gb|ABI84697.1| neuraminidase [Influenza A virus (A/turkey/Minnesota/1/1988(H7N9))]	ENSP00000398714|HYAL2	1	GO:0005975|carbohydrate metabolic process
H7N9|>gi|115278578|gb|ABI84697.1| neuraminidase [Influenza A virus (A/turkey/Minnesota/1/1988(H7N9))]	ENSP00000398722|CHID1	1	GO:0005975|carbohydrate metabolic process
H7N9|>gi|115278578|gb|ABI84697.1| neuraminidase [Influenza A virus (A/turkey/Minnesota/1/1988(H7N9))]	ENSP00000398845|XYLB	1	GO:0005975|carbohydrate metabolic process
H7N9|>gi|115278578|gb|ABI84697.1| neuraminidase [Influenza A virus (A/turkey/Minnesota/1/1988(H7N9))]	ENSP00000399309|NEU1	1	GO:0004308|exo-alpha-sialidase activity
H7N9|>gi|115278578|gb|ABI84697.1| neuraminidase [Influenza A virus (A/turkey/Minnesota/1/1988(H7N9))]	ENSP00000399463|GCKR	1	GO:0005975|carbohydrate metabolic process
H7N9|>gi|115278578|gb|ABI84697.1| neuraminidase [Influenza A virus (A/turkey/Minnesota/1/1988(H7N9))]	ENSP00000399473|GALM	1	GO:0005975|carbohydrate metabolic process
H7N9|>gi|115278578|gb|ABI84697.1| neuraminidase [Influenza A virus (A/turkey/Minnesota/1/1988(H7N9))]	ENSP00000399513|KL	1	GO:0005975|carbohydrate metabolic process
H7N9|>gi|115278578|gb|ABI84697.1| neuraminidase [Influenza A virus (A/turkey/Minnesota/1/1988(H7N9))]	ENSP00000399557|GANC	1	GO:0005975|carbohydrate metabolic process
H7N9|>gi|115278578|gb|ABI84697.1| neuraminidase [Influenza A virus (A/turkey/Minnesota/1/1988(H7N9))]	ENSP00000399677|HYAL2	1	GO:0005975|carbohydrate metabolic process
H7N9|>gi|115278578|gb|ABI84697.1| neuraminidase [Influenza A virus (A/turkey/Minnesota/1/1988(H7N9))]	ENSP00000399836|AMY1A	1	GO:0005975|carbohydrate metabolic process
H7N9|>gi|115278578|gb|ABI84697.1| neuraminidase [Influenza A virus (A/turkey/Minnesota/1/1988(H7N9))]	ENSP00000399838|BPGM	1	GO:0005975|carbohydrate metabolic process
H7N9|>gi|115278578|gb|ABI84697.1| neuraminidase [Influenza A virus (A/turkey/Minnesota/1/1988(H7N9))]	ENSP00000400101|SLC25A13	1	GO:0005975|carbohydrate metabolic process
H7N9|>gi|115278578|gb|ABI84697.1| neuraminidase [Influenza A virus (A/turkey/Minnesota/1/1988(H7N9))]	ENSP00000400449|RPE	1	GO:0005975|carbohydrate metabolic process
H7N9|>gi|115278578|gb|ABI84697.1| neuraminidase [Influenza A virus (A/turkey/Minnesota/1/1988(H7N9))]	ENSP00000400452|ALDOA	1	GO:0005975|carbohydrate metabolic process
H7N9|>gi|115278578|gb|ABI84697.1| neuraminidase [Influenza A virus (A/turkey/Minnesota/1/1988(H7N9))]	ENSP00000400738|GLB1L	1	GO:0005975|carbohydrate metabolic process
H7N9|>gi|115278578|gb|ABI84697.1| neuraminidase [Influenza A virus (A/turkey/Minnesota/1/1988(H7N9))]	ENSP00000401067|NEU1	1	GO:0004308|exo-alpha-sialidase activity
H7N9|>gi|115278578|gb|ABI84697.1| neuraminidase [Influenza A virus (A/turkey/Minnesota/1/1988(H7N9))]	ENSP00000401092|HYAL3	1	GO:0005975|carbohydrate metabolic process
H7N9|>gi|115278578|gb|ABI84697.1| neuraminidase [Influenza A virus (A/turkey/Minnesota/1/1988(H7N9))]	ENSP00000401541|UGT1A6	1	GO:0005975|carbohydrate metabolic process
H7N9|>gi|115278578|gb|ABI84697.1| neuraminidase [Influenza A virus (A/turkey/Minnesota/1/1988(H7N9))]	ENSP00000401627|AMY2B	1	GO:0005975|carbohydrate metabolic process
H7N9|>gi|115278578|gb|ABI84697.1| neuraminidase [Influenza A virus (A/turkey/Minnesota/1/1988(H7N9))]	ENSP00000401720|GK	1	GO:0005975|carbohydrate metabolic process
H7N9|>gi|115278578|gb|ABI84697.1| neuraminidase [Influenza A virus (A/turkey/Minnesota/1/1988(H7N9))]	ENSP00000401838|RPE	1	GO:0005975|carbohydrate metabolic process
H7N9|>gi|115278578|gb|ABI84697.1| neuraminidase [Influenza A virus (A/turkey/Minnesota/1/1988(H7N9))]	ENSP00000401853|HYAL2	1	GO:0005975|carbohydrate metabolic process
H7N9|>gi|115278578|gb|ABI84697.1| neuraminidase [Influenza A virus (A/turkey/Minnesota/1/1988(H7N9))]	ENSP00000402061|RPE	1	GO:0005975|carbohydrate metabolic process
H7N9|>gi|115278578|gb|ABI84697.1| neuraminidase [Influenza A virus (A/turkey/Minnesota/1/1988(H7N9))]	ENSP00000402103|HK1	1	GO:0005975|carbohydrate metabolic process
H7N9|>gi|115278578|gb|ABI84697.1| neuraminidase [Influenza A virus (A/turkey/Minnesota/1/1988(H7N9))]	ENSP00000402123|SPAM1	1	GO:0005975|carbohydrate metabolic process
H7N9|>gi|115278578|gb|ABI84697.1| neuraminidase [Influenza A virus (A/turkey/Minnesota/1/1988(H7N9))]	ENSP00000402481|YDJC	1	GO:0005975|carbohydrate metabolic process
H7N9|>gi|115278578|gb|ABI84697.1| neuraminidase [Influenza A virus (A/turkey/Minnesota/1/1988(H7N9))]	ENSP00000402577|GBA	1	GO:0005975|carbohydrate metabolic process
H7N9|>gi|115278578|gb|ABI84697.1| neuraminidase [Influenza A virus (A/turkey/Minnesota/1/1988(H7N9))]	ENSP00000402838|MGAT1	1	GO:0005975|carbohydrate metabolic process
H7N9|>gi|115278578|gb|ABI84697.1| neuraminidase [Influenza A virus (A/turkey/Minnesota/1/1988(H7N9))]	ENSP00000402840|GCK	1	GO:0005975|carbohydrate metabolic process
H7N9|>gi|115278578|gb|ABI84697.1| neuraminidase [Influenza A virus (A/turkey/Minnesota/1/1988(H7N9))]	ENSP00000403264|GLB1	1	GO:0005975|carbohydrate metabolic process
H7N9|>gi|115278578|gb|ABI84697.1| neuraminidase [Influenza A virus (A/turkey/Minnesota/1/1988(H7N9))]	ENSP00000403290|IDNK	1	GO:0005975|carbohydrate metabolic process
H7N9|>gi|115278578|gb|ABI84697.1| neuraminidase [Influenza A virus (A/turkey/Minnesota/1/1988(H7N9))]	ENSP00000403365|PKM	1	GO:0005975|carbohydrate metabolic process
H7N9|>gi|115278578|gb|ABI84697.1| neuraminidase [Influenza A virus (A/turkey/Minnesota/1/1988(H7N9))]	ENSP00000403425|FGGY	1	GO:0005975|carbohydrate metabolic process
H7N9|>gi|115278578|gb|ABI84697.1| neuraminidase [Influenza A virus (A/turkey/Minnesota/1/1988(H7N9))]	ENSP00000403720|NEU1	1	GO:0004308|exo-alpha-sialidase activity
H7N9|>gi|115278578|gb|ABI84697.1| neuraminidase [Influenza A virus (A/turkey/Minnesota/1/1988(H7N9))]	ENSP00000403808|RPE	1	GO:0005975|carbohydrate metabolic process
H7N9|>gi|115278578|gb|ABI84697.1| neuraminidase [Influenza A virus (A/turkey/Minnesota/1/1988(H7N9))]	ENSP00000404119|POMT1	1	GO:0005975|carbohydrate metabolic process
H7N9|>gi|115278578|gb|ABI84697.1| neuraminidase [Influenza A virus (A/turkey/Minnesota/1/1988(H7N9))]	ENSP00000404682|GK	1	GO:0005975|carbohydrate metabolic process
H7N9|>gi|115278578|gb|ABI84697.1| neuraminidase [Influenza A virus (A/turkey/Minnesota/1/1988(H7N9))]	ENSP00000404718|MGAT1	1	GO:0005975|carbohydrate metabolic process
H7N9|>gi|115278578|gb|ABI84697.1| neuraminidase [Influenza A virus (A/turkey/Minnesota/1/1988(H7N9))]	ENSP00000404889|MGAT4A	1	GO:0005975|carbohydrate metabolic process
H7N9|>gi|115278578|gb|ABI84697.1| neuraminidase [Influenza A virus (A/turkey/Minnesota/1/1988(H7N9))]	ENSP00000405014|NUP214	1	GO:0005975|carbohydrate metabolic process
H7N9|>gi|115278578|gb|ABI84697.1| neuraminidase [Influenza A virus (A/turkey/Minnesota/1/1988(H7N9))]	ENSP00000405455|TKT	1	GO:0005975|carbohydrate metabolic process
H7N9|>gi|115278578|gb|ABI84697.1| neuraminidase [Influenza A virus (A/turkey/Minnesota/1/1988(H7N9))]	ENSP00000405562|POM121	1	GO:0005975|carbohydrate metabolic process
H7N9|>gi|115278578|gb|ABI84697.1| neuraminidase [Influenza A virus (A/turkey/Minnesota/1/1988(H7N9))]	ENSP00000405573|GPI	1	GO:0005975|carbohydrate metabolic process
H7N9|>gi|115278578|gb|ABI84697.1| neuraminidase [Influenza A virus (A/turkey/Minnesota/1/1988(H7N9))]	ENSP00000405695|RPE	1	GO:0005975|carbohydrate metabolic process
H7N9|>gi|115278578|gb|ABI84697.1| neuraminidase [Influenza A virus (A/turkey/Minnesota/1/1988(H7N9))]	ENSP00000405855|HYAL2	1	GO:0005975|carbohydrate metabolic process
H7N9|>gi|115278578|gb|ABI84697.1| neuraminidase [Influenza A virus (A/turkey/Minnesota/1/1988(H7N9))]	ENSP00000406172|LDHA	1	GO:0005975|carbohydrate metabolic process
H7N9|>gi|115278578|gb|ABI84697.1| neuraminidase [Influenza A virus (A/turkey/Minnesota/1/1988(H7N9))]	ENSP00000406305|GALK1	1	GO:0005975|carbohydrate metabolic process
H7N9|>gi|115278578|gb|ABI84697.1| neuraminidase [Influenza A virus (A/turkey/Minnesota/1/1988(H7N9))]	ENSP00000406607|FGGY	1	GO:0005975|carbohydrate metabolic process
H7N9|>gi|115278578|gb|ABI84697.1| neuraminidase [Influenza A virus (A/turkey/Minnesota/1/1988(H7N9))]	ENSP00000406657|HYAL2	1	GO:0005975|carbohydrate metabolic process
H7N9|>gi|115278578|gb|ABI84697.1| neuraminidase [Influenza A virus (A/turkey/Minnesota/1/1988(H7N9))]	ENSP00000407331|NUP62	1	GO:0005975|carbohydrate metabolic process
H7N9|>gi|115278578|gb|ABI84697.1| neuraminidase [Influenza A virus (A/turkey/Minnesota/1/1988(H7N9))]	ENSP00000407365|GLB1	1	GO:0005975|carbohydrate metabolic process
H7N9|>gi|115278578|gb|ABI84697.1| neuraminidase [Influenza A virus (A/turkey/Minnesota/1/1988(H7N9))]	ENSP00000407468|B4GALT2	1	GO:0005975|carbohydrate metabolic process
H7N9|>gi|115278578|gb|ABI84697.1| neuraminidase [Influenza A virus (A/turkey/Minnesota/1/1988(H7N9))]	ENSP00000408025|FBP1	1	GO:0005975|carbohydrate metabolic process
H7N9|>gi|115278578|gb|ABI84697.1| neuraminidase [Influenza A virus (A/turkey/Minnesota/1/1988(H7N9))]	ENSP00000408207|NEU1	1	GO:0004308|exo-alpha-sialidase activity
H7N9|>gi|115278578|gb|ABI84697.1| neuraminidase [Influenza A virus (A/turkey/Minnesota/1/1988(H7N9))]	ENSP00000408386|AMY1A	1	GO:0005975|carbohydrate metabolic process
H7N9|>gi|115278578|gb|ABI84697.1| neuraminidase [Influenza A virus (A/turkey/Minnesota/1/1988(H7N9))]	ENSP00000408587|HHIP	1	GO:0005975|carbohydrate metabolic process
H7N9|>gi|115278578|gb|ABI84697.1| neuraminidase [Influenza A virus (A/turkey/Minnesota/1/1988(H7N9))]	ENSP00000408608|UGT1A4	1	GO:0005975|carbohydrate metabolic process
H7N9|>gi|115278578|gb|ABI84697.1| neuraminidase [Influenza A virus (A/turkey/Minnesota/1/1988(H7N9))]	ENSP00000408649|MDH2	1	GO:0005975|carbohydrate metabolic process
H7N9|>gi|115278578|gb|ABI84697.1| neuraminidase [Influenza A virus (A/turkey/Minnesota/1/1988(H7N9))]	ENSP00000408770|GPD1L	1	GO:0005975|carbohydrate metabolic process
H7N9|>gi|115278578|gb|ABI84697.1| neuraminidase [Influenza A virus (A/turkey/Minnesota/1/1988(H7N9))]	ENSP00000408957|NEU1	1	GO:0004308|exo-alpha-sialidase activity
H7N9|>gi|115278578|gb|ABI84697.1| neuraminidase [Influenza A virus (A/turkey/Minnesota/1/1988(H7N9))]	ENSP00000409083|GALM	1	GO:0005975|carbohydrate metabolic process
H7N9|>gi|115278578|gb|ABI84697.1| neuraminidase [Influenza A virus (A/turkey/Minnesota/1/1988(H7N9))]	ENSP00000409109|GCKR	1	GO:0005975|carbohydrate metabolic process
H7N9|>gi|115278578|gb|ABI84697.1| neuraminidase [Influenza A virus (A/turkey/Minnesota/1/1988(H7N9))]	ENSP00000409489|NEU1	1	GO:0004308|exo-alpha-sialidase activity
H7N9|>gi|115278578|gb|ABI84697.1| neuraminidase [Influenza A virus (A/turkey/Minnesota/1/1988(H7N9))]	ENSP00000409642|HYAL2	1	GO:0005975|carbohydrate metabolic process
H7N9|>gi|115278578|gb|ABI84697.1| neuraminidase [Influenza A virus (A/turkey/Minnesota/1/1988(H7N9))]	ENSP00000409761|HK1	1	GO:0005975|carbohydrate metabolic process
H7N9|>gi|115278578|gb|ABI84697.1| neuraminidase [Influenza A virus (A/turkey/Minnesota/1/1988(H7N9))]	ENSP00000410073|MDH1	1	GO:0005975|carbohydrate metabolic process
H7N9|>gi|115278578|gb|ABI84697.1| neuraminidase [Influenza A virus (A/turkey/Minnesota/1/1988(H7N9))]	ENSP00000410598|GALM	1	GO:0005975|carbohydrate metabolic process
H7N9|>gi|115278578|gb|ABI84697.1| neuraminidase [Influenza A virus (A/turkey/Minnesota/1/1988(H7N9))]	ENSP00000410833|GBE1	1	GO:0005975|carbohydrate metabolic process
H7N9|>gi|115278578|gb|ABI84697.1| neuraminidase [Influenza A virus (A/turkey/Minnesota/1/1988(H7N9))]	ENSP00000411186|RPE	1	GO:0005975|carbohydrate metabolic process
H7N9|>gi|115278578|gb|ABI84697.1| neuraminidase [Influenza A virus (A/turkey/Minnesota/1/1988(H7N9))]	ENSP00000411262|GUSB	1	GO:0005975|carbohydrate metabolic process
H7N9|>gi|115278578|gb|ABI84697.1| neuraminidase [Influenza A virus (A/turkey/Minnesota/1/1988(H7N9))]	ENSP00000411405|RPE	1	GO:0005975|carbohydrate metabolic process
H7N9|>gi|115278578|gb|ABI84697.1| neuraminidase [Influenza A virus (A/turkey/Minnesota/1/1988(H7N9))]	ENSP00000411619|FBP1	1	GO:0005975|carbohydrate metabolic process
H7N9|>gi|115278578|gb|ABI84697.1| neuraminidase [Influenza A virus (A/turkey/Minnesota/1/1988(H7N9))]	ENSP00000411769|GLB1	1	GO:0005975|carbohydrate metabolic process
H7N9|>gi|115278578|gb|ABI84697.1| neuraminidase [Influenza A virus (A/turkey/Minnesota/1/1988(H7N9))]	ENSP00000411813|GLB1	1	GO:0005975|carbohydrate metabolic process
H7N9|>gi|115278578|gb|ABI84697.1| neuraminidase [Influenza A virus (A/turkey/Minnesota/1/1988(H7N9))]	ENSP00000411859|GUSB	1	GO:0005975|carbohydrate metabolic process
H7N9|>gi|115278578|gb|ABI84697.1| neuraminidase [Influenza A virus (A/turkey/Minnesota/1/1988(H7N9))]	ENSP00000412245|RPE	1	GO:0005975|carbohydrate metabolic process
H7N9|>gi|115278578|gb|ABI84697.1| neuraminidase [Influenza A virus (A/turkey/Minnesota/1/1988(H7N9))]	ENSP00000412282|XYLB	1	GO:0005975|carbohydrate metabolic process
H7N9|>gi|115278578|gb|ABI84697.1| neuraminidase [Influenza A virus (A/turkey/Minnesota/1/1988(H7N9))]	ENSP00000413420|UGT2B10	1	GO:0005975|carbohydrate metabolic process
H7N9|>gi|115278578|gb|ABI84697.1| neuraminidase [Influenza A virus (A/turkey/Minnesota/1/1988(H7N9))]	ENSP00000414345|PHKB	1	GO:0005975|carbohydrate metabolic process
H7N9|>gi|115278578|gb|ABI84697.1| neuraminidase [Influenza A virus (A/turkey/Minnesota/1/1988(H7N9))]	ENSP00000414656|HYAL2	1	GO:0005975|carbohydrate metabolic process
H7N9|>gi|115278578|gb|ABI84697.1| neuraminidase [Influenza A virus (A/turkey/Minnesota/1/1988(H7N9))]	ENSP00000415062|NUP50	1	GO:0005975|carbohydrate metabolic process
H7N9|>gi|115278578|gb|ABI84697.1| neuraminidase [Influenza A virus (A/turkey/Minnesota/1/1988(H7N9))]	ENSP00000415511|NUPL2	1	GO:0005975|carbohydrate metabolic process
H7N9|>gi|115278578|gb|ABI84697.1| neuraminidase [Influenza A virus (A/turkey/Minnesota/1/1988(H7N9))]	ENSP00000415514|GALNT14	1	GO:0005975|carbohydrate metabolic process
H7N9|>gi|115278578|gb|ABI84697.1| neuraminidase [Influenza A virus (A/turkey/Minnesota/1/1988(H7N9))]	ENSP00000415949|HK1	1	GO:0005975|carbohydrate metabolic process
H7N9|>gi|115278578|gb|ABI84697.1| neuraminidase [Influenza A virus (A/turkey/Minnesota/1/1988(H7N9))]	ENSP00000416034|CHID1	1	GO:0005975|carbohydrate metabolic process
H7N9|>gi|115278578|gb|ABI84697.1| neuraminidase [Influenza A virus (A/turkey/Minnesota/1/1988(H7N9))]	ENSP00000416187|HEXA	1	GO:0005975|carbohydrate metabolic process
H7N9|>gi|115278578|gb|ABI84697.1| neuraminidase [Influenza A virus (A/turkey/Minnesota/1/1988(H7N9))]	ENSP00000416293|SLC2A1	1	GO:0005975|carbohydrate metabolic process
H7N9|>gi|115278578|gb|ABI84697.1| neuraminidase [Influenza A virus (A/turkey/Minnesota/1/1988(H7N9))]	ENSP00000416577|MDH1B	1	GO:0005975|carbohydrate metabolic process
H7N9|>gi|115278578|gb|ABI84697.1| neuraminidase [Influenza A virus (A/turkey/Minnesota/1/1988(H7N9))]	ENSP00000416793|GUSB	1	GO:0005975|carbohydrate metabolic process
H7N9|>gi|115278578|gb|ABI84697.1| neuraminidase [Influenza A virus (A/turkey/Minnesota/1/1988(H7N9))]	ENSP00000416805|RPE	1	GO:0005975|carbohydrate metabolic process
H7N9|>gi|115278578|gb|ABI84697.1| neuraminidase [Influenza A virus (A/turkey/Minnesota/1/1988(H7N9))]	ENSP00000416872|PARG	1	GO:0005975|carbohydrate metabolic process
H7N9|>gi|115278578|gb|ABI84697.1| neuraminidase [Influenza A virus (A/turkey/Minnesota/1/1988(H7N9))]	ENSP00000416929|MDH2	1	GO:0005975|carbohydrate metabolic process
H7N9|>gi|115278578|gb|ABI84697.1| neuraminidase [Influenza A virus (A/turkey/Minnesota/1/1988(H7N9))]	ENSP00000417103|MGAM	1	GO:0005975|carbohydrate metabolic process
H7N9|>gi|115278578|gb|ABI84697.1| neuraminidase [Influenza A virus (A/turkey/Minnesota/1/1988(H7N9))]	ENSP00000417186|HYAL4	1	GO:0005975|carbohydrate metabolic process
H7N9|>gi|115278578|gb|ABI84697.1| neuraminidase [Influenza A virus (A/turkey/Minnesota/1/1988(H7N9))]	ENSP00000417188|B4GALT4	1	GO:0005975|carbohydrate metabolic process
H7N9|>gi|115278578|gb|ABI84697.1| neuraminidase [Influenza A virus (A/turkey/Minnesota/1/1988(H7N9))]	ENSP00000417226|B4GALT4	1	GO:0005975|carbohydrate metabolic process
H7N9|>gi|115278578|gb|ABI84697.1| neuraminidase [Influenza A virus (A/turkey/Minnesota/1/1988(H7N9))]	ENSP00000417515|MGAM	1	GO:0005975|carbohydrate metabolic process
H7N9|>gi|115278578|gb|ABI84697.1| neuraminidase [Influenza A virus (A/turkey/Minnesota/1/1988(H7N9))]	ENSP00000417527|B4GALT4	1	GO:0005975|carbohydrate metabolic process
H7N9|>gi|115278578|gb|ABI84697.1| neuraminidase [Influenza A virus (A/turkey/Minnesota/1/1988(H7N9))]	ENSP00000417773|TKT	1	GO:0005975|carbohydrate metabolic process
H7N9|>gi|115278578|gb|ABI84697.1| neuraminidase [Influenza A virus (A/turkey/Minnesota/1/1988(H7N9))]	ENSP00000417872|HYAL4	1	GO:0005975|carbohydrate metabolic process
H7N9|>gi|115278578|gb|ABI84697.1| neuraminidase [Influenza A virus (A/turkey/Minnesota/1/1988(H7N9))]	ENSP00000417934|SPAM1	1	GO:0005975|carbohydrate metabolic process
H7N9|>gi|115278578|gb|ABI84697.1| neuraminidase [Influenza A virus (A/turkey/Minnesota/1/1988(H7N9))]	ENSP00000417942|GK	1	GO:0005975|carbohydrate metabolic process
H7N9|>gi|115278578|gb|ABI84697.1| neuraminidase [Influenza A virus (A/turkey/Minnesota/1/1988(H7N9))]	ENSP00000417958|B4GALT4	1	GO:0005975|carbohydrate metabolic process
H7N9|>gi|115278578|gb|ABI84697.1| neuraminidase [Influenza A virus (A/turkey/Minnesota/1/1988(H7N9))]	ENSP00000418001|GK5	1	GO:0005975|carbohydrate metabolic process
H7N9|>gi|115278578|gb|ABI84697.1| neuraminidase [Influenza A virus (A/turkey/Minnesota/1/1988(H7N9))]	ENSP00000418239|GK5	1	GO:0005975|carbohydrate metabolic process
H7N9|>gi|115278578|gb|ABI84697.1| neuraminidase [Influenza A virus (A/turkey/Minnesota/1/1988(H7N9))]	ENSP00000418532|UGT1A3	1	GO:0005975|carbohydrate metabolic process
H7N9|>gi|115278578|gb|ABI84697.1| neuraminidase [Influenza A virus (A/turkey/Minnesota/1/1988(H7N9))]	ENSP00000418555|NUPL1	1	GO:0005975|carbohydrate metabolic process
H7N9|>gi|115278578|gb|ABI84697.1| neuraminidase [Influenza A virus (A/turkey/Minnesota/1/1988(H7N9))]	ENSP00000418873|GK	1	GO:0005975|carbohydrate metabolic process
H7N9|>gi|115278578|gb|ABI84697.1| neuraminidase [Influenza A virus (A/turkey/Minnesota/1/1988(H7N9))]	ENSP00000419031|GK5	1	GO:0005975|carbohydrate metabolic process
H7N9|>gi|115278578|gb|ABI84697.1| neuraminidase [Influenza A virus (A/turkey/Minnesota/1/1988(H7N9))]	ENSP00000419372|MGAM	1	GO:0005975|carbohydrate metabolic process
H7N9|>gi|115278578|gb|ABI84697.1| neuraminidase [Influenza A virus (A/turkey/Minnesota/1/1988(H7N9))]	ENSP00000419450|SI	1	GO:0005975|carbohydrate metabolic process
H7N9|>gi|115278578|gb|ABI84697.1| neuraminidase [Influenza A virus (A/turkey/Minnesota/1/1988(H7N9))]	ENSP00000419522|HYAL4	1	GO:0005975|carbohydrate metabolic process
H7N9|>gi|115278578|gb|ABI84697.1| neuraminidase [Influenza A virus (A/turkey/Minnesota/1/1988(H7N9))]	ENSP00000419638|GBE1	1	GO:0005975|carbohydrate metabolic process
H7N9|>gi|115278578|gb|ABI84697.1| neuraminidase [Influenza A virus (A/turkey/Minnesota/1/1988(H7N9))]	ENSP00000419651|GK5	1	GO:0005975|carbohydrate metabolic process
H7N9|>gi|115278578|gb|ABI84697.1| neuraminidase [Influenza A virus (A/turkey/Minnesota/1/1988(H7N9))]	ENSP00000419919|B4GALT4	1	GO:0005975|carbohydrate metabolic process
H7N9|>gi|115278578|gb|ABI84697.1| neuraminidase [Influenza A virus (A/turkey/Minnesota/1/1988(H7N9))]	ENSP00000420161|B4GALT4	1	GO:0005975|carbohydrate metabolic process
H7N9|>gi|115278578|gb|ABI84697.1| neuraminidase [Influenza A virus (A/turkey/Minnesota/1/1988(H7N9))]	ENSP00000420264|HYAL4	1	GO:0005975|carbohydrate metabolic process
H7N9|>gi|115278578|gb|ABI84697.1| neuraminidase [Influenza A virus (A/turkey/Minnesota/1/1988(H7N9))]	ENSP00000420312|GK5	1	GO:0005975|carbohydrate metabolic process
H7N9|>gi|115278578|gb|ABI84697.1| neuraminidase [Influenza A virus (A/turkey/Minnesota/1/1988(H7N9))]	ENSP00000420449|RP11-1220K2.2	1	GO:0005975|carbohydrate metabolic process
H7N9|>gi|115278578|gb|ABI84697.1| neuraminidase [Influenza A virus (A/turkey/Minnesota/1/1988(H7N9))]	ENSP00000420593|GK5	1	GO:0005975|carbohydrate metabolic process
H7N9|>gi|115278578|gb|ABI84697.1| neuraminidase [Influenza A virus (A/turkey/Minnesota/1/1988(H7N9))]	ENSP00000420665|B4GALT4	1	GO:0005975|carbohydrate metabolic process
H7N9|>gi|115278578|gb|ABI84697.1| neuraminidase [Influenza A virus (A/turkey/Minnesota/1/1988(H7N9))]	ENSP00000420676|GK	1	GO:0005975|carbohydrate metabolic process
H7N9|>gi|115278578|gb|ABI84697.1| neuraminidase [Influenza A virus (A/turkey/Minnesota/1/1988(H7N9))]	ENSP00000420793|UGP2	1	GO:0005975|carbohydrate metabolic process
H7N9|>gi|115278578|gb|ABI84697.1| neuraminidase [Influenza A virus (A/turkey/Minnesota/1/1988(H7N9))]	ENSP00000420886|B4GALT7	1	GO:0005975|carbohydrate metabolic process
H7N9|>gi|115278578|gb|ABI84697.1| neuraminidase [Influenza A virus (A/turkey/Minnesota/1/1988(H7N9))]	ENSP00000421038|HPSE	1	GO:0005975|carbohydrate metabolic process
H7N9|>gi|115278578|gb|ABI84697.1| neuraminidase [Influenza A virus (A/turkey/Minnesota/1/1988(H7N9))]	ENSP00000421154|PGM3	1	GO:0005975|carbohydrate metabolic process
H7N9|>gi|115278578|gb|ABI84697.1| neuraminidase [Influenza A virus (A/turkey/Minnesota/1/1988(H7N9))]	ENSP00000421185|RP11-542P2.1	1	GO:0005975|carbohydrate metabolic process
H7N9|>gi|115278578|gb|ABI84697.1| neuraminidase [Influenza A virus (A/turkey/Minnesota/1/1988(H7N9))]	ENSP00000421365|HPSE	1	GO:0005975|carbohydrate metabolic process
H7N9|>gi|115278578|gb|ABI84697.1| neuraminidase [Influenza A virus (A/turkey/Minnesota/1/1988(H7N9))]	ENSP00000421432|UGT2A1	1	GO:0005975|carbohydrate metabolic process
H7N9|>gi|115278578|gb|ABI84697.1| neuraminidase [Influenza A virus (A/turkey/Minnesota/1/1988(H7N9))]	ENSP00000421524|GNPDA1	1	GO:0005975|carbohydrate metabolic process
H7N9|>gi|115278578|gb|ABI84697.1| neuraminidase [Influenza A virus (A/turkey/Minnesota/1/1988(H7N9))]	ENSP00000421565|PGM3	1	GO:0005975|carbohydrate metabolic process
H7N9|>gi|115278578|gb|ABI84697.1| neuraminidase [Influenza A virus (A/turkey/Minnesota/1/1988(H7N9))]	ENSP00000421617|CHIT1	1	GO:0005975|carbohydrate metabolic process
H7N9|>gi|115278578|gb|ABI84697.1| neuraminidase [Influenza A virus (A/turkey/Minnesota/1/1988(H7N9))]	ENSP00000422169|HK3	1	GO:0005975|carbohydrate metabolic process
H7N9|>gi|115278578|gb|ABI84697.1| neuraminidase [Influenza A virus (A/turkey/Minnesota/1/1988(H7N9))]	ENSP00000422173|GNPDA1	1	GO:0005975|carbohydrate metabolic process
H7N9|>gi|115278578|gb|ABI84697.1| neuraminidase [Influenza A virus (A/turkey/Minnesota/1/1988(H7N9))]	ENSP00000422362|PGM3	1	GO:0005975|carbohydrate metabolic process
H7N9|>gi|115278578|gb|ABI84697.1| neuraminidase [Influenza A virus (A/turkey/Minnesota/1/1988(H7N9))]	ENSP00000422714|RP11-542P2.1	1	GO:0005975|carbohydrate metabolic process
H7N9|>gi|115278578|gb|ABI84697.1| neuraminidase [Influenza A virus (A/turkey/Minnesota/1/1988(H7N9))]	ENSP00000422785|PGM2	1	GO:0005975|carbohydrate metabolic process
H7N9|>gi|115278578|gb|ABI84697.1| neuraminidase [Influenza A virus (A/turkey/Minnesota/1/1988(H7N9))]	ENSP00000422952|IDUA	1	GO:0005975|carbohydrate metabolic process
H7N9|>gi|115278578|gb|ABI84697.1| neuraminidase [Influenza A virus (A/turkey/Minnesota/1/1988(H7N9))]	ENSP00000423129|MAN2B2	1	GO:0005975|carbohydrate metabolic process
H7N9|>gi|115278578|gb|ABI84697.1| neuraminidase [Influenza A virus (A/turkey/Minnesota/1/1988(H7N9))]	ENSP00000423265|HPSE	1	GO:0005975|carbohydrate metabolic process
H7N9|>gi|115278578|gb|ABI84697.1| neuraminidase [Influenza A virus (A/turkey/Minnesota/1/1988(H7N9))]	ENSP00000423269|PGM2	1	GO:0005975|carbohydrate metabolic process
H7N9|>gi|115278578|gb|ABI84697.1| neuraminidase [Influenza A virus (A/turkey/Minnesota/1/1988(H7N9))]	ENSP00000423389|PGM3	1	GO:0005975|carbohydrate metabolic process
H7N9|>gi|115278578|gb|ABI84697.1| neuraminidase [Influenza A virus (A/turkey/Minnesota/1/1988(H7N9))]	ENSP00000423438|B4GALT7	1	GO:0005975|carbohydrate metabolic process
H7N9|>gi|115278578|gb|ABI84697.1| neuraminidase [Influenza A virus (A/turkey/Minnesota/1/1988(H7N9))]	ENSP00000423485|GNPDA1	1	GO:0005975|carbohydrate metabolic process
H7N9|>gi|115278578|gb|ABI84697.1| neuraminidase [Influenza A virus (A/turkey/Minnesota/1/1988(H7N9))]	ENSP00000423494|GNPDA1	1	GO:0005975|carbohydrate metabolic process
H7N9|>gi|115278578|gb|ABI84697.1| neuraminidase [Influenza A virus (A/turkey/Minnesota/1/1988(H7N9))]	ENSP00000423674|GNPDA1	1	GO:0005975|carbohydrate metabolic process
H7N9|>gi|115278578|gb|ABI84697.1| neuraminidase [Influenza A virus (A/turkey/Minnesota/1/1988(H7N9))]	ENSP00000423685|IDUA	1	GO:0005975|carbohydrate metabolic process
H7N9|>gi|115278578|gb|ABI84697.1| neuraminidase [Influenza A virus (A/turkey/Minnesota/1/1988(H7N9))]	ENSP00000423713|HEXB	1	GO:0005975|carbohydrate metabolic process
H7N9|>gi|115278578|gb|ABI84697.1| neuraminidase [Influenza A virus (A/turkey/Minnesota/1/1988(H7N9))]	ENSP00000423767|RP11-542P2.1	1	GO:0005975|carbohydrate metabolic process
H7N9|>gi|115278578|gb|ABI84697.1| neuraminidase [Influenza A virus (A/turkey/Minnesota/1/1988(H7N9))]	ENSP00000423768|RP11-542P2.1	1	GO:0005975|carbohydrate metabolic process
H7N9|>gi|115278578|gb|ABI84697.1| neuraminidase [Influenza A virus (A/turkey/Minnesota/1/1988(H7N9))]	ENSP00000423769|PGM3	1	GO:0005975|carbohydrate metabolic process
H7N9|>gi|115278578|gb|ABI84697.1| neuraminidase [Influenza A virus (A/turkey/Minnesota/1/1988(H7N9))]	ENSP00000423778|CHIT1	1	GO:0005975|carbohydrate metabolic process
H7N9|>gi|115278578|gb|ABI84697.1| neuraminidase [Influenza A virus (A/turkey/Minnesota/1/1988(H7N9))]	ENSP00000423868|B4GALT7	1	GO:0005975|carbohydrate metabolic process
H7N9|>gi|115278578|gb|ABI84697.1| neuraminidase [Influenza A virus (A/turkey/Minnesota/1/1988(H7N9))]	ENSP00000424061|GNPDA2	1	GO:0005975|carbohydrate metabolic process
H7N9|>gi|115278578|gb|ABI84697.1| neuraminidase [Influenza A virus (A/turkey/Minnesota/1/1988(H7N9))]	ENSP00000424227|IDUA	1	GO:0005975|carbohydrate metabolic process
H7N9|>gi|115278578|gb|ABI84697.1| neuraminidase [Influenza A virus (A/turkey/Minnesota/1/1988(H7N9))]	ENSP00000424275|GNPDA1	1	GO:0005975|carbohydrate metabolic process
H7N9|>gi|115278578|gb|ABI84697.1| neuraminidase [Influenza A virus (A/turkey/Minnesota/1/1988(H7N9))]	ENSP00000424478|UGT2A1	1	GO:0005975|carbohydrate metabolic process
H7N9|>gi|115278578|gb|ABI84697.1| neuraminidase [Influenza A virus (A/turkey/Minnesota/1/1988(H7N9))]	ENSP00000424537|GNPDA1	1	GO:0005975|carbohydrate metabolic process
H7N9|>gi|115278578|gb|ABI84697.1| neuraminidase [Influenza A virus (A/turkey/Minnesota/1/1988(H7N9))]	ENSP00000424625|GNPDA1	1	GO:0005975|carbohydrate metabolic process
H7N9|>gi|115278578|gb|ABI84697.1| neuraminidase [Influenza A virus (A/turkey/Minnesota/1/1988(H7N9))]	ENSP00000424632|HK3	1	GO:0005975|carbohydrate metabolic process
H7N9|>gi|115278578|gb|ABI84697.1| neuraminidase [Influenza A virus (A/turkey/Minnesota/1/1988(H7N9))]	ENSP00000424633|HYAL3	1	GO:0005975|carbohydrate metabolic process
H7N9|>gi|115278578|gb|ABI84697.1| neuraminidase [Influenza A virus (A/turkey/Minnesota/1/1988(H7N9))]	ENSP00000424847|IDUA	1	GO:0005975|carbohydrate metabolic process
H7N9|>gi|115278578|gb|ABI84697.1| neuraminidase [Influenza A virus (A/turkey/Minnesota/1/1988(H7N9))]	ENSP00000424865|PGM3	1	GO:0005975|carbohydrate metabolic process
H7N9|>gi|115278578|gb|ABI84697.1| neuraminidase [Influenza A virus (A/turkey/Minnesota/1/1988(H7N9))]	ENSP00000424874|PGM3	1	GO:0005975|carbohydrate metabolic process
H7N9|>gi|115278578|gb|ABI84697.1| neuraminidase [Influenza A virus (A/turkey/Minnesota/1/1988(H7N9))]	ENSP00000425081|IDUA	1	GO:0005975|carbohydrate metabolic process
H7N9|>gi|115278578|gb|ABI84697.1| neuraminidase [Influenza A virus (A/turkey/Minnesota/1/1988(H7N9))]	ENSP00000425497|UGT2A1	1	GO:0005975|carbohydrate metabolic process
H7N9|>gi|115278578|gb|ABI84697.1| neuraminidase [Influenza A virus (A/turkey/Minnesota/1/1988(H7N9))]	ENSP00000425558|PGM3	1	GO:0005975|carbohydrate metabolic process
H7N9|>gi|115278578|gb|ABI84697.1| neuraminidase [Influenza A virus (A/turkey/Minnesota/1/1988(H7N9))]	ENSP00000425591|B4GALT7	1	GO:0005975|carbohydrate metabolic process
H7N9|>gi|115278578|gb|ABI84697.1| neuraminidase [Influenza A virus (A/turkey/Minnesota/1/1988(H7N9))]	ENSP00000425733|PGM2	1	GO:0005975|carbohydrate metabolic process
H7N9|>gi|115278578|gb|ABI84697.1| neuraminidase [Influenza A virus (A/turkey/Minnesota/1/1988(H7N9))]	ENSP00000425809|PGM3	1	GO:0005975|carbohydrate metabolic process
H7N9|>gi|115278578|gb|ABI84697.1| neuraminidase [Influenza A virus (A/turkey/Minnesota/1/1988(H7N9))]	ENSP00000425868|GNPDA2	1	GO:0005975|carbohydrate metabolic process
H7N9|>gi|115278578|gb|ABI84697.1| neuraminidase [Influenza A virus (A/turkey/Minnesota/1/1988(H7N9))]	ENSP00000426100|UGT3A1	1	GO:0005975|carbohydrate metabolic process
H7N9|>gi|115278578|gb|ABI84697.1| neuraminidase [Influenza A virus (A/turkey/Minnesota/1/1988(H7N9))]	ENSP00000426225|RP11-542P2.1	1	GO:0005975|carbohydrate metabolic process
H7N9|>gi|115278578|gb|ABI84697.1| neuraminidase [Influenza A virus (A/turkey/Minnesota/1/1988(H7N9))]	ENSP00000426273|MAN2B2	1	GO:0005975|carbohydrate metabolic process
H7N9|>gi|115278578|gb|ABI84697.1| neuraminidase [Influenza A virus (A/turkey/Minnesota/1/1988(H7N9))]	ENSP00000426285|HEXB	1	GO:0005975|carbohydrate metabolic process
H7N9|>gi|115278578|gb|ABI84697.1| neuraminidase [Influenza A virus (A/turkey/Minnesota/1/1988(H7N9))]	ENSP00000426384|HEXB	1	GO:0005975|carbohydrate metabolic process
H7N9|>gi|115278578|gb|ABI84697.1| neuraminidase [Influenza A virus (A/turkey/Minnesota/1/1988(H7N9))]	ENSP00000426738|PGM2	1	GO:0005975|carbohydrate metabolic process
H7N9|>gi|115278578|gb|ABI84697.1| neuraminidase [Influenza A virus (A/turkey/Minnesota/1/1988(H7N9))]	ENSP00000426892|ALG13	1	GO:0005975|carbohydrate metabolic process
H7N9|>gi|115278578|gb|ABI84697.1| neuraminidase [Influenza A virus (A/turkey/Minnesota/1/1988(H7N9))]	ENSP00000427079|UGT3A1	1	GO:0005975|carbohydrate metabolic process
H7N9|>gi|115278578|gb|ABI84697.1| neuraminidase [Influenza A virus (A/turkey/Minnesota/1/1988(H7N9))]	ENSP00000427322|MANBA	1	GO:0005975|carbohydrate metabolic process
H7N9|>gi|115278578|gb|ABI84697.1| neuraminidase [Influenza A virus (A/turkey/Minnesota/1/1988(H7N9))]	ENSP00000427404|UGT3A2	1	GO:0005975|carbohydrate metabolic process
H7N9|>gi|115278578|gb|ABI84697.1| neuraminidase [Influenza A virus (A/turkey/Minnesota/1/1988(H7N9))]	ENSP00000427420|PGM3	1	GO:0005975|carbohydrate metabolic process
H7N9|>gi|115278578|gb|ABI84697.1| neuraminidase [Influenza A virus (A/turkey/Minnesota/1/1988(H7N9))]	ENSP00000427423|GNPDA2	1	GO:0005975|carbohydrate metabolic process
H7N9|>gi|115278578|gb|ABI84697.1| neuraminidase [Influenza A virus (A/turkey/Minnesota/1/1988(H7N9))]	ENSP00000427995|MGAT4B	1	GO:0005975|carbohydrate metabolic process
H7N9|>gi|115278578|gb|ABI84697.1| neuraminidase [Influenza A virus (A/turkey/Minnesota/1/1988(H7N9))]	ENSP00000428764|MGAT4B	1	GO:0005975|carbohydrate metabolic process
H7N9|>gi|115278578|gb|ABI84697.1| neuraminidase [Influenza A virus (A/turkey/Minnesota/1/1988(H7N9))]	ENSP00000428906|MGAT4B	1	GO:0005975|carbohydrate metabolic process
H7N9|>gi|115278578|gb|ABI84697.1| neuraminidase [Influenza A virus (A/turkey/Minnesota/1/1988(H7N9))]	ENSP00000428960|MGAT4B	1	GO:0005975|carbohydrate metabolic process
H7N9|>gi|115278578|gb|ABI84697.1| neuraminidase [Influenza A virus (A/turkey/Minnesota/1/1988(H7N9))]	ENSP00000430227|FUT2	1	GO:0005975|carbohydrate metabolic process
H7N9|>gi|115278578|gb|ABI84697.1| neuraminidase [Influenza A virus (A/turkey/Minnesota/1/1988(H7N9))]	ENSP00000430376|MGAT4B	1	GO:0005975|carbohydrate metabolic process
H7N9|>gi|115278578|gb|ABI84697.1| neuraminidase [Influenza A virus (A/turkey/Minnesota/1/1988(H7N9))]	ENSP00000430636|ENO3	1	GO:0005975|carbohydrate metabolic process
H7N9|>gi|115278578|gb|ABI84697.1| neuraminidase [Influenza A virus (A/turkey/Minnesota/1/1988(H7N9))]	ENSP00000430721|MGAT4B	1	GO:0005975|carbohydrate metabolic process
H7N9|>gi|115278578|gb|ABI84697.1| neuraminidase [Influenza A virus (A/turkey/Minnesota/1/1988(H7N9))]	ENSP00000430723|MGAT4B	1	GO:0005975|carbohydrate metabolic process
H7N9|>gi|115278578|gb|ABI84697.1| neuraminidase [Influenza A virus (A/turkey/Minnesota/1/1988(H7N9))]	ENSP00000431093|MGAT4B	1	GO:0005975|carbohydrate metabolic process
H7N9|>gi|115278578|gb|ABI84697.1| neuraminidase [Influenza A virus (A/turkey/Minnesota/1/1988(H7N9))]	ENSP00000431169|CHID1	1	GO:0005975|carbohydrate metabolic process
H7N9|>gi|115278578|gb|ABI84697.1| neuraminidase [Influenza A virus (A/turkey/Minnesota/1/1988(H7N9))]	ENSP00000431495|NUP160	1	GO:0005975|carbohydrate metabolic process
H7N9|>gi|115278578|gb|ABI84697.1| neuraminidase [Influenza A virus (A/turkey/Minnesota/1/1988(H7N9))]	ENSP00000431657|PYGL	1	GO:0005975|carbohydrate metabolic process
H7N9|>gi|115278578|gb|ABI84697.1| neuraminidase [Influenza A virus (A/turkey/Minnesota/1/1988(H7N9))]	ENSP00000431968|CHI3L2	1	GO:0005975|carbohydrate metabolic process
H7N9|>gi|115278578|gb|ABI84697.1| neuraminidase [Influenza A virus (A/turkey/Minnesota/1/1988(H7N9))]	ENSP00000431978|CHI3L2	1	GO:0005975|carbohydrate metabolic process
H7N9|>gi|115278578|gb|ABI84697.1| neuraminidase [Influenza A virus (A/turkey/Minnesota/1/1988(H7N9))]	ENSP00000432049|CHI3L2	1	GO:0005975|carbohydrate metabolic process
H7N9|>gi|115278578|gb|ABI84697.1| neuraminidase [Influenza A virus (A/turkey/Minnesota/1/1988(H7N9))]	ENSP00000432097|NEU3	1	GO:0005975|carbohydrate metabolic process
H7N9|>gi|115278578|gb|ABI84697.1| neuraminidase [Influenza A virus (A/turkey/Minnesota/1/1988(H7N9))]	ENSP00000432401|NUP43	1	GO:0005975|carbohydrate metabolic process
H7N9|>gi|115278578|gb|ABI84697.1| neuraminidase [Influenza A virus (A/turkey/Minnesota/1/1988(H7N9))]	ENSP00000432527|GLB1L2	1	GO:0005975|carbohydrate metabolic process
H7N9|>gi|115278578|gb|ABI84697.1| neuraminidase [Influenza A virus (A/turkey/Minnesota/1/1988(H7N9))]	ENSP00000433040|PYGL	1	GO:0005975|carbohydrate metabolic process
H7N9|>gi|115278578|gb|ABI84697.1| neuraminidase [Influenza A virus (A/turkey/Minnesota/1/1988(H7N9))]	ENSP00000433176|CHI3L2	1	GO:0005975|carbohydrate metabolic process
H7N9|>gi|115278578|gb|ABI84697.1| neuraminidase [Influenza A virus (A/turkey/Minnesota/1/1988(H7N9))]	ENSP00000433309|CHIA	1	GO:0005975|carbohydrate metabolic process
H7N9|>gi|115278578|gb|ABI84697.1| neuraminidase [Influenza A virus (A/turkey/Minnesota/1/1988(H7N9))]	ENSP00000433347|AMY2B	1	GO:0005975|carbohydrate metabolic process
H7N9|>gi|115278578|gb|ABI84697.1| neuraminidase [Influenza A virus (A/turkey/Minnesota/1/1988(H7N9))]	ENSP00000433501|TALDO1	1	GO:0005975|carbohydrate metabolic process
H7N9|>gi|115278578|gb|ABI84697.1| neuraminidase [Influenza A virus (A/turkey/Minnesota/1/1988(H7N9))]	ENSP00000433847|B3GAT1	1	GO:0005975|carbohydrate metabolic process
H7N9|>gi|115278578|gb|ABI84697.1| neuraminidase [Influenza A virus (A/turkey/Minnesota/1/1988(H7N9))]	ENSP00000434601|GLB1L2	1	GO:0005975|carbohydrate metabolic process
H7N9|>gi|115278578|gb|ABI84697.1| neuraminidase [Influenza A virus (A/turkey/Minnesota/1/1988(H7N9))]	ENSP00000434651|CHID1	1	GO:0005975|carbohydrate metabolic process
H7N9|>gi|115278578|gb|ABI84697.1| neuraminidase [Influenza A virus (A/turkey/Minnesota/1/1988(H7N9))]	ENSP00000435250|CHI3L2	1	GO:0005975|carbohydrate metabolic process
H7N9|>gi|115278578|gb|ABI84697.1| neuraminidase [Influenza A virus (A/turkey/Minnesota/1/1988(H7N9))]	ENSP00000435306|GANAB	1	GO:0005975|carbohydrate metabolic process
H7N9|>gi|115278578|gb|ABI84697.1| neuraminidase [Influenza A virus (A/turkey/Minnesota/1/1988(H7N9))]	ENSP00000435336|CHID1	1	GO:0005975|carbohydrate metabolic process
H7N9|>gi|115278578|gb|ABI84697.1| neuraminidase [Influenza A virus (A/turkey/Minnesota/1/1988(H7N9))]	ENSP00000435503|CHID1	1	GO:0005975|carbohydrate metabolic process
H7N9|>gi|115278578|gb|ABI84697.1| neuraminidase [Influenza A virus (A/turkey/Minnesota/1/1988(H7N9))]	ENSP00000435935|CHI3L2	1	GO:0005975|carbohydrate metabolic process
H7N9|>gi|115278578|gb|ABI84697.1| neuraminidase [Influenza A virus (A/turkey/Minnesota/1/1988(H7N9))]	ENSP00000436006|CHI3L2	1	GO:0005975|carbohydrate metabolic process
H7N9|>gi|115278578|gb|ABI84697.1| neuraminidase [Influenza A virus (A/turkey/Minnesota/1/1988(H7N9))]	ENSP00000436077|CHI3L2	1	GO:0005975|carbohydrate metabolic process
H7N9|>gi|115278578|gb|ABI84697.1| neuraminidase [Influenza A virus (A/turkey/Minnesota/1/1988(H7N9))]	ENSP00000436272|CHI3L2	1	GO:0005975|carbohydrate metabolic process
H7N9|>gi|115278578|gb|ABI84697.1| neuraminidase [Influenza A virus (A/turkey/Minnesota/1/1988(H7N9))]	ENSP00000436380|CHI3L2	1	GO:0005975|carbohydrate metabolic process
H7N9|>gi|115278578|gb|ABI84697.1| neuraminidase [Influenza A virus (A/turkey/Minnesota/1/1988(H7N9))]	ENSP00000436604|GALNT4	1	GO:0005975|carbohydrate metabolic process
H7N9|>gi|115278578|gb|ABI84697.1| neuraminidase [Influenza A virus (A/turkey/Minnesota/1/1988(H7N9))]	ENSP00000436946|CHIA	1	GO:0005975|carbohydrate metabolic process
H7N9|>gi|115278578|gb|ABI84697.1| neuraminidase [Influenza A virus (A/turkey/Minnesota/1/1988(H7N9))]	ENSP00000437082|CHI3L2	1	GO:0005975|carbohydrate metabolic process
H7N9|>gi|115278578|gb|ABI84697.1| neuraminidase [Influenza A virus (A/turkey/Minnesota/1/1988(H7N9))]	ENSP00000437086|CHI3L2	1	GO:0005975|carbohydrate metabolic process
H7N9|>gi|115278578|gb|ABI84697.1| neuraminidase [Influenza A virus (A/turkey/Minnesota/1/1988(H7N9))]	ENSP00000437098|TALDO1	1	GO:0005975|carbohydrate metabolic process
H7N9|>gi|115278578|gb|ABI84697.1| neuraminidase [Influenza A virus (A/turkey/Minnesota/1/1988(H7N9))]	ENSP00000437342|PGM2	1	GO:0005975|carbohydrate metabolic process
H7N9|>gi|115278578|gb|ABI84697.1| neuraminidase [Influenza A virus (A/turkey/Minnesota/1/1988(H7N9))]	ENSP00000437402|ENO2	1	GO:0005975|carbohydrate metabolic process
H7N9|>gi|115278578|gb|ABI84697.1| neuraminidase [Influenza A virus (A/turkey/Minnesota/1/1988(H7N9))]	ENSP00000437513|GALC	1	GO:0005975|carbohydrate metabolic process
H7N9|>gi|115278578|gb|ABI84697.1| neuraminidase [Influenza A virus (A/turkey/Minnesota/1/1988(H7N9))]	ENSP00000437538|UEVLD	1	GO:0005975|carbohydrate metabolic process
H7N9|>gi|115278578|gb|ABI84697.1| neuraminidase [Influenza A virus (A/turkey/Minnesota/1/1988(H7N9))]	ENSP00000437663|GBGT1	1	GO:0005975|carbohydrate metabolic process
H7N9|>gi|115278578|gb|ABI84697.1| neuraminidase [Influenza A virus (A/turkey/Minnesota/1/1988(H7N9))]	ENSP00000437783|LDHC	1	GO:0005975|carbohydrate metabolic process
H7N9|>gi|115278578|gb|ABI84697.1| neuraminidase [Influenza A virus (A/turkey/Minnesota/1/1988(H7N9))]	ENSP00000438025|PGM2	1	GO:0005975|carbohydrate metabolic process
H7N9|>gi|115278578|gb|ABI84697.1| neuraminidase [Influenza A virus (A/turkey/Minnesota/1/1988(H7N9))]	ENSP00000438032|SLC3A2	1	GO:0005975|carbohydrate metabolic process
H7N9|>gi|115278578|gb|ABI84697.1| neuraminidase [Influenza A virus (A/turkey/Minnesota/1/1988(H7N9))]	ENSP00000438078|CHIT1	1	GO:0005975|carbohydrate metabolic process
H7N9|>gi|115278578|gb|ABI84697.1| neuraminidase [Influenza A virus (A/turkey/Minnesota/1/1988(H7N9))]	ENSP00000438144|MDH1	1	GO:0005975|carbohydrate metabolic process
H7N9|>gi|115278578|gb|ABI84697.1| neuraminidase [Influenza A virus (A/turkey/Minnesota/1/1988(H7N9))]	ENSP00000438241|LDHA	1	GO:0005975|carbohydrate metabolic process
H7N9|>gi|115278578|gb|ABI84697.1| neuraminidase [Influenza A virus (A/turkey/Minnesota/1/1988(H7N9))]	ENSP00000438353|SLC3A2	1	GO:0005975|carbohydrate metabolic process
H7N9|>gi|115278578|gb|ABI84697.1| neuraminidase [Influenza A virus (A/turkey/Minnesota/1/1988(H7N9))]	ENSP00000438449|OVGP1	1	GO:0005975|carbohydrate metabolic process
H7N9|>gi|115278578|gb|ABI84697.1| neuraminidase [Influenza A virus (A/turkey/Minnesota/1/1988(H7N9))]	ENSP00000438556|HK2	1	GO:0005975|carbohydrate metabolic process
H7N9|>gi|115278578|gb|ABI84697.1| neuraminidase [Influenza A virus (A/turkey/Minnesota/1/1988(H7N9))]	ENSP00000438873|ENO2	1	GO:0005975|carbohydrate metabolic process
H7N9|>gi|115278578|gb|ABI84697.1| neuraminidase [Influenza A virus (A/turkey/Minnesota/1/1988(H7N9))]	ENSP00000439060|LDHC	1	GO:0005975|carbohydrate metabolic process
H7N9|>gi|115278578|gb|ABI84697.1| neuraminidase [Influenza A virus (A/turkey/Minnesota/1/1988(H7N9))]	ENSP00000439113|GANAB	1	GO:0005975|carbohydrate metabolic process
H7N9|>gi|115278578|gb|ABI84697.1| neuraminidase [Influenza A virus (A/turkey/Minnesota/1/1988(H7N9))]	ENSP00000439154|ABO	1	GO:0005975|carbohydrate metabolic process
H7N9|>gi|115278578|gb|ABI84697.1| neuraminidase [Influenza A virus (A/turkey/Minnesota/1/1988(H7N9))]	ENSP00000439206|RPE	1	GO:0005975|carbohydrate metabolic process
H7N9|>gi|115278578|gb|ABI84697.1| neuraminidase [Influenza A virus (A/turkey/Minnesota/1/1988(H7N9))]	ENSP00000439555|LDHC	1	GO:0005975|carbohydrate metabolic process
H7N9|>gi|115278578|gb|ABI84697.1| neuraminidase [Influenza A virus (A/turkey/Minnesota/1/1988(H7N9))]	ENSP00000439650|PIGQ	1	GO:0005975|carbohydrate metabolic process
H7N9|>gi|115278578|gb|ABI84697.1| neuraminidase [Influenza A virus (A/turkey/Minnesota/1/1988(H7N9))]	ENSP00000440115|UGT2A3	1	GO:0005975|carbohydrate metabolic process
H7N9|>gi|115278578|gb|ABI84697.1| neuraminidase [Influenza A virus (A/turkey/Minnesota/1/1988(H7N9))]	ENSP00000440235|NUP93	1	GO:0005975|carbohydrate metabolic process
H7N9|>gi|115278578|gb|ABI84697.1| neuraminidase [Influenza A virus (A/turkey/Minnesota/1/1988(H7N9))]	ENSP00000440341|B4GALT1	1	GO:0005975|carbohydrate metabolic process
H7N9|>gi|115278578|gb|ABI84697.1| neuraminidase [Influenza A virus (A/turkey/Minnesota/1/1988(H7N9))]	ENSP00000440447|MPI	1	GO:0005975|carbohydrate metabolic process
H7N9|>gi|115278578|gb|ABI84697.1| neuraminidase [Influenza A virus (A/turkey/Minnesota/1/1988(H7N9))]	ENSP00000440860|GK5	1	GO:0005975|carbohydrate metabolic process
H7N9|>gi|115278578|gb|ABI84697.1| neuraminidase [Influenza A virus (A/turkey/Minnesota/1/1988(H7N9))]	ENSP00000441092|UEVLD	1	GO:0005975|carbohydrate metabolic process
H7N9|>gi|115278578|gb|ABI84697.1| neuraminidase [Influenza A virus (A/turkey/Minnesota/1/1988(H7N9))]	ENSP00000441204|CHST4	1	GO:0005975|carbohydrate metabolic process
H7N9|>gi|115278578|gb|ABI84697.1| neuraminidase [Influenza A virus (A/turkey/Minnesota/1/1988(H7N9))]	ENSP00000441220|CHST5	1	GO:0005975|carbohydrate metabolic process
H7N9|>gi|115278578|gb|ABI84697.1| neuraminidase [Influenza A virus (A/turkey/Minnesota/1/1988(H7N9))]	ENSP00000441251|PHKA1	1	GO:0005975|carbohydrate metabolic process
H7N9|>gi|115278578|gb|ABI84697.1| neuraminidase [Influenza A virus (A/turkey/Minnesota/1/1988(H7N9))]	ENSP00000441654|PRKACA	1	GO:0005975|carbohydrate metabolic process
H7N9|>gi|115278578|gb|ABI84697.1| neuraminidase [Influenza A virus (A/turkey/Minnesota/1/1988(H7N9))]	ENSP00000441790|PGM2L1	1	GO:0005975|carbohydrate metabolic process
H7N9|>gi|115278578|gb|ABI84697.1| neuraminidase [Influenza A virus (A/turkey/Minnesota/1/1988(H7N9))]	ENSP00000442962|GANAB	1	GO:0005975|carbohydrate metabolic process
H7N9|>gi|115278578|gb|ABI84697.1| neuraminidase [Influenza A virus (A/turkey/Minnesota/1/1988(H7N9))]	ENSP00000442974|UEVLD	1	GO:0005975|carbohydrate metabolic process
H7N9|>gi|115278578|gb|ABI84697.1| neuraminidase [Influenza A virus (A/turkey/Minnesota/1/1988(H7N9))]	ENSP00000443185|PRPS1	1	GO:0005975|carbohydrate metabolic process
H7N9|>gi|115278578|gb|ABI84697.1| neuraminidase [Influenza A virus (A/turkey/Minnesota/1/1988(H7N9))]	ENSP00000443414|LDHC	1	GO:0005975|carbohydrate metabolic process
H7N9|>gi|115278578|gb|ABI84697.1| neuraminidase [Influenza A virus (A/turkey/Minnesota/1/1988(H7N9))]	ENSP00000443449|PGM1	1	GO:0005975|carbohydrate metabolic process
H7N9|>gi|115278578|gb|ABI84697.1| neuraminidase [Influenza A virus (A/turkey/Minnesota/1/1988(H7N9))]	ENSP00000443659|XYLB	1	GO:0005975|carbohydrate metabolic process
H7N9|>gi|115278578|gb|ABI84697.1| neuraminidase [Influenza A virus (A/turkey/Minnesota/1/1988(H7N9))]	ENSP00000443787|PYGL	1	GO:0005975|carbohydrate metabolic process
H7N9|>gi|115278578|gb|ABI84697.1| neuraminidase [Influenza A virus (A/turkey/Minnesota/1/1988(H7N9))]	ENSP00000443997|LDHC	1	GO:0005975|carbohydrate metabolic process
H7N9|>gi|115278578|gb|ABI84697.1| neuraminidase [Influenza A virus (A/turkey/Minnesota/1/1988(H7N9))]	ENSP00000444236|SLC3A2	1	GO:0005975|carbohydrate metabolic process
H7N9|>gi|115278578|gb|ABI84697.1| neuraminidase [Influenza A virus (A/turkey/Minnesota/1/1988(H7N9))]	ENSP00000444439|SLC3A2	1	GO:0005975|carbohydrate metabolic process
H7N9|>gi|115278578|gb|ABI84697.1| neuraminidase [Influenza A virus (A/turkey/Minnesota/1/1988(H7N9))]	ENSP00000444628|GLB1L2	1	GO:0005975|carbohydrate metabolic process
H7N9|>gi|115278578|gb|ABI84697.1| neuraminidase [Influenza A virus (A/turkey/Minnesota/1/1988(H7N9))]	ENSP00000445037|B4GALT1	1	GO:0005975|carbohydrate metabolic process
H7N9|>gi|115278578|gb|ABI84697.1| neuraminidase [Influenza A virus (A/turkey/Minnesota/1/1988(H7N9))]	ENSP00000445143|GNPDA1	1	GO:0005975|carbohydrate metabolic process
H7N9|>gi|115278578|gb|ABI84697.1| neuraminidase [Influenza A virus (A/turkey/Minnesota/1/1988(H7N9))]	ENSP00000445175|LDHA	1	GO:0005975|carbohydrate metabolic process
H7N9|>gi|115278578|gb|ABI84697.1| neuraminidase [Influenza A virus (A/turkey/Minnesota/1/1988(H7N9))]	ENSP00000445331|LDHA	1	GO:0005975|carbohydrate metabolic process
H7N9|>gi|115278578|gb|ABI84697.1| neuraminidase [Influenza A virus (A/turkey/Minnesota/1/1988(H7N9))]	ENSP00000445367|UGT3A2	1	GO:0005975|carbohydrate metabolic process
H7N9|>gi|115278578|gb|ABI84697.1| neuraminidase [Influenza A virus (A/turkey/Minnesota/1/1988(H7N9))]	ENSP00000445419|LCTL	1	GO:0005975|carbohydrate metabolic process
H7N9|>gi|115278578|gb|ABI84697.1| neuraminidase [Influenza A virus (A/turkey/Minnesota/1/1988(H7N9))]	ENSP00000445560|GBA	1	GO:0005975|carbohydrate metabolic process
H7N9|>gi|115278578|gb|ABI84697.1| neuraminidase [Influenza A virus (A/turkey/Minnesota/1/1988(H7N9))]	ENSP00000445591|NEU3	1	GO:0005975|carbohydrate metabolic process
H7N9|>gi|115278578|gb|ABI84697.1| neuraminidase [Influenza A virus (A/turkey/Minnesota/1/1988(H7N9))]	ENSP00000445983|B3GAT1	1	GO:0005975|carbohydrate metabolic process
H7N9|>gi|115278578|gb|ABI84697.1| neuraminidase [Influenza A virus (A/turkey/Minnesota/1/1988(H7N9))]	ENSP00000446092|GYG2	1	GO:0005975|carbohydrate metabolic process
H7N9|>gi|115278578|gb|ABI84697.1| neuraminidase [Influenza A virus (A/turkey/Minnesota/1/1988(H7N9))]	ENSP00000446395|MDH1	1	GO:0005975|carbohydrate metabolic process
H7N9|>gi|115278578|gb|ABI84697.1| neuraminidase [Influenza A virus (A/turkey/Minnesota/1/1988(H7N9))]	ENSP00000446647|MGAT4C	1	GO:0005975|carbohydrate metabolic process
H7N9|>gi|115278578|gb|ABI84697.1| neuraminidase [Influenza A virus (A/turkey/Minnesota/1/1988(H7N9))]	ENSP00000446768|GPD1	1	GO:0005975|carbohydrate metabolic process
H7N9|>gi|115278578|gb|ABI84697.1| neuraminidase [Influenza A virus (A/turkey/Minnesota/1/1988(H7N9))]	ENSP00000446779|CS	1	GO:0005975|carbohydrate metabolic process
H7N9|>gi|115278578|gb|ABI84697.1| neuraminidase [Influenza A virus (A/turkey/Minnesota/1/1988(H7N9))]	ENSP00000446921|RP11-480I12.4	1	GO:0005975|carbohydrate metabolic process
H7N9|>gi|115278578|gb|ABI84697.1| neuraminidase [Influenza A virus (A/turkey/Minnesota/1/1988(H7N9))]	ENSP00000447253|MGAT4C	1	GO:0005975|carbohydrate metabolic process
H7N9|>gi|115278578|gb|ABI84697.1| neuraminidase [Influenza A virus (A/turkey/Minnesota/1/1988(H7N9))]	ENSP00000447309|AC021146.1	1	GO:0005975|carbohydrate metabolic process
H7N9|>gi|115278578|gb|ABI84697.1| neuraminidase [Influenza A virus (A/turkey/Minnesota/1/1988(H7N9))]	ENSP00000447378|MGAM	1	GO:0005975|carbohydrate metabolic process
H7N9|>gi|115278578|gb|ABI84697.1| neuraminidase [Influenza A virus (A/turkey/Minnesota/1/1988(H7N9))]	ENSP00000447431|RP11-1220K2.2	1	GO:0005975|carbohydrate metabolic process
H7N9|>gi|115278578|gb|ABI84697.1| neuraminidase [Influenza A virus (A/turkey/Minnesota/1/1988(H7N9))]	ENSP00000447700|AC021146.1	1	GO:0005975|carbohydrate metabolic process
H7N9|>gi|115278578|gb|ABI84697.1| neuraminidase [Influenza A virus (A/turkey/Minnesota/1/1988(H7N9))]	ENSP00000448054|NUP37	1	GO:0005975|carbohydrate metabolic process
H7N9|>gi|115278578|gb|ABI84697.1| neuraminidase [Influenza A virus (A/turkey/Minnesota/1/1988(H7N9))]	ENSP00000448177|PFKM	1	GO:0005975|carbohydrate metabolic process
H7N9|>gi|115278578|gb|ABI84697.1| neuraminidase [Influenza A virus (A/turkey/Minnesota/1/1988(H7N9))]	ENSP00000448306|AC019173.2	1	GO:0005975|carbohydrate metabolic process
H7N9|>gi|115278578|gb|ABI84697.1| neuraminidase [Influenza A virus (A/turkey/Minnesota/1/1988(H7N9))]	ENSP00000448551|RP11-1220K2.2	1	GO:0005975|carbohydrate metabolic process
H7N9|>gi|115278578|gb|ABI84697.1| neuraminidase [Influenza A virus (A/turkey/Minnesota/1/1988(H7N9))]	ENSP00000448690|MGAT4C	1	GO:0005975|carbohydrate metabolic process
H7N9|>gi|115278578|gb|ABI84697.1| neuraminidase [Influenza A virus (A/turkey/Minnesota/1/1988(H7N9))]	ENSP00000449012|AC226496.1	1	GO:0005975|carbohydrate metabolic process
H7N9|>gi|115278578|gb|ABI84697.1| neuraminidase [Influenza A virus (A/turkey/Minnesota/1/1988(H7N9))]	ENSP00000449022|MGAT4C	1	GO:0005975|carbohydrate metabolic process
H7N9|>gi|115278578|gb|ABI84697.1| neuraminidase [Influenza A virus (A/turkey/Minnesota/1/1988(H7N9))]	ENSP00000449172|MGAT4C	1	GO:0005975|carbohydrate metabolic process
H7N9|>gi|115278578|gb|ABI84697.1| neuraminidase [Influenza A virus (A/turkey/Minnesota/1/1988(H7N9))]	ENSP00000449426|PFKM	1	GO:0005975|carbohydrate metabolic process
H7N9|>gi|115278578|gb|ABI84697.1| neuraminidase [Influenza A virus (A/turkey/Minnesota/1/1988(H7N9))]	ENSP00000450079|RP11-480I12.4	1	GO:0005975|carbohydrate metabolic process
H7N9|>gi|115278578|gb|ABI84697.1| neuraminidase [Influenza A virus (A/turkey/Minnesota/1/1988(H7N9))]	ENSP00000450472|GALC	1	GO:0005975|carbohydrate metabolic process
H7N9|>gi|115278578|gb|ABI84697.1| neuraminidase [Influenza A virus (A/turkey/Minnesota/1/1988(H7N9))]	ENSP00000452314|GALC	1	GO:0005975|carbohydrate metabolic process
H7N9|>gi|115278578|gb|ABI84697.1| neuraminidase [Influenza A virus (A/turkey/Minnesota/1/1988(H7N9))]	ENSP00000452631|MAN2A2	1	GO:0005975|carbohydrate metabolic process
H7N9|>gi|115278578|gb|ABI84697.1| neuraminidase [Influenza A virus (A/turkey/Minnesota/1/1988(H7N9))]	ENSP00000452741|GCNT3	1	GO:0005975|carbohydrate metabolic process
H7N9|>gi|115278578|gb|ABI84697.1| neuraminidase [Influenza A virus (A/turkey/Minnesota/1/1988(H7N9))]	ENSP00000452813|MAN2A2	1	GO:0005975|carbohydrate metabolic process
H7N9|>gi|115278578|gb|ABI84697.1| neuraminidase [Influenza A virus (A/turkey/Minnesota/1/1988(H7N9))]	ENSP00000452866|MAN2A2	1	GO:0005975|carbohydrate metabolic process
H7N9|>gi|115278578|gb|ABI84697.1| neuraminidase [Influenza A virus (A/turkey/Minnesota/1/1988(H7N9))]	ENSP00000452897|MAN2A2	1	GO:0005975|carbohydrate metabolic process
H7N9|>gi|115278578|gb|ABI84697.1| neuraminidase [Influenza A virus (A/turkey/Minnesota/1/1988(H7N9))]	ENSP00000452928|MAN2A2	1	GO:0005975|carbohydrate metabolic process
H7N9|>gi|115278578|gb|ABI84697.1| neuraminidase [Influenza A virus (A/turkey/Minnesota/1/1988(H7N9))]	ENSP00000452948|MAN2A2	1	GO:0005975|carbohydrate metabolic process
H7N9|>gi|115278578|gb|ABI84697.1| neuraminidase [Influenza A virus (A/turkey/Minnesota/1/1988(H7N9))]	ENSP00000453129|GALK2	1	GO:0005975|carbohydrate metabolic process
H7N9|>gi|115278578|gb|ABI84697.1| neuraminidase [Influenza A virus (A/turkey/Minnesota/1/1988(H7N9))]	ENSP00000453140|MAN2A2	1	GO:0005975|carbohydrate metabolic process
H7N9|>gi|115278578|gb|ABI84697.1| neuraminidase [Influenza A virus (A/turkey/Minnesota/1/1988(H7N9))]	ENSP00000453253|MAN2A2	1	GO:0005975|carbohydrate metabolic process
H7N9|>gi|115278578|gb|ABI84697.1| neuraminidase [Influenza A virus (A/turkey/Minnesota/1/1988(H7N9))]	ENSP00000453341|MAN2A2	1	GO:0005975|carbohydrate metabolic process
H7N9|>gi|115278578|gb|ABI84697.1| neuraminidase [Influenza A virus (A/turkey/Minnesota/1/1988(H7N9))]	ENSP00000453659|MAN2A2	1	GO:0005975|carbohydrate metabolic process
H7N9|>gi|115278578|gb|ABI84697.1| neuraminidase [Influenza A virus (A/turkey/Minnesota/1/1988(H7N9))]	ENSP00000453999|MAN2A2	1	GO:0005975|carbohydrate metabolic process
H7N9|>gi|115278578|gb|ABI84697.1| neuraminidase [Influenza A virus (A/turkey/Minnesota/1/1988(H7N9))]	ENSP00000454257|MGAM	1	GO:0005975|carbohydrate metabolic process
H7N9|>gi|115278578|gb|ABI84697.1| neuraminidase [Influenza A virus (A/turkey/Minnesota/1/1988(H7N9))]	ENSP00000454312|MPI	1	GO:0005975|carbohydrate metabolic process
H7N9|>gi|115278578|gb|ABI84697.1| neuraminidase [Influenza A virus (A/turkey/Minnesota/1/1988(H7N9))]	ENSP00000454449|GANC	1	GO:0005975|carbohydrate metabolic process
H7N9|>gi|115278578|gb|ABI84697.1| neuraminidase [Influenza A virus (A/turkey/Minnesota/1/1988(H7N9))]	ENSP00000454578|GANC	1	GO:0005975|carbohydrate metabolic process
H7N9|>gi|115278578|gb|ABI84697.1| neuraminidase [Influenza A virus (A/turkey/Minnesota/1/1988(H7N9))]	ENSP00000454589|MAN2C1	1	GO:0005975|carbohydrate metabolic process
H7N9|>gi|115278578|gb|ABI84697.1| neuraminidase [Influenza A virus (A/turkey/Minnesota/1/1988(H7N9))]	ENSP00000454619|MPI	1	GO:0005975|carbohydrate metabolic process
H7N9|>gi|115278578|gb|ABI84697.1| neuraminidase [Influenza A virus (A/turkey/Minnesota/1/1988(H7N9))]	ENSP00000454622|MPI	1	GO:0005975|carbohydrate metabolic process
H7N9|>gi|115278578|gb|ABI84697.1| neuraminidase [Influenza A virus (A/turkey/Minnesota/1/1988(H7N9))]	ENSP00000454689|MGAM	1	GO:0005975|carbohydrate metabolic process
H7N9|>gi|115278578|gb|ABI84697.1| neuraminidase [Influenza A virus (A/turkey/Minnesota/1/1988(H7N9))]	ENSP00000454731|HAS3	1	GO:0005975|carbohydrate metabolic process
H7N9|>gi|115278578|gb|ABI84697.1| neuraminidase [Influenza A virus (A/turkey/Minnesota/1/1988(H7N9))]	ENSP00000454747|GANC	1	GO:0005975|carbohydrate metabolic process
H7N9|>gi|115278578|gb|ABI84697.1| neuraminidase [Influenza A virus (A/turkey/Minnesota/1/1988(H7N9))]	ENSP00000455065|MPI	1	GO:0005975|carbohydrate metabolic process
H7N9|>gi|115278578|gb|ABI84697.1| neuraminidase [Influenza A virus (A/turkey/Minnesota/1/1988(H7N9))]	ENSP00000455114|HEXA	1	GO:0005975|carbohydrate metabolic process
H7N9|>gi|115278578|gb|ABI84697.1| neuraminidase [Influenza A virus (A/turkey/Minnesota/1/1988(H7N9))]	ENSP00000455161|MPI	1	GO:0005975|carbohydrate metabolic process
H7N9|>gi|115278578|gb|ABI84697.1| neuraminidase [Influenza A virus (A/turkey/Minnesota/1/1988(H7N9))]	ENSP00000455241|MPI	1	GO:0005975|carbohydrate metabolic process
H7N9|>gi|115278578|gb|ABI84697.1| neuraminidase [Influenza A virus (A/turkey/Minnesota/1/1988(H7N9))]	ENSP00000455383|MPI	1	GO:0005975|carbohydrate metabolic process
H7N9|>gi|115278578|gb|ABI84697.1| neuraminidase [Influenza A virus (A/turkey/Minnesota/1/1988(H7N9))]	ENSP00000455405|MPI	1	GO:0005975|carbohydrate metabolic process
H7N9|>gi|115278578|gb|ABI84697.1| neuraminidase [Influenza A virus (A/turkey/Minnesota/1/1988(H7N9))]	ENSP00000455477|MPI	1	GO:0005975|carbohydrate metabolic process
H7N9|>gi|115278578|gb|ABI84697.1| neuraminidase [Influenza A virus (A/turkey/Minnesota/1/1988(H7N9))]	ENSP00000455607|PHKG2	1	GO:0005975|carbohydrate metabolic process
H7N9|>gi|115278578|gb|ABI84697.1| neuraminidase [Influenza A virus (A/turkey/Minnesota/1/1988(H7N9))]	ENSP00000455700|ALDOA	1	GO:0005975|carbohydrate metabolic process
H7N9|>gi|115278578|gb|ABI84697.1| neuraminidase [Influenza A virus (A/turkey/Minnesota/1/1988(H7N9))]	ENSP00000455724|ALDOA	1	GO:0005975|carbohydrate metabolic process
H7N9|>gi|115278578|gb|ABI84697.1| neuraminidase [Influenza A virus (A/turkey/Minnesota/1/1988(H7N9))]	ENSP00000455736|PKM	1	GO:0005975|carbohydrate metabolic process
H7N9|>gi|115278578|gb|ABI84697.1| neuraminidase [Influenza A virus (A/turkey/Minnesota/1/1988(H7N9))]	ENSP00000455793|LCTL	1	GO:0005975|carbohydrate metabolic process
H7N9|>gi|115278578|gb|ABI84697.1| neuraminidase [Influenza A virus (A/turkey/Minnesota/1/1988(H7N9))]	ENSP00000455800|ALDOA	1	GO:0005975|carbohydrate metabolic process
H7N9|>gi|115278578|gb|ABI84697.1| neuraminidase [Influenza A virus (A/turkey/Minnesota/1/1988(H7N9))]	ENSP00000455900|NAGPA	1	GO:0005975|carbohydrate metabolic process
H7N9|>gi|115278578|gb|ABI84697.1| neuraminidase [Influenza A virus (A/turkey/Minnesota/1/1988(H7N9))]	ENSP00000455901|PKM	1	GO:0005975|carbohydrate metabolic process
H7N9|>gi|115278578|gb|ABI84697.1| neuraminidase [Influenza A virus (A/turkey/Minnesota/1/1988(H7N9))]	ENSP00000455917|ALDOA	1	GO:0005975|carbohydrate metabolic process
H7N9|>gi|115278578|gb|ABI84697.1| neuraminidase [Influenza A virus (A/turkey/Minnesota/1/1988(H7N9))]	ENSP00000455935|MGAM	1	GO:0005975|carbohydrate metabolic process
H7N9|>gi|115278578|gb|ABI84697.1| neuraminidase [Influenza A virus (A/turkey/Minnesota/1/1988(H7N9))]	ENSP00000455972|MPI	1	GO:0005975|carbohydrate metabolic process
H7N9|>gi|115278578|gb|ABI84697.1| neuraminidase [Influenza A virus (A/turkey/Minnesota/1/1988(H7N9))]	ENSP00000455998|MAN2C1	1	GO:0005975|carbohydrate metabolic process
H7N9|>gi|115278578|gb|ABI84697.1| neuraminidase [Influenza A virus (A/turkey/Minnesota/1/1988(H7N9))]	ENSP00000456134|MGAM	1	GO:0005975|carbohydrate metabolic process
H7N9|>gi|115278578|gb|ABI84697.1| neuraminidase [Influenza A virus (A/turkey/Minnesota/1/1988(H7N9))]	ENSP00000456387|ADPGK	1	GO:0005975|carbohydrate metabolic process
H7N9|>gi|115278578|gb|ABI84697.1| neuraminidase [Influenza A virus (A/turkey/Minnesota/1/1988(H7N9))]	ENSP00000456489|HEXA	1	GO:0005975|carbohydrate metabolic process
H7N9|>gi|115278578|gb|ABI84697.1| neuraminidase [Influenza A virus (A/turkey/Minnesota/1/1988(H7N9))]	ENSP00000456729|PHKB	1	GO:0005975|carbohydrate metabolic process
H7N9|>gi|115278578|gb|ABI84697.1| neuraminidase [Influenza A virus (A/turkey/Minnesota/1/1988(H7N9))]	ENSP00000456970|PKM	1	GO:0005975|carbohydrate metabolic process
H7N9|>gi|115278578|gb|ABI84697.1| neuraminidase [Influenza A virus (A/turkey/Minnesota/1/1988(H7N9))]	ENSP00000457013|MPI	1	GO:0005975|carbohydrate metabolic process
H7N9|>gi|115278578|gb|ABI84697.1| neuraminidase [Influenza A virus (A/turkey/Minnesota/1/1988(H7N9))]	ENSP00000457020|MPI	1	GO:0005975|carbohydrate metabolic process
H7N9|>gi|115278578|gb|ABI84697.1| neuraminidase [Influenza A virus (A/turkey/Minnesota/1/1988(H7N9))]	ENSP00000457125|HEXA	1	GO:0005975|carbohydrate metabolic process
H7N9|>gi|115278578|gb|ABI84697.1| neuraminidase [Influenza A virus (A/turkey/Minnesota/1/1988(H7N9))]	ENSP00000457447|ADPGK	1	GO:0005975|carbohydrate metabolic process
H7N9|>gi|115278578|gb|ABI84697.1| neuraminidase [Influenza A virus (A/turkey/Minnesota/1/1988(H7N9))]	ENSP00000457459|PGP	1	GO:0005975|carbohydrate metabolic process
H7N9|>gi|115278578|gb|ABI84697.1| neuraminidase [Influenza A virus (A/turkey/Minnesota/1/1988(H7N9))]	ENSP00000457468|ALDOA	1	GO:0005975|carbohydrate metabolic process
H7N9|>gi|115278578|gb|ABI84697.1| neuraminidase [Influenza A virus (A/turkey/Minnesota/1/1988(H7N9))]	ENSP00000457494|MPI	1	GO:0005975|carbohydrate metabolic process
H7N9|>gi|115278578|gb|ABI84697.1| neuraminidase [Influenza A virus (A/turkey/Minnesota/1/1988(H7N9))]	ENSP00000457521|HEXA	1	GO:0005975|carbohydrate metabolic process
H7N9|>gi|115278578|gb|ABI84697.1| neuraminidase [Influenza A virus (A/turkey/Minnesota/1/1988(H7N9))]	ENSP00000457619|MPI	1	GO:0005975|carbohydrate metabolic process
H7N9|>gi|115278578|gb|ABI84697.1| neuraminidase [Influenza A virus (A/turkey/Minnesota/1/1988(H7N9))]	ENSP00000457788|MAN2C1	1	GO:0005975|carbohydrate metabolic process
H7N9|>gi|115278578|gb|ABI84697.1| neuraminidase [Influenza A virus (A/turkey/Minnesota/1/1988(H7N9))]	ENSP00000457885|MPI	1	GO:0005975|carbohydrate metabolic process
H7N9|>gi|115278578|gb|ABI84697.1| neuraminidase [Influenza A virus (A/turkey/Minnesota/1/1988(H7N9))]	ENSP00000458039|NUP93	1	GO:0005975|carbohydrate metabolic process
H7N9|>gi|115278578|gb|ABI84697.1| neuraminidase [Influenza A virus (A/turkey/Minnesota/1/1988(H7N9))]	ENSP00000458171|HYAL3	1	GO:0005975|carbohydrate metabolic process
H7N9|>gi|115278578|gb|ABI84697.1| neuraminidase [Influenza A virus (A/turkey/Minnesota/1/1988(H7N9))]	ENSP00000458306|GAA	1	GO:0005975|carbohydrate metabolic process
H7N9|>gi|115278578|gb|ABI84697.1| neuraminidase [Influenza A virus (A/turkey/Minnesota/1/1988(H7N9))]	ENSP00000458609|HYAL1	1	GO:0005975|carbohydrate metabolic process
H7N9|>gi|115278578|gb|ABI84697.1| neuraminidase [Influenza A virus (A/turkey/Minnesota/1/1988(H7N9))]	ENSP00000458620|HYAL3	1	GO:0005975|carbohydrate metabolic process
H7N9|>gi|115278578|gb|ABI84697.1| neuraminidase [Influenza A virus (A/turkey/Minnesota/1/1988(H7N9))]	ENSP00000458712|AP003392.1	1	GO:0005975|carbohydrate metabolic process
H7N9|>gi|115278578|gb|ABI84697.1| neuraminidase [Influenza A virus (A/turkey/Minnesota/1/1988(H7N9))]	ENSP00000458862|HYAL2	1	GO:0005975|carbohydrate metabolic process
H7N9|>gi|115278578|gb|ABI84697.1| neuraminidase [Influenza A virus (A/turkey/Minnesota/1/1988(H7N9))]	ENSP00000458863|HYAL2	1	GO:0005975|carbohydrate metabolic process
H7N9|>gi|115278578|gb|ABI84697.1| neuraminidase [Influenza A virus (A/turkey/Minnesota/1/1988(H7N9))]	ENSP00000458926|HYAL2	1	GO:0005975|carbohydrate metabolic process
H7N9|>gi|115278578|gb|ABI84697.1| neuraminidase [Influenza A virus (A/turkey/Minnesota/1/1988(H7N9))]	ENSP00000458954|NUP88	1	GO:0005975|carbohydrate metabolic process
H7N9|>gi|115278578|gb|ABI84697.1| neuraminidase [Influenza A virus (A/turkey/Minnesota/1/1988(H7N9))]	ENSP00000459254|HYAL1	1	GO:0005975|carbohydrate metabolic process
H7N9|>gi|115278578|gb|ABI84697.1| neuraminidase [Influenza A virus (A/turkey/Minnesota/1/1988(H7N9))]	ENSP00000459256|HYAL1	1	GO:0005975|carbohydrate metabolic process
H7N9|>gi|115278578|gb|ABI84697.1| neuraminidase [Influenza A virus (A/turkey/Minnesota/1/1988(H7N9))]	ENSP00000459311|HYAL1	1	GO:0005975|carbohydrate metabolic process
H7N9|>gi|115278578|gb|ABI84697.1| neuraminidase [Influenza A virus (A/turkey/Minnesota/1/1988(H7N9))]	ENSP00000459361|HYAL3	1	GO:0005975|carbohydrate metabolic process
H7N9|>gi|115278578|gb|ABI84697.1| neuraminidase [Influenza A virus (A/turkey/Minnesota/1/1988(H7N9))]	ENSP00000459478|HYAL3	1	GO:0005975|carbohydrate metabolic process
H7N9|>gi|115278578|gb|ABI84697.1| neuraminidase [Influenza A virus (A/turkey/Minnesota/1/1988(H7N9))]	ENSP00000459607|POM121	1	GO:0005975|carbohydrate metabolic process
H7N9|>gi|115278578|gb|ABI84697.1| neuraminidase [Influenza A virus (A/turkey/Minnesota/1/1988(H7N9))]	ENSP00000459906|HYAL1	1	GO:0005975|carbohydrate metabolic process
H7N9|>gi|115278578|gb|ABI84697.1| neuraminidase [Influenza A virus (A/turkey/Minnesota/1/1988(H7N9))]	ENSP00000459911|MDH2	1	GO:0005975|carbohydrate metabolic process
H7N9|>gi|115278578|gb|ABI84697.1| neuraminidase [Influenza A virus (A/turkey/Minnesota/1/1988(H7N9))]	ENSP00000459921|PKLR	1	GO:0005975|carbohydrate metabolic process
H7N9|>gi|115278578|gb|ABI84697.1| neuraminidase [Influenza A virus (A/turkey/Minnesota/1/1988(H7N9))]	ENSP00000459923|RP11-1220K2.2	1	GO:0005975|carbohydrate metabolic process
H7N9|>gi|115278578|gb|ABI84697.1| neuraminidase [Influenza A virus (A/turkey/Minnesota/1/1988(H7N9))]	ENSP00000459972|GAA	1	GO:0005975|carbohydrate metabolic process
H7N9|>gi|115278578|gb|ABI84697.1| neuraminidase [Influenza A virus (A/turkey/Minnesota/1/1988(H7N9))]	ENSP00000459986|HYAL2	1	GO:0005975|carbohydrate metabolic process
H7N9|>gi|115278578|gb|ABI84697.1| neuraminidase [Influenza A virus (A/turkey/Minnesota/1/1988(H7N9))]	ENSP00000460347|HYAL2	1	GO:0005975|carbohydrate metabolic process
H7N9|>gi|115278578|gb|ABI84697.1| neuraminidase [Influenza A virus (A/turkey/Minnesota/1/1988(H7N9))]	ENSP00000460460|HYAL2	1	GO:0005975|carbohydrate metabolic process
H7N9|>gi|115278578|gb|ABI84697.1| neuraminidase [Influenza A virus (A/turkey/Minnesota/1/1988(H7N9))]	ENSP00000460543|GAA	1	GO:0005975|carbohydrate metabolic process
H7N9|>gi|115278578|gb|ABI84697.1| neuraminidase [Influenza A virus (A/turkey/Minnesota/1/1988(H7N9))]	ENSP00000460624|HYAL1	1	GO:0005975|carbohydrate metabolic process
H7N9|>gi|115278578|gb|ABI84697.1| neuraminidase [Influenza A virus (A/turkey/Minnesota/1/1988(H7N9))]	ENSP00000460645|HYAL3	1	GO:0005975|carbohydrate metabolic process
H7N9|>gi|115278578|gb|ABI84697.1| neuraminidase [Influenza A virus (A/turkey/Minnesota/1/1988(H7N9))]	ENSP00000460809|HYAL3	1	GO:0005975|carbohydrate metabolic process
H7N9|>gi|115278578|gb|ABI84697.1| neuraminidase [Influenza A virus (A/turkey/Minnesota/1/1988(H7N9))]	ENSP00000460810|MDH2	1	GO:0005975|carbohydrate metabolic process
H7N9|>gi|115278578|gb|ABI84697.1| neuraminidase [Influenza A virus (A/turkey/Minnesota/1/1988(H7N9))]	ENSP00000460851|HYAL2	1	GO:0005975|carbohydrate metabolic process
H7N9|>gi|115278578|gb|ABI84697.1| neuraminidase [Influenza A virus (A/turkey/Minnesota/1/1988(H7N9))]	ENSP00000460938|HYAL2	1	GO:0005975|carbohydrate metabolic process
H7N9|>gi|115278578|gb|ABI84697.1| neuraminidase [Influenza A virus (A/turkey/Minnesota/1/1988(H7N9))]	ENSP00000461016|RP11-1220K2.2	1	GO:0005975|carbohydrate metabolic process
H7N9|>gi|115278578|gb|ABI84697.1| neuraminidase [Influenza A virus (A/turkey/Minnesota/1/1988(H7N9))]	ENSP00000461218|MDH2	1	GO:0005975|carbohydrate metabolic process
H7N9|>gi|115278578|gb|ABI84697.1| neuraminidase [Influenza A virus (A/turkey/Minnesota/1/1988(H7N9))]	ENSP00000461261|HYAL1	1	GO:0005975|carbohydrate metabolic process
H7N9|>gi|115278578|gb|ABI84697.1| neuraminidase [Influenza A virus (A/turkey/Minnesota/1/1988(H7N9))]	ENSP00000461344|AP003392.1	1	GO:0005975|carbohydrate metabolic process
H7N9|>gi|115278578|gb|ABI84697.1| neuraminidase [Influenza A virus (A/turkey/Minnesota/1/1988(H7N9))]	ENSP00000461372|HYAL2	1	GO:0005975|carbohydrate metabolic process
H7N9|>gi|115278578|gb|ABI84697.1| neuraminidase [Influenza A virus (A/turkey/Minnesota/1/1988(H7N9))]	ENSP00000461416|RP11-235E17.2	1	GO:0005975|carbohydrate metabolic process
H7N9|>gi|115278578|gb|ABI84697.1| neuraminidase [Influenza A virus (A/turkey/Minnesota/1/1988(H7N9))]	ENSP00000461775|G6PC2	1	GO:0005975|carbohydrate metabolic process
H7N9|>gi|115278578|gb|ABI84697.1| neuraminidase [Influenza A virus (A/turkey/Minnesota/1/1988(H7N9))]	ENSP00000461839|CHST4	1	GO:0005975|carbohydrate metabolic process
H7N9|>gi|115278578|gb|ABI84697.1| neuraminidase [Influenza A virus (A/turkey/Minnesota/1/1988(H7N9))]	ENSP00000461900|HYAL1	1	GO:0005975|carbohydrate metabolic process
H7N9|>gi|115278578|gb|ABI84697.1| neuraminidase [Influenza A virus (A/turkey/Minnesota/1/1988(H7N9))]	ENSP00000462303|HEXDC	1	GO:0005975|carbohydrate metabolic process
H7N9|>gi|115278578|gb|ABI84697.1| neuraminidase [Influenza A virus (A/turkey/Minnesota/1/1988(H7N9))]	ENSP00000462856|HEXDC	1	GO:0005975|carbohydrate metabolic process
H7N9|>gi|115278578|gb|ABI84697.1| neuraminidase [Influenza A virus (A/turkey/Minnesota/1/1988(H7N9))]	ENSP00000463129|HEXDC	1	GO:0005975|carbohydrate metabolic process
H7N9|>gi|115278578|gb|ABI84697.1| neuraminidase [Influenza A virus (A/turkey/Minnesota/1/1988(H7N9))]	ENSP00000463260|FGGY	1	GO:0005975|carbohydrate metabolic process
H7N9|>gi|115278578|gb|ABI84697.1| neuraminidase [Influenza A virus (A/turkey/Minnesota/1/1988(H7N9))]	ENSP00000463625|HEXDC	1	GO:0005975|carbohydrate metabolic process
H7N9|>gi|115278578|gb|ABI84697.1| neuraminidase [Influenza A virus (A/turkey/Minnesota/1/1988(H7N9))]	ENSP00000463663|PGM5	1	GO:0005975|carbohydrate metabolic process
H7N9|>gi|115278578|gb|ABI84697.1| neuraminidase [Influenza A virus (A/turkey/Minnesota/1/1988(H7N9))]	ENSP00000464113|PGM5	1	GO:0005975|carbohydrate metabolic process
H7N9|>gi|115278578|gb|ABI84697.1| neuraminidase [Influenza A virus (A/turkey/Minnesota/1/1988(H7N9))]	ENSP00000464667|PGM5	1	GO:0005975|carbohydrate metabolic process
H7N9|>gi|115278583|gb|ABI84700.1| nonstructural protein 2 [Influenza A virus (A/turkey/Minnesota/1/1988(H7N9))]	ENSP00000254998|NXT1	1	GO:0006405|RNA export from nucleus
H7N9|>gi|115278583|gb|ABI84700.1| nonstructural protein 2 [Influenza A virus (A/turkey/Minnesota/1/1988(H7N9))]	ENSP00000294172|NXF1	1	GO:0006405|RNA export from nucleus
H7N9|>gi|115278583|gb|ABI84700.1| nonstructural protein 2 [Influenza A virus (A/turkey/Minnesota/1/1988(H7N9))]	ENSP00000341826|HNRNPA1	1	GO:0006405|RNA export from nucleus
H7N9|>gi|115278583|gb|ABI84700.1| nonstructural protein 2 [Influenza A virus (A/turkey/Minnesota/1/1988(H7N9))]	ENSP00000376176|RAN	1	GO:0006405|RNA export from nucleus
H7N9|>gi|115278583|gb|ABI84700.1| nonstructural protein 2 [Influenza A virus (A/turkey/Minnesota/1/1988(H7N9))]	ENSP00000391986|HNRNPA1	1	GO:0006405|RNA export from nucleus
H7N9|>gi|115278583|gb|ABI84700.1| nonstructural protein 2 [Influenza A virus (A/turkey/Minnesota/1/1988(H7N9))]	ENSP00000395244|TMEM229A	1	GO:0042025|host cell nucleus
H7N9|>gi|115278583|gb|ABI84700.1| nonstructural protein 2 [Influenza A virus (A/turkey/Minnesota/1/1988(H7N9))]	ENSP00000396127|RAN	1	GO:0006405|RNA export from nucleus
H7N9|>gi|115278583|gb|ABI84700.1| nonstructural protein 2 [Influenza A virus (A/turkey/Minnesota/1/1988(H7N9))]	ENSP00000446215|RAN	1	GO:0006405|RNA export from nucleus
H7N9|>gi|115278583|gb|ABI84700.1| nonstructural protein 2 [Influenza A virus (A/turkey/Minnesota/1/1988(H7N9))]	ENSP00000447260|HNRNPA1	1	GO:0006405|RNA export from nucleus
H7N9|>gi|115278583|gb|ABI84700.1| nonstructural protein 2 [Influenza A virus (A/turkey/Minnesota/1/1988(H7N9))]	ENSP00000448617|HNRNPA1	1	GO:0006405|RNA export from nucleus
H7N9|>gi|115278583|gb|ABI84700.1| nonstructural protein 2 [Influenza A virus (A/turkey/Minnesota/1/1988(H7N9))]	ENSP00000449913|HNRNPA1	1	GO:0006405|RNA export from nucleus
H7N9|>gi|307141883|gb|ADN34735.1| polymerase PB1 [Influenza A virus (A/Anas crecca/Spain/1460/2008(H7N9))]	ENSP00000204801|CD209	1	GO:0019079|viral genome replication
H7N9|>gi|307141883|gb|ADN34735.1| polymerase PB1 [Influenza A virus (A/Anas crecca/Spain/1460/2008(H7N9))]	ENSP00000218364|HTATSF1	1	GO:0019079|viral genome replication
H7N9|>gi|307141883|gb|ADN34735.1| polymerase PB1 [Influenza A virus (A/Anas crecca/Spain/1460/2008(H7N9))]	ENSP00000225831|CCL2	1	GO:0019079|viral genome replication
H7N9|>gi|307141883|gb|ADN34735.1| polymerase PB1 [Influenza A virus (A/Anas crecca/Spain/1460/2008(H7N9))]	ENSP00000244776|DEK	1	GO:0019079|viral genome replication
H7N9|>gi|307141883|gb|ADN34735.1| polymerase PB1 [Influenza A virus (A/Anas crecca/Spain/1460/2008(H7N9))]	ENSP00000256644|HBXIP	1	GO:0019079|viral genome replication
H7N9|>gi|307141883|gb|ADN34735.1| polymerase PB1 [Influenza A virus (A/Anas crecca/Spain/1460/2008(H7N9))]	ENSP00000283628|UBP1	1	GO:0019079|viral genome replication
H7N9|>gi|307141883|gb|ADN34735.1| polymerase PB1 [Influenza A virus (A/Anas crecca/Spain/1460/2008(H7N9))]	ENSP00000283629|UBP1	1	GO:0019079|viral genome replication
H7N9|>gi|307141883|gb|ADN34735.1| polymerase PB1 [Influenza A virus (A/Anas crecca/Spain/1460/2008(H7N9))]	ENSP00000290921|CTBP1	1	GO:0019079|viral genome replication
H7N9|>gi|307141883|gb|ADN34735.1| polymerase PB1 [Influenza A virus (A/Anas crecca/Spain/1460/2008(H7N9))]	ENSP00000301357|CD209	1	GO:0019079|viral genome replication
H7N9|>gi|307141883|gb|ADN34735.1| polymerase PB1 [Influenza A virus (A/Anas crecca/Spain/1460/2008(H7N9))]	ENSP00000304414|CXCR6	1	GO:0019079|viral genome replication
H7N9|>gi|307141883|gb|ADN34735.1| polymerase PB1 [Influenza A virus (A/Anas crecca/Spain/1460/2008(H7N9))]	ENSP00000311825|CTBP2	1	GO:0019079|viral genome replication
H7N9|>gi|307141883|gb|ADN34735.1| polymerase PB1 [Influenza A virus (A/Anas crecca/Spain/1460/2008(H7N9))]	ENSP00000314949|POLR2A	1	GO:0003968|RNA-directed RNA polymerase activity
H7N9|>gi|307141883|gb|ADN34735.1| polymerase PB1 [Influenza A virus (A/Anas crecca/Spain/1460/2008(H7N9))]	ENSP00000315407|CD209	1	GO:0019079|viral genome replication
H7N9|>gi|307141883|gb|ADN34735.1| polymerase PB1 [Influenza A virus (A/Anas crecca/Spain/1460/2008(H7N9))]	ENSP00000315477|CD209	1	GO:0019079|viral genome replication
H7N9|>gi|307141883|gb|ADN34735.1| polymerase PB1 [Influenza A virus (A/Anas crecca/Spain/1460/2008(H7N9))]	ENSP00000316228|CLEC4M	1	GO:0019079|viral genome replication
H7N9|>gi|307141883|gb|ADN34735.1| polymerase PB1 [Influenza A virus (A/Anas crecca/Spain/1460/2008(H7N9))]	ENSP00000331831|GAS6	1	GO:0019079|viral genome replication
H7N9|>gi|307141883|gb|ADN34735.1| polymerase PB1 [Influenza A virus (A/Anas crecca/Spain/1460/2008(H7N9))]	ENSP00000338615|CTBP2	1	GO:0019079|viral genome replication
H7N9|>gi|307141883|gb|ADN34735.1| polymerase PB1 [Influenza A virus (A/Anas crecca/Spain/1460/2008(H7N9))]	ENSP00000346373|CD209	1	GO:0019079|viral genome replication
H7N9|>gi|307141883|gb|ADN34735.1| polymerase PB1 [Influenza A virus (A/Anas crecca/Spain/1460/2008(H7N9))]	ENSP00000348003|GAS6	1	GO:0019079|viral genome replication
H7N9|>gi|307141883|gb|ADN34735.1| polymerase PB1 [Influenza A virus (A/Anas crecca/Spain/1460/2008(H7N9))]	ENSP00000349924|CLEC4M	1	GO:0019079|viral genome replication
H7N9|>gi|307141883|gb|ADN34735.1| polymerase PB1 [Influenza A virus (A/Anas crecca/Spain/1460/2008(H7N9))]	ENSP00000349962|GAS6	1	GO:0019079|viral genome replication
H7N9|>gi|307141883|gb|ADN34735.1| polymerase PB1 [Influenza A virus (A/Anas crecca/Spain/1460/2008(H7N9))]	ENSP00000351954|CLEC4M	1	GO:0019079|viral genome replication
H7N9|>gi|307141883|gb|ADN34735.1| polymerase PB1 [Influenza A virus (A/Anas crecca/Spain/1460/2008(H7N9))]	ENSP00000360231|NFIA	1	GO:0019079|viral genome replication
H7N9|>gi|307141883|gb|ADN34735.1| polymerase PB1 [Influenza A virus (A/Anas crecca/Spain/1460/2008(H7N9))]	ENSP00000372411|CTBP1	1	GO:0019079|viral genome replication
H7N9|>gi|307141883|gb|ADN34735.1| polymerase PB1 [Influenza A virus (A/Anas crecca/Spain/1460/2008(H7N9))]	ENSP00000377716|CD209	1	GO:0019079|viral genome replication
H7N9|>gi|307141883|gb|ADN34735.1| polymerase PB1 [Influenza A virus (A/Anas crecca/Spain/1460/2008(H7N9))]	ENSP00000380414|DEK	1	GO:0019079|viral genome replication
H7N9|>gi|307141883|gb|ADN34735.1| polymerase PB1 [Influenza A virus (A/Anas crecca/Spain/1460/2008(H7N9))]	ENSP00000384523|NFIA	1	GO:0019079|viral genome replication
H7N9|>gi|307141883|gb|ADN34735.1| polymerase PB1 [Influenza A virus (A/Anas crecca/Spain/1460/2008(H7N9))]	ENSP00000395558|UBP1	1	GO:0019079|viral genome replication
H7N9|>gi|307141883|gb|ADN34735.1| polymerase PB1 [Influenza A virus (A/Anas crecca/Spain/1460/2008(H7N9))]	ENSP00000395704|CXCR6	1	GO:0019079|viral genome replication
H7N9|>gi|307141883|gb|ADN34735.1| polymerase PB1 [Influenza A virus (A/Anas crecca/Spain/1460/2008(H7N9))]	ENSP00000396218|CXCR6	1	GO:0019079|viral genome replication
H7N9|>gi|307141883|gb|ADN34735.1| polymerase PB1 [Influenza A virus (A/Anas crecca/Spain/1460/2008(H7N9))]	ENSP00000396886|CXCR6	1	GO:0019079|viral genome replication
H7N9|>gi|307141883|gb|ADN34735.1| polymerase PB1 [Influenza A virus (A/Anas crecca/Spain/1460/2008(H7N9))]	ENSP00000410474|CTBP2	1	GO:0019079|viral genome replication
H7N9|>gi|307141883|gb|ADN34735.1| polymerase PB1 [Influenza A virus (A/Anas crecca/Spain/1460/2008(H7N9))]	ENSP00000416498|GAS6	1	GO:0019079|viral genome replication
H7N9|>gi|307141883|gb|ADN34735.1| polymerase PB1 [Influenza A virus (A/Anas crecca/Spain/1460/2008(H7N9))]	ENSP00000419785|NFIA	1	GO:0019079|viral genome replication
H7N9|>gi|307141883|gb|ADN34735.1| polymerase PB1 [Influenza A virus (A/Anas crecca/Spain/1460/2008(H7N9))]	ENSP00000434630|CTBP2	1	GO:0019079|viral genome replication
H7N9|>gi|307141883|gb|ADN34735.1| polymerase PB1 [Influenza A virus (A/Anas crecca/Spain/1460/2008(H7N9))]	ENSP00000436285|CTBP2	1	GO:0019079|viral genome replication
H7N9|>gi|307141883|gb|ADN34735.1| polymerase PB1 [Influenza A virus (A/Anas crecca/Spain/1460/2008(H7N9))]	ENSP00000442699|HTATSF1	1	GO:0019079|viral genome replication
H7N9|>gi|312126097|gb|ADQ27996.1| polymerase PA [Influenza A virus (A/ruddy turnstone/DE/1538/2000(H7N9))]	ENSP00000007264|RPUSD1	1	GO:0003723|RNA binding
H7N9|>gi|312126097|gb|ADQ27996.1| polymerase PA [Influenza A virus (A/ruddy turnstone/DE/1538/2000(H7N9))]	ENSP00000009589|RPS20	1	GO:0003723|RNA binding
H7N9|>gi|312126097|gb|ADQ27996.1| polymerase PA [Influenza A virus (A/ruddy turnstone/DE/1538/2000(H7N9))]	ENSP00000014112|PTBP1	1	GO:0003723|RNA binding
H7N9|>gi|312126097|gb|ADQ27996.1| polymerase PA [Influenza A virus (A/ruddy turnstone/DE/1538/2000(H7N9))]	ENSP00000015877|ADARB1	1	GO:0003723|RNA binding
H7N9|>gi|312126097|gb|ADQ27996.1| polymerase PA [Influenza A virus (A/ruddy turnstone/DE/1538/2000(H7N9))]	ENSP00000028008|RNASET2	1	GO:0003723|RNA binding
H7N9|>gi|312126097|gb|ADQ27996.1| polymerase PA [Influenza A virus (A/ruddy turnstone/DE/1538/2000(H7N9))]	ENSP00000040877|TARBP1	1	GO:0003723|RNA binding
H7N9|>gi|312126097|gb|ADQ27996.1| polymerase PA [Influenza A virus (A/ruddy turnstone/DE/1538/2000(H7N9))]	ENSP00000072644|YIPF1	1	GO:0003723|RNA binding
H7N9|>gi|312126097|gb|ADQ27996.1| polymerase PA [Influenza A virus (A/ruddy turnstone/DE/1538/2000(H7N9))]	ENSP00000084795|RPL18	1	GO:0003723|RNA binding
H7N9|>gi|312126097|gb|ADQ27996.1| polymerase PA [Influenza A virus (A/ruddy turnstone/DE/1538/2000(H7N9))]	ENSP00000179765|BAZ2A	1	GO:0003723|RNA binding
H7N9|>gi|312126097|gb|ADQ27996.1| polymerase PA [Influenza A virus (A/ruddy turnstone/DE/1538/2000(H7N9))]	ENSP00000196169|TDRD3	1	GO:0003723|RNA binding
H7N9|>gi|312126097|gb|ADQ27996.1| polymerase PA [Influenza A virus (A/ruddy turnstone/DE/1538/2000(H7N9))]	ENSP00000196551|RPS5	1	GO:0003723|RNA binding
H7N9|>gi|312126097|gb|ADQ27996.1| polymerase PA [Influenza A virus (A/ruddy turnstone/DE/1538/2000(H7N9))]	ENSP00000198939|CHERP	1	GO:0003723|RNA binding
H7N9|>gi|312126097|gb|ADQ27996.1| polymerase PA [Influenza A virus (A/ruddy turnstone/DE/1538/2000(H7N9))]	ENSP00000199320|DIMT1	1	GO:0003723|RNA binding
H7N9|>gi|312126097|gb|ADQ27996.1| polymerase PA [Influenza A virus (A/ruddy turnstone/DE/1538/2000(H7N9))]	ENSP00000202773|RPL6	1	GO:0003723|RNA binding
H7N9|>gi|312126097|gb|ADQ27996.1| polymerase PA [Influenza A virus (A/ruddy turnstone/DE/1538/2000(H7N9))]	ENSP00000202917|OAS1	1	GO:0003723|RNA binding
H7N9|>gi|312126097|gb|ADQ27996.1| polymerase PA [Influenza A virus (A/ruddy turnstone/DE/1538/2000(H7N9))]	ENSP00000203616|RBM41	1	GO:0003723|RNA binding
H7N9|>gi|312126097|gb|ADQ27996.1| polymerase PA [Influenza A virus (A/ruddy turnstone/DE/1538/2000(H7N9))]	ENSP00000210227|PTBP3	1	GO:0003723|RNA binding
H7N9|>gi|312126097|gb|ADQ27996.1| polymerase PA [Influenza A virus (A/ruddy turnstone/DE/1538/2000(H7N9))]	ENSP00000211372|RPS18	1	GO:0003723|RNA binding
H7N9|>gi|312126097|gb|ADQ27996.1| polymerase PA [Influenza A virus (A/ruddy turnstone/DE/1538/2000(H7N9))]	ENSP00000215793|SF3A1	1	GO:0003723|RNA binding
H7N9|>gi|312126097|gb|ADQ27996.1| polymerase PA [Influenza A virus (A/ruddy turnstone/DE/1538/2000(H7N9))]	ENSP00000215956|NHP2L1	1	GO:0003723|RNA binding
H7N9|>gi|312126097|gb|ADQ27996.1| polymerase PA [Influenza A virus (A/ruddy turnstone/DE/1538/2000(H7N9))]	ENSP00000216277|PAPOLA	1	GO:0003723|RNA binding
H7N9|>gi|312126097|gb|ADQ27996.1| polymerase PA [Influenza A virus (A/ruddy turnstone/DE/1538/2000(H7N9))]	ENSP00000216714|APEX1	1	GO:0003723|RNA binding
H7N9|>gi|312126097|gb|ADQ27996.1| polymerase PA [Influenza A virus (A/ruddy turnstone/DE/1538/2000(H7N9))]	ENSP00000216727|PABPN1	1	GO:0003723|RNA binding
H7N9|>gi|312126097|gb|ADQ27996.1| polymerase PA [Influenza A virus (A/ruddy turnstone/DE/1538/2000(H7N9))]	ENSP00000217073|PABPC1L	1	GO:0003723|RNA binding
H7N9|>gi|312126097|gb|ADQ27996.1| polymerase PA [Influenza A virus (A/ruddy turnstone/DE/1538/2000(H7N9))]	ENSP00000217074|PABPC1L	1	GO:0003723|RNA binding
H7N9|>gi|312126097|gb|ADQ27996.1| polymerase PA [Influenza A virus (A/ruddy turnstone/DE/1538/2000(H7N9))]	ENSP00000217075|PABPC1L	1	GO:0003723|RNA binding
H7N9|>gi|312126097|gb|ADQ27996.1| polymerase PA [Influenza A virus (A/ruddy turnstone/DE/1538/2000(H7N9))]	ENSP00000217109|CSTF1	1	GO:0003723|RNA binding
H7N9|>gi|312126097|gb|ADQ27996.1| polymerase PA [Influenza A virus (A/ruddy turnstone/DE/1538/2000(H7N9))]	ENSP00000218032|TLR8	1	GO:0003723|RNA binding
H7N9|>gi|312126097|gb|ADQ27996.1| polymerase PA [Influenza A virus (A/ruddy turnstone/DE/1538/2000(H7N9))]	ENSP00000218200|FMR1	1	GO:0003723|RNA binding
H7N9|>gi|312126097|gb|ADQ27996.1| polymerase PA [Influenza A virus (A/ruddy turnstone/DE/1538/2000(H7N9))]	ENSP00000218364|HTATSF1	1	GO:0003723|RNA binding
H7N9|>gi|312126097|gb|ADQ27996.1| polymerase PA [Influenza A virus (A/ruddy turnstone/DE/1538/2000(H7N9))]	ENSP00000220496|DNAJC17	1	GO:0003723|RNA binding
H7N9|>gi|312126097|gb|ADQ27996.1| polymerase PA [Influenza A virus (A/ruddy turnstone/DE/1538/2000(H7N9))]	ENSP00000220592|EIF2C2	1	GO:0003723|RNA binding
H7N9|>gi|312126097|gb|ADQ27996.1| polymerase PA [Influenza A virus (A/ruddy turnstone/DE/1538/2000(H7N9))]	ENSP00000220959|UBR5	1	GO:0003723|RNA binding
H7N9|>gi|312126097|gb|ADQ27996.1| polymerase PA [Influenza A virus (A/ruddy turnstone/DE/1538/2000(H7N9))]	ENSP00000221233|EXOSC5	1	GO:0003723|RNA binding
H7N9|>gi|312126097|gb|ADQ27996.1| polymerase PA [Influenza A virus (A/ruddy turnstone/DE/1538/2000(H7N9))]	ENSP00000221419|HNRNPL	1	GO:0003723|RNA binding
H7N9|>gi|312126097|gb|ADQ27996.1| polymerase PA [Influenza A virus (A/ruddy turnstone/DE/1538/2000(H7N9))]	ENSP00000221448|SNRNP70	1	GO:0003723|RNA binding
H7N9|>gi|312126097|gb|ADQ27996.1| polymerase PA [Influenza A virus (A/ruddy turnstone/DE/1538/2000(H7N9))]	ENSP00000221486|RNASEH2A	1	GO:0003723|RNA binding
H7N9|>gi|312126097|gb|ADQ27996.1| polymerase PA [Influenza A virus (A/ruddy turnstone/DE/1538/2000(H7N9))]	ENSP00000221504|TRMT1	1	GO:0003723|RNA binding
H7N9|>gi|312126097|gb|ADQ27996.1| polymerase PA [Influenza A virus (A/ruddy turnstone/DE/1538/2000(H7N9))]	ENSP00000221770|POP4	1	GO:0003723|RNA binding
H7N9|>gi|312126097|gb|ADQ27996.1| polymerase PA [Influenza A virus (A/ruddy turnstone/DE/1538/2000(H7N9))]	ENSP00000221801|FBL	1	GO:0003723|RNA binding
H7N9|>gi|312126097|gb|ADQ27996.1| polymerase PA [Influenza A virus (A/ruddy turnstone/DE/1538/2000(H7N9))]	ENSP00000221975|RPS19	1	GO:0003723|RNA binding
H7N9|>gi|312126097|gb|ADQ27996.1| polymerase PA [Influenza A virus (A/ruddy turnstone/DE/1538/2000(H7N9))]	ENSP00000222247|RPL18A	1	GO:0003723|RNA binding
H7N9|>gi|312126097|gb|ADQ27996.1| polymerase PA [Influenza A virus (A/ruddy turnstone/DE/1538/2000(H7N9))]	ENSP00000222574|HBP1	1	GO:0003723|RNA binding
H7N9|>gi|312126097|gb|ADQ27996.1| polymerase PA [Influenza A virus (A/ruddy turnstone/DE/1538/2000(H7N9))]	ENSP00000223073|RBM28	1	GO:0003723|RNA binding
H7N9|>gi|312126097|gb|ADQ27996.1| polymerase PA [Influenza A virus (A/ruddy turnstone/DE/1538/2000(H7N9))]	ENSP00000223951|ELAVL2	1	GO:0003723|RNA binding
H7N9|>gi|312126097|gb|ADQ27996.1| polymerase PA [Influenza A virus (A/ruddy turnstone/DE/1538/2000(H7N9))]	ENSP00000225388|NUFIP2	1	GO:0003723|RNA binding
H7N9|>gi|312126097|gb|ADQ27996.1| polymerase PA [Influenza A virus (A/ruddy turnstone/DE/1538/2000(H7N9))]	ENSP00000225430|RPL19	1	GO:0003723|RNA binding
H7N9|>gi|312126097|gb|ADQ27996.1| polymerase PA [Influenza A virus (A/ruddy turnstone/DE/1538/2000(H7N9))]	ENSP00000227163|SPI1	1	GO:0003723|RNA binding
H7N9|>gi|312126097|gb|ADQ27996.1| polymerase PA [Influenza A virus (A/ruddy turnstone/DE/1538/2000(H7N9))]	ENSP00000227474|PUS3	1	GO:0003723|RNA binding
H7N9|>gi|312126097|gb|ADQ27996.1| polymerase PA [Influenza A virus (A/ruddy turnstone/DE/1538/2000(H7N9))]	ENSP00000227503|SF1	1	GO:0003723|RNA binding
H7N9|>gi|312126097|gb|ADQ27996.1| polymerase PA [Influenza A virus (A/ruddy turnstone/DE/1538/2000(H7N9))]	ENSP00000228264|DDX11	1	GO:0003723|RNA binding
H7N9|>gi|312126097|gb|ADQ27996.1| polymerase PA [Influenza A virus (A/ruddy turnstone/DE/1538/2000(H7N9))]	ENSP00000228284|SART3	1	GO:0003723|RNA binding
H7N9|>gi|312126097|gb|ADQ27996.1| polymerase PA [Influenza A virus (A/ruddy turnstone/DE/1538/2000(H7N9))]	ENSP00000228843|RAD51AP1	1	GO:0003723|RNA binding
H7N9|>gi|312126097|gb|ADQ27996.1| polymerase PA [Influenza A virus (A/ruddy turnstone/DE/1538/2000(H7N9))]	ENSP00000228928|OAS3	1	GO:0003723|RNA binding
H7N9|>gi|312126097|gb|ADQ27996.1| polymerase PA [Influenza A virus (A/ruddy turnstone/DE/1538/2000(H7N9))]	ENSP00000229003|ENDOU	1	GO:0003723|RNA binding
H7N9|>gi|312126097|gb|ADQ27996.1| polymerase PA [Influenza A virus (A/ruddy turnstone/DE/1538/2000(H7N9))]	ENSP00000229214|KRR1	1	GO:0003723|RNA binding
H7N9|>gi|312126097|gb|ADQ27996.1| polymerase PA [Influenza A virus (A/ruddy turnstone/DE/1538/2000(H7N9))]	ENSP00000229304|APOBEC1	1	GO:0003723|RNA binding
H7N9|>gi|312126097|gb|ADQ27996.1| polymerase PA [Influenza A virus (A/ruddy turnstone/DE/1538/2000(H7N9))]	ENSP00000229390|SRSF9	1	GO:0003723|RNA binding
H7N9|>gi|312126097|gb|ADQ27996.1| polymerase PA [Influenza A virus (A/ruddy turnstone/DE/1538/2000(H7N9))]	ENSP00000230301|C6orf118	1	GO:0003723|RNA binding
H7N9|>gi|312126097|gb|ADQ27996.1| polymerase PA [Influenza A virus (A/ruddy turnstone/DE/1538/2000(H7N9))]	ENSP00000232888|RRP9	1	GO:0003723|RNA binding
H7N9|>gi|312126097|gb|ADQ27996.1| polymerase PA [Influenza A virus (A/ruddy turnstone/DE/1538/2000(H7N9))]	ENSP00000233078|DAZAP1	1	GO:0003723|RNA binding
H7N9|>gi|312126097|gb|ADQ27996.1| polymerase PA [Influenza A virus (A/ruddy turnstone/DE/1538/2000(H7N9))]	ENSP00000233468|AC008073.5	1	GO:0003723|RNA binding
H7N9|>gi|312126097|gb|ADQ27996.1| polymerase PA [Influenza A virus (A/ruddy turnstone/DE/1538/2000(H7N9))]	ENSP00000233609|RPS15	1	GO:0003723|RNA binding
H7N9|>gi|312126097|gb|ADQ27996.1| polymerase PA [Influenza A virus (A/ruddy turnstone/DE/1538/2000(H7N9))]	ENSP00000234677|SARS	1	GO:0003723|RNA binding
H7N9|>gi|312126097|gb|ADQ27996.1| polymerase PA [Influenza A virus (A/ruddy turnstone/DE/1538/2000(H7N9))]	ENSP00000236228|PTBP2	1	GO:0003723|RNA binding
H7N9|>gi|312126097|gb|ADQ27996.1| polymerase PA [Influenza A virus (A/ruddy turnstone/DE/1538/2000(H7N9))]	ENSP00000236412|PPP1R8	1	GO:0003723|RNA binding
H7N9|>gi|312126097|gb|ADQ27996.1| polymerase PA [Influenza A virus (A/ruddy turnstone/DE/1538/2000(H7N9))]	ENSP00000238112|CPSF3	1	GO:0003723|RNA binding
H7N9|>gi|312126097|gb|ADQ27996.1| polymerase PA [Influenza A virus (A/ruddy turnstone/DE/1538/2000(H7N9))]	ENSP00000238146|DDX55	1	GO:0003723|RNA binding
H7N9|>gi|312126097|gb|ADQ27996.1| polymerase PA [Influenza A virus (A/ruddy turnstone/DE/1538/2000(H7N9))]	ENSP00000238688|SLIRP	1	GO:0003723|RNA binding
H7N9|>gi|312126097|gb|ADQ27996.1| polymerase PA [Influenza A virus (A/ruddy turnstone/DE/1538/2000(H7N9))]	ENSP00000238714|PAPOLG	1	GO:0003723|RNA binding
H7N9|>gi|312126097|gb|ADQ27996.1| polymerase PA [Influenza A virus (A/ruddy turnstone/DE/1538/2000(H7N9))]	ENSP00000240185|TARDBP	1	GO:0003723|RNA binding
H7N9|>gi|312126097|gb|ADQ27996.1| polymerase PA [Influenza A virus (A/ruddy turnstone/DE/1538/2000(H7N9))]	ENSP00000242351|ZC3HAV1	1	GO:0003723|RNA binding
H7N9|>gi|312126097|gb|ADQ27996.1| polymerase PA [Influenza A virus (A/ruddy turnstone/DE/1538/2000(H7N9))]	ENSP00000243498|EXOSC9	1	GO:0003723|RNA binding
H7N9|>gi|312126097|gb|ADQ27996.1| polymerase PA [Influenza A virus (A/ruddy turnstone/DE/1538/2000(H7N9))]	ENSP00000243563|SNRPA	1	GO:0003723|RNA binding
H7N9|>gi|312126097|gb|ADQ27996.1| polymerase PA [Influenza A virus (A/ruddy turnstone/DE/1538/2000(H7N9))]	ENSP00000244020|SRSF6	1	GO:0003723|RNA binding
H7N9|>gi|312126097|gb|ADQ27996.1| polymerase PA [Influenza A virus (A/ruddy turnstone/DE/1538/2000(H7N9))]	ENSP00000244669|APOBEC2	1	GO:0003723|RNA binding
H7N9|>gi|312126097|gb|ADQ27996.1| polymerase PA [Influenza A virus (A/ruddy turnstone/DE/1538/2000(H7N9))]	ENSP00000244769|ATXN1	1	GO:0003723|RNA binding
H7N9|>gi|312126097|gb|ADQ27996.1| polymerase PA [Influenza A virus (A/ruddy turnstone/DE/1538/2000(H7N9))]	ENSP00000245539|MRPS7	1	GO:0003723|RNA binding
H7N9|>gi|312126097|gb|ADQ27996.1| polymerase PA [Influenza A virus (A/ruddy turnstone/DE/1538/2000(H7N9))]	ENSP00000245551|MIF4GD	1	GO:0003723|RNA binding
H7N9|>gi|312126097|gb|ADQ27996.1| polymerase PA [Influenza A virus (A/ruddy turnstone/DE/1538/2000(H7N9))]	ENSP00000245838|THOC2	1	GO:0003723|RNA binding
H7N9|>gi|312126097|gb|ADQ27996.1| polymerase PA [Influenza A virus (A/ruddy turnstone/DE/1538/2000(H7N9))]	ENSP00000246194|RALY	1	GO:0003723|RNA binding
H7N9|>gi|312126097|gb|ADQ27996.1| polymerase PA [Influenza A virus (A/ruddy turnstone/DE/1538/2000(H7N9))]	ENSP00000246314|EIF2C3	1	GO:0003723|RNA binding
H7N9|>gi|312126097|gb|ADQ27996.1| polymerase PA [Influenza A virus (A/ruddy turnstone/DE/1538/2000(H7N9))]	ENSP00000247001|SUGP1	1	GO:0003723|RNA binding
H7N9|>gi|312126097|gb|ADQ27996.1| polymerase PA [Influenza A virus (A/ruddy turnstone/DE/1538/2000(H7N9))]	ENSP00000247003|DDX49	1	GO:0003723|RNA binding
H7N9|>gi|312126097|gb|ADQ27996.1| polymerase PA [Influenza A virus (A/ruddy turnstone/DE/1538/2000(H7N9))]	ENSP00000250113|FXR2	1	GO:0003723|RNA binding
H7N9|>gi|312126097|gb|ADQ27996.1| polymerase PA [Influenza A virus (A/ruddy turnstone/DE/1538/2000(H7N9))]	ENSP00000250156|MRM1	1	GO:0003723|RNA binding
H7N9|>gi|312126097|gb|ADQ27996.1| polymerase PA [Influenza A virus (A/ruddy turnstone/DE/1538/2000(H7N9))]	ENSP00000250241|ILF3	1	GO:0003723|RNA binding
H7N9|>gi|312126097|gb|ADQ27996.1| polymerase PA [Influenza A virus (A/ruddy turnstone/DE/1538/2000(H7N9))]	ENSP00000250784|RPS4Y1	1	GO:0003723|RNA binding
H7N9|>gi|312126097|gb|ADQ27996.1| polymerase PA [Influenza A virus (A/ruddy turnstone/DE/1538/2000(H7N9))]	ENSP00000250831|RBMY1J	1	GO:0003723|RNA binding
H7N9|>gi|312126097|gb|ADQ27996.1| polymerase PA [Influenza A virus (A/ruddy turnstone/DE/1538/2000(H7N9))]	ENSP00000250863|DAZL	1	GO:0003723|RNA binding
H7N9|>gi|312126097|gb|ADQ27996.1| polymerase PA [Influenza A virus (A/ruddy turnstone/DE/1538/2000(H7N9))]	ENSP00000251038|ZC3H14	1	GO:0003723|RNA binding
H7N9|>gi|312126097|gb|ADQ27996.1| polymerase PA [Influenza A virus (A/ruddy turnstone/DE/1538/2000(H7N9))]	ENSP00000251071|CAPRIN2	1	GO:0003723|RNA binding
H7N9|>gi|312126097|gb|ADQ27996.1| polymerase PA [Influenza A virus (A/ruddy turnstone/DE/1538/2000(H7N9))]	ENSP00000251453|RPS16	1	GO:0003723|RNA binding
H7N9|>gi|312126097|gb|ADQ27996.1| polymerase PA [Influenza A virus (A/ruddy turnstone/DE/1538/2000(H7N9))]	ENSP00000251607|TRNT1	1	GO:0003723|RNA binding
H7N9|>gi|312126097|gb|ADQ27996.1| polymerase PA [Influenza A virus (A/ruddy turnstone/DE/1538/2000(H7N9))]	ENSP00000251758|DDX11	1	GO:0003723|RNA binding
H7N9|>gi|312126097|gb|ADQ27996.1| polymerase PA [Influenza A virus (A/ruddy turnstone/DE/1538/2000(H7N9))]	ENSP00000252115|POLDIP3	1	GO:0003723|RNA binding
H7N9|>gi|312126097|gb|ADQ27996.1| polymerase PA [Influenza A virus (A/ruddy turnstone/DE/1538/2000(H7N9))]	ENSP00000252116|POLDIP3	1	GO:0003723|RNA binding
H7N9|>gi|312126097|gb|ADQ27996.1| polymerase PA [Influenza A virus (A/ruddy turnstone/DE/1538/2000(H7N9))]	ENSP00000252136|TRMT2A	1	GO:0003723|RNA binding
H7N9|>gi|312126097|gb|ADQ27996.1| polymerase PA [Influenza A virus (A/ruddy turnstone/DE/1538/2000(H7N9))]	ENSP00000252455|PRKCSH	1	GO:0003723|RNA binding
H7N9|>gi|312126097|gb|ADQ27996.1| polymerase PA [Influenza A virus (A/ruddy turnstone/DE/1538/2000(H7N9))]	ENSP00000252542|SAFB2	1	GO:0003723|RNA binding
H7N9|>gi|312126097|gb|ADQ27996.1| polymerase PA [Influenza A virus (A/ruddy turnstone/DE/1538/2000(H7N9))]	ENSP00000252816|LSM4	1	GO:0003723|RNA binding
H7N9|>gi|312126097|gb|ADQ27996.1| polymerase PA [Influenza A virus (A/ruddy turnstone/DE/1538/2000(H7N9))]	ENSP00000253329|PPIL4	1	GO:0003723|RNA binding
H7N9|>gi|312126097|gb|ADQ27996.1| polymerase PA [Influenza A virus (A/ruddy turnstone/DE/1538/2000(H7N9))]	ENSP00000253363|RBM39	1	GO:0003723|RNA binding
H7N9|>gi|312126097|gb|ADQ27996.1| polymerase PA [Influenza A virus (A/ruddy turnstone/DE/1538/2000(H7N9))]	ENSP00000253952|THOC6	1	GO:0003723|RNA binding
H7N9|>gi|312126097|gb|ADQ27996.1| polymerase PA [Influenza A virus (A/ruddy turnstone/DE/1538/2000(H7N9))]	ENSP00000254108|FUS	1	GO:0003723|RNA binding
H7N9|>gi|312126097|gb|ADQ27996.1| polymerase PA [Influenza A virus (A/ruddy turnstone/DE/1538/2000(H7N9))]	ENSP00000254193|SNRPA1	1	GO:0003723|RNA binding
H7N9|>gi|312126097|gb|ADQ27996.1| polymerase PA [Influenza A virus (A/ruddy turnstone/DE/1538/2000(H7N9))]	ENSP00000254231|LIN28A	1	GO:0003723|RNA binding
H7N9|>gi|312126097|gb|ADQ27996.1| polymerase PA [Influenza A virus (A/ruddy turnstone/DE/1538/2000(H7N9))]	ENSP00000254436|TRIM21	1	GO:0003723|RNA binding
H7N9|>gi|312126097|gb|ADQ27996.1| polymerase PA [Influenza A virus (A/ruddy turnstone/DE/1538/2000(H7N9))]	ENSP00000254799|GRSF1	1	GO:0003723|RNA binding
H7N9|>gi|312126097|gb|ADQ27996.1| polymerase PA [Influenza A virus (A/ruddy turnstone/DE/1538/2000(H7N9))]	ENSP00000254821|ZRANB2	1	GO:0003723|RNA binding
H7N9|>gi|312126097|gb|ADQ27996.1| polymerase PA [Influenza A virus (A/ruddy turnstone/DE/1538/2000(H7N9))]	ENSP00000254928|ERAL1	1	GO:0003723|RNA binding
H7N9|>gi|312126097|gb|ADQ27996.1| polymerase PA [Influenza A virus (A/ruddy turnstone/DE/1538/2000(H7N9))]	ENSP00000254940|NIP7	1	GO:0003723|RNA binding
H7N9|>gi|312126097|gb|ADQ27996.1| polymerase PA [Influenza A virus (A/ruddy turnstone/DE/1538/2000(H7N9))]	ENSP00000254941|NIP7	1	GO:0003723|RNA binding
H7N9|>gi|312126097|gb|ADQ27996.1| polymerase PA [Influenza A virus (A/ruddy turnstone/DE/1538/2000(H7N9))]	ENSP00000255078|IGHMBP2	1	GO:0003723|RNA binding
H7N9|>gi|312126097|gb|ADQ27996.1| polymerase PA [Influenza A virus (A/ruddy turnstone/DE/1538/2000(H7N9))]	ENSP00000255136|PABPC1L	1	GO:0003723|RNA binding
H7N9|>gi|312126097|gb|ADQ27996.1| polymerase PA [Influenza A virus (A/ruddy turnstone/DE/1538/2000(H7N9))]	ENSP00000256383|EIF2S1	1	GO:0003723|RNA binding
H7N9|>gi|312126097|gb|ADQ27996.1| polymerase PA [Influenza A virus (A/ruddy turnstone/DE/1538/2000(H7N9))]	ENSP00000256413|CTIF	1	GO:0003723|RNA binding
H7N9|>gi|312126097|gb|ADQ27996.1| polymerase PA [Influenza A virus (A/ruddy turnstone/DE/1538/2000(H7N9))]	ENSP00000257075|PUM1	1	GO:0003723|RNA binding
H7N9|>gi|312126097|gb|ADQ27996.1| polymerase PA [Influenza A virus (A/ruddy turnstone/DE/1538/2000(H7N9))]	ENSP00000257552|MSI1	1	GO:0003723|RNA binding
H7N9|>gi|312126097|gb|ADQ27996.1| polymerase PA [Influenza A virus (A/ruddy turnstone/DE/1538/2000(H7N9))]	ENSP00000257570|OASL	1	GO:0003723|RNA binding
H7N9|>gi|312126097|gb|ADQ27996.1| polymerase PA [Influenza A virus (A/ruddy turnstone/DE/1538/2000(H7N9))]	ENSP00000257765|KHDC1	1	GO:0003723|RNA binding
H7N9|>gi|312126097|gb|ADQ27996.1| polymerase PA [Influenza A virus (A/ruddy turnstone/DE/1538/2000(H7N9))]	ENSP00000258169|MPHOSPH6	1	GO:0003723|RNA binding
H7N9|>gi|312126097|gb|ADQ27996.1| polymerase PA [Influenza A virus (A/ruddy turnstone/DE/1538/2000(H7N9))]	ENSP00000258383|MRPL44	1	GO:0003723|RNA binding
H7N9|>gi|312126097|gb|ADQ27996.1| polymerase PA [Influenza A virus (A/ruddy turnstone/DE/1538/2000(H7N9))]	ENSP00000258416|EIF4E2	1	GO:0003723|RNA binding
H7N9|>gi|312126097|gb|ADQ27996.1| polymerase PA [Influenza A virus (A/ruddy turnstone/DE/1538/2000(H7N9))]	ENSP00000258729|IGF2BP3	1	GO:0003723|RNA binding
H7N9|>gi|312126097|gb|ADQ27996.1| polymerase PA [Influenza A virus (A/ruddy turnstone/DE/1538/2000(H7N9))]	ENSP00000258772|DDX56	1	GO:0003723|RNA binding
H7N9|>gi|312126097|gb|ADQ27996.1| polymerase PA [Influenza A virus (A/ruddy turnstone/DE/1538/2000(H7N9))]	ENSP00000258886|IREB2	1	GO:0003723|RNA binding
H7N9|>gi|312126097|gb|ADQ27996.1| polymerase PA [Influenza A virus (A/ruddy turnstone/DE/1538/2000(H7N9))]	ENSP00000258962|SRSF1	1	GO:0003723|RNA binding
H7N9|>gi|312126097|gb|ADQ27996.1| polymerase PA [Influenza A virus (A/ruddy turnstone/DE/1538/2000(H7N9))]	ENSP00000259997|CPEB2	1	GO:0003723|RNA binding
H7N9|>gi|312126097|gb|ADQ27996.1| polymerase PA [Influenza A virus (A/ruddy turnstone/DE/1538/2000(H7N9))]	ENSP00000260184|DDX60L	1	GO:0003723|RNA binding
H7N9|>gi|312126097|gb|ADQ27996.1| polymerase PA [Influenza A virus (A/ruddy turnstone/DE/1538/2000(H7N9))]	ENSP00000260318|ALKBH8	1	GO:0003723|RNA binding
H7N9|>gi|312126097|gb|ADQ27996.1| polymerase PA [Influenza A virus (A/ruddy turnstone/DE/1538/2000(H7N9))]	ENSP00000260604|PNPT1	1	GO:0003723|RNA binding
H7N9|>gi|312126097|gb|ADQ27996.1| polymerase PA [Influenza A virus (A/ruddy turnstone/DE/1538/2000(H7N9))]	ENSP00000260619|THUMPD2	1	GO:0003723|RNA binding
H7N9|>gi|312126097|gb|ADQ27996.1| polymerase PA [Influenza A virus (A/ruddy turnstone/DE/1538/2000(H7N9))]	ENSP00000260665|LRPPRC	1	GO:0003723|RNA binding
H7N9|>gi|312126097|gb|ADQ27996.1| polymerase PA [Influenza A virus (A/ruddy turnstone/DE/1538/2000(H7N9))]	ENSP00000260947|BARD1	1	GO:0003723|RNA binding
H7N9|>gi|312126097|gb|ADQ27996.1| polymerase PA [Influenza A virus (A/ruddy turnstone/DE/1538/2000(H7N9))]	ENSP00000260956|SSB	1	GO:0003723|RNA binding
H7N9|>gi|312126097|gb|ADQ27996.1| polymerase PA [Influenza A virus (A/ruddy turnstone/DE/1538/2000(H7N9))]	ENSP00000261377|AC004381.6	1	GO:0003723|RNA binding
H7N9|>gi|312126097|gb|ADQ27996.1| polymerase PA [Influenza A virus (A/ruddy turnstone/DE/1538/2000(H7N9))]	ENSP00000261443|CSDE1	1	GO:0003723|RNA binding
H7N9|>gi|312126097|gb|ADQ27996.1| polymerase PA [Influenza A virus (A/ruddy turnstone/DE/1538/2000(H7N9))]	ENSP00000261479|PSMA6	1	GO:0003723|RNA binding
H7N9|>gi|312126097|gb|ADQ27996.1| polymerase PA [Influenza A virus (A/ruddy turnstone/DE/1538/2000(H7N9))]	ENSP00000261592|NOL4	1	GO:0003723|RNA binding
H7N9|>gi|312126097|gb|ADQ27996.1| polymerase PA [Influenza A virus (A/ruddy turnstone/DE/1538/2000(H7N9))]	ENSP00000261600|THOC1	1	GO:0003723|RNA binding
H7N9|>gi|312126097|gb|ADQ27996.1| polymerase PA [Influenza A virus (A/ruddy turnstone/DE/1538/2000(H7N9))]	ENSP00000261674|SFSWAP	1	GO:0003723|RNA binding
H7N9|>gi|312126097|gb|ADQ27996.1| polymerase PA [Influenza A virus (A/ruddy turnstone/DE/1538/2000(H7N9))]	ENSP00000261723|CPEB1	1	GO:0003723|RNA binding
H7N9|>gi|312126097|gb|ADQ27996.1| polymerase PA [Influenza A virus (A/ruddy turnstone/DE/1538/2000(H7N9))]	ENSP00000261741|RBM19	1	GO:0003723|RNA binding
H7N9|>gi|312126097|gb|ADQ27996.1| polymerase PA [Influenza A virus (A/ruddy turnstone/DE/1538/2000(H7N9))]	ENSP00000261951|CNOT6	1	GO:0003723|RNA binding
H7N9|>gi|312126097|gb|ADQ27996.1| polymerase PA [Influenza A virus (A/ruddy turnstone/DE/1538/2000(H7N9))]	ENSP00000262031|RBMS2	1	GO:0003723|RNA binding
H7N9|>gi|312126097|gb|ADQ27996.1| polymerase PA [Influenza A virus (A/ruddy turnstone/DE/1538/2000(H7N9))]	ENSP00000262056|EIF4B	1	GO:0003723|RNA binding
H7N9|>gi|312126097|gb|ADQ27996.1| polymerase PA [Influenza A virus (A/ruddy turnstone/DE/1538/2000(H7N9))]	ENSP00000262173|RNMT	1	GO:0003723|RNA binding
H7N9|>gi|312126097|gb|ADQ27996.1| polymerase PA [Influenza A virus (A/ruddy turnstone/DE/1538/2000(H7N9))]	ENSP00000262238|YY1	1	GO:0003723|RNA binding
H7N9|>gi|312126097|gb|ADQ27996.1| polymerase PA [Influenza A virus (A/ruddy turnstone/DE/1538/2000(H7N9))]	ENSP00000262415|DHX8	1	GO:0003723|RNA binding
H7N9|>gi|312126097|gb|ADQ27996.1| polymerase PA [Influenza A virus (A/ruddy turnstone/DE/1538/2000(H7N9))]	ENSP00000262519|SETD1A	1	GO:0003723|RNA binding
H7N9|>gi|312126097|gb|ADQ27996.1| polymerase PA [Influenza A virus (A/ruddy turnstone/DE/1538/2000(H7N9))]	ENSP00000262584|RPL8	1	GO:0003723|RNA binding
H7N9|>gi|312126097|gb|ADQ27996.1| polymerase PA [Influenza A virus (A/ruddy turnstone/DE/1538/2000(H7N9))]	ENSP00000262633|RBM42	1	GO:0003723|RNA binding
H7N9|>gi|312126097|gb|ADQ27996.1| polymerase PA [Influenza A virus (A/ruddy turnstone/DE/1538/2000(H7N9))]	ENSP00000262715|TEP1	1	GO:0003723|RNA binding
H7N9|>gi|312126097|gb|ADQ27996.1| polymerase PA [Influenza A virus (A/ruddy turnstone/DE/1538/2000(H7N9))]	ENSP00000262794|MOV10L1	1	GO:0003723|RNA binding
H7N9|>gi|312126097|gb|ADQ27996.1| polymerase PA [Influenza A virus (A/ruddy turnstone/DE/1538/2000(H7N9))]	ENSP00000262803|UPF1	1	GO:0003723|RNA binding
H7N9|>gi|312126097|gb|ADQ27996.1| polymerase PA [Influenza A virus (A/ruddy turnstone/DE/1538/2000(H7N9))]	ENSP00000262829|RBFOX2	1	GO:0003723|RNA binding
H7N9|>gi|312126097|gb|ADQ27996.1| polymerase PA [Influenza A virus (A/ruddy turnstone/DE/1538/2000(H7N9))]	ENSP00000263032|NXF5	1	GO:0003723|RNA binding
H7N9|>gi|312126097|gb|ADQ27996.1| polymerase PA [Influenza A virus (A/ruddy turnstone/DE/1538/2000(H7N9))]	ENSP00000263063|MTPAP	1	GO:0003723|RNA binding
H7N9|>gi|312126097|gb|ADQ27996.1| polymerase PA [Influenza A virus (A/ruddy turnstone/DE/1538/2000(H7N9))]	ENSP00000263239|DDX18	1	GO:0003723|RNA binding
H7N9|>gi|312126097|gb|ADQ27996.1| polymerase PA [Influenza A virus (A/ruddy turnstone/DE/1538/2000(H7N9))]	ENSP00000263257|NOVA2	1	GO:0003723|RNA binding
H7N9|>gi|312126097|gb|ADQ27996.1| polymerase PA [Influenza A virus (A/ruddy turnstone/DE/1538/2000(H7N9))]	ENSP00000263576|DDX25	1	GO:0003723|RNA binding
H7N9|>gi|312126097|gb|ADQ27996.1| polymerase PA [Influenza A virus (A/ruddy turnstone/DE/1538/2000(H7N9))]	ENSP00000263657|PNO1	1	GO:0003723|RNA binding
H7N9|>gi|312126097|gb|ADQ27996.1| polymerase PA [Influenza A virus (A/ruddy turnstone/DE/1538/2000(H7N9))]	ENSP00000263736|SRBD1	1	GO:0003723|RNA binding
H7N9|>gi|312126097|gb|ADQ27996.1| polymerase PA [Influenza A virus (A/ruddy turnstone/DE/1538/2000(H7N9))]	ENSP00000264018|DDX6	1	GO:0003723|RNA binding
H7N9|>gi|312126097|gb|ADQ27996.1| polymerase PA [Influenza A virus (A/ruddy turnstone/DE/1538/2000(H7N9))]	ENSP00000264073|ELAVL1	1	GO:0003723|RNA binding
H7N9|>gi|312126097|gb|ADQ27996.1| polymerase PA [Influenza A virus (A/ruddy turnstone/DE/1538/2000(H7N9))]	ENSP00000264211|EIF4G3	1	GO:0003723|RNA binding
H7N9|>gi|312126097|gb|ADQ27996.1| polymerase PA [Influenza A virus (A/ruddy turnstone/DE/1538/2000(H7N9))]	ENSP00000264258|RPL31	1	GO:0003723|RNA binding
H7N9|>gi|312126097|gb|ADQ27996.1| polymerase PA [Influenza A virus (A/ruddy turnstone/DE/1538/2000(H7N9))]	ENSP00000264447|ZNF638	1	GO:0003723|RNA binding
H7N9|>gi|312126097|gb|ADQ27996.1| polymerase PA [Influenza A virus (A/ruddy turnstone/DE/1538/2000(H7N9))]	ENSP00000264584|LARP1B	1	GO:0003723|RNA binding
H7N9|>gi|312126097|gb|ADQ27996.1| polymerase PA [Influenza A virus (A/ruddy turnstone/DE/1538/2000(H7N9))]	ENSP00000264645|CASC3	1	GO:0003723|RNA binding
H7N9|>gi|312126097|gb|ADQ27996.1| polymerase PA [Influenza A virus (A/ruddy turnstone/DE/1538/2000(H7N9))]	ENSP00000264867|PPARGC1A	1	GO:0003723|RNA binding
H7N9|>gi|312126097|gb|ADQ27996.1| polymerase PA [Influenza A virus (A/ruddy turnstone/DE/1538/2000(H7N9))]	ENSP00000264951|XRN1	1	GO:0003723|RNA binding
H7N9|>gi|312126097|gb|ADQ27996.1| polymerase PA [Influenza A virus (A/ruddy turnstone/DE/1538/2000(H7N9))]	ENSP00000264995|MRPL3	1	GO:0003723|RNA binding
H7N9|>gi|312126097|gb|ADQ27996.1| polymerase PA [Influenza A virus (A/ruddy turnstone/DE/1538/2000(H7N9))]	ENSP00000265069|ZFR	1	GO:0003723|RNA binding
H7N9|>gi|312126097|gb|ADQ27996.1| polymerase PA [Influenza A virus (A/ruddy turnstone/DE/1538/2000(H7N9))]	ENSP00000265085|CPEB4	1	GO:0003723|RNA binding
H7N9|>gi|312126097|gb|ADQ27996.1| polymerase PA [Influenza A virus (A/ruddy turnstone/DE/1538/2000(H7N9))]	ENSP00000265097|THOC3	1	GO:0003723|RNA binding
H7N9|>gi|312126097|gb|ADQ27996.1| polymerase PA [Influenza A virus (A/ruddy turnstone/DE/1538/2000(H7N9))]	ENSP00000265271|RBM27	1	GO:0003723|RNA binding
H7N9|>gi|312126097|gb|ADQ27996.1| polymerase PA [Influenza A virus (A/ruddy turnstone/DE/1538/2000(H7N9))]	ENSP00000265351|XPO5	1	GO:0003723|RNA binding
H7N9|>gi|312126097|gb|ADQ27996.1| polymerase PA [Influenza A virus (A/ruddy turnstone/DE/1538/2000(H7N9))]	ENSP00000265385|IMPDH1	1	GO:0003723|RNA binding
H7N9|>gi|312126097|gb|ADQ27996.1| polymerase PA [Influenza A virus (A/ruddy turnstone/DE/1538/2000(H7N9))]	ENSP00000265564|EXOSC7	1	GO:0003723|RNA binding
H7N9|>gi|312126097|gb|ADQ27996.1| polymerase PA [Influenza A virus (A/ruddy turnstone/DE/1538/2000(H7N9))]	ENSP00000265732|RBM48	1	GO:0003723|RNA binding
H7N9|>gi|312126097|gb|ADQ27996.1| polymerase PA [Influenza A virus (A/ruddy turnstone/DE/1538/2000(H7N9))]	ENSP00000265753|EIF4H	1	GO:0003723|RNA binding
H7N9|>gi|312126097|gb|ADQ27996.1| polymerase PA [Influenza A virus (A/ruddy turnstone/DE/1538/2000(H7N9))]	ENSP00000265754|EIF4H	1	GO:0003723|RNA binding
H7N9|>gi|312126097|gb|ADQ27996.1| polymerase PA [Influenza A virus (A/ruddy turnstone/DE/1538/2000(H7N9))]	ENSP00000265866|HNRNPH3	1	GO:0003723|RNA binding
H7N9|>gi|312126097|gb|ADQ27996.1| polymerase PA [Influenza A virus (A/ruddy turnstone/DE/1538/2000(H7N9))]	ENSP00000265997|CPEB3	1	GO:0003723|RNA binding
H7N9|>gi|312126097|gb|ADQ27996.1| polymerase PA [Influenza A virus (A/ruddy turnstone/DE/1538/2000(H7N9))]	ENSP00000266022|RBM6	1	GO:0003723|RNA binding
H7N9|>gi|312126097|gb|ADQ27996.1| polymerase PA [Influenza A virus (A/ruddy turnstone/DE/1538/2000(H7N9))]	ENSP00000266079|PRPF6	1	GO:0003723|RNA binding
H7N9|>gi|312126097|gb|ADQ27996.1| polymerase PA [Influenza A virus (A/ruddy turnstone/DE/1538/2000(H7N9))]	ENSP00000266529|ZCRB1	1	GO:0003723|RNA binding
H7N9|>gi|312126097|gb|ADQ27996.1| polymerase PA [Influenza A virus (A/ruddy turnstone/DE/1538/2000(H7N9))]	ENSP00000266679|CPSF6	1	GO:0003723|RNA binding
H7N9|>gi|312126097|gb|ADQ27996.1| polymerase PA [Influenza A virus (A/ruddy turnstone/DE/1538/2000(H7N9))]	ENSP00000266735|SNRPF	1	GO:0003723|RNA binding
H7N9|>gi|312126097|gb|ADQ27996.1| polymerase PA [Influenza A virus (A/ruddy turnstone/DE/1538/2000(H7N9))]	ENSP00000267197|SETD1B	1	GO:0003723|RNA binding
H7N9|>gi|312126097|gb|ADQ27996.1| polymerase PA [Influenza A virus (A/ruddy turnstone/DE/1538/2000(H7N9))]	ENSP00000267229|RBM26	1	GO:0003723|RNA binding
H7N9|>gi|312126097|gb|ADQ27996.1| polymerase PA [Influenza A virus (A/ruddy turnstone/DE/1538/2000(H7N9))]	ENSP00000267287|MBNL2	1	GO:0003723|RNA binding
H7N9|>gi|312126097|gb|ADQ27996.1| polymerase PA [Influenza A virus (A/ruddy turnstone/DE/1538/2000(H7N9))]	ENSP00000267422|NOVA1	1	GO:0003723|RNA binding
H7N9|>gi|312126097|gb|ADQ27996.1| polymerase PA [Influenza A virus (A/ruddy turnstone/DE/1538/2000(H7N9))]	ENSP00000267425|NOP9	1	GO:0003723|RNA binding
H7N9|>gi|312126097|gb|ADQ27996.1| polymerase PA [Influenza A virus (A/ruddy turnstone/DE/1538/2000(H7N9))]	ENSP00000267836|MYEF2	1	GO:0003723|RNA binding
H7N9|>gi|312126097|gb|ADQ27996.1| polymerase PA [Influenza A virus (A/ruddy turnstone/DE/1538/2000(H7N9))]	ENSP00000267884|SRP14	1	GO:0003723|RNA binding
H7N9|>gi|312126097|gb|ADQ27996.1| polymerase PA [Influenza A virus (A/ruddy turnstone/DE/1538/2000(H7N9))]	ENSP00000268605|NOL3	1	GO:0003723|RNA binding
H7N9|>gi|312126097|gb|ADQ27996.1| polymerase PA [Influenza A virus (A/ruddy turnstone/DE/1538/2000(H7N9))]	ENSP00000268624|ADAD2	1	GO:0003723|RNA binding
H7N9|>gi|312126097|gb|ADQ27996.1| polymerase PA [Influenza A virus (A/ruddy turnstone/DE/1538/2000(H7N9))]	ENSP00000268661|RPL3L	1	GO:0003723|RNA binding
H7N9|>gi|312126097|gb|ADQ27996.1| polymerase PA [Influenza A virus (A/ruddy turnstone/DE/1538/2000(H7N9))]	ENSP00000268854|DDX52	1	GO:0003723|RNA binding
H7N9|>gi|312126097|gb|ADQ27996.1| polymerase PA [Influenza A virus (A/ruddy turnstone/DE/1538/2000(H7N9))]	ENSP00000269185|NOL4	1	GO:0003723|RNA binding
H7N9|>gi|312126097|gb|ADQ27996.1| polymerase PA [Influenza A virus (A/ruddy turnstone/DE/1538/2000(H7N9))]	ENSP00000271628|SF3B4	1	GO:0003723|RNA binding
H7N9|>gi|312126097|gb|ADQ27996.1| polymerase PA [Influenza A virus (A/ruddy turnstone/DE/1538/2000(H7N9))]	ENSP00000271764|EIF2D	1	GO:0003723|RNA binding
H7N9|>gi|312126097|gb|ADQ27996.1| polymerase PA [Influenza A virus (A/ruddy turnstone/DE/1538/2000(H7N9))]	ENSP00000272249|HNRPLL	1	GO:0003723|RNA binding
H7N9|>gi|312126097|gb|ADQ27996.1| polymerase PA [Influenza A virus (A/ruddy turnstone/DE/1538/2000(H7N9))]	ENSP00000272348|SNRPG	1	GO:0003723|RNA binding
H7N9|>gi|312126097|gb|ADQ27996.1| polymerase PA [Influenza A virus (A/ruddy turnstone/DE/1538/2000(H7N9))]	ENSP00000272418|MRPS5	1	GO:0003723|RNA binding
H7N9|>gi|312126097|gb|ADQ27996.1| polymerase PA [Influenza A virus (A/ruddy turnstone/DE/1538/2000(H7N9))]	ENSP00000272444|DUSP11	1	GO:0003723|RNA binding
H7N9|>gi|312126097|gb|ADQ27996.1| polymerase PA [Influenza A virus (A/ruddy turnstone/DE/1538/2000(H7N9))]	ENSP00000272570|ZC3H8	1	GO:0003723|RNA binding
H7N9|>gi|312126097|gb|ADQ27996.1| polymerase PA [Influenza A virus (A/ruddy turnstone/DE/1538/2000(H7N9))]	ENSP00000273009|DIS3L2	1	GO:0003723|RNA binding
H7N9|>gi|312126097|gb|ADQ27996.1| polymerase PA [Influenza A virus (A/ruddy turnstone/DE/1538/2000(H7N9))]	ENSP00000273139|RBMS3	1	GO:0003723|RNA binding
H7N9|>gi|312126097|gb|ADQ27996.1| polymerase PA [Influenza A virus (A/ruddy turnstone/DE/1538/2000(H7N9))]	ENSP00000273283|ITIH1	1	GO:0003723|RNA binding
H7N9|>gi|312126097|gb|ADQ27996.1| polymerase PA [Influenza A virus (A/ruddy turnstone/DE/1538/2000(H7N9))]	ENSP00000274054|NAF1	1	GO:0003723|RNA binding
H7N9|>gi|312126097|gb|ADQ27996.1| polymerase PA [Influenza A virus (A/ruddy turnstone/DE/1538/2000(H7N9))]	ENSP00000274242|RPL37	1	GO:0003723|RNA binding
H7N9|>gi|312126097|gb|ADQ27996.1| polymerase PA [Influenza A virus (A/ruddy turnstone/DE/1538/2000(H7N9))]	ENSP00000274849|ABT1	1	GO:0003723|RNA binding
H7N9|>gi|312126097|gb|ADQ27996.1| polymerase PA [Influenza A virus (A/ruddy turnstone/DE/1538/2000(H7N9))]	ENSP00000275262|QKI	1	GO:0003723|RNA binding
H7N9|>gi|312126097|gb|ADQ27996.1| polymerase PA [Influenza A virus (A/ruddy turnstone/DE/1538/2000(H7N9))]	ENSP00000275820|NOM1	1	GO:0003723|RNA binding
H7N9|>gi|312126097|gb|ADQ27996.1| polymerase PA [Influenza A virus (A/ruddy turnstone/DE/1538/2000(H7N9))]	ENSP00000276079|NONO	1	GO:0003723|RNA binding
H7N9|>gi|312126097|gb|ADQ27996.1| polymerase PA [Influenza A virus (A/ruddy turnstone/DE/1538/2000(H7N9))]	ENSP00000277165|FAM120A	1	GO:0003723|RNA binding
H7N9|>gi|312126097|gb|ADQ27996.1| polymerase PA [Influenza A virus (A/ruddy turnstone/DE/1538/2000(H7N9))]	ENSP00000278070|PPRC1	1	GO:0003723|RNA binding
H7N9|>gi|312126097|gb|ADQ27996.1| polymerase PA [Influenza A virus (A/ruddy turnstone/DE/1538/2000(H7N9))]	ENSP00000278279|TUT1	1	GO:0003723|RNA binding
H7N9|>gi|312126097|gb|ADQ27996.1| polymerase PA [Influenza A virus (A/ruddy turnstone/DE/1538/2000(H7N9))]	ENSP00000278572|RPS3	1	GO:0003723|RNA binding
H7N9|>gi|312126097|gb|ADQ27996.1| polymerase PA [Influenza A virus (A/ruddy turnstone/DE/1538/2000(H7N9))]	ENSP00000279259|FAU	1	GO:0003723|RNA binding
H7N9|>gi|312126097|gb|ADQ27996.1| polymerase PA [Influenza A virus (A/ruddy turnstone/DE/1538/2000(H7N9))]	ENSP00000280154|PDCD4	1	GO:0003723|RNA binding
H7N9|>gi|312126097|gb|ADQ27996.1| polymerase PA [Influenza A virus (A/ruddy turnstone/DE/1538/2000(H7N9))]	ENSP00000280591|TRNT1	1	GO:0003723|RNA binding
H7N9|>gi|312126097|gb|ADQ27996.1| polymerase PA [Influenza A virus (A/ruddy turnstone/DE/1538/2000(H7N9))]	ENSP00000280892|EIF4E	1	GO:0003723|RNA binding
H7N9|>gi|312126097|gb|ADQ27996.1| polymerase PA [Influenza A virus (A/ruddy turnstone/DE/1538/2000(H7N9))]	ENSP00000281156|KHDRBS2	1	GO:0003723|RNA binding
H7N9|>gi|312126097|gb|ADQ27996.1| polymerase PA [Influenza A virus (A/ruddy turnstone/DE/1538/2000(H7N9))]	ENSP00000281589|PABPC3	1	GO:0003723|RNA binding
H7N9|>gi|312126097|gb|ADQ27996.1| polymerase PA [Influenza A virus (A/ruddy turnstone/DE/1538/2000(H7N9))]	ENSP00000281722|RBM46	1	GO:0003723|RNA binding
H7N9|>gi|312126097|gb|ADQ27996.1| polymerase PA [Influenza A virus (A/ruddy turnstone/DE/1538/2000(H7N9))]	ENSP00000281828|FARSB	1	GO:0003723|RNA binding
H7N9|>gi|312126097|gb|ADQ27996.1| polymerase PA [Influenza A virus (A/ruddy turnstone/DE/1538/2000(H7N9))]	ENSP00000282278|BOLL	1	GO:0003723|RNA binding
H7N9|>gi|312126097|gb|ADQ27996.1| polymerase PA [Influenza A virus (A/ruddy turnstone/DE/1538/2000(H7N9))]	ENSP00000282388|ZFP36L2	1	GO:0003723|RNA binding
H7N9|>gi|312126097|gb|ADQ27996.1| polymerase PA [Influenza A virus (A/ruddy turnstone/DE/1538/2000(H7N9))]	ENSP00000282486|MBNL1	1	GO:0003723|RNA binding
H7N9|>gi|312126097|gb|ADQ27996.1| polymerase PA [Influenza A virus (A/ruddy turnstone/DE/1538/2000(H7N9))]	ENSP00000282488|MBNL1	1	GO:0003723|RNA binding
H7N9|>gi|312126097|gb|ADQ27996.1| polymerase PA [Influenza A virus (A/ruddy turnstone/DE/1538/2000(H7N9))]	ENSP00000282641|A1CF	1	GO:0003723|RNA binding
H7N9|>gi|312126097|gb|ADQ27996.1| polymerase PA [Influenza A virus (A/ruddy turnstone/DE/1538/2000(H7N9))]	ENSP00000282924|JAKMIP1	1	GO:0003723|RNA binding
H7N9|>gi|312126097|gb|ADQ27996.1| polymerase PA [Influenza A virus (A/ruddy turnstone/DE/1538/2000(H7N9))]	ENSP00000283179|HNRNPU	1	GO:0003723|RNA binding
H7N9|>gi|312126097|gb|ADQ27996.1| polymerase PA [Influenza A virus (A/ruddy turnstone/DE/1538/2000(H7N9))]	ENSP00000285814|MKI67IP	1	GO:0003723|RNA binding
H7N9|>gi|312126097|gb|ADQ27996.1| polymerase PA [Influenza A virus (A/ruddy turnstone/DE/1538/2000(H7N9))]	ENSP00000286070|RBM45	1	GO:0003723|RNA binding
H7N9|>gi|312126097|gb|ADQ27996.1| polymerase PA [Influenza A virus (A/ruddy turnstone/DE/1538/2000(H7N9))]	ENSP00000286835|SCAF4	1	GO:0003723|RNA binding
H7N9|>gi|312126097|gb|ADQ27996.1| polymerase PA [Influenza A virus (A/ruddy turnstone/DE/1538/2000(H7N9))]	ENSP00000287038|RPL30	1	GO:0003723|RNA binding
H7N9|>gi|312126097|gb|ADQ27996.1| polymerase PA [Influenza A virus (A/ruddy turnstone/DE/1538/2000(H7N9))]	ENSP00000287202|CELF6	1	GO:0003723|RNA binding
H7N9|>gi|312126097|gb|ADQ27996.1| polymerase PA [Influenza A virus (A/ruddy turnstone/DE/1538/2000(H7N9))]	ENSP00000287912|RBM33	1	GO:0003723|RNA binding
H7N9|>gi|312126097|gb|ADQ27996.1| polymerase PA [Influenza A virus (A/ruddy turnstone/DE/1538/2000(H7N9))]	ENSP00000288071|DDX19B	1	GO:0003723|RNA binding
H7N9|>gi|312126097|gb|ADQ27996.1| polymerase PA [Influenza A virus (A/ruddy turnstone/DE/1538/2000(H7N9))]	ENSP00000288666|RPS4Y2	1	GO:0003723|RNA binding
H7N9|>gi|312126097|gb|ADQ27996.1| polymerase PA [Influenza A virus (A/ruddy turnstone/DE/1538/2000(H7N9))]	ENSP00000290239|SON	1	GO:0003723|RNA binding
H7N9|>gi|312126097|gb|ADQ27996.1| polymerase PA [Influenza A virus (A/ruddy turnstone/DE/1538/2000(H7N9))]	ENSP00000290341|IGF2BP1	1	GO:0003723|RNA binding
H7N9|>gi|312126097|gb|ADQ27996.1| polymerase PA [Influenza A virus (A/ruddy turnstone/DE/1538/2000(H7N9))]	ENSP00000290583|CELF3	1	GO:0003723|RNA binding
H7N9|>gi|312126097|gb|ADQ27996.1| polymerase PA [Influenza A virus (A/ruddy turnstone/DE/1538/2000(H7N9))]	ENSP00000291552|U2AF1	1	GO:0003723|RNA binding
H7N9|>gi|312126097|gb|ADQ27996.1| polymerase PA [Influenza A virus (A/ruddy turnstone/DE/1538/2000(H7N9))]	ENSP00000292123|SAFB	1	GO:0003723|RNA binding
H7N9|>gi|312126097|gb|ADQ27996.1| polymerase PA [Influenza A virus (A/ruddy turnstone/DE/1538/2000(H7N9))]	ENSP00000292205|ADAR	1	GO:0003723|RNA binding
H7N9|>gi|312126097|gb|ADQ27996.1| polymerase PA [Influenza A virus (A/ruddy turnstone/DE/1538/2000(H7N9))]	ENSP00000292476|CPSF4	1	GO:0003723|RNA binding
H7N9|>gi|312126097|gb|ADQ27996.1| polymerase PA [Influenza A virus (A/ruddy turnstone/DE/1538/2000(H7N9))]	ENSP00000292672|CELF5	1	GO:0003723|RNA binding
H7N9|>gi|312126097|gb|ADQ27996.1| polymerase PA [Influenza A virus (A/ruddy turnstone/DE/1538/2000(H7N9))]	ENSP00000292879|U2AF1L4	1	GO:0003723|RNA binding
H7N9|>gi|312126097|gb|ADQ27996.1| polymerase PA [Influenza A virus (A/ruddy turnstone/DE/1538/2000(H7N9))]	ENSP00000293273|RDM1	1	GO:0003723|RNA binding
H7N9|>gi|312126097|gb|ADQ27996.1| polymerase PA [Influenza A virus (A/ruddy turnstone/DE/1538/2000(H7N9))]	ENSP00000293842|RPL26	1	GO:0003723|RNA binding
H7N9|>gi|312126097|gb|ADQ27996.1| polymerase PA [Influenza A virus (A/ruddy turnstone/DE/1538/2000(H7N9))]	ENSP00000294172|NXF1	1	GO:0003723|RNA binding
H7N9|>gi|312126097|gb|ADQ27996.1| polymerase PA [Influenza A virus (A/ruddy turnstone/DE/1538/2000(H7N9))]	ENSP00000294189|RPL29	1	GO:0003723|RNA binding
H7N9|>gi|312126097|gb|ADQ27996.1| polymerase PA [Influenza A virus (A/ruddy turnstone/DE/1538/2000(H7N9))]	ENSP00000294428|RAVER2	1	GO:0003723|RNA binding
H7N9|>gi|312126097|gb|ADQ27996.1| polymerase PA [Influenza A virus (A/ruddy turnstone/DE/1538/2000(H7N9))]	ENSP00000294623|FUBP1	1	GO:0003723|RNA binding
H7N9|>gi|312126097|gb|ADQ27996.1| polymerase PA [Influenza A virus (A/ruddy turnstone/DE/1538/2000(H7N9))]	ENSP00000294904|RBMS1	1	GO:0003723|RNA binding
H7N9|>gi|312126097|gb|ADQ27996.1| polymerase PA [Influenza A virus (A/ruddy turnstone/DE/1538/2000(H7N9))]	ENSP00000295612|EIF4E3	1	GO:0003723|RNA binding
H7N9|>gi|312126097|gb|ADQ27996.1| polymerase PA [Influenza A virus (A/ruddy turnstone/DE/1538/2000(H7N9))]	ENSP00000295749|CWC22	1	GO:0003723|RNA binding
H7N9|>gi|312126097|gb|ADQ27996.1| polymerase PA [Influenza A virus (A/ruddy turnstone/DE/1538/2000(H7N9))]	ENSP00000295822|EIF5A2	1	GO:0003723|RNA binding
H7N9|>gi|312126097|gb|ADQ27996.1| polymerase PA [Influenza A virus (A/ruddy turnstone/DE/1538/2000(H7N9))]	ENSP00000295899|THOC7	1	GO:0003723|RNA binding
H7N9|>gi|312126097|gb|ADQ27996.1| polymerase PA [Influenza A virus (A/ruddy turnstone/DE/1538/2000(H7N9))]	ENSP00000295959|RPP14	1	GO:0003723|RNA binding
H7N9|>gi|312126097|gb|ADQ27996.1| polymerase PA [Influenza A virus (A/ruddy turnstone/DE/1538/2000(H7N9))]	ENSP00000295971|RBM47	1	GO:0003723|RNA binding
H7N9|>gi|312126097|gb|ADQ27996.1| polymerase PA [Influenza A virus (A/ruddy turnstone/DE/1538/2000(H7N9))]	ENSP00000296015|TTC14	1	GO:0003723|RNA binding
H7N9|>gi|312126097|gb|ADQ27996.1| polymerase PA [Influenza A virus (A/ruddy turnstone/DE/1538/2000(H7N9))]	ENSP00000296513|ADAD1	1	GO:0003723|RNA binding
H7N9|>gi|312126097|gb|ADQ27996.1| polymerase PA [Influenza A virus (A/ruddy turnstone/DE/1538/2000(H7N9))]	ENSP00000296581|LSM6	1	GO:0003723|RNA binding
H7N9|>gi|312126097|gb|ADQ27996.1| polymerase PA [Influenza A virus (A/ruddy turnstone/DE/1538/2000(H7N9))]	ENSP00000296820|TERT	1	GO:0003723|RNA binding
H7N9|>gi|312126097|gb|ADQ27996.1| polymerase PA [Influenza A virus (A/ruddy turnstone/DE/1538/2000(H7N9))]	ENSP00000296930|NPM1	1	GO:0003723|RNA binding
H7N9|>gi|312126097|gb|ADQ27996.1| polymerase PA [Influenza A virus (A/ruddy turnstone/DE/1538/2000(H7N9))]	ENSP00000297071|TRA2A	1	GO:0003723|RNA binding
H7N9|>gi|312126097|gb|ADQ27996.1| polymerase PA [Influenza A virus (A/ruddy turnstone/DE/1538/2000(H7N9))]	ENSP00000297183|ANKHD1	1	GO:0003723|RNA binding
H7N9|>gi|312126097|gb|ADQ27996.1| polymerase PA [Influenza A virus (A/ruddy turnstone/DE/1538/2000(H7N9))]	ENSP00000297540|PHAX	1	GO:0003723|RNA binding
H7N9|>gi|312126097|gb|ADQ27996.1| polymerase PA [Influenza A virus (A/ruddy turnstone/DE/1538/2000(H7N9))]	ENSP00000297990|NOL6	1	GO:0003723|RNA binding
H7N9|>gi|312126097|gb|ADQ27996.1| polymerase PA [Influenza A virus (A/ruddy turnstone/DE/1538/2000(H7N9))]	ENSP00000298317|RPUSD4	1	GO:0003723|RNA binding
H7N9|>gi|312126097|gb|ADQ27996.1| polymerase PA [Influenza A virus (A/ruddy turnstone/DE/1538/2000(H7N9))]	ENSP00000298717|METTL3	1	GO:0003723|RNA binding
H7N9|>gi|312126097|gb|ADQ27996.1| polymerase PA [Influenza A virus (A/ruddy turnstone/DE/1538/2000(H7N9))]	ENSP00000298746|TRUB1	1	GO:0003723|RNA binding
H7N9|>gi|312126097|gb|ADQ27996.1| polymerase PA [Influenza A virus (A/ruddy turnstone/DE/1538/2000(H7N9))]	ENSP00000298875|CPSF2	1	GO:0003723|RNA binding
H7N9|>gi|312126097|gb|ADQ27996.1| polymerase PA [Influenza A virus (A/ruddy turnstone/DE/1538/2000(H7N9))]	ENSP00000298892|CAPRIN2	1	GO:0003723|RNA binding
H7N9|>gi|312126097|gb|ADQ27996.1| polymerase PA [Influenza A virus (A/ruddy turnstone/DE/1538/2000(H7N9))]	ENSP00000299213|LARP6	1	GO:0003723|RNA binding
H7N9|>gi|312126097|gb|ADQ27996.1| polymerase PA [Influenza A virus (A/ruddy turnstone/DE/1538/2000(H7N9))]	ENSP00000299472|NOVA1	1	GO:0003723|RNA binding
H7N9|>gi|312126097|gb|ADQ27996.1| polymerase PA [Influenza A virus (A/ruddy turnstone/DE/1538/2000(H7N9))]	ENSP00000299767|HSP90B1	1	GO:0003723|RNA binding
H7N9|>gi|312126097|gb|ADQ27996.1| polymerase PA [Influenza A virus (A/ruddy turnstone/DE/1538/2000(H7N9))]	ENSP00000300146|PATL1	1	GO:0003723|RNA binding
H7N9|>gi|312126097|gb|ADQ27996.1| polymerase PA [Influenza A virus (A/ruddy turnstone/DE/1538/2000(H7N9))]	ENSP00000300278|SON	1	GO:0003723|RNA binding
H7N9|>gi|312126097|gb|ADQ27996.1| polymerase PA [Influenza A virus (A/ruddy turnstone/DE/1538/2000(H7N9))]	ENSP00000300291|NUDT21	1	GO:0003723|RNA binding
H7N9|>gi|312126097|gb|ADQ27996.1| polymerase PA [Influenza A virus (A/ruddy turnstone/DE/1538/2000(H7N9))]	ENSP00000300413|SNRPD1	1	GO:0003723|RNA binding
H7N9|>gi|312126097|gb|ADQ27996.1| polymerase PA [Influenza A virus (A/ruddy turnstone/DE/1538/2000(H7N9))]	ENSP00000301624|TNRC6C	1	GO:0003723|RNA binding
H7N9|>gi|312126097|gb|ADQ27996.1| polymerase PA [Influenza A virus (A/ruddy turnstone/DE/1538/2000(H7N9))]	ENSP00000301730|RNPS1	1	GO:0003723|RNA binding
H7N9|>gi|312126097|gb|ADQ27996.1| polymerase PA [Influenza A virus (A/ruddy turnstone/DE/1538/2000(H7N9))]	ENSP00000301740|SRRM2	1	GO:0003723|RNA binding
H7N9|>gi|312126097|gb|ADQ27996.1| polymerase PA [Influenza A virus (A/ruddy turnstone/DE/1538/2000(H7N9))]	ENSP00000301788|POLR2G	1	GO:0003723|RNA binding
H7N9|>gi|312126097|gb|ADQ27996.1| polymerase PA [Influenza A virus (A/ruddy turnstone/DE/1538/2000(H7N9))]	ENSP00000302160|LSM3	1	GO:0003723|RNA binding
H7N9|>gi|312126097|gb|ADQ27996.1| polymerase PA [Influenza A virus (A/ruddy turnstone/DE/1538/2000(H7N9))]	ENSP00000302485|CSDC2	1	GO:0003723|RNA binding
H7N9|>gi|312126097|gb|ADQ27996.1| polymerase PA [Influenza A virus (A/ruddy turnstone/DE/1538/2000(H7N9))]	ENSP00000302768|PAIP1	1	GO:0003723|RNA binding
H7N9|>gi|312126097|gb|ADQ27996.1| polymerase PA [Influenza A virus (A/ruddy turnstone/DE/1538/2000(H7N9))]	ENSP00000302886|PA2G4	1	GO:0003723|RNA binding
H7N9|>gi|312126097|gb|ADQ27996.1| polymerase PA [Influenza A virus (A/ruddy turnstone/DE/1538/2000(H7N9))]	ENSP00000302896|RPS9	1	GO:0003723|RNA binding
H7N9|>gi|312126097|gb|ADQ27996.1| polymerase PA [Influenza A virus (A/ruddy turnstone/DE/1538/2000(H7N9))]	ENSP00000302916|JMJD6	1	GO:0003723|RNA binding
H7N9|>gi|312126097|gb|ADQ27996.1| polymerase PA [Influenza A virus (A/ruddy turnstone/DE/1538/2000(H7N9))]	ENSP00000302993|FIP1L1	1	GO:0003723|RNA binding
H7N9|>gi|312126097|gb|ADQ27996.1| polymerase PA [Influenza A virus (A/ruddy turnstone/DE/1538/2000(H7N9))]	ENSP00000304072|DDX54	1	GO:0003723|RNA binding
H7N9|>gi|312126097|gb|ADQ27996.1| polymerase PA [Influenza A virus (A/ruddy turnstone/DE/1538/2000(H7N9))]	ENSP00000304139|RBMXL2	1	GO:0003723|RNA binding
H7N9|>gi|312126097|gb|ADQ27996.1| polymerase PA [Influenza A virus (A/ruddy turnstone/DE/1538/2000(H7N9))]	ENSP00000304350|PRPF8	1	GO:0003723|RNA binding
H7N9|>gi|312126097|gb|ADQ27996.1| polymerase PA [Influenza A virus (A/ruddy turnstone/DE/1538/2000(H7N9))]	ENSP00000304405|HNRNPR	1	GO:0003723|RNA binding
H7N9|>gi|312126097|gb|ADQ27996.1| polymerase PA [Influenza A virus (A/ruddy turnstone/DE/1538/2000(H7N9))]	ENSP00000305230|SRP9	1	GO:0003723|RNA binding
H7N9|>gi|312126097|gb|ADQ27996.1| polymerase PA [Influenza A virus (A/ruddy turnstone/DE/1538/2000(H7N9))]	ENSP00000305556|PCBP1	1	GO:0003723|RNA binding
H7N9|>gi|312126097|gb|ADQ27996.1| polymerase PA [Influenza A virus (A/ruddy turnstone/DE/1538/2000(H7N9))]	ENSP00000305857|SMN1	1	GO:0003723|RNA binding
H7N9|>gi|312126097|gb|ADQ27996.1| polymerase PA [Influenza A virus (A/ruddy turnstone/DE/1538/2000(H7N9))]	ENSP00000305860|HNRNPD	1	GO:0003723|RNA binding
H7N9|>gi|312126097|gb|ADQ27996.1| polymerase PA [Influenza A virus (A/ruddy turnstone/DE/1538/2000(H7N9))]	ENSP00000306080|RNMTL1	1	GO:0003723|RNA binding
H7N9|>gi|312126097|gb|ADQ27996.1| polymerase PA [Influenza A virus (A/ruddy turnstone/DE/1538/2000(H7N9))]	ENSP00000306117|DDX19A	1	GO:0003723|RNA binding
H7N9|>gi|312126097|gb|ADQ27996.1| polymerase PA [Influenza A virus (A/ruddy turnstone/DE/1538/2000(H7N9))]	ENSP00000306223|SNRPN	1	GO:0003723|RNA binding
H7N9|>gi|312126097|gb|ADQ27996.1| polymerase PA [Influenza A virus (A/ruddy turnstone/DE/1538/2000(H7N9))]	ENSP00000306565|ISG20	1	GO:0003723|RNA binding
H7N9|>gi|312126097|gb|ADQ27996.1| polymerase PA [Influenza A virus (A/ruddy turnstone/DE/1538/2000(H7N9))]	ENSP00000306759|TNRC6B	1	GO:0003723|RNA binding
H7N9|>gi|312126097|gb|ADQ27996.1| polymerase PA [Influenza A virus (A/ruddy turnstone/DE/1538/2000(H7N9))]	ENSP00000307025|ZC3H14	1	GO:0003723|RNA binding
H7N9|>gi|312126097|gb|ADQ27996.1| polymerase PA [Influenza A virus (A/ruddy turnstone/DE/1538/2000(H7N9))]	ENSP00000307155|RBMY1F	1	GO:0003723|RNA binding
H7N9|>gi|312126097|gb|ADQ27996.1| polymerase PA [Influenza A virus (A/ruddy turnstone/DE/1538/2000(H7N9))]	ENSP00000307181|FAM103A1	1	GO:0003723|RNA binding
H7N9|>gi|312126097|gb|ADQ27996.1| polymerase PA [Influenza A virus (A/ruddy turnstone/DE/1538/2000(H7N9))]	ENSP00000307307|EXOSC10	1	GO:0003723|RNA binding
H7N9|>gi|312126097|gb|ADQ27996.1| polymerase PA [Influenza A virus (A/ruddy turnstone/DE/1538/2000(H7N9))]	ENSP00000307633|FXR1	1	GO:0003723|RNA binding
H7N9|>gi|312126097|gb|ADQ27996.1| polymerase PA [Influenza A virus (A/ruddy turnstone/DE/1538/2000(H7N9))]	ENSP00000307774|ZNF239	1	GO:0003723|RNA binding
H7N9|>gi|312126097|gb|ADQ27996.1| polymerase PA [Influenza A virus (A/ruddy turnstone/DE/1538/2000(H7N9))]	ENSP00000307863|U2AF2	1	GO:0003723|RNA binding
H7N9|>gi|312126097|gb|ADQ27996.1| polymerase PA [Influenza A virus (A/ruddy turnstone/DE/1538/2000(H7N9))]	ENSP00000307889|RPL13	1	GO:0003723|RNA binding
H7N9|>gi|312126097|gb|ADQ27996.1| polymerase PA [Influenza A virus (A/ruddy turnstone/DE/1538/2000(H7N9))]	ENSP00000307968|NABP1	1	GO:0003723|RNA binding
H7N9|>gi|312126097|gb|ADQ27996.1| polymerase PA [Influenza A virus (A/ruddy turnstone/DE/1538/2000(H7N9))]	ENSP00000308000|TUT1	1	GO:0003723|RNA binding
H7N9|>gi|312126097|gb|ADQ27996.1| polymerase PA [Influenza A virus (A/ruddy turnstone/DE/1538/2000(H7N9))]	ENSP00000308012|PABPC5	1	GO:0003723|RNA binding
H7N9|>gi|312126097|gb|ADQ27996.1| polymerase PA [Influenza A virus (A/ruddy turnstone/DE/1538/2000(H7N9))]	ENSP00000308386|CELF1	1	GO:0003723|RNA binding
H7N9|>gi|312126097|gb|ADQ27996.1| polymerase PA [Influenza A virus (A/ruddy turnstone/DE/1538/2000(H7N9))]	ENSP00000309117|RBFOX1	1	GO:0003723|RNA binding
H7N9|>gi|312126097|gb|ADQ27996.1| polymerase PA [Influenza A virus (A/ruddy turnstone/DE/1538/2000(H7N9))]	ENSP00000309166|RBM4	1	GO:0003723|RNA binding
H7N9|>gi|312126097|gb|ADQ27996.1| polymerase PA [Influenza A virus (A/ruddy turnstone/DE/1538/2000(H7N9))]	ENSP00000309175|EIF1AD	1	GO:0003723|RNA binding
H7N9|>gi|312126097|gb|ADQ27996.1| polymerase PA [Influenza A virus (A/ruddy turnstone/DE/1538/2000(H7N9))]	ENSP00000309334|RPL15	1	GO:0003723|RNA binding
H7N9|>gi|312126097|gb|ADQ27996.1| polymerase PA [Influenza A virus (A/ruddy turnstone/DE/1538/2000(H7N9))]	ENSP00000309477|ACO1	1	GO:0003723|RNA binding
H7N9|>gi|312126097|gb|ADQ27996.1| polymerase PA [Influenza A virus (A/ruddy turnstone/DE/1538/2000(H7N9))]	ENSP00000309479|RAD51AP1	1	GO:0003723|RNA binding
H7N9|>gi|312126097|gb|ADQ27996.1| polymerase PA [Influenza A virus (A/ruddy turnstone/DE/1538/2000(H7N9))]	ENSP00000309558|TAF15	1	GO:0003723|RNA binding
H7N9|>gi|312126097|gb|ADQ27996.1| polymerase PA [Influenza A virus (A/ruddy turnstone/DE/1538/2000(H7N9))]	ENSP00000309572|TERT	1	GO:0003723|RNA binding
H7N9|>gi|312126097|gb|ADQ27996.1| polymerase PA [Influenza A virus (A/ruddy turnstone/DE/1538/2000(H7N9))]	ENSP00000309749|APOBEC3F	1	GO:0003723|RNA binding
H7N9|>gi|312126097|gb|ADQ27996.1| polymerase PA [Influenza A virus (A/ruddy turnstone/DE/1538/2000(H7N9))]	ENSP00000309830|RPL38	1	GO:0003723|RNA binding
H7N9|>gi|312126097|gb|ADQ27996.1| polymerase PA [Influenza A virus (A/ruddy turnstone/DE/1538/2000(H7N9))]	ENSP00000309965|DDX11	1	GO:0003723|RNA binding
H7N9|>gi|312126097|gb|ADQ27996.1| polymerase PA [Influenza A virus (A/ruddy turnstone/DE/1538/2000(H7N9))]	ENSP00000310015|ADAT1	1	GO:0003723|RNA binding
H7N9|>gi|312126097|gb|ADQ27996.1| polymerase PA [Influenza A virus (A/ruddy turnstone/DE/1538/2000(H7N9))]	ENSP00000310471|RBM4B	1	GO:0003723|RNA binding
H7N9|>gi|312126097|gb|ADQ27996.1| polymerase PA [Influenza A virus (A/ruddy turnstone/DE/1538/2000(H7N9))]	ENSP00000310539|DDX31	1	GO:0003723|RNA binding
H7N9|>gi|312126097|gb|ADQ27996.1| polymerase PA [Influenza A virus (A/ruddy turnstone/DE/1538/2000(H7N9))]	ENSP00000310596|LSM1	1	GO:0003723|RNA binding
H7N9|>gi|312126097|gb|ADQ27996.1| polymerase PA [Influenza A virus (A/ruddy turnstone/DE/1538/2000(H7N9))]	ENSP00000310771|GRB7	1	GO:0003723|RNA binding
H7N9|>gi|312126097|gb|ADQ27996.1| polymerase PA [Influenza A virus (A/ruddy turnstone/DE/1538/2000(H7N9))]	ENSP00000311028|RPS14	1	GO:0003723|RNA binding
H7N9|>gi|312126097|gb|ADQ27996.1| polymerase PA [Influenza A virus (A/ruddy turnstone/DE/1538/2000(H7N9))]	ENSP00000311221|ZMAT3	1	GO:0003723|RNA binding
H7N9|>gi|312126097|gb|ADQ27996.1| polymerase PA [Influenza A virus (A/ruddy turnstone/DE/1538/2000(H7N9))]	ENSP00000311430|RPL4	1	GO:0003723|RNA binding
H7N9|>gi|312126097|gb|ADQ27996.1| polymerase PA [Influenza A virus (A/ruddy turnstone/DE/1538/2000(H7N9))]	ENSP00000311677|PPP1R8	1	GO:0003723|RNA binding
H7N9|>gi|312126097|gb|ADQ27996.1| polymerase PA [Influenza A virus (A/ruddy turnstone/DE/1538/2000(H7N9))]	ENSP00000311747|RBM14	1	GO:0003723|RNA binding
H7N9|>gi|312126097|gb|ADQ27996.1| polymerase PA [Influenza A virus (A/ruddy turnstone/DE/1538/2000(H7N9))]	ENSP00000311752|GRB7	1	GO:0003723|RNA binding
H7N9|>gi|312126097|gb|ADQ27996.1| polymerase PA [Influenza A virus (A/ruddy turnstone/DE/1538/2000(H7N9))]	ENSP00000312042|HDLBP	1	GO:0003723|RNA binding
H7N9|>gi|312126097|gb|ADQ27996.1| polymerase PA [Influenza A virus (A/ruddy turnstone/DE/1538/2000(H7N9))]	ENSP00000312059|AGFG1	1	GO:0003723|RNA binding
H7N9|>gi|312126097|gb|ADQ27996.1| polymerase PA [Influenza A virus (A/ruddy turnstone/DE/1538/2000(H7N9))]	ENSP00000312066|SRP68	1	GO:0003723|RNA binding
H7N9|>gi|312126097|gb|ADQ27996.1| polymerase PA [Influenza A virus (A/ruddy turnstone/DE/1538/2000(H7N9))]	ENSP00000312236|BRCA1	1	GO:0003723|RNA binding
H7N9|>gi|312126097|gb|ADQ27996.1| polymerase PA [Influenza A virus (A/ruddy turnstone/DE/1538/2000(H7N9))]	ENSP00000312649|PPARGC1B	1	GO:0003723|RNA binding
H7N9|>gi|312126097|gb|ADQ27996.1| polymerase PA [Influenza A virus (A/ruddy turnstone/DE/1538/2000(H7N9))]	ENSP00000312769|PPIE	1	GO:0003723|RNA binding
H7N9|>gi|312126097|gb|ADQ27996.1| polymerase PA [Influenza A virus (A/ruddy turnstone/DE/1538/2000(H7N9))]	ENSP00000313007|PABPC1	1	GO:0003723|RNA binding
H7N9|>gi|312126097|gb|ADQ27996.1| polymerase PA [Influenza A virus (A/ruddy turnstone/DE/1538/2000(H7N9))]	ENSP00000313199|HNRNPD	1	GO:0003723|RNA binding
H7N9|>gi|312126097|gb|ADQ27996.1| polymerase PA [Influenza A virus (A/ruddy turnstone/DE/1538/2000(H7N9))]	ENSP00000313272|NOP2	1	GO:0003723|RNA binding
H7N9|>gi|312126097|gb|ADQ27996.1| polymerase PA [Influenza A virus (A/ruddy turnstone/DE/1538/2000(H7N9))]	ENSP00000313327|HNRNPD	1	GO:0003723|RNA binding
H7N9|>gi|312126097|gb|ADQ27996.1| polymerase PA [Influenza A virus (A/ruddy turnstone/DE/1538/2000(H7N9))]	ENSP00000313350|RNASEH1	1	GO:0003723|RNA binding
H7N9|>gi|312126097|gb|ADQ27996.1| polymerase PA [Influenza A virus (A/ruddy turnstone/DE/1538/2000(H7N9))]	ENSP00000313362|MAZ	1	GO:0003723|RNA binding
H7N9|>gi|312126097|gb|ADQ27996.1| polymerase PA [Influenza A virus (A/ruddy turnstone/DE/1538/2000(H7N9))]	ENSP00000313829|KHDRBS1	1	GO:0003723|RNA binding
H7N9|>gi|312126097|gb|ADQ27996.1| polymerase PA [Influenza A virus (A/ruddy turnstone/DE/1538/2000(H7N9))]	ENSP00000313890|RBM15B	1	GO:0003723|RNA binding
H7N9|>gi|312126097|gb|ADQ27996.1| polymerase PA [Influenza A virus (A/ruddy turnstone/DE/1538/2000(H7N9))]	ENSP00000313978|NOL6	1	GO:0003723|RNA binding
H7N9|>gi|312126097|gb|ADQ27996.1| polymerase PA [Influenza A virus (A/ruddy turnstone/DE/1538/2000(H7N9))]	ENSP00000314075|AKAP1	1	GO:0003723|RNA binding
H7N9|>gi|312126097|gb|ADQ27996.1| polymerase PA [Influenza A virus (A/ruddy turnstone/DE/1538/2000(H7N9))]	ENSP00000314311|LARP7	1	GO:0003723|RNA binding
H7N9|>gi|312126097|gb|ADQ27996.1| polymerase PA [Influenza A virus (A/ruddy turnstone/DE/1538/2000(H7N9))]	ENSP00000314348|DDX10	1	GO:0003723|RNA binding
H7N9|>gi|312126097|gb|ADQ27996.1| polymerase PA [Influenza A virus (A/ruddy turnstone/DE/1538/2000(H7N9))]	ENSP00000314792|BOLL	1	GO:0003723|RNA binding
H7N9|>gi|312126097|gb|ADQ27996.1| polymerase PA [Influenza A virus (A/ruddy turnstone/DE/1538/2000(H7N9))]	ENSP00000314949|POLR2A	1	GO:0003968|RNA-directed RNA polymerase activity
H7N9|>gi|312126097|gb|ADQ27996.1| polymerase PA [Influenza A virus (A/ruddy turnstone/DE/1538/2000(H7N9))]	ENSP00000315017|MRPL1	1	GO:0003723|RNA binding
H7N9|>gi|312126097|gb|ADQ27996.1| polymerase PA [Influenza A virus (A/ruddy turnstone/DE/1538/2000(H7N9))]	ENSP00000315205|ILF3	1	GO:0003723|RNA binding
H7N9|>gi|312126097|gb|ADQ27996.1| polymerase PA [Influenza A virus (A/ruddy turnstone/DE/1538/2000(H7N9))]	ENSP00000315328|CELF2	1	GO:0003723|RNA binding
H7N9|>gi|312126097|gb|ADQ27996.1| polymerase PA [Influenza A virus (A/ruddy turnstone/DE/1538/2000(H7N9))]	ENSP00000315569|DIS3L2	1	GO:0003723|RNA binding
H7N9|>gi|312126097|gb|ADQ27996.1| polymerase PA [Influenza A virus (A/ruddy turnstone/DE/1538/2000(H7N9))]	ENSP00000315791|CSTF3	1	GO:0003723|RNA binding
H7N9|>gi|312126097|gb|ADQ27996.1| polymerase PA [Influenza A virus (A/ruddy turnstone/DE/1538/2000(H7N9))]	ENSP00000315859|RNPS1	1	GO:0003723|RNA binding
H7N9|>gi|312126097|gb|ADQ27996.1| polymerase PA [Influenza A virus (A/ruddy turnstone/DE/1538/2000(H7N9))]	ENSP00000316042|HNRNPA0	1	GO:0003723|RNA binding
H7N9|>gi|312126097|gb|ADQ27996.1| polymerase PA [Influenza A virus (A/ruddy turnstone/DE/1538/2000(H7N9))]	ENSP00000316879|EIF4G1	1	GO:0003723|RNA binding
H7N9|>gi|312126097|gb|ADQ27996.1| polymerase PA [Influenza A virus (A/ruddy turnstone/DE/1538/2000(H7N9))]	ENSP00000316950|MYEF2	1	GO:0003723|RNA binding
H7N9|>gi|312126097|gb|ADQ27996.1| polymerase PA [Influenza A virus (A/ruddy turnstone/DE/1538/2000(H7N9))]	ENSP00000317600|EIF4G1	1	GO:0003723|RNA binding
H7N9|>gi|312126097|gb|ADQ27996.1| polymerase PA [Influenza A virus (A/ruddy turnstone/DE/1538/2000(H7N9))]	ENSP00000317691|RPP25	1	GO:0003723|RNA binding
H7N9|>gi|312126097|gb|ADQ27996.1| polymerase PA [Influenza A virus (A/ruddy turnstone/DE/1538/2000(H7N9))]	ENSP00000317788|HNRNPK	1	GO:0003723|RNA binding
H7N9|>gi|312126097|gb|ADQ27996.1| polymerase PA [Influenza A virus (A/ruddy turnstone/DE/1538/2000(H7N9))]	ENSP00000318115|TIMM50	1	GO:0003723|RNA binding
H7N9|>gi|312126097|gb|ADQ27996.1| polymerase PA [Influenza A virus (A/ruddy turnstone/DE/1538/2000(H7N9))]	ENSP00000318177|FUBP3	1	GO:0003723|RNA binding
H7N9|>gi|312126097|gb|ADQ27996.1| polymerase PA [Influenza A virus (A/ruddy turnstone/DE/1538/2000(H7N9))]	ENSP00000318195|NCL	1	GO:0003723|RNA binding
H7N9|>gi|312126097|gb|ADQ27996.1| polymerase PA [Influenza A virus (A/ruddy turnstone/DE/1538/2000(H7N9))]	ENSP00000318415|RBMXL1	1	GO:0003723|RNA binding
H7N9|>gi|312126097|gb|ADQ27996.1| polymerase PA [Influenza A virus (A/ruddy turnstone/DE/1538/2000(H7N9))]	ENSP00000318646|RPS15A	1	GO:0003723|RNA binding
H7N9|>gi|312126097|gb|ADQ27996.1| polymerase PA [Influenza A virus (A/ruddy turnstone/DE/1538/2000(H7N9))]	ENSP00000319104|SUPT6H	1	GO:0003723|RNA binding
H7N9|>gi|312126097|gb|ADQ27996.1| polymerase PA [Influenza A virus (A/ruddy turnstone/DE/1538/2000(H7N9))]	ENSP00000319240|MAGOHB	1	GO:0003723|RNA binding
H7N9|>gi|312126097|gb|ADQ27996.1| polymerase PA [Influenza A virus (A/ruddy turnstone/DE/1538/2000(H7N9))]	ENSP00000319429|MBNL1	1	GO:0003723|RNA binding
H7N9|>gi|312126097|gb|ADQ27996.1| polymerase PA [Influenza A virus (A/ruddy turnstone/DE/1538/2000(H7N9))]	ENSP00000319690|HNRNPC	1	GO:0003723|RNA binding
H7N9|>gi|312126097|gb|ADQ27996.1| polymerase PA [Influenza A virus (A/ruddy turnstone/DE/1538/2000(H7N9))]	ENSP00000320108|RBM47	1	GO:0003723|RNA binding
H7N9|>gi|312126097|gb|ADQ27996.1| polymerase PA [Influenza A virus (A/ruddy turnstone/DE/1538/2000(H7N9))]	ENSP00000320204|IGF2BP2	1	GO:0003723|RNA binding
H7N9|>gi|312126097|gb|ADQ27996.1| polymerase PA [Influenza A virus (A/ruddy turnstone/DE/1538/2000(H7N9))]	ENSP00000320461|ASCC1	1	GO:0003723|RNA binding
H7N9|>gi|312126097|gb|ADQ27996.1| polymerase PA [Influenza A virus (A/ruddy turnstone/DE/1538/2000(H7N9))]	ENSP00000320503|EDC3	1	GO:0003723|RNA binding
H7N9|>gi|312126097|gb|ADQ27996.1| polymerase PA [Influenza A virus (A/ruddy turnstone/DE/1538/2000(H7N9))]	ENSP00000320810|ASCC1	1	GO:0003723|RNA binding
H7N9|>gi|312126097|gb|ADQ27996.1| polymerase PA [Influenza A virus (A/ruddy turnstone/DE/1538/2000(H7N9))]	ENSP00000321179|RBM44	1	GO:0003723|RNA binding
H7N9|>gi|312126097|gb|ADQ27996.1| polymerase PA [Influenza A virus (A/ruddy turnstone/DE/1538/2000(H7N9))]	ENSP00000321449|RRP7A	1	GO:0003723|RNA binding
H7N9|>gi|312126097|gb|ADQ27996.1| polymerase PA [Influenza A virus (A/ruddy turnstone/DE/1538/2000(H7N9))]	ENSP00000321583|DIS3L	1	GO:0003723|RNA binding
H7N9|>gi|312126097|gb|ADQ27996.1| polymerase PA [Influenza A virus (A/ruddy turnstone/DE/1538/2000(H7N9))]	ENSP00000321584|IMPDH2	1	GO:0003723|RNA binding
H7N9|>gi|312126097|gb|ADQ27996.1| polymerase PA [Influenza A virus (A/ruddy turnstone/DE/1538/2000(H7N9))]	ENSP00000321625|MIF4GD	1	GO:0003723|RNA binding
H7N9|>gi|312126097|gb|ADQ27996.1| polymerase PA [Influenza A virus (A/ruddy turnstone/DE/1538/2000(H7N9))]	ENSP00000321711|DIS3L	1	GO:0003723|RNA binding
H7N9|>gi|312126097|gb|ADQ27996.1| polymerase PA [Influenza A virus (A/ruddy turnstone/DE/1538/2000(H7N9))]	ENSP00000321997|LARP1B	1	GO:0003723|RNA binding
H7N9|>gi|312126097|gb|ADQ27996.1| polymerase PA [Influenza A virus (A/ruddy turnstone/DE/1538/2000(H7N9))]	ENSP00000322016|PUF60	1	GO:0003723|RNA binding
H7N9|>gi|312126097|gb|ADQ27996.1| polymerase PA [Influenza A virus (A/ruddy turnstone/DE/1538/2000(H7N9))]	ENSP00000322036|PUF60	1	GO:0003723|RNA binding
H7N9|>gi|312126097|gb|ADQ27996.1| polymerase PA [Influenza A virus (A/ruddy turnstone/DE/1538/2000(H7N9))]	ENSP00000322234|SYNJ1	1	GO:0003723|RNA binding
H7N9|>gi|312126097|gb|ADQ27996.1| polymerase PA [Influenza A virus (A/ruddy turnstone/DE/1538/2000(H7N9))]	ENSP00000322341|PCBP4	1	GO:0003723|RNA binding
H7N9|>gi|312126097|gb|ADQ27996.1| polymerase PA [Influenza A virus (A/ruddy turnstone/DE/1538/2000(H7N9))]	ENSP00000322376|U2SURP	1	GO:0003723|RNA binding
H7N9|>gi|312126097|gb|ADQ27996.1| polymerase PA [Influenza A virus (A/ruddy turnstone/DE/1538/2000(H7N9))]	ENSP00000322419|RPLP2	1	GO:0003723|RNA binding
H7N9|>gi|312126097|gb|ADQ27996.1| polymerase PA [Influenza A virus (A/ruddy turnstone/DE/1538/2000(H7N9))]	ENSP00000323046|EXOSC3	1	GO:0003723|RNA binding
H7N9|>gi|312126097|gb|ADQ27996.1| polymerase PA [Influenza A virus (A/ruddy turnstone/DE/1538/2000(H7N9))]	ENSP00000323288|RPUSD2	1	GO:0003723|RNA binding
H7N9|>gi|312126097|gb|ADQ27996.1| polymerase PA [Influenza A virus (A/ruddy turnstone/DE/1538/2000(H7N9))]	ENSP00000323714|EIF4E1B	1	GO:0003723|RNA binding
H7N9|>gi|312126097|gb|ADQ27996.1| polymerase PA [Influenza A virus (A/ruddy turnstone/DE/1538/2000(H7N9))]	ENSP00000323737|EIF4G1	1	GO:0003723|RNA binding
H7N9|>gi|312126097|gb|ADQ27996.1| polymerase PA [Influenza A virus (A/ruddy turnstone/DE/1538/2000(H7N9))]	ENSP00000323750|RAD51AP1	1	GO:0003723|RNA binding
H7N9|>gi|312126097|gb|ADQ27996.1| polymerase PA [Influenza A virus (A/ruddy turnstone/DE/1538/2000(H7N9))]	ENSP00000323858|DDX54	1	GO:0003723|RNA binding
H7N9|>gi|312126097|gb|ADQ27996.1| polymerase PA [Influenza A virus (A/ruddy turnstone/DE/1538/2000(H7N9))]	ENSP00000324122|PRPF31	1	GO:0003723|RNA binding
H7N9|>gi|312126097|gb|ADQ27996.1| polymerase PA [Influenza A virus (A/ruddy turnstone/DE/1538/2000(H7N9))]	ENSP00000324203|WRAP53	1	GO:0003723|RNA binding
H7N9|>gi|312126097|gb|ADQ27996.1| polymerase PA [Influenza A virus (A/ruddy turnstone/DE/1538/2000(H7N9))]	ENSP00000324328|TRDMT1	1	GO:0003723|RNA binding
H7N9|>gi|312126097|gb|ADQ27996.1| polymerase PA [Influenza A virus (A/ruddy turnstone/DE/1538/2000(H7N9))]	ENSP00000324726|PUS1	1	GO:0003723|RNA binding
H7N9|>gi|312126097|gb|ADQ27996.1| polymerase PA [Influenza A virus (A/ruddy turnstone/DE/1538/2000(H7N9))]	ENSP00000324827|AKAP17A	1	GO:0003723|RNA binding
H7N9|>gi|312126097|gb|ADQ27996.1| polymerase PA [Influenza A virus (A/ruddy turnstone/DE/1538/2000(H7N9))]	ENSP00000325153|ADAD2	1	GO:0003723|RNA binding
H7N9|>gi|312126097|gb|ADQ27996.1| polymerase PA [Influenza A virus (A/ruddy turnstone/DE/1538/2000(H7N9))]	ENSP00000325376|HNRNPM	1	GO:0003723|RNA binding
H7N9|>gi|312126097|gb|ADQ27996.1| polymerase PA [Influenza A virus (A/ruddy turnstone/DE/1538/2000(H7N9))]	ENSP00000325732|HNRNPM	1	GO:0003723|RNA binding
H7N9|>gi|312126097|gb|ADQ27996.1| polymerase PA [Influenza A virus (A/ruddy turnstone/DE/1538/2000(H7N9))]	ENSP00000325905|SRSF7	1	GO:0003723|RNA binding
H7N9|>gi|312126097|gb|ADQ27996.1| polymerase PA [Influenza A virus (A/ruddy turnstone/DE/1538/2000(H7N9))]	ENSP00000326003|PUS10	1	GO:0003723|RNA binding
H7N9|>gi|312126097|gb|ADQ27996.1| polymerase PA [Influenza A virus (A/ruddy turnstone/DE/1538/2000(H7N9))]	ENSP00000326128|LARP4B	1	GO:0003723|RNA binding
H7N9|>gi|312126097|gb|ADQ27996.1| polymerase PA [Influenza A virus (A/ruddy turnstone/DE/1538/2000(H7N9))]	ENSP00000326261|SRRM1	1	GO:0003723|RNA binding
H7N9|>gi|312126097|gb|ADQ27996.1| polymerase PA [Influenza A virus (A/ruddy turnstone/DE/1538/2000(H7N9))]	ENSP00000326531|THOC6	1	GO:0003723|RNA binding
H7N9|>gi|312126097|gb|ADQ27996.1| polymerase PA [Influenza A virus (A/ruddy turnstone/DE/1538/2000(H7N9))]	ENSP00000326731|CNOT4	1	GO:0003723|RNA binding
H7N9|>gi|312126097|gb|ADQ27996.1| polymerase PA [Influenza A virus (A/ruddy turnstone/DE/1538/2000(H7N9))]	ENSP00000326746|PUM2	1	GO:0003723|RNA binding
H7N9|>gi|312126097|gb|ADQ27996.1| polymerase PA [Influenza A virus (A/ruddy turnstone/DE/1538/2000(H7N9))]	ENSP00000326777|MTHFSD	1	GO:0003723|RNA binding
H7N9|>gi|312126097|gb|ADQ27996.1| polymerase PA [Influenza A virus (A/ruddy turnstone/DE/1538/2000(H7N9))]	ENSP00000326900|TNRC6A	1	GO:0003723|RNA binding
H7N9|>gi|312126097|gb|ADQ27996.1| polymerase PA [Influenza A virus (A/ruddy turnstone/DE/1538/2000(H7N9))]	ENSP00000326981|IMP3	1	GO:0003723|RNA binding
H7N9|>gi|312126097|gb|ADQ27996.1| polymerase PA [Influenza A virus (A/ruddy turnstone/DE/1538/2000(H7N9))]	ENSP00000327080|RBM26	1	GO:0003723|RNA binding
H7N9|>gi|312126097|gb|ADQ27996.1| polymerase PA [Influenza A virus (A/ruddy turnstone/DE/1538/2000(H7N9))]	ENSP00000327176|ZC3H14	1	GO:0003723|RNA binding
H7N9|>gi|312126097|gb|ADQ27996.1| polymerase PA [Influenza A virus (A/ruddy turnstone/DE/1538/2000(H7N9))]	ENSP00000327456|EWSR1	1	GO:0003723|RNA binding
H7N9|>gi|312126097|gb|ADQ27996.1| polymerase PA [Influenza A virus (A/ruddy turnstone/DE/1538/2000(H7N9))]	ENSP00000327459|APOBEC3B	1	GO:0003723|RNA binding
H7N9|>gi|312126097|gb|ADQ27996.1| polymerase PA [Influenza A virus (A/ruddy turnstone/DE/1538/2000(H7N9))]	ENSP00000328690|DDX24	1	GO:0003723|RNA binding
H7N9|>gi|312126097|gb|ADQ27996.1| polymerase PA [Influenza A virus (A/ruddy turnstone/DE/1538/2000(H7N9))]	ENSP00000328848|RBM10	1	GO:0003723|RNA binding
H7N9|>gi|312126097|gb|ADQ27996.1| polymerase PA [Influenza A virus (A/ruddy turnstone/DE/1538/2000(H7N9))]	ENSP00000329592|UPF3A	1	GO:0003723|RNA binding
H7N9|>gi|312126097|gb|ADQ27996.1| polymerase PA [Influenza A virus (A/ruddy turnstone/DE/1538/2000(H7N9))]	ENSP00000329659|RBM10	1	GO:0003723|RNA binding
H7N9|>gi|312126097|gb|ADQ27996.1| polymerase PA [Influenza A virus (A/ruddy turnstone/DE/1538/2000(H7N9))]	ENSP00000329918|MEX3B	1	GO:0003723|RNA binding
H7N9|>gi|312126097|gb|ADQ27996.1| polymerase PA [Influenza A virus (A/ruddy turnstone/DE/1538/2000(H7N9))]	ENSP00000330031|PIWIL3	1	GO:0003723|RNA binding
H7N9|>gi|312126097|gb|ADQ27996.1| polymerase PA [Influenza A virus (A/ruddy turnstone/DE/1538/2000(H7N9))]	ENSP00000330349|DDX41	1	GO:0003723|RNA binding
H7N9|>gi|312126097|gb|ADQ27996.1| polymerase PA [Influenza A virus (A/ruddy turnstone/DE/1538/2000(H7N9))]	ENSP00000330460|DDX59	1	GO:0003723|RNA binding
H7N9|>gi|312126097|gb|ADQ27996.1| polymerase PA [Influenza A virus (A/ruddy turnstone/DE/1538/2000(H7N9))]	ENSP00000331211|RBM43	1	GO:0003723|RNA binding
H7N9|>gi|312126097|gb|ADQ27996.1| polymerase PA [Influenza A virus (A/ruddy turnstone/DE/1538/2000(H7N9))]	ENSP00000331327|WT1	1	GO:0003723|RNA binding
H7N9|>gi|312126097|gb|ADQ27996.1| polymerase PA [Influenza A virus (A/ruddy turnstone/DE/1538/2000(H7N9))]	ENSP00000331471|NXF2	1	GO:0003723|RNA binding
H7N9|>gi|312126097|gb|ADQ27996.1| polymerase PA [Influenza A virus (A/ruddy turnstone/DE/1538/2000(H7N9))]	ENSP00000331535|NXF5	1	GO:0003723|RNA binding
H7N9|>gi|312126097|gb|ADQ27996.1| polymerase PA [Influenza A virus (A/ruddy turnstone/DE/1538/2000(H7N9))]	ENSP00000331817|ALYREF	1	GO:0003723|RNA binding
H7N9|>gi|312126097|gb|ADQ27996.1| polymerase PA [Influenza A virus (A/ruddy turnstone/DE/1538/2000(H7N9))]	ENSP00000331907|DHX34	1	GO:0003723|RNA binding
H7N9|>gi|312126097|gb|ADQ27996.1| polymerase PA [Influenza A virus (A/ruddy turnstone/DE/1538/2000(H7N9))]	ENSP00000332265|ANKRD17	1	GO:0003723|RNA binding
H7N9|>gi|312126097|gb|ADQ27996.1| polymerase PA [Influenza A virus (A/ruddy turnstone/DE/1538/2000(H7N9))]	ENSP00000332340|DDX28	1	GO:0003723|RNA binding
H7N9|>gi|312126097|gb|ADQ27996.1| polymerase PA [Influenza A virus (A/ruddy turnstone/DE/1538/2000(H7N9))]	ENSP00000332373|SUGP2	1	GO:0003723|RNA binding
H7N9|>gi|312126097|gb|ADQ27996.1| polymerase PA [Influenza A virus (A/ruddy turnstone/DE/1538/2000(H7N9))]	ENSP00000332444|CSTF2T	1	GO:0003723|RNA binding
H7N9|>gi|312126097|gb|ADQ27996.1| polymerase PA [Influenza A virus (A/ruddy turnstone/DE/1538/2000(H7N9))]	ENSP00000333001|RBM8A	1	GO:0003723|RNA binding
H7N9|>gi|312126097|gb|ADQ27996.1| polymerase PA [Influenza A virus (A/ruddy turnstone/DE/1538/2000(H7N9))]	ENSP00000333837|MRPL12	1	GO:0003723|RNA binding
H7N9|>gi|312126097|gb|ADQ27996.1| polymerase PA [Influenza A virus (A/ruddy turnstone/DE/1538/2000(H7N9))]	ENSP00000334032|SUGP1	1	GO:0003723|RNA binding
H7N9|>gi|312126097|gb|ADQ27996.1| polymerase PA [Influenza A virus (A/ruddy turnstone/DE/1538/2000(H7N9))]	ENSP00000334058|CPEB2	1	GO:0003723|RNA binding
H7N9|>gi|312126097|gb|ADQ27996.1| polymerase PA [Influenza A virus (A/ruddy turnstone/DE/1538/2000(H7N9))]	ENSP00000334346|TERT	1	GO:0003723|RNA binding
H7N9|>gi|312126097|gb|ADQ27996.1| polymerase PA [Influenza A virus (A/ruddy turnstone/DE/1538/2000(H7N9))]	ENSP00000334414|SF1	1	GO:0003723|RNA binding
H7N9|>gi|312126097|gb|ADQ27996.1| polymerase PA [Influenza A virus (A/ruddy turnstone/DE/1538/2000(H7N9))]	ENSP00000334499|PTBP3	1	GO:0003723|RNA binding
H7N9|>gi|312126097|gb|ADQ27996.1| polymerase PA [Influenza A virus (A/ruddy turnstone/DE/1538/2000(H7N9))]	ENSP00000334533|CPEB4	1	GO:0003723|RNA binding
H7N9|>gi|312126097|gb|ADQ27996.1| polymerase PA [Influenza A virus (A/ruddy turnstone/DE/1538/2000(H7N9))]	ENSP00000334918|FAM120A	1	GO:0003723|RNA binding
H7N9|>gi|312126097|gb|ADQ27996.1| polymerase PA [Influenza A virus (A/ruddy turnstone/DE/1538/2000(H7N9))]	ENSP00000336543|SNURF	1	GO:0003723|RNA binding
H7N9|>gi|312126097|gb|ADQ27996.1| polymerase PA [Influenza A virus (A/ruddy turnstone/DE/1538/2000(H7N9))]	ENSP00000336702|EIF5A	1	GO:0003723|RNA binding
H7N9|>gi|312126097|gb|ADQ27996.1| polymerase PA [Influenza A virus (A/ruddy turnstone/DE/1538/2000(H7N9))]	ENSP00000336721|LARP1	1	GO:0003723|RNA binding
H7N9|>gi|312126097|gb|ADQ27996.1| polymerase PA [Influenza A virus (A/ruddy turnstone/DE/1538/2000(H7N9))]	ENSP00000336725|DDX3Y	1	GO:0003723|RNA binding
H7N9|>gi|312126097|gb|ADQ27996.1| polymerase PA [Influenza A virus (A/ruddy turnstone/DE/1538/2000(H7N9))]	ENSP00000336752|FIP1L1	1	GO:0003723|RNA binding
H7N9|>gi|312126097|gb|ADQ27996.1| polymerase PA [Influenza A virus (A/ruddy turnstone/DE/1538/2000(H7N9))]	ENSP00000336776|EIF5A	1	GO:0003723|RNA binding
H7N9|>gi|312126097|gb|ADQ27996.1| polymerase PA [Influenza A virus (A/ruddy turnstone/DE/1538/2000(H7N9))]	ENSP00000337132|DAZAP1	1	GO:0003723|RNA binding
H7N9|>gi|312126097|gb|ADQ27996.1| polymerase PA [Influenza A virus (A/ruddy turnstone/DE/1538/2000(H7N9))]	ENSP00000337632|SARNP	1	GO:0003723|RNA binding
H7N9|>gi|312126097|gb|ADQ27996.1| polymerase PA [Influenza A virus (A/ruddy turnstone/DE/1538/2000(H7N9))]	ENSP00000337736|AKAP1	1	GO:0003723|RNA binding
H7N9|>gi|312126097|gb|ADQ27996.1| polymerase PA [Influenza A virus (A/ruddy turnstone/DE/1538/2000(H7N9))]	ENSP00000337926|SUGP2	1	GO:0003723|RNA binding
H7N9|>gi|312126097|gb|ADQ27996.1| polymerase PA [Influenza A virus (A/ruddy turnstone/DE/1538/2000(H7N9))]	ENSP00000338002|ZC3H14	1	GO:0003723|RNA binding
H7N9|>gi|312126097|gb|ADQ27996.1| polymerase PA [Influenza A virus (A/ruddy turnstone/DE/1538/2000(H7N9))]	ENSP00000338020|EIF4G1	1	GO:0003723|RNA binding
H7N9|>gi|312126097|gb|ADQ27996.1| polymerase PA [Influenza A virus (A/ruddy turnstone/DE/1538/2000(H7N9))]	ENSP00000338095|HNRNPC	1	GO:0003723|RNA binding
H7N9|>gi|312126097|gb|ADQ27996.1| polymerase PA [Influenza A virus (A/ruddy turnstone/DE/1538/2000(H7N9))]	ENSP00000338143|SUPT6H	1	GO:0003723|RNA binding
H7N9|>gi|312126097|gb|ADQ27996.1| polymerase PA [Influenza A virus (A/ruddy turnstone/DE/1538/2000(H7N9))]	ENSP00000338173|PUM2	1	GO:0003723|RNA binding
H7N9|>gi|312126097|gb|ADQ27996.1| polymerase PA [Influenza A virus (A/ruddy turnstone/DE/1538/2000(H7N9))]	ENSP00000338371|TNRC6B	1	GO:0003723|RNA binding
H7N9|>gi|312126097|gb|ADQ27996.1| polymerase PA [Influenza A virus (A/ruddy turnstone/DE/1538/2000(H7N9))]	ENSP00000338477|HNRNPF	1	GO:0003723|RNA binding
H7N9|>gi|312126097|gb|ADQ27996.1| polymerase PA [Influenza A virus (A/ruddy turnstone/DE/1538/2000(H7N9))]	ENSP00000338897|APOBEC3B	1	GO:0003723|RNA binding
H7N9|>gi|312126097|gb|ADQ27996.1| polymerase PA [Influenza A virus (A/ruddy turnstone/DE/1538/2000(H7N9))]	ENSP00000339027|RPLP0	1	GO:0003723|RNA binding
H7N9|>gi|312126097|gb|ADQ27996.1| polymerase PA [Influenza A virus (A/ruddy turnstone/DE/1538/2000(H7N9))]	ENSP00000339090|RBMX2	1	GO:0003723|RNA binding
H7N9|>gi|312126097|gb|ADQ27996.1| polymerase PA [Influenza A virus (A/ruddy turnstone/DE/1538/2000(H7N9))]	ENSP00000339095|RPS7	1	GO:0003723|RNA binding
H7N9|>gi|312126097|gb|ADQ27996.1| polymerase PA [Influenza A virus (A/ruddy turnstone/DE/1538/2000(H7N9))]	ENSP00000339220|RBM23	1	GO:0003723|RNA binding
H7N9|>gi|312126097|gb|ADQ27996.1| polymerase PA [Influenza A virus (A/ruddy turnstone/DE/1538/2000(H7N9))]	ENSP00000339404|ASCC1	1	GO:0003723|RNA binding
H7N9|>gi|312126097|gb|ADQ27996.1| polymerase PA [Influenza A virus (A/ruddy turnstone/DE/1538/2000(H7N9))]	ENSP00000339532|THUMPD3	1	GO:0003723|RNA binding
H7N9|>gi|312126097|gb|ADQ27996.1| polymerase PA [Influenza A virus (A/ruddy turnstone/DE/1538/2000(H7N9))]	ENSP00000339622|PAIP1	1	GO:0003723|RNA binding
H7N9|>gi|312126097|gb|ADQ27996.1| polymerase PA [Influenza A virus (A/ruddy turnstone/DE/1538/2000(H7N9))]	ENSP00000339795|RPL7	1	GO:0003723|RNA binding
H7N9|>gi|312126097|gb|ADQ27996.1| polymerase PA [Influenza A virus (A/ruddy turnstone/DE/1538/2000(H7N9))]	ENSP00000339845|DROSHA	1	GO:0003723|RNA binding
H7N9|>gi|312126097|gb|ADQ27996.1| polymerase PA [Influenza A virus (A/ruddy turnstone/DE/1538/2000(H7N9))]	ENSP00000340281|EIF4G2	1	GO:0003723|RNA binding
H7N9|>gi|312126097|gb|ADQ27996.1| polymerase PA [Influenza A virus (A/ruddy turnstone/DE/1538/2000(H7N9))]	ENSP00000340329|CAPRIN1	1	GO:0003723|RNA binding
H7N9|>gi|312126097|gb|ADQ27996.1| polymerase PA [Influenza A virus (A/ruddy turnstone/DE/1538/2000(H7N9))]	ENSP00000340584|ZBP1	1	GO:0003723|RNA binding
H7N9|>gi|312126097|gb|ADQ27996.1| polymerase PA [Influenza A virus (A/ruddy turnstone/DE/1538/2000(H7N9))]	ENSP00000340705|PTBP3	1	GO:0003723|RNA binding
H7N9|>gi|312126097|gb|ADQ27996.1| polymerase PA [Influenza A virus (A/ruddy turnstone/DE/1538/2000(H7N9))]	ENSP00000340774|SNRNP35	1	GO:0003723|RNA binding
H7N9|>gi|312126097|gb|ADQ27996.1| polymerase PA [Influenza A virus (A/ruddy turnstone/DE/1538/2000(H7N9))]	ENSP00000340857|HNRNPUL1	1	GO:0003723|RNA binding
H7N9|>gi|312126097|gb|ADQ27996.1| polymerase PA [Influenza A virus (A/ruddy turnstone/DE/1538/2000(H7N9))]	ENSP00000341021|NANOS2	1	GO:0003723|RNA binding
H7N9|>gi|312126097|gb|ADQ27996.1| polymerase PA [Influenza A virus (A/ruddy turnstone/DE/1538/2000(H7N9))]	ENSP00000341125|OASL	1	GO:0003723|RNA binding
H7N9|>gi|312126097|gb|ADQ27996.1| polymerase PA [Influenza A virus (A/ruddy turnstone/DE/1538/2000(H7N9))]	ENSP00000341168|NPM1	1	GO:0003723|RNA binding
H7N9|>gi|312126097|gb|ADQ27996.1| polymerase PA [Influenza A virus (A/ruddy turnstone/DE/1538/2000(H7N9))]	ENSP00000341285|HNRNPA1L2	1	GO:0003723|RNA binding
H7N9|>gi|312126097|gb|ADQ27996.1| polymerase PA [Influenza A virus (A/ruddy turnstone/DE/1538/2000(H7N9))]	ENSP00000341583|RBM33	1	GO:0003723|RNA binding
H7N9|>gi|312126097|gb|ADQ27996.1| polymerase PA [Influenza A virus (A/ruddy turnstone/DE/1538/2000(H7N9))]	ENSP00000341660|MRPS5	1	GO:0003723|RNA binding
H7N9|>gi|312126097|gb|ADQ27996.1| polymerase PA [Influenza A virus (A/ruddy turnstone/DE/1538/2000(H7N9))]	ENSP00000341689|ZNF239	1	GO:0003723|RNA binding
H7N9|>gi|312126097|gb|ADQ27996.1| polymerase PA [Influenza A virus (A/ruddy turnstone/DE/1538/2000(H7N9))]	ENSP00000341826|HNRNPA1	1	GO:0003723|RNA binding
H7N9|>gi|312126097|gb|ADQ27996.1| polymerase PA [Influenza A virus (A/ruddy turnstone/DE/1538/2000(H7N9))]	ENSP00000341885|RPS2	1	GO:0003723|RNA binding
H7N9|>gi|312126097|gb|ADQ27996.1| polymerase PA [Influenza A virus (A/ruddy turnstone/DE/1538/2000(H7N9))]	ENSP00000341992|NANOS3	1	GO:0003723|RNA binding
H7N9|>gi|312126097|gb|ADQ27996.1| polymerase PA [Influenza A virus (A/ruddy turnstone/DE/1538/2000(H7N9))]	ENSP00000342278|OAS2	1	GO:0003723|RNA binding
H7N9|>gi|312126097|gb|ADQ27996.1| polymerase PA [Influenza A virus (A/ruddy turnstone/DE/1538/2000(H7N9))]	ENSP00000342332|PTBP1	1	GO:0003723|RNA binding
H7N9|>gi|312126097|gb|ADQ27996.1| polymerase PA [Influenza A virus (A/ruddy turnstone/DE/1538/2000(H7N9))]	ENSP00000342387|NOVA1	1	GO:0003723|RNA binding
H7N9|>gi|312126097|gb|ADQ27996.1| polymerase PA [Influenza A virus (A/ruddy turnstone/DE/1538/2000(H7N9))]	ENSP00000342408|CSDE1	1	GO:0003723|RNA binding
H7N9|>gi|312126097|gb|ADQ27996.1| polymerase PA [Influenza A virus (A/ruddy turnstone/DE/1538/2000(H7N9))]	ENSP00000342438|IMPDH1	1	GO:0003723|RNA binding
H7N9|>gi|312126097|gb|ADQ27996.1| polymerase PA [Influenza A virus (A/ruddy turnstone/DE/1538/2000(H7N9))]	ENSP00000342787|RPL28	1	GO:0003723|RNA binding
H7N9|>gi|312126097|gb|ADQ27996.1| polymerase PA [Influenza A virus (A/ruddy turnstone/DE/1538/2000(H7N9))]	ENSP00000342913|SRSF10	1	GO:0003723|RNA binding
H7N9|>gi|312126097|gb|ADQ27996.1| polymerase PA [Influenza A virus (A/ruddy turnstone/DE/1538/2000(H7N9))]	ENSP00000343054|RBM5	1	GO:0003723|RNA binding
H7N9|>gi|312126097|gb|ADQ27996.1| polymerase PA [Influenza A virus (A/ruddy turnstone/DE/1538/2000(H7N9))]	ENSP00000343081|PUS7L	1	GO:0003723|RNA binding
H7N9|>gi|312126097|gb|ADQ27996.1| polymerase PA [Influenza A virus (A/ruddy turnstone/DE/1538/2000(H7N9))]	ENSP00000343450|EIF4G1	1	GO:0003723|RNA binding
H7N9|>gi|312126097|gb|ADQ27996.1| polymerase PA [Influenza A virus (A/ruddy turnstone/DE/1538/2000(H7N9))]	ENSP00000343488|EARS2	1	GO:0003723|RNA binding
H7N9|>gi|312126097|gb|ADQ27996.1| polymerase PA [Influenza A virus (A/ruddy turnstone/DE/1538/2000(H7N9))]	ENSP00000343557|ZCCHC17	1	GO:0003723|RNA binding
H7N9|>gi|312126097|gb|ADQ27996.1| polymerase PA [Influenza A virus (A/ruddy turnstone/DE/1538/2000(H7N9))]	ENSP00000343745|DICER1	1	GO:0003723|RNA binding
H7N9|>gi|312126097|gb|ADQ27996.1| polymerase PA [Influenza A virus (A/ruddy turnstone/DE/1538/2000(H7N9))]	ENSP00000343869|LARP6	1	GO:0003723|RNA binding
H7N9|>gi|312126097|gb|ADQ27996.1| polymerase PA [Influenza A virus (A/ruddy turnstone/DE/1538/2000(H7N9))]	ENSP00000343900|CPSF4L	1	GO:0003723|RNA binding
H7N9|>gi|312126097|gb|ADQ27996.1| polymerase PA [Influenza A virus (A/ruddy turnstone/DE/1538/2000(H7N9))]	ENSP00000343966|PSPC1	1	GO:0003723|RNA binding
H7N9|>gi|312126097|gb|ADQ27996.1| polymerase PA [Influenza A virus (A/ruddy turnstone/DE/1538/2000(H7N9))]	ENSP00000344149|SRSF10	1	GO:0003723|RNA binding
H7N9|>gi|312126097|gb|ADQ27996.1| polymerase PA [Influenza A virus (A/ruddy turnstone/DE/1538/2000(H7N9))]	ENSP00000344196|RBFOX1	1	GO:0003723|RNA binding
H7N9|>gi|312126097|gb|ADQ27996.1| polymerase PA [Influenza A virus (A/ruddy turnstone/DE/1538/2000(H7N9))]	ENSP00000344214|MBNL2	1	GO:0003723|RNA binding
H7N9|>gi|312126097|gb|ADQ27996.1| polymerase PA [Influenza A virus (A/ruddy turnstone/DE/1538/2000(H7N9))]	ENSP00000344401|LIN28B	1	GO:0003723|RNA binding
H7N9|>gi|312126097|gb|ADQ27996.1| polymerase PA [Influenza A virus (A/ruddy turnstone/DE/1538/2000(H7N9))]	ENSP00000344581|RBM39	1	GO:0003723|RNA binding
H7N9|>gi|312126097|gb|ADQ27996.1| polymerase PA [Influenza A virus (A/ruddy turnstone/DE/1538/2000(H7N9))]	ENSP00000344698|FAM120A	1	GO:0003723|RNA binding
H7N9|>gi|312126097|gb|ADQ27996.1| polymerase PA [Influenza A virus (A/ruddy turnstone/DE/1538/2000(H7N9))]	ENSP00000344950|LARP7	1	GO:0003723|RNA binding
H7N9|>gi|312126097|gb|ADQ27996.1| polymerase PA [Influenza A virus (A/ruddy turnstone/DE/1538/2000(H7N9))]	ENSP00000344954|ZBP1	1	GO:0003723|RNA binding
H7N9|>gi|312126097|gb|ADQ27996.1| polymerase PA [Influenza A virus (A/ruddy turnstone/DE/1538/2000(H7N9))]	ENSP00000345096|IMPDH1	1	GO:0003723|RNA binding
H7N9|>gi|312126097|gb|ADQ27996.1| polymerase PA [Influenza A virus (A/ruddy turnstone/DE/1538/2000(H7N9))]	ENSP00000345156|RPL14	1	GO:0003723|RNA binding
H7N9|>gi|312126097|gb|ADQ27996.1| polymerase PA [Influenza A virus (A/ruddy turnstone/DE/1538/2000(H7N9))]	ENSP00000345412|CPSF7	1	GO:0003723|RNA binding
H7N9|>gi|312126097|gb|ADQ27996.1| polymerase PA [Influenza A virus (A/ruddy turnstone/DE/1538/2000(H7N9))]	ENSP00000345456|PARN	1	GO:0003723|RNA binding
H7N9|>gi|312126097|gb|ADQ27996.1| polymerase PA [Influenza A virus (A/ruddy turnstone/DE/1538/2000(H7N9))]	ENSP00000345924|NANOS1	1	GO:0003723|RNA binding
H7N9|>gi|312126097|gb|ADQ27996.1| polymerase PA [Influenza A virus (A/ruddy turnstone/DE/1538/2000(H7N9))]	ENSP00000346001|RPL3	1	GO:0003723|RNA binding
H7N9|>gi|312126097|gb|ADQ27996.1| polymerase PA [Influenza A virus (A/ruddy turnstone/DE/1538/2000(H7N9))]	ENSP00000346015|RPL27A	1	GO:0003723|RNA binding
H7N9|>gi|312126097|gb|ADQ27996.1| polymerase PA [Influenza A virus (A/ruddy turnstone/DE/1538/2000(H7N9))]	ENSP00000346022|RPL9	1	GO:0003723|RNA binding
H7N9|>gi|312126097|gb|ADQ27996.1| polymerase PA [Influenza A virus (A/ruddy turnstone/DE/1538/2000(H7N9))]	ENSP00000346027|RPL21	1	GO:0003723|RNA binding
H7N9|>gi|312126097|gb|ADQ27996.1| polymerase PA [Influenza A virus (A/ruddy turnstone/DE/1538/2000(H7N9))]	ENSP00000346037|RPLP1	1	GO:0003723|RNA binding
H7N9|>gi|312126097|gb|ADQ27996.1| polymerase PA [Influenza A virus (A/ruddy turnstone/DE/1538/2000(H7N9))]	ENSP00000346050|RPS3A	1	GO:0003723|RNA binding
H7N9|>gi|312126097|gb|ADQ27996.1| polymerase PA [Influenza A virus (A/ruddy turnstone/DE/1538/2000(H7N9))]	ENSP00000346088|RPL22	1	GO:0003723|RNA binding
H7N9|>gi|312126097|gb|ADQ27996.1| polymerase PA [Influenza A virus (A/ruddy turnstone/DE/1538/2000(H7N9))]	ENSP00000346120|DDX21	1	GO:0003723|RNA binding
H7N9|>gi|312126097|gb|ADQ27996.1| polymerase PA [Influenza A virus (A/ruddy turnstone/DE/1538/2000(H7N9))]	ENSP00000346219|IMPDH1	1	GO:0003723|RNA binding
H7N9|>gi|312126097|gb|ADQ27996.1| polymerase PA [Influenza A virus (A/ruddy turnstone/DE/1538/2000(H7N9))]	ENSP00000346236|DDX46	1	GO:0003723|RNA binding
H7N9|>gi|312126097|gb|ADQ27996.1| polymerase PA [Influenza A virus (A/ruddy turnstone/DE/1538/2000(H7N9))]	ENSP00000346426|CELF2	1	GO:0003723|RNA binding
H7N9|>gi|312126097|gb|ADQ27996.1| polymerase PA [Influenza A virus (A/ruddy turnstone/DE/1538/2000(H7N9))]	ENSP00000346444|LARP1B	1	GO:0003723|RNA binding
H7N9|>gi|312126097|gb|ADQ27996.1| polymerase PA [Influenza A virus (A/ruddy turnstone/DE/1538/2000(H7N9))]	ENSP00000346694|HNRNPA2B1	1	GO:0003723|RNA binding
H7N9|>gi|312126097|gb|ADQ27996.1| polymerase PA [Influenza A virus (A/ruddy turnstone/DE/1538/2000(H7N9))]	ENSP00000346726|HNRNPH3	1	GO:0003723|RNA binding
H7N9|>gi|312126097|gb|ADQ27996.1| polymerase PA [Influenza A virus (A/ruddy turnstone/DE/1538/2000(H7N9))]	ENSP00000346867|RPL15	1	GO:0003723|RNA binding
H7N9|>gi|312126097|gb|ADQ27996.1| polymerase PA [Influenza A virus (A/ruddy turnstone/DE/1538/2000(H7N9))]	ENSP00000346917|MOV10L1	1	GO:0003723|RNA binding
H7N9|>gi|312126097|gb|ADQ27996.1| polymerase PA [Influenza A virus (A/ruddy turnstone/DE/1538/2000(H7N9))]	ENSP00000346971|CELF2	1	GO:0003723|RNA binding
H7N9|>gi|312126097|gb|ADQ27996.1| polymerase PA [Influenza A virus (A/ruddy turnstone/DE/1538/2000(H7N9))]	ENSP00000347380|SYNCRIP	1	GO:0003723|RNA binding
H7N9|>gi|312126097|gb|ADQ27996.1| polymerase PA [Influenza A virus (A/ruddy turnstone/DE/1538/2000(H7N9))]	ENSP00000347401|NHP2L1	1	GO:0003723|RNA binding
H7N9|>gi|312126097|gb|ADQ27996.1| polymerase PA [Influenza A virus (A/ruddy turnstone/DE/1538/2000(H7N9))]	ENSP00000347637|MBNL1	1	GO:0003723|RNA binding
H7N9|>gi|312126097|gb|ADQ27996.1| polymerase PA [Influenza A virus (A/ruddy turnstone/DE/1538/2000(H7N9))]	ENSP00000347792|SYNJ2	1	GO:0003723|RNA binding
H7N9|>gi|312126097|gb|ADQ27996.1| polymerase PA [Influenza A virus (A/ruddy turnstone/DE/1538/2000(H7N9))]	ENSP00000347855|RBFOX1	1	GO:0003723|RNA binding
H7N9|>gi|312126097|gb|ADQ27996.1| polymerase PA [Influenza A virus (A/ruddy turnstone/DE/1538/2000(H7N9))]	ENSP00000347897|RSL1D1	1	GO:0003723|RNA binding
H7N9|>gi|312126097|gb|ADQ27996.1| polymerase PA [Influenza A virus (A/ruddy turnstone/DE/1538/2000(H7N9))]	ENSP00000347907|FNBP1	1	GO:0003723|RNA binding
H7N9|>gi|312126097|gb|ADQ27996.1| polymerase PA [Influenza A virus (A/ruddy turnstone/DE/1538/2000(H7N9))]	ENSP00000347959|THOC2	1	GO:0003723|RNA binding
H7N9|>gi|312126097|gb|ADQ27996.1| polymerase PA [Influenza A virus (A/ruddy turnstone/DE/1538/2000(H7N9))]	ENSP00000348026|STAU2	1	GO:0003723|RNA binding
H7N9|>gi|312126097|gb|ADQ27996.1| polymerase PA [Influenza A virus (A/ruddy turnstone/DE/1538/2000(H7N9))]	ENSP00000348066|ZNF638	1	GO:0003723|RNA binding
H7N9|>gi|312126097|gb|ADQ27996.1| polymerase PA [Influenza A virus (A/ruddy turnstone/DE/1538/2000(H7N9))]	ENSP00000348093|HNRNPAB	1	GO:0003723|RNA binding
H7N9|>gi|312126097|gb|ADQ27996.1| polymerase PA [Influenza A virus (A/ruddy turnstone/DE/1538/2000(H7N9))]	ENSP00000348107|C1D	1	GO:0003723|RNA binding
H7N9|>gi|312126097|gb|ADQ27996.1| polymerase PA [Influenza A virus (A/ruddy turnstone/DE/1538/2000(H7N9))]	ENSP00000348108|KHDRBS3	1	GO:0003723|RNA binding
H7N9|>gi|312126097|gb|ADQ27996.1| polymerase PA [Influenza A virus (A/ruddy turnstone/DE/1538/2000(H7N9))]	ENSP00000348111|PCBP4	1	GO:0003723|RNA binding
H7N9|>gi|312126097|gb|ADQ27996.1| polymerase PA [Influenza A virus (A/ruddy turnstone/DE/1538/2000(H7N9))]	ENSP00000348271|DDX19B	1	GO:0003723|RNA binding
H7N9|>gi|312126097|gb|ADQ27996.1| polymerase PA [Influenza A virus (A/ruddy turnstone/DE/1538/2000(H7N9))]	ENSP00000348345|HNRNPF	1	GO:0003723|RNA binding
H7N9|>gi|312126097|gb|ADQ27996.1| polymerase PA [Influenza A virus (A/ruddy turnstone/DE/1538/2000(H7N9))]	ENSP00000348485|CNOT4	1	GO:0003723|RNA binding
H7N9|>gi|312126097|gb|ADQ27996.1| polymerase PA [Influenza A virus (A/ruddy turnstone/DE/1538/2000(H7N9))]	ENSP00000348578|G3BP1	1	GO:0003723|RNA binding
H7N9|>gi|312126097|gb|ADQ27996.1| polymerase PA [Influenza A virus (A/ruddy turnstone/DE/1538/2000(H7N9))]	ENSP00000348708|UPF2	1	GO:0003723|RNA binding
H7N9|>gi|312126097|gb|ADQ27996.1| polymerase PA [Influenza A virus (A/ruddy turnstone/DE/1538/2000(H7N9))]	ENSP00000348722|PUS7	1	GO:0003723|RNA binding
H7N9|>gi|312126097|gb|ADQ27996.1| polymerase PA [Influenza A virus (A/ruddy turnstone/DE/1538/2000(H7N9))]	ENSP00000348904|PPIE	1	GO:0003723|RNA binding
H7N9|>gi|312126097|gb|ADQ27996.1| polymerase PA [Influenza A virus (A/ruddy turnstone/DE/1538/2000(H7N9))]	ENSP00000348984|SON	1	GO:0003723|RNA binding
H7N9|>gi|312126097|gb|ADQ27996.1| polymerase PA [Influenza A virus (A/ruddy turnstone/DE/1538/2000(H7N9))]	ENSP00000349098|ZNF74	1	GO:0003723|RNA binding
H7N9|>gi|312126097|gb|ADQ27996.1| polymerase PA [Influenza A virus (A/ruddy turnstone/DE/1538/2000(H7N9))]	ENSP00000349101|HNRNPA2B1	1	GO:0003723|RNA binding
H7N9|>gi|312126097|gb|ADQ27996.1| polymerase PA [Influenza A virus (A/ruddy turnstone/DE/1538/2000(H7N9))]	ENSP00000349168|HNRNPH1	1	GO:0003723|RNA binding
H7N9|>gi|312126097|gb|ADQ27996.1| polymerase PA [Influenza A virus (A/ruddy turnstone/DE/1538/2000(H7N9))]	ENSP00000349428|PTBP1	1	GO:0003723|RNA binding
H7N9|>gi|312126097|gb|ADQ27996.1| polymerase PA [Influenza A virus (A/ruddy turnstone/DE/1538/2000(H7N9))]	ENSP00000349573|HNRNPF	1	GO:0003723|RNA binding
H7N9|>gi|312126097|gb|ADQ27996.1| polymerase PA [Influenza A virus (A/ruddy turnstone/DE/1538/2000(H7N9))]	ENSP00000349594|ELAVL4	1	GO:0003723|RNA binding
H7N9|>gi|312126097|gb|ADQ27996.1| polymerase PA [Influenza A virus (A/ruddy turnstone/DE/1538/2000(H7N9))]	ENSP00000349748|SFPQ	1	GO:0003723|RNA binding
H7N9|>gi|312126097|gb|ADQ27996.1| polymerase PA [Influenza A virus (A/ruddy turnstone/DE/1538/2000(H7N9))]	ENSP00000349903|SYNJ1	1	GO:0003723|RNA binding
H7N9|>gi|312126097|gb|ADQ27996.1| polymerase PA [Influenza A virus (A/ruddy turnstone/DE/1538/2000(H7N9))]	ENSP00000350028|MOV10	1	GO:0003723|RNA binding
H7N9|>gi|312126097|gb|ADQ27996.1| polymerase PA [Influenza A virus (A/ruddy turnstone/DE/1538/2000(H7N9))]	ENSP00000350064|MBNL1	1	GO:0003723|RNA binding
H7N9|>gi|312126097|gb|ADQ27996.1| polymerase PA [Influenza A virus (A/ruddy turnstone/DE/1538/2000(H7N9))]	ENSP00000350090|HNRNPA1L2	1	GO:0003723|RNA binding
H7N9|>gi|312126097|gb|ADQ27996.1| polymerase PA [Influenza A virus (A/ruddy turnstone/DE/1538/2000(H7N9))]	ENSP00000350170|FXR1	1	GO:0003723|RNA binding
H7N9|>gi|312126097|gb|ADQ27996.1| polymerase PA [Influenza A virus (A/ruddy turnstone/DE/1538/2000(H7N9))]	ENSP00000350221|UPF2	1	GO:0003723|RNA binding
H7N9|>gi|312126097|gb|ADQ27996.1| polymerase PA [Influenza A virus (A/ruddy turnstone/DE/1538/2000(H7N9))]	ENSP00000350283|BRCA1	1	GO:0003723|RNA binding
H7N9|>gi|312126097|gb|ADQ27996.1| polymerase PA [Influenza A virus (A/ruddy turnstone/DE/1538/2000(H7N9))]	ENSP00000350352|TRMT1	1	GO:0003723|RNA binding
H7N9|>gi|312126097|gb|ADQ27996.1| polymerase PA [Influenza A virus (A/ruddy turnstone/DE/1538/2000(H7N9))]	ENSP00000350409|UNC50	1	GO:0003723|RNA binding
H7N9|>gi|312126097|gb|ADQ27996.1| polymerase PA [Influenza A virus (A/ruddy turnstone/DE/1538/2000(H7N9))]	ENSP00000350518|G3BP2	1	GO:0003723|RNA binding
H7N9|>gi|312126097|gb|ADQ27996.1| polymerase PA [Influenza A virus (A/ruddy turnstone/DE/1538/2000(H7N9))]	ENSP00000350698|DDX47	1	GO:0003723|RNA binding
H7N9|>gi|312126097|gb|ADQ27996.1| polymerase PA [Influenza A virus (A/ruddy turnstone/DE/1538/2000(H7N9))]	ENSP00000350820|MTPAP	1	GO:0003723|RNA binding
H7N9|>gi|312126097|gb|ADQ27996.1| polymerase PA [Influenza A virus (A/ruddy turnstone/DE/1538/2000(H7N9))]	ENSP00000350877|SRSF2	1	GO:0003723|RNA binding
H7N9|>gi|312126097|gb|ADQ27996.1| polymerase PA [Influenza A virus (A/ruddy turnstone/DE/1538/2000(H7N9))]	ENSP00000351021|RPL21	1	GO:0003723|RNA binding
H7N9|>gi|312126097|gb|ADQ27996.1| polymerase PA [Influenza A virus (A/ruddy turnstone/DE/1538/2000(H7N9))]	ENSP00000351027|TRDMT1	1	GO:0003723|RNA binding
H7N9|>gi|312126097|gb|ADQ27996.1| polymerase PA [Influenza A virus (A/ruddy turnstone/DE/1538/2000(H7N9))]	ENSP00000351108|HNRNPAB	1	GO:0003723|RNA binding
H7N9|>gi|312126097|gb|ADQ27996.1| polymerase PA [Influenza A virus (A/ruddy turnstone/DE/1538/2000(H7N9))]	ENSP00000351136|HNRPLL	1	GO:0003723|RNA binding
H7N9|>gi|312126097|gb|ADQ27996.1| polymerase PA [Influenza A virus (A/ruddy turnstone/DE/1538/2000(H7N9))]	ENSP00000351329|CSDE1	1	GO:0003723|RNA binding
H7N9|>gi|312126097|gb|ADQ27996.1| polymerase PA [Influenza A virus (A/ruddy turnstone/DE/1538/2000(H7N9))]	ENSP00000351409|CELF1	1	GO:0003723|RNA binding
H7N9|>gi|312126097|gb|ADQ27996.1| polymerase PA [Influenza A virus (A/ruddy turnstone/DE/1538/2000(H7N9))]	ENSP00000351416|ANKRD17	1	GO:0003723|RNA binding
H7N9|>gi|312126097|gb|ADQ27996.1| polymerase PA [Influenza A virus (A/ruddy turnstone/DE/1538/2000(H7N9))]	ENSP00000351723|NOL8	1	GO:0003723|RNA binding
H7N9|>gi|312126097|gb|ADQ27996.1| polymerase PA [Influenza A virus (A/ruddy turnstone/DE/1538/2000(H7N9))]	ENSP00000352162|ELAVL3	1	GO:0003723|RNA binding
H7N9|>gi|312126097|gb|ADQ27996.1| polymerase PA [Influenza A virus (A/ruddy turnstone/DE/1538/2000(H7N9))]	ENSP00000352228|PCBP2	1	GO:0003723|RNA binding
H7N9|>gi|312126097|gb|ADQ27996.1| polymerase PA [Influenza A virus (A/ruddy turnstone/DE/1538/2000(H7N9))]	ENSP00000352250|ZC3H14	1	GO:0003723|RNA binding
H7N9|>gi|312126097|gb|ADQ27996.1| polymerase PA [Influenza A virus (A/ruddy turnstone/DE/1538/2000(H7N9))]	ENSP00000352308|DDX42	1	GO:0003723|RNA binding
H7N9|>gi|312126097|gb|ADQ27996.1| polymerase PA [Influenza A virus (A/ruddy turnstone/DE/1538/2000(H7N9))]	ENSP00000352328|RBFOX2	1	GO:0003723|RNA binding
H7N9|>gi|312126097|gb|ADQ27996.1| polymerase PA [Influenza A virus (A/ruddy turnstone/DE/1538/2000(H7N9))]	ENSP00000352438|PCBP2	1	GO:0003723|RNA binding
H7N9|>gi|312126097|gb|ADQ27996.1| polymerase PA [Influenza A virus (A/ruddy turnstone/DE/1538/2000(H7N9))]	ENSP00000352516|DNMT1	1	GO:0003723|RNA binding
H7N9|>gi|312126097|gb|ADQ27996.1| polymerase PA [Influenza A virus (A/ruddy turnstone/DE/1538/2000(H7N9))]	ENSP00000352612|ELAVL2	1	GO:0003723|RNA binding
H7N9|>gi|312126097|gb|ADQ27996.1| polymerase PA [Influenza A virus (A/ruddy turnstone/DE/1538/2000(H7N9))]	ENSP00000352668|RBM12	1	GO:0003723|RNA binding
H7N9|>gi|312126097|gb|ADQ27996.1| polymerase PA [Influenza A virus (A/ruddy turnstone/DE/1538/2000(H7N9))]	ENSP00000352678|SUPV3L1	1	GO:0003723|RNA binding
H7N9|>gi|312126097|gb|ADQ27996.1| polymerase PA [Influenza A virus (A/ruddy turnstone/DE/1538/2000(H7N9))]	ENSP00000352738|G3BP2	1	GO:0003723|RNA binding
H7N9|>gi|312126097|gb|ADQ27996.1| polymerase PA [Influenza A virus (A/ruddy turnstone/DE/1538/2000(H7N9))]	ENSP00000352911|NUDT16	1	GO:0003723|RNA binding
H7N9|>gi|312126097|gb|ADQ27996.1| polymerase PA [Influenza A virus (A/ruddy turnstone/DE/1538/2000(H7N9))]	ENSP00000352956|RBM23	1	GO:0003723|RNA binding
H7N9|>gi|312126097|gb|ADQ27996.1| polymerase PA [Influenza A virus (A/ruddy turnstone/DE/1538/2000(H7N9))]	ENSP00000353089|SRSF2	1	GO:0003723|RNA binding
H7N9|>gi|312126097|gb|ADQ27996.1| polymerase PA [Influenza A virus (A/ruddy turnstone/DE/1538/2000(H7N9))]	ENSP00000353284|DDX3Y	1	GO:0003723|RNA binding
H7N9|>gi|312126097|gb|ADQ27996.1| polymerase PA [Influenza A virus (A/ruddy turnstone/DE/1538/2000(H7N9))]	ENSP00000353552|HNRNPK	1	GO:0003723|RNA binding
H7N9|>gi|312126097|gb|ADQ27996.1| polymerase PA [Influenza A virus (A/ruddy turnstone/DE/1538/2000(H7N9))]	ENSP00000353584|DIS3L2	1	GO:0003723|RNA binding
H7N9|>gi|312126097|gb|ADQ27996.1| polymerase PA [Influenza A virus (A/ruddy turnstone/DE/1538/2000(H7N9))]	ENSP00000353638|PPARGC1B	1	GO:0003723|RNA binding
H7N9|>gi|312126097|gb|ADQ27996.1| polymerase PA [Influenza A virus (A/ruddy turnstone/DE/1538/2000(H7N9))]	ENSP00000353663|RBM42	1	GO:0003723|RNA binding
H7N9|>gi|312126097|gb|ADQ27996.1| polymerase PA [Influenza A virus (A/ruddy turnstone/DE/1538/2000(H7N9))]	ENSP00000353741|ETF1	1	GO:0003723|RNA binding
H7N9|>gi|312126097|gb|ADQ27996.1| polymerase PA [Influenza A virus (A/ruddy turnstone/DE/1538/2000(H7N9))]	ENSP00000353769|SCAF1	1	GO:0003723|RNA binding
H7N9|>gi|312126097|gb|ADQ27996.1| polymerase PA [Influenza A virus (A/ruddy turnstone/DE/1538/2000(H7N9))]	ENSP00000353920|ADARB1	1	GO:0003723|RNA binding
H7N9|>gi|312126097|gb|ADQ27996.1| polymerase PA [Influenza A virus (A/ruddy turnstone/DE/1538/2000(H7N9))]	ENSP00000354021|HNRNPA2B1	1	GO:0003723|RNA binding
H7N9|>gi|312126097|gb|ADQ27996.1| polymerase PA [Influenza A virus (A/ruddy turnstone/DE/1538/2000(H7N9))]	ENSP00000354085|ANKHD1	1	GO:0003723|RNA binding
H7N9|>gi|312126097|gb|ADQ27996.1| polymerase PA [Influenza A virus (A/ruddy turnstone/DE/1538/2000(H7N9))]	ENSP00000354125|EIF3B	1	GO:0003723|RNA binding
H7N9|>gi|312126097|gb|ADQ27996.1| polymerase PA [Influenza A virus (A/ruddy turnstone/DE/1538/2000(H7N9))]	ENSP00000354152|MTHFSD	1	GO:0003723|RNA binding
H7N9|>gi|312126097|gb|ADQ27996.1| polymerase PA [Influenza A virus (A/ruddy turnstone/DE/1538/2000(H7N9))]	ENSP00000354346|MATR3	1	GO:0003723|RNA binding
H7N9|>gi|312126097|gb|ADQ27996.1| polymerase PA [Influenza A virus (A/ruddy turnstone/DE/1538/2000(H7N9))]	ENSP00000354370|PUM2	1	GO:0003723|RNA binding
H7N9|>gi|312126097|gb|ADQ27996.1| polymerase PA [Influenza A virus (A/ruddy turnstone/DE/1538/2000(H7N9))]	ENSP00000354437|RBM39	1	GO:0003723|RNA binding
H7N9|>gi|312126097|gb|ADQ27996.1| polymerase PA [Influenza A virus (A/ruddy turnstone/DE/1538/2000(H7N9))]	ENSP00000354539|NXF5	1	GO:0003723|RNA binding
H7N9|>gi|312126097|gb|ADQ27996.1| polymerase PA [Influenza A virus (A/ruddy turnstone/DE/1538/2000(H7N9))]	ENSP00000354580|MRPL21	1	GO:0003723|RNA binding
H7N9|>gi|312126097|gb|ADQ27996.1| polymerase PA [Influenza A virus (A/ruddy turnstone/DE/1538/2000(H7N9))]	ENSP00000354639|CELF1	1	GO:0003723|RNA binding
H7N9|>gi|312126097|gb|ADQ27996.1| polymerase PA [Influenza A virus (A/ruddy turnstone/DE/1538/2000(H7N9))]	ENSP00000354673|CNOT4	1	GO:0003723|RNA binding
H7N9|>gi|312126097|gb|ADQ27996.1| polymerase PA [Influenza A virus (A/ruddy turnstone/DE/1538/2000(H7N9))]	ENSP00000354722|EIF1AY	1	GO:0003723|RNA binding
H7N9|>gi|312126097|gb|ADQ27996.1| polymerase PA [Influenza A virus (A/ruddy turnstone/DE/1538/2000(H7N9))]	ENSP00000354739|RPL12	1	GO:0003723|RNA binding
H7N9|>gi|312126097|gb|ADQ27996.1| polymerase PA [Influenza A virus (A/ruddy turnstone/DE/1538/2000(H7N9))]	ENSP00000354867|QKI	1	GO:0003723|RNA binding
H7N9|>gi|312126097|gb|ADQ27996.1| polymerase PA [Influenza A virus (A/ruddy turnstone/DE/1538/2000(H7N9))]	ENSP00000354951|QKI	1	GO:0003723|RNA binding
H7N9|>gi|312126097|gb|ADQ27996.1| polymerase PA [Influenza A virus (A/ruddy turnstone/DE/1538/2000(H7N9))]	ENSP00000355011|ILF2	1	GO:0003723|RNA binding
H7N9|>gi|312126097|gb|ADQ27996.1| polymerase PA [Influenza A virus (A/ruddy turnstone/DE/1538/2000(H7N9))]	ENSP00000355028|DZIP3	1	GO:0003723|RNA binding
H7N9|>gi|312126097|gb|ADQ27996.1| polymerase PA [Influenza A virus (A/ruddy turnstone/DE/1538/2000(H7N9))]	ENSP00000355094|QKI	1	GO:0003723|RNA binding
H7N9|>gi|312126097|gb|ADQ27996.1| polymerase PA [Influenza A virus (A/ruddy turnstone/DE/1538/2000(H7N9))]	ENSP00000355115|FMR1	1	GO:0003723|RNA binding
H7N9|>gi|312126097|gb|ADQ27996.1| polymerase PA [Influenza A virus (A/ruddy turnstone/DE/1538/2000(H7N9))]	ENSP00000355286|NXF5	1	GO:0003723|RNA binding
H7N9|>gi|312126097|gb|ADQ27996.1| polymerase PA [Influenza A virus (A/ruddy turnstone/DE/1538/2000(H7N9))]	ENSP00000355315|RPL39	1	GO:0003723|RNA binding
H7N9|>gi|312126097|gb|ADQ27996.1| polymerase PA [Influenza A virus (A/ruddy turnstone/DE/1538/2000(H7N9))]	ENSP00000355565|RBM34	1	GO:0003723|RNA binding
H7N9|>gi|312126097|gb|ADQ27996.1| polymerase PA [Influenza A virus (A/ruddy turnstone/DE/1538/2000(H7N9))]	ENSP00000355804|SRP9	1	GO:0003723|RNA binding
H7N9|>gi|312126097|gb|ADQ27996.1| polymerase PA [Influenza A virus (A/ruddy turnstone/DE/1538/2000(H7N9))]	ENSP00000355890|EPRS	1	GO:0003723|RNA binding
H7N9|>gi|312126097|gb|ADQ27996.1| polymerase PA [Influenza A virus (A/ruddy turnstone/DE/1538/2000(H7N9))]	ENSP00000356079|SYNJ2	1	GO:0003723|RNA binding
H7N9|>gi|312126097|gb|ADQ27996.1| polymerase PA [Influenza A virus (A/ruddy turnstone/DE/1538/2000(H7N9))]	ENSP00000356081|EIF2D	1	GO:0003723|RNA binding
H7N9|>gi|312126097|gb|ADQ27996.1| polymerase PA [Influenza A virus (A/ruddy turnstone/DE/1538/2000(H7N9))]	ENSP00000356088|SYNJ2	1	GO:0003723|RNA binding
H7N9|>gi|312126097|gb|ADQ27996.1| polymerase PA [Influenza A virus (A/ruddy turnstone/DE/1538/2000(H7N9))]	ENSP00000356146|SCAF8	1	GO:0003723|RNA binding
H7N9|>gi|312126097|gb|ADQ27996.1| polymerase PA [Influenza A virus (A/ruddy turnstone/DE/1538/2000(H7N9))]	ENSP00000356411|TROVE2	1	GO:0003723|RNA binding
H7N9|>gi|312126097|gb|ADQ27996.1| polymerase PA [Influenza A virus (A/ruddy turnstone/DE/1538/2000(H7N9))]	ENSP00000356413|TROVE2	1	GO:0003723|RNA binding
H7N9|>gi|312126097|gb|ADQ27996.1| polymerase PA [Influenza A virus (A/ruddy turnstone/DE/1538/2000(H7N9))]	ENSP00000356414|TROVE2	1	GO:0003723|RNA binding
H7N9|>gi|312126097|gb|ADQ27996.1| polymerase PA [Influenza A virus (A/ruddy turnstone/DE/1538/2000(H7N9))]	ENSP00000356415|TROVE2	1	GO:0003723|RNA binding
H7N9|>gi|312126097|gb|ADQ27996.1| polymerase PA [Influenza A virus (A/ruddy turnstone/DE/1538/2000(H7N9))]	ENSP00000356416|TROVE2	1	GO:0003723|RNA binding
H7N9|>gi|312126097|gb|ADQ27996.1| polymerase PA [Influenza A virus (A/ruddy turnstone/DE/1538/2000(H7N9))]	ENSP00000356474|TRMT1L	1	GO:0003723|RNA binding
H7N9|>gi|312126097|gb|ADQ27996.1| polymerase PA [Influenza A virus (A/ruddy turnstone/DE/1538/2000(H7N9))]	ENSP00000356476|TRMT1L	1	GO:0003723|RNA binding
H7N9|>gi|312126097|gb|ADQ27996.1| polymerase PA [Influenza A virus (A/ruddy turnstone/DE/1538/2000(H7N9))]	ENSP00000356530|RNASEL	1	GO:0003723|RNA binding
H7N9|>gi|312126097|gb|ADQ27996.1| polymerase PA [Influenza A virus (A/ruddy turnstone/DE/1538/2000(H7N9))]	ENSP00000357456|ADAR	1	GO:0003723|RNA binding
H7N9|>gi|312126097|gb|ADQ27996.1| polymerase PA [Influenza A virus (A/ruddy turnstone/DE/1538/2000(H7N9))]	ENSP00000357459|ADAR	1	GO:0003723|RNA binding
H7N9|>gi|312126097|gb|ADQ27996.1| polymerase PA [Influenza A virus (A/ruddy turnstone/DE/1538/2000(H7N9))]	ENSP00000357465|TDRD10	1	GO:0003723|RNA binding
H7N9|>gi|312126097|gb|ADQ27996.1| polymerase PA [Influenza A virus (A/ruddy turnstone/DE/1538/2000(H7N9))]	ENSP00000357467|TDRD10	1	GO:0003723|RNA binding
H7N9|>gi|312126097|gb|ADQ27996.1| polymerase PA [Influenza A virus (A/ruddy turnstone/DE/1538/2000(H7N9))]	ENSP00000357670|ILF2	1	GO:0003723|RNA binding
H7N9|>gi|312126097|gb|ADQ27996.1| polymerase PA [Influenza A virus (A/ruddy turnstone/DE/1538/2000(H7N9))]	ENSP00000357673|ILF2	1	GO:0003723|RNA binding
H7N9|>gi|312126097|gb|ADQ27996.1| polymerase PA [Influenza A virus (A/ruddy turnstone/DE/1538/2000(H7N9))]	ENSP00000357676|CHTOP	1	GO:0003723|RNA binding
H7N9|>gi|312126097|gb|ADQ27996.1| polymerase PA [Influenza A virus (A/ruddy turnstone/DE/1538/2000(H7N9))]	ENSP00000357679|CHTOP	1	GO:0003723|RNA binding
H7N9|>gi|312126097|gb|ADQ27996.1| polymerase PA [Influenza A virus (A/ruddy turnstone/DE/1538/2000(H7N9))]	ENSP00000357683|CHTOP	1	GO:0003723|RNA binding
H7N9|>gi|312126097|gb|ADQ27996.1| polymerase PA [Influenza A virus (A/ruddy turnstone/DE/1538/2000(H7N9))]	ENSP00000357812|TDRKH	1	GO:0003723|RNA binding
H7N9|>gi|312126097|gb|ADQ27996.1| polymerase PA [Influenza A virus (A/ruddy turnstone/DE/1538/2000(H7N9))]	ENSP00000357813|TDRKH	1	GO:0003723|RNA binding
H7N9|>gi|312126097|gb|ADQ27996.1| polymerase PA [Influenza A virus (A/ruddy turnstone/DE/1538/2000(H7N9))]	ENSP00000357815|TDRKH	1	GO:0003723|RNA binding
H7N9|>gi|312126097|gb|ADQ27996.1| polymerase PA [Influenza A virus (A/ruddy turnstone/DE/1538/2000(H7N9))]	ENSP00000357817|TDRKH	1	GO:0003723|RNA binding
H7N9|>gi|312126097|gb|ADQ27996.1| polymerase PA [Influenza A virus (A/ruddy turnstone/DE/1538/2000(H7N9))]	ENSP00000357819|TDRKH	1	GO:0003723|RNA binding
H7N9|>gi|312126097|gb|ADQ27996.1| polymerase PA [Influenza A virus (A/ruddy turnstone/DE/1538/2000(H7N9))]	ENSP00000358089|TIAL1	1	GO:0003723|RNA binding
H7N9|>gi|312126097|gb|ADQ27996.1| polymerase PA [Influenza A virus (A/ruddy turnstone/DE/1538/2000(H7N9))]	ENSP00000358313|RBM8A	1	GO:0003723|RNA binding
H7N9|>gi|312126097|gb|ADQ27996.1| polymerase PA [Influenza A virus (A/ruddy turnstone/DE/1538/2000(H7N9))]	ENSP00000358532|RBM20	1	GO:0003723|RNA binding
H7N9|>gi|312126097|gb|ADQ27996.1| polymerase PA [Influenza A virus (A/ruddy turnstone/DE/1538/2000(H7N9))]	ENSP00000358563|DKC1	1	GO:0003723|RNA binding
H7N9|>gi|312126097|gb|ADQ27996.1| polymerase PA [Influenza A virus (A/ruddy turnstone/DE/1538/2000(H7N9))]	ENSP00000358605|SMNDC1	1	GO:0003723|RNA binding
H7N9|>gi|312126097|gb|ADQ27996.1| polymerase PA [Influenza A virus (A/ruddy turnstone/DE/1538/2000(H7N9))]	ENSP00000358616|SMNDC1	1	GO:0003723|RNA binding
H7N9|>gi|312126097|gb|ADQ27996.1| polymerase PA [Influenza A virus (A/ruddy turnstone/DE/1538/2000(H7N9))]	ENSP00000358635|SYNCRIP	1	GO:0003723|RNA binding
H7N9|>gi|312126097|gb|ADQ27996.1| polymerase PA [Influenza A virus (A/ruddy turnstone/DE/1538/2000(H7N9))]	ENSP00000358659|MOV10	1	GO:0003723|RNA binding
H7N9|>gi|312126097|gb|ADQ27996.1| polymerase PA [Influenza A virus (A/ruddy turnstone/DE/1538/2000(H7N9))]	ENSP00000358799|RBM15	1	GO:0003723|RNA binding
H7N9|>gi|312126097|gb|ADQ27996.1| polymerase PA [Influenza A virus (A/ruddy turnstone/DE/1538/2000(H7N9))]	ENSP00000358812|PDCD11	1	GO:0003723|RNA binding
H7N9|>gi|312126097|gb|ADQ27996.1| polymerase PA [Influenza A virus (A/ruddy turnstone/DE/1538/2000(H7N9))]	ENSP00000359029|PPRC1	1	GO:0003723|RNA binding
H7N9|>gi|312126097|gb|ADQ27996.1| polymerase PA [Influenza A virus (A/ruddy turnstone/DE/1538/2000(H7N9))]	ENSP00000359048|HENMT1	1	GO:0003723|RNA binding
H7N9|>gi|312126097|gb|ADQ27996.1| polymerase PA [Influenza A virus (A/ruddy turnstone/DE/1538/2000(H7N9))]	ENSP00000359049|HENMT1	1	GO:0003723|RNA binding
H7N9|>gi|312126097|gb|ADQ27996.1| polymerase PA [Influenza A virus (A/ruddy turnstone/DE/1538/2000(H7N9))]	ENSP00000359146|RTCA	1	GO:0003723|RNA binding
H7N9|>gi|312126097|gb|ADQ27996.1| polymerase PA [Influenza A virus (A/ruddy turnstone/DE/1538/2000(H7N9))]	ENSP00000359216|PTBP2	1	GO:0003723|RNA binding
H7N9|>gi|312126097|gb|ADQ27996.1| polymerase PA [Influenza A virus (A/ruddy turnstone/DE/1538/2000(H7N9))]	ENSP00000359217|PTBP2	1	GO:0003723|RNA binding
H7N9|>gi|312126097|gb|ADQ27996.1| polymerase PA [Influenza A virus (A/ruddy turnstone/DE/1538/2000(H7N9))]	ENSP00000359345|RPL5	1	GO:0003723|RNA binding
H7N9|>gi|312126097|gb|ADQ27996.1| polymerase PA [Influenza A virus (A/ruddy turnstone/DE/1538/2000(H7N9))]	ENSP00000359361|DDX43	1	GO:0003723|RNA binding
H7N9|>gi|312126097|gb|ADQ27996.1| polymerase PA [Influenza A virus (A/ruddy turnstone/DE/1538/2000(H7N9))]	ENSP00000359384|OOEP	1	GO:0003723|RNA binding
H7N9|>gi|312126097|gb|ADQ27996.1| polymerase PA [Influenza A virus (A/ruddy turnstone/DE/1538/2000(H7N9))]	ENSP00000359396|DPPA5	1	GO:0003723|RNA binding
H7N9|>gi|312126097|gb|ADQ27996.1| polymerase PA [Influenza A virus (A/ruddy turnstone/DE/1538/2000(H7N9))]	ENSP00000359411|KHDC1	1	GO:0003723|RNA binding
H7N9|>gi|312126097|gb|ADQ27996.1| polymerase PA [Influenza A virus (A/ruddy turnstone/DE/1538/2000(H7N9))]	ENSP00000359501|FMR1	1	GO:0003723|RNA binding
H7N9|>gi|312126097|gb|ADQ27996.1| polymerase PA [Influenza A virus (A/ruddy turnstone/DE/1538/2000(H7N9))]	ENSP00000359502|FMR1	1	GO:0003723|RNA binding
H7N9|>gi|312126097|gb|ADQ27996.1| polymerase PA [Influenza A virus (A/ruddy turnstone/DE/1538/2000(H7N9))]	ENSP00000359506|FMR1	1	GO:0003723|RNA binding
H7N9|>gi|312126097|gb|ADQ27996.1| polymerase PA [Influenza A virus (A/ruddy turnstone/DE/1538/2000(H7N9))]	ENSP00000359508|FMR1	1	GO:0003723|RNA binding
H7N9|>gi|312126097|gb|ADQ27996.1| polymerase PA [Influenza A virus (A/ruddy turnstone/DE/1538/2000(H7N9))]	ENSP00000359645|RBMX	1	GO:0003723|RNA binding
H7N9|>gi|312126097|gb|ADQ27996.1| polymerase PA [Influenza A virus (A/ruddy turnstone/DE/1538/2000(H7N9))]	ENSP00000359688|RPF1	1	GO:0003723|RNA binding
H7N9|>gi|312126097|gb|ADQ27996.1| polymerase PA [Influenza A virus (A/ruddy turnstone/DE/1538/2000(H7N9))]	ENSP00000359690|RPF1	1	GO:0003723|RNA binding
H7N9|>gi|312126097|gb|ADQ27996.1| polymerase PA [Influenza A virus (A/ruddy turnstone/DE/1538/2000(H7N9))]	ENSP00000359803|FUBP1	1	GO:0003723|RNA binding
H7N9|>gi|312126097|gb|ADQ27996.1| polymerase PA [Influenza A virus (A/ruddy turnstone/DE/1538/2000(H7N9))]	ENSP00000359804|FUBP1	1	GO:0003723|RNA binding
H7N9|>gi|312126097|gb|ADQ27996.1| polymerase PA [Influenza A virus (A/ruddy turnstone/DE/1538/2000(H7N9))]	ENSP00000359939|EXOSC1	1	GO:0003723|RNA binding
H7N9|>gi|312126097|gb|ADQ27996.1| polymerase PA [Influenza A virus (A/ruddy turnstone/DE/1538/2000(H7N9))]	ENSP00000359958|ZRANB2	1	GO:0003723|RNA binding
H7N9|>gi|312126097|gb|ADQ27996.1| polymerase PA [Influenza A virus (A/ruddy turnstone/DE/1538/2000(H7N9))]	ENSP00000359988|SRSF11	1	GO:0003723|RNA binding
H7N9|>gi|312126097|gb|ADQ27996.1| polymerase PA [Influenza A virus (A/ruddy turnstone/DE/1538/2000(H7N9))]	ENSP00000359989|SRSF11	1	GO:0003723|RNA binding
H7N9|>gi|312126097|gb|ADQ27996.1| polymerase PA [Influenza A virus (A/ruddy turnstone/DE/1538/2000(H7N9))]	ENSP00000360112|RAVER2	1	GO:0003723|RNA binding
H7N9|>gi|312126097|gb|ADQ27996.1| polymerase PA [Influenza A virus (A/ruddy turnstone/DE/1538/2000(H7N9))]	ENSP00000360215|ZBP1	1	GO:0003723|RNA binding
H7N9|>gi|312126097|gb|ADQ27996.1| polymerase PA [Influenza A virus (A/ruddy turnstone/DE/1538/2000(H7N9))]	ENSP00000360286|RAE1	1	GO:0003723|RNA binding
H7N9|>gi|312126097|gb|ADQ27996.1| polymerase PA [Influenza A virus (A/ruddy turnstone/DE/1538/2000(H7N9))]	ENSP00000360365|MCTS1	1	GO:0003723|RNA binding
H7N9|>gi|312126097|gb|ADQ27996.1| polymerase PA [Influenza A virus (A/ruddy turnstone/DE/1538/2000(H7N9))]	ENSP00000360367|MCTS1	1	GO:0003723|RNA binding
H7N9|>gi|312126097|gb|ADQ27996.1| polymerase PA [Influenza A virus (A/ruddy turnstone/DE/1538/2000(H7N9))]	ENSP00000360525|MAGOH	1	GO:0003723|RNA binding
H7N9|>gi|312126097|gb|ADQ27996.1| polymerase PA [Influenza A virus (A/ruddy turnstone/DE/1538/2000(H7N9))]	ENSP00000360532|CDC5L	1	GO:0003723|RNA binding
H7N9|>gi|312126097|gb|ADQ27996.1| polymerase PA [Influenza A virus (A/ruddy turnstone/DE/1538/2000(H7N9))]	ENSP00000360884|ELAVL4	1	GO:0003723|RNA binding
H7N9|>gi|312126097|gb|ADQ27996.1| polymerase PA [Influenza A virus (A/ruddy turnstone/DE/1538/2000(H7N9))]	ENSP00000360886|ELAVL4	1	GO:0003723|RNA binding
H7N9|>gi|312126097|gb|ADQ27996.1| polymerase PA [Influenza A virus (A/ruddy turnstone/DE/1538/2000(H7N9))]	ENSP00000360888|ELAVL4	1	GO:0003723|RNA binding
H7N9|>gi|312126097|gb|ADQ27996.1| polymerase PA [Influenza A virus (A/ruddy turnstone/DE/1538/2000(H7N9))]	ENSP00000360889|ELAVL4	1	GO:0003723|RNA binding
H7N9|>gi|312126097|gb|ADQ27996.1| polymerase PA [Influenza A virus (A/ruddy turnstone/DE/1538/2000(H7N9))]	ENSP00000360892|ELAVL4	1	GO:0003723|RNA binding
H7N9|>gi|312126097|gb|ADQ27996.1| polymerase PA [Influenza A virus (A/ruddy turnstone/DE/1538/2000(H7N9))]	ENSP00000360922|STAU1	1	GO:0003723|RNA binding
H7N9|>gi|312126097|gb|ADQ27996.1| polymerase PA [Influenza A virus (A/ruddy turnstone/DE/1538/2000(H7N9))]	ENSP00000361076|RPL7A	1	GO:0003723|RNA binding
H7N9|>gi|312126097|gb|ADQ27996.1| polymerase PA [Influenza A virus (A/ruddy turnstone/DE/1538/2000(H7N9))]	ENSP00000361092|SURF6	1	GO:0003723|RNA binding
H7N9|>gi|312126097|gb|ADQ27996.1| polymerase PA [Influenza A virus (A/ruddy turnstone/DE/1538/2000(H7N9))]	ENSP00000361226|DDX31	1	GO:0003723|RNA binding
H7N9|>gi|312126097|gb|ADQ27996.1| polymerase PA [Influenza A virus (A/ruddy turnstone/DE/1538/2000(H7N9))]	ENSP00000361228|DDX31	1	GO:0003723|RNA binding
H7N9|>gi|312126097|gb|ADQ27996.1| polymerase PA [Influenza A virus (A/ruddy turnstone/DE/1538/2000(H7N9))]	ENSP00000361232|DDX31	1	GO:0003723|RNA binding
H7N9|>gi|312126097|gb|ADQ27996.1| polymerase PA [Influenza A virus (A/ruddy turnstone/DE/1538/2000(H7N9))]	ENSP00000361451|FUBP3	1	GO:0003723|RNA binding
H7N9|>gi|312126097|gb|ADQ27996.1| polymerase PA [Influenza A virus (A/ruddy turnstone/DE/1538/2000(H7N9))]	ENSP00000361493|FNBP1	1	GO:0003723|RNA binding
H7N9|>gi|312126097|gb|ADQ27996.1| polymerase PA [Influenza A virus (A/ruddy turnstone/DE/1538/2000(H7N9))]	ENSP00000361557|RBM41	1	GO:0003723|RNA binding
H7N9|>gi|312126097|gb|ADQ27996.1| polymerase PA [Influenza A virus (A/ruddy turnstone/DE/1538/2000(H7N9))]	ENSP00000361565|RBM41	1	GO:0003723|RNA binding
H7N9|>gi|312126097|gb|ADQ27996.1| polymerase PA [Influenza A virus (A/ruddy turnstone/DE/1538/2000(H7N9))]	ENSP00000361626|YBX1	1	GO:0003723|RNA binding
H7N9|>gi|312126097|gb|ADQ27996.1| polymerase PA [Influenza A virus (A/ruddy turnstone/DE/1538/2000(H7N9))]	ENSP00000361835|NXF2B	1	GO:0003723|RNA binding
H7N9|>gi|312126097|gb|ADQ27996.1| polymerase PA [Influenza A virus (A/ruddy turnstone/DE/1538/2000(H7N9))]	ENSP00000361836|NXF2B	1	GO:0003723|RNA binding
H7N9|>gi|312126097|gb|ADQ27996.1| polymerase PA [Influenza A virus (A/ruddy turnstone/DE/1538/2000(H7N9))]	ENSP00000361838|NXF2B	1	GO:0003723|RNA binding
H7N9|>gi|312126097|gb|ADQ27996.1| polymerase PA [Influenza A virus (A/ruddy turnstone/DE/1538/2000(H7N9))]	ENSP00000361843|NXF2	1	GO:0003723|RNA binding
H7N9|>gi|312126097|gb|ADQ27996.1| polymerase PA [Influenza A virus (A/ruddy turnstone/DE/1538/2000(H7N9))]	ENSP00000361844|NXF2	1	GO:0003723|RNA binding
H7N9|>gi|312126097|gb|ADQ27996.1| polymerase PA [Influenza A virus (A/ruddy turnstone/DE/1538/2000(H7N9))]	ENSP00000361849|NXF2	1	GO:0003723|RNA binding
H7N9|>gi|312126097|gb|ADQ27996.1| polymerase PA [Influenza A virus (A/ruddy turnstone/DE/1538/2000(H7N9))]	ENSP00000361889|NXF5	1	GO:0003723|RNA binding
H7N9|>gi|312126097|gb|ADQ27996.1| polymerase PA [Influenza A virus (A/ruddy turnstone/DE/1538/2000(H7N9))]	ENSP00000361906|PABPC1L	1	GO:0003723|RNA binding
H7N9|>gi|312126097|gb|ADQ27996.1| polymerase PA [Influenza A virus (A/ruddy turnstone/DE/1538/2000(H7N9))]	ENSP00000361909|PABPC1L	1	GO:0003723|RNA binding
H7N9|>gi|312126097|gb|ADQ27996.1| polymerase PA [Influenza A virus (A/ruddy turnstone/DE/1538/2000(H7N9))]	ENSP00000361911|PABPC1L	1	GO:0003723|RNA binding
H7N9|>gi|312126097|gb|ADQ27996.1| polymerase PA [Influenza A virus (A/ruddy turnstone/DE/1538/2000(H7N9))]	ENSP00000361913|PABPC1L	1	GO:0003723|RNA binding
H7N9|>gi|312126097|gb|ADQ27996.1| polymerase PA [Influenza A virus (A/ruddy turnstone/DE/1538/2000(H7N9))]	ENSP00000361918|PPIE	1	GO:0003723|RNA binding
H7N9|>gi|312126097|gb|ADQ27996.1| polymerase PA [Influenza A virus (A/ruddy turnstone/DE/1538/2000(H7N9))]	ENSP00000361927|HNRNPH2	1	GO:0003723|RNA binding
H7N9|>gi|312126097|gb|ADQ27996.1| polymerase PA [Influenza A virus (A/ruddy turnstone/DE/1538/2000(H7N9))]	ENSP00000361947|PABPC4	1	GO:0003723|RNA binding
H7N9|>gi|312126097|gb|ADQ27996.1| polymerase PA [Influenza A virus (A/ruddy turnstone/DE/1538/2000(H7N9))]	ENSP00000361948|PABPC4	1	GO:0003723|RNA binding
H7N9|>gi|312126097|gb|ADQ27996.1| polymerase PA [Influenza A virus (A/ruddy turnstone/DE/1538/2000(H7N9))]	ENSP00000361949|PABPC4	1	GO:0003723|RNA binding
H7N9|>gi|312126097|gb|ADQ27996.1| polymerase PA [Influenza A virus (A/ruddy turnstone/DE/1538/2000(H7N9))]	ENSP00000361953|PABPC4	1	GO:0003723|RNA binding
H7N9|>gi|312126097|gb|ADQ27996.1| polymerase PA [Influenza A virus (A/ruddy turnstone/DE/1538/2000(H7N9))]	ENSP00000361982|TRUB2	1	GO:0003723|RNA binding
H7N9|>gi|312126097|gb|ADQ27996.1| polymerase PA [Influenza A virus (A/ruddy turnstone/DE/1538/2000(H7N9))]	ENSP00000362063|CSTF2	1	GO:0003723|RNA binding
H7N9|>gi|312126097|gb|ADQ27996.1| polymerase PA [Influenza A virus (A/ruddy turnstone/DE/1538/2000(H7N9))]	ENSP00000362193|ASCC1	1	GO:0003723|RNA binding
H7N9|>gi|312126097|gb|ADQ27996.1| polymerase PA [Influenza A virus (A/ruddy turnstone/DE/1538/2000(H7N9))]	ENSP00000362287|EIF2C3	1	GO:0003723|RNA binding
H7N9|>gi|312126097|gb|ADQ27996.1| polymerase PA [Influenza A virus (A/ruddy turnstone/DE/1538/2000(H7N9))]	ENSP00000362300|EIF2C1	1	GO:0003723|RNA binding
H7N9|>gi|312126097|gb|ADQ27996.1| polymerase PA [Influenza A virus (A/ruddy turnstone/DE/1538/2000(H7N9))]	ENSP00000362306|EIF2C4	1	GO:0003723|RNA binding
H7N9|>gi|312126097|gb|ADQ27996.1| polymerase PA [Influenza A virus (A/ruddy turnstone/DE/1538/2000(H7N9))]	ENSP00000362389|HDLBP	1	GO:0003723|RNA binding
H7N9|>gi|312126097|gb|ADQ27996.1| polymerase PA [Influenza A virus (A/ruddy turnstone/DE/1538/2000(H7N9))]	ENSP00000362618|PABPC1L2A	1	GO:0003723|RNA binding
H7N9|>gi|312126097|gb|ADQ27996.1| polymerase PA [Influenza A virus (A/ruddy turnstone/DE/1538/2000(H7N9))]	ENSP00000362621|PABPC1L2B	1	GO:0003723|RNA binding
H7N9|>gi|312126097|gb|ADQ27996.1| polymerase PA [Influenza A virus (A/ruddy turnstone/DE/1538/2000(H7N9))]	ENSP00000362687|DDX50	1	GO:0003723|RNA binding
H7N9|>gi|312126097|gb|ADQ27996.1| polymerase PA [Influenza A virus (A/ruddy turnstone/DE/1538/2000(H7N9))]	ENSP00000362729|RPS4X	1	GO:0003723|RNA binding
H7N9|>gi|312126097|gb|ADQ27996.1| polymerase PA [Influenza A virus (A/ruddy turnstone/DE/1538/2000(H7N9))]	ENSP00000362744|RPS4X	1	GO:0003723|RNA binding
H7N9|>gi|312126097|gb|ADQ27996.1| polymerase PA [Influenza A virus (A/ruddy turnstone/DE/1538/2000(H7N9))]	ENSP00000362775|AGFG1	1	GO:0003723|RNA binding
H7N9|>gi|312126097|gb|ADQ27996.1| polymerase PA [Influenza A virus (A/ruddy turnstone/DE/1538/2000(H7N9))]	ENSP00000362819|ZCCHC17	1	GO:0003723|RNA binding
H7N9|>gi|312126097|gb|ADQ27996.1| polymerase PA [Influenza A virus (A/ruddy turnstone/DE/1538/2000(H7N9))]	ENSP00000362820|SRSF3	1	GO:0003723|RNA binding
H7N9|>gi|312126097|gb|ADQ27996.1| polymerase PA [Influenza A virus (A/ruddy turnstone/DE/1538/2000(H7N9))]	ENSP00000362846|PUM1	1	GO:0003723|RNA binding
H7N9|>gi|312126097|gb|ADQ27996.1| polymerase PA [Influenza A virus (A/ruddy turnstone/DE/1538/2000(H7N9))]	ENSP00000362847|PUM1	1	GO:0003723|RNA binding
H7N9|>gi|312126097|gb|ADQ27996.1| polymerase PA [Influenza A virus (A/ruddy turnstone/DE/1538/2000(H7N9))]	ENSP00000362852|PUM1	1	GO:0003723|RNA binding
H7N9|>gi|312126097|gb|ADQ27996.1| polymerase PA [Influenza A virus (A/ruddy turnstone/DE/1538/2000(H7N9))]	ENSP00000362900|SRSF4	1	GO:0003723|RNA binding
H7N9|>gi|312126097|gb|ADQ27996.1| polymerase PA [Influenza A virus (A/ruddy turnstone/DE/1538/2000(H7N9))]	ENSP00000362936|TRNAU1AP	1	GO:0003723|RNA binding
H7N9|>gi|312126097|gb|ADQ27996.1| polymerase PA [Influenza A virus (A/ruddy turnstone/DE/1538/2000(H7N9))]	ENSP00000362947|NONO	1	GO:0003723|RNA binding
H7N9|>gi|312126097|gb|ADQ27996.1| polymerase PA [Influenza A virus (A/ruddy turnstone/DE/1538/2000(H7N9))]	ENSP00000362963|NONO	1	GO:0003723|RNA binding
H7N9|>gi|312126097|gb|ADQ27996.1| polymerase PA [Influenza A virus (A/ruddy turnstone/DE/1538/2000(H7N9))]	ENSP00000362993|BICC1	1	GO:0003723|RNA binding
H7N9|>gi|312126097|gb|ADQ27996.1| polymerase PA [Influenza A virus (A/ruddy turnstone/DE/1538/2000(H7N9))]	ENSP00000363018|RPL10A	1	GO:0003723|RNA binding
H7N9|>gi|312126097|gb|ADQ27996.1| polymerase PA [Influenza A virus (A/ruddy turnstone/DE/1538/2000(H7N9))]	ENSP00000363042|PPP1R8	1	GO:0003723|RNA binding
H7N9|>gi|312126097|gb|ADQ27996.1| polymerase PA [Influenza A virus (A/ruddy turnstone/DE/1538/2000(H7N9))]	ENSP00000363095|TRIM32	1	GO:0003723|RNA binding
H7N9|>gi|312126097|gb|ADQ27996.1| polymerase PA [Influenza A virus (A/ruddy turnstone/DE/1538/2000(H7N9))]	ENSP00000363105|A1CF	1	GO:0003723|RNA binding
H7N9|>gi|312126097|gb|ADQ27996.1| polymerase PA [Influenza A virus (A/ruddy turnstone/DE/1538/2000(H7N9))]	ENSP00000363107|A1CF	1	GO:0003723|RNA binding
H7N9|>gi|312126097|gb|ADQ27996.1| polymerase PA [Influenza A virus (A/ruddy turnstone/DE/1538/2000(H7N9))]	ENSP00000363109|A1CF	1	GO:0003723|RNA binding
H7N9|>gi|312126097|gb|ADQ27996.1| polymerase PA [Influenza A virus (A/ruddy turnstone/DE/1538/2000(H7N9))]	ENSP00000363113|A1CF	1	GO:0003723|RNA binding
H7N9|>gi|312126097|gb|ADQ27996.1| polymerase PA [Influenza A virus (A/ruddy turnstone/DE/1538/2000(H7N9))]	ENSP00000363150|RBM39	1	GO:0003723|RNA binding
H7N9|>gi|312126097|gb|ADQ27996.1| polymerase PA [Influenza A virus (A/ruddy turnstone/DE/1538/2000(H7N9))]	ENSP00000363217|RBM12	1	GO:0003723|RNA binding
H7N9|>gi|312126097|gb|ADQ27996.1| polymerase PA [Influenza A virus (A/ruddy turnstone/DE/1538/2000(H7N9))]	ENSP00000363228|RBM12	1	GO:0003723|RNA binding
H7N9|>gi|312126097|gb|ADQ27996.1| polymerase PA [Influenza A virus (A/ruddy turnstone/DE/1538/2000(H7N9))]	ENSP00000363314|LIN28A	1	GO:0003723|RNA binding
H7N9|>gi|312126097|gb|ADQ27996.1| polymerase PA [Influenza A virus (A/ruddy turnstone/DE/1538/2000(H7N9))]	ENSP00000363373|PTBP3	1	GO:0003723|RNA binding
H7N9|>gi|312126097|gb|ADQ27996.1| polymerase PA [Influenza A virus (A/ruddy turnstone/DE/1538/2000(H7N9))]	ENSP00000363375|PTBP3	1	GO:0003723|RNA binding
H7N9|>gi|312126097|gb|ADQ27996.1| polymerase PA [Influenza A virus (A/ruddy turnstone/DE/1538/2000(H7N9))]	ENSP00000363516|RCAN3	1	GO:0003723|RNA binding
H7N9|>gi|312126097|gb|ADQ27996.1| polymerase PA [Influenza A virus (A/ruddy turnstone/DE/1538/2000(H7N9))]	ENSP00000363569|ZNF239	1	GO:0003723|RNA binding
H7N9|>gi|312126097|gb|ADQ27996.1| polymerase PA [Influenza A virus (A/ruddy turnstone/DE/1538/2000(H7N9))]	ENSP00000363573|BX511012.1	1	GO:0003723|RNA binding
H7N9|>gi|312126097|gb|ADQ27996.1| polymerase PA [Influenza A virus (A/ruddy turnstone/DE/1538/2000(H7N9))]	ENSP00000363576|SRSF10	1	GO:0003723|RNA binding
H7N9|>gi|312126097|gb|ADQ27996.1| polymerase PA [Influenza A virus (A/ruddy turnstone/DE/1538/2000(H7N9))]	ENSP00000363676|RPL11	1	GO:0003723|RNA binding
H7N9|>gi|312126097|gb|ADQ27996.1| polymerase PA [Influenza A virus (A/ruddy turnstone/DE/1538/2000(H7N9))]	ENSP00000363741|HNRNPR	1	GO:0003723|RNA binding
H7N9|>gi|312126097|gb|ADQ27996.1| polymerase PA [Influenza A virus (A/ruddy turnstone/DE/1538/2000(H7N9))]	ENSP00000363745|HNRNPR	1	GO:0003723|RNA binding
H7N9|>gi|312126097|gb|ADQ27996.1| polymerase PA [Influenza A virus (A/ruddy turnstone/DE/1538/2000(H7N9))]	ENSP00000364071|EIF4G3	1	GO:0003723|RNA binding
H7N9|>gi|312126097|gb|ADQ27996.1| polymerase PA [Influenza A virus (A/ruddy turnstone/DE/1538/2000(H7N9))]	ENSP00000364073|EIF4G3	1	GO:0003723|RNA binding
H7N9|>gi|312126097|gb|ADQ27996.1| polymerase PA [Influenza A virus (A/ruddy turnstone/DE/1538/2000(H7N9))]	ENSP00000364119|EIF2S2	1	GO:0003723|RNA binding
H7N9|>gi|312126097|gb|ADQ27996.1| polymerase PA [Influenza A virus (A/ruddy turnstone/DE/1538/2000(H7N9))]	ENSP00000364255|RALY	1	GO:0003723|RNA binding
H7N9|>gi|312126097|gb|ADQ27996.1| polymerase PA [Influenza A virus (A/ruddy turnstone/DE/1538/2000(H7N9))]	ENSP00000364272|NCBP1	1	GO:0003723|RNA binding
H7N9|>gi|312126097|gb|ADQ27996.1| polymerase PA [Influenza A virus (A/ruddy turnstone/DE/1538/2000(H7N9))]	ENSP00000364289|NCBP1	1	GO:0003723|RNA binding
H7N9|>gi|312126097|gb|ADQ27996.1| polymerase PA [Influenza A virus (A/ruddy turnstone/DE/1538/2000(H7N9))]	ENSP00000364448|UPF3A	1	GO:0003723|RNA binding
H7N9|>gi|312126097|gb|ADQ27996.1| polymerase PA [Influenza A virus (A/ruddy turnstone/DE/1538/2000(H7N9))]	ENSP00000364538|FAM120A	1	GO:0003723|RNA binding
H7N9|>gi|312126097|gb|ADQ27996.1| polymerase PA [Influenza A virus (A/ruddy turnstone/DE/1538/2000(H7N9))]	ENSP00000364543|SKIV2L	1	GO:0003723|RNA binding
H7N9|>gi|312126097|gb|ADQ27996.1| polymerase PA [Influenza A virus (A/ruddy turnstone/DE/1538/2000(H7N9))]	ENSP00000364574|RDBP	1	GO:0003723|RNA binding
H7N9|>gi|312126097|gb|ADQ27996.1| polymerase PA [Influenza A virus (A/ruddy turnstone/DE/1538/2000(H7N9))]	ENSP00000364578|RDBP	1	GO:0003723|RNA binding
H7N9|>gi|312126097|gb|ADQ27996.1| polymerase PA [Influenza A virus (A/ruddy turnstone/DE/1538/2000(H7N9))]	ENSP00000364639|RBM7	1	GO:0003723|RNA binding
H7N9|>gi|312126097|gb|ADQ27996.1| polymerase PA [Influenza A virus (A/ruddy turnstone/DE/1538/2000(H7N9))]	ENSP00000364883|AUH	1	GO:0003723|RNA binding
H7N9|>gi|312126097|gb|ADQ27996.1| polymerase PA [Influenza A virus (A/ruddy turnstone/DE/1538/2000(H7N9))]	ENSP00000364912|SPEN	1	GO:0003723|RNA binding
H7N9|>gi|312126097|gb|ADQ27996.1| polymerase PA [Influenza A virus (A/ruddy turnstone/DE/1538/2000(H7N9))]	ENSP00000365370|HNRNPCL1	1	GO:0003723|RNA binding
H7N9|>gi|312126097|gb|ADQ27996.1| polymerase PA [Influenza A virus (A/ruddy turnstone/DE/1538/2000(H7N9))]	ENSP00000365432|HNRNPK	1	GO:0003723|RNA binding
H7N9|>gi|312126097|gb|ADQ27996.1| polymerase PA [Influenza A virus (A/ruddy turnstone/DE/1538/2000(H7N9))]	ENSP00000365439|HNRNPK	1	GO:0003723|RNA binding
H7N9|>gi|312126097|gb|ADQ27996.1| polymerase PA [Influenza A virus (A/ruddy turnstone/DE/1538/2000(H7N9))]	ENSP00000365440|HNRNPK	1	GO:0003723|RNA binding
[truncated: 7,314 more rows]

## Sheet: HRV-Human Protein pairs
HRV virus proteins	Human proteins|Genes	Number of sharing GO terms	Sharing GO terms
HRV|gi|333980908|gb|AEG42385.1|	ENSP00000261303|PSMC1	5	GO:0006508|proteolysis; GO:0016032|viral reproduction; GO:0000166|nucleotide binding; GO:0017111|nucleoside-triphosphatase activity; GO:0008233|peptidase activity
HRV|gi|333980908|gb|AEG42385.1|	ENSP00000292644|PSMC2	5	GO:0006508|proteolysis; GO:0016032|viral reproduction; GO:0000166|nucleotide binding; GO:0017111|nucleoside-triphosphatase activity; GO:0008233|peptidase activity
HRV|gi|333980908|gb|AEG42385.1|	ENSP00000310572|PSMC5	5	GO:0006508|proteolysis; GO:0016032|viral reproduction; GO:0000166|nucleotide binding; GO:0017111|nucleoside-triphosphatase activity; GO:0008233|peptidase activity
HRV|gi|333980908|gb|AEG42385.1|	ENSP00000391211|PSMC2	5	GO:0006508|proteolysis; GO:0016032|viral reproduction; GO:0000166|nucleotide binding; GO:0017111|nucleoside-triphosphatase activity; GO:0008233|peptidase activity
HRV|gi|355429265|gb|AER92564.1|	ENSP00000261303|PSMC1	5	GO:0006508|proteolysis; GO:0016032|viral reproduction; GO:0000166|nucleotide binding; GO:0017111|nucleoside-triphosphatase activity; GO:0008233|peptidase activity
HRV|gi|355429265|gb|AER92564.1|	ENSP00000292644|PSMC2	5	GO:0006508|proteolysis; GO:0016032|viral reproduction; GO:0000166|nucleotide binding; GO:0017111|nucleoside-triphosphatase activity; GO:0008233|peptidase activity
HRV|gi|355429265|gb|AER92564.1|	ENSP00000310572|PSMC5	5	GO:0006508|proteolysis; GO:0016032|viral reproduction; GO:0000166|nucleotide binding; GO:0017111|nucleoside-triphosphatase activity; GO:0008233|peptidase activity
HRV|gi|355429265|gb|AER92564.1|	ENSP00000391211|PSMC2	5	GO:0006508|proteolysis; GO:0016032|viral reproduction; GO:0000166|nucleotide binding; GO:0017111|nucleoside-triphosphatase activity; GO:0008233|peptidase activity
HRV|gi|61083|emb|CAA25565.1|	ENSP00000261303|PSMC1	5	GO:0006508|proteolysis; GO:0016032|viral reproduction; GO:0000166|nucleotide binding; GO:0017111|nucleoside-triphosphatase activity; GO:0008233|peptidase activity
HRV|gi|61083|emb|CAA25565.1|	ENSP00000292644|PSMC2	5	GO:0006508|proteolysis; GO:0016032|viral reproduction; GO:0000166|nucleotide binding; GO:0017111|nucleoside-triphosphatase activity; GO:0008233|peptidase activity
HRV|gi|61083|emb|CAA25565.1|	ENSP00000310572|PSMC5	5	GO:0006508|proteolysis; GO:0016032|viral reproduction; GO:0000166|nucleotide binding; GO:0017111|nucleoside-triphosphatase activity; GO:0008233|peptidase activity
HRV|gi|61083|emb|CAA25565.1|	ENSP00000391211|PSMC2	5	GO:0006508|proteolysis; GO:0016032|viral reproduction; GO:0000166|nucleotide binding; GO:0017111|nucleoside-triphosphatase activity; GO:0008233|peptidase activity
HRV|gi|333980908|gb|AEG42385.1|	ENSP00000157812|PSMC4	4	GO:0006508|proteolysis; GO:0016032|viral reproduction; GO:0000166|nucleotide binding; GO:0017111|nucleoside-triphosphatase activity
HRV|gi|333980908|gb|AEG42385.1|	ENSP00000220166|CTSH	4	GO:0006508|proteolysis; GO:0008234|cysteine-type peptidase activity; GO:0004197|cysteine-type endopeptidase activity; GO:0008233|peptidase activity
HRV|gi|333980908|gb|AEG42385.1|	ENSP00000255256|CASP9	4	GO:0006508|proteolysis; GO:0008234|cysteine-type peptidase activity; GO:0004197|cysteine-type endopeptidase activity; GO:0008233|peptidase activity
HRV|gi|333980908|gb|AEG42385.1|	ENSP00000259782|TINAG	4	GO:0006508|proteolysis; GO:0000166|nucleotide binding; GO:0008234|cysteine-type peptidase activity; GO:0004197|cysteine-type endopeptidase activity
HRV|gi|333980908|gb|AEG42385.1|	ENSP00000268704|SPG7	4	GO:0006508|proteolysis; GO:0000166|nucleotide binding; GO:0017111|nucleoside-triphosphatase activity; GO:0008233|peptidase activity
HRV|gi|333980908|gb|AEG42385.1|	ENSP00000285737|LONP2	4	GO:0006508|proteolysis; GO:0000166|nucleotide binding; GO:0017111|nucleoside-triphosphatase activity; GO:0008233|peptidase activity
HRV|gi|333980908|gb|AEG42385.1|	ENSP00000311032|CASP3	4	GO:0006508|proteolysis; GO:0008234|cysteine-type peptidase activity; GO:0004197|cysteine-type endopeptidase activity; GO:0008233|peptidase activity
HRV|gi|333980908|gb|AEG42385.1|	ENSP00000322159|ATG4C	4	GO:0006508|proteolysis; GO:0008234|cysteine-type peptidase activity; GO:0004197|cysteine-type endopeptidase activity; GO:0008233|peptidase activity
HRV|gi|333980908|gb|AEG42385.1|	ENSP00000330237|CASP9	4	GO:0006508|proteolysis; GO:0008234|cysteine-type peptidase activity; GO:0004197|cysteine-type endopeptidase activity; GO:0008233|peptidase activity
HRV|gi|333980908|gb|AEG42385.1|	ENSP00000341157|SPG7	4	GO:0006508|proteolysis; GO:0000166|nucleotide binding; GO:0017111|nucleoside-triphosphatase activity; GO:0008233|peptidase activity
HRV|gi|333980908|gb|AEG42385.1|	ENSP00000342070|CTSB	4	GO:0006508|proteolysis; GO:0008234|cysteine-type peptidase activity; GO:0004197|cysteine-type endopeptidase activity; GO:0008233|peptidase activity
HRV|gi|333980908|gb|AEG42385.1|	ENSP00000345672|CTSB	4	GO:0006508|proteolysis; GO:0008234|cysteine-type peptidase activity; GO:0004197|cysteine-type endopeptidase activity; GO:0008233|peptidase activity
HRV|gi|333980908|gb|AEG42385.1|	ENSP00000351273|CASP8	4	GO:0006508|proteolysis; GO:0008234|cysteine-type peptidase activity; GO:0004197|cysteine-type endopeptidase activity; GO:0008233|peptidase activity
HRV|gi|333980908|gb|AEG42385.1|	ENSP00000357981|CTSS	4	GO:0006508|proteolysis; GO:0008234|cysteine-type peptidase activity; GO:0004197|cysteine-type endopeptidase activity; GO:0008233|peptidase activity
HRV|gi|333980908|gb|AEG42385.1|	ENSP00000358324|CASP7	4	GO:0006508|proteolysis; GO:0008234|cysteine-type peptidase activity; GO:0004197|cysteine-type endopeptidase activity; GO:0008233|peptidase activity
HRV|gi|333980908|gb|AEG42385.1|	ENSP00000360161|ATG4C	4	GO:0006508|proteolysis; GO:0008234|cysteine-type peptidase activity; GO:0004197|cysteine-type endopeptidase activity; GO:0008233|peptidase activity
HRV|gi|333980908|gb|AEG42385.1|	ENSP00000364970|PSMC5	4	GO:0006508|proteolysis; GO:0000166|nucleotide binding; GO:0017111|nucleoside-triphosphatase activity; GO:0008233|peptidase activity
HRV|gi|333980908|gb|AEG42385.1|	ENSP00000377213|CASP3	4	GO:0006508|proteolysis; GO:0008234|cysteine-type peptidase activity; GO:0004197|cysteine-type endopeptidase activity; GO:0008233|peptidase activity
HRV|gi|333980908|gb|AEG42385.1|	ENSP00000389402|BCS1L	4	GO:0000166|nucleotide binding; GO:0003723|RNA binding; GO:0017111|nucleoside-triphosphatase activity; GO:0003724|RNA helicase activity
HRV|gi|333980908|gb|AEG42385.1|	ENSP00000409917|CTSB	4	GO:0006508|proteolysis; GO:0008234|cysteine-type peptidase activity; GO:0004197|cysteine-type endopeptidase activity; GO:0008233|peptidase activity
HRV|gi|333980908|gb|AEG42385.1|	ENSP00000413869|PSMC4	4	GO:0006508|proteolysis; GO:0016032|viral reproduction; GO:0000166|nucleotide binding; GO:0017111|nucleoside-triphosphatase activity
HRV|gi|333980908|gb|AEG42385.1|	ENSP00000415889|CTSB	4	GO:0006508|proteolysis; GO:0008234|cysteine-type peptidase activity; GO:0004197|cysteine-type endopeptidase activity; GO:0008233|peptidase activity
HRV|gi|333980908|gb|AEG42385.1|	ENSP00000428929|CASP3	4	GO:0006508|proteolysis; GO:0008234|cysteine-type peptidase activity; GO:0004197|cysteine-type endopeptidase activity; GO:0008233|peptidase activity
HRV|gi|333980908|gb|AEG42385.1|	ENSP00000432244|CTSB	4	GO:0006508|proteolysis; GO:0008234|cysteine-type peptidase activity; GO:0004197|cysteine-type endopeptidase activity; GO:0008233|peptidase activity
HRV|gi|333980908|gb|AEG42385.1|	ENSP00000433138|CASP1	4	GO:0006508|proteolysis; GO:0008234|cysteine-type peptidase activity; GO:0004197|cysteine-type endopeptidase activity; GO:0008233|peptidase activity
HRV|gi|333980908|gb|AEG42385.1|	ENSP00000433215|CTSB	4	GO:0006508|proteolysis; GO:0008234|cysteine-type peptidase activity; GO:0004197|cysteine-type endopeptidase activity; GO:0008233|peptidase activity
HRV|gi|333980908|gb|AEG42385.1|	ENSP00000434217|CTSB	4	GO:0006508|proteolysis; GO:0008234|cysteine-type peptidase activity; GO:0004197|cysteine-type endopeptidase activity; GO:0008233|peptidase activity
HRV|gi|333980908|gb|AEG42385.1|	ENSP00000435105|CTSB	4	GO:0006508|proteolysis; GO:0008234|cysteine-type peptidase activity; GO:0004197|cysteine-type endopeptidase activity; GO:0008233|peptidase activity
HRV|gi|333980908|gb|AEG42385.1|	ENSP00000445147|PSMC1	4	GO:0006508|proteolysis; GO:0000166|nucleotide binding; GO:0017111|nucleoside-triphosphatase activity; GO:0008233|peptidase activity
HRV|gi|333980908|gb|AEG42385.1|	ENSP00000445546|PSMC2	4	GO:0006508|proteolysis; GO:0000166|nucleotide binding; GO:0017111|nucleoside-triphosphatase activity; GO:0008233|peptidase activity
HRV|gi|333980908|gb|AEG42385.1|	ENSP00000462495|PSMC5	4	GO:0006508|proteolysis; GO:0000166|nucleotide binding; GO:0017111|nucleoside-triphosphatase activity; GO:0008233|peptidase activity
HRV|gi|333980908|gb|AEG42385.1|	ENSP00000463938|PSMC5	4	GO:0006508|proteolysis; GO:0000166|nucleotide binding; GO:0017111|nucleoside-triphosphatase activity; GO:0008233|peptidase activity
HRV|gi|355429265|gb|AER92564.1|	ENSP00000157812|PSMC4	4	GO:0006508|proteolysis; GO:0016032|viral reproduction; GO:0000166|nucleotide binding; GO:0017111|nucleoside-triphosphatase activity
HRV|gi|355429265|gb|AER92564.1|	ENSP00000220166|CTSH	4	GO:0006508|proteolysis; GO:0008234|cysteine-type peptidase activity; GO:0004197|cysteine-type endopeptidase activity; GO:0008233|peptidase activity
HRV|gi|355429265|gb|AER92564.1|	ENSP00000255256|CASP9	4	GO:0006508|proteolysis; GO:0008234|cysteine-type peptidase activity; GO:0004197|cysteine-type endopeptidase activity; GO:0008233|peptidase activity
HRV|gi|355429265|gb|AER92564.1|	ENSP00000259782|TINAG	4	GO:0006508|proteolysis; GO:0000166|nucleotide binding; GO:0008234|cysteine-type peptidase activity; GO:0004197|cysteine-type endopeptidase activity
HRV|gi|355429265|gb|AER92564.1|	ENSP00000268704|SPG7	4	GO:0006508|proteolysis; GO:0000166|nucleotide binding; GO:0017111|nucleoside-triphosphatase activity; GO:0008233|peptidase activity
HRV|gi|355429265|gb|AER92564.1|	ENSP00000285737|LONP2	4	GO:0006508|proteolysis; GO:0000166|nucleotide binding; GO:0017111|nucleoside-triphosphatase activity; GO:0008233|peptidase activity
HRV|gi|355429265|gb|AER92564.1|	ENSP00000311032|CASP3	4	GO:0006508|proteolysis; GO:0008234|cysteine-type peptidase activity; GO:0004197|cysteine-type endopeptidase activity; GO:0008233|peptidase activity
HRV|gi|355429265|gb|AER92564.1|	ENSP00000322159|ATG4C	4	GO:0006508|proteolysis; GO:0008234|cysteine-type peptidase activity; GO:0004197|cysteine-type endopeptidase activity; GO:0008233|peptidase activity
HRV|gi|355429265|gb|AER92564.1|	ENSP00000330237|CASP9	4	GO:0006508|proteolysis; GO:0008234|cysteine-type peptidase activity; GO:0004197|cysteine-type endopeptidase activity; GO:0008233|peptidase activity
HRV|gi|355429265|gb|AER92564.1|	ENSP00000341157|SPG7	4	GO:0006508|proteolysis; GO:0000166|nucleotide binding; GO:0017111|nucleoside-triphosphatase activity; GO:0008233|peptidase activity
HRV|gi|355429265|gb|AER92564.1|	ENSP00000342070|CTSB	4	GO:0006508|proteolysis; GO:0008234|cysteine-type peptidase activity; GO:0004197|cysteine-type endopeptidase activity; GO:0008233|peptidase activity
HRV|gi|355429265|gb|AER92564.1|	ENSP00000345672|CTSB	4	GO:0006508|proteolysis; GO:0008234|cysteine-type peptidase activity; GO:0004197|cysteine-type endopeptidase activity; GO:0008233|peptidase activity
HRV|gi|355429265|gb|AER92564.1|	ENSP00000351273|CASP8	4	GO:0006508|proteolysis; GO:0008234|cysteine-type peptidase activity; GO:0004197|cysteine-type endopeptidase activity; GO:0008233|peptidase activity
HRV|gi|355429265|gb|AER92564.1|	ENSP00000357981|CTSS	4	GO:0006508|proteolysis; GO:0008234|cysteine-type peptidase activity; GO:0004197|cysteine-type endopeptidase activity; GO:0008233|peptidase activity
HRV|gi|355429265|gb|AER92564.1|	ENSP00000358324|CASP7	4	GO:0006508|proteolysis; GO:0008234|cysteine-type peptidase activity; GO:0004197|cysteine-type endopeptidase activity; GO:0008233|peptidase activity
HRV|gi|355429265|gb|AER92564.1|	ENSP00000360161|ATG4C	4	GO:0006508|proteolysis; GO:0008234|cysteine-type peptidase activity; GO:0004197|cysteine-type endopeptidase activity; GO:0008233|peptidase activity
HRV|gi|355429265|gb|AER92564.1|	ENSP00000364970|PSMC5	4	GO:0006508|proteolysis; GO:0000166|nucleotide binding; GO:0017111|nucleoside-triphosphatase activity; GO:0008233|peptidase activity
HRV|gi|355429265|gb|AER92564.1|	ENSP00000377213|CASP3	4	GO:0006508|proteolysis; GO:0008234|cysteine-type peptidase activity; GO:0004197|cysteine-type endopeptidase activity; GO:0008233|peptidase activity
HRV|gi|355429265|gb|AER92564.1|	ENSP00000389402|BCS1L	4	GO:0000166|nucleotide binding; GO:0003723|RNA binding; GO:0017111|nucleoside-triphosphatase activity; GO:0003724|RNA helicase activity
HRV|gi|355429265|gb|AER92564.1|	ENSP00000409917|CTSB	4	GO:0006508|proteolysis; GO:0008234|cysteine-type peptidase activity; GO:0004197|cysteine-type endopeptidase activity; GO:0008233|peptidase activity
HRV|gi|355429265|gb|AER92564.1|	ENSP00000413869|PSMC4	4	GO:0006508|proteolysis; GO:0016032|viral reproduction; GO:0000166|nucleotide binding; GO:0017111|nucleoside-triphosphatase activity
HRV|gi|355429265|gb|AER92564.1|	ENSP00000415889|CTSB	4	GO:0006508|proteolysis; GO:0008234|cysteine-type peptidase activity; GO:0004197|cysteine-type endopeptidase activity; GO:0008233|peptidase activity
HRV|gi|355429265|gb|AER92564.1|	ENSP00000428929|CASP3	4	GO:0006508|proteolysis; GO:0008234|cysteine-type peptidase activity; GO:0004197|cysteine-type endopeptidase activity; GO:0008233|peptidase activity
HRV|gi|355429265|gb|AER92564.1|	ENSP00000432244|CTSB	4	GO:0006508|proteolysis; GO:0008234|cysteine-type peptidase activity; GO:0004197|cysteine-type endopeptidase activity; GO:0008233|peptidase activity
HRV|gi|355429265|gb|AER92564.1|	ENSP00000433138|CASP1	4	GO:0006508|proteolysis; GO:0008234|cysteine-type peptidase activity; GO:0004197|cysteine-type endopeptidase activity; GO:0008233|peptidase activity
HRV|gi|355429265|gb|AER92564.1|	ENSP00000433215|CTSB	4	GO:0006508|proteolysis; GO:0008234|cysteine-type peptidase activity; GO:0004197|cysteine-type endopeptidase activity; GO:0008233|peptidase activity
HRV|gi|355429265|gb|AER92564.1|	ENSP00000434217|CTSB	4	GO:0006508|proteolysis; GO:0008234|cysteine-type peptidase activity; GO:0004197|cysteine-type endopeptidase activity; GO:0008233|peptidase activity
HRV|gi|355429265|gb|AER92564.1|	ENSP00000435105|CTSB	4	GO:0006508|proteolysis; GO:0008234|cysteine-type peptidase activity; GO:0004197|cysteine-type endopeptidase activity; GO:0008233|peptidase activity
HRV|gi|355429265|gb|AER92564.1|	ENSP00000445147|PSMC1	4	GO:0006508|proteolysis; GO:0000166|nucleotide binding; GO:0017111|nucleoside-triphosphatase activity; GO:0008233|peptidase activity
HRV|gi|355429265|gb|AER92564.1|	ENSP00000445546|PSMC2	4	GO:0006508|proteolysis; GO:0000166|nucleotide binding; GO:0017111|nucleoside-triphosphatase activity; GO:0008233|peptidase activity
HRV|gi|355429265|gb|AER92564.1|	ENSP00000462495|PSMC5	4	GO:0006508|proteolysis; GO:0000166|nucleotide binding; GO:0017111|nucleoside-triphosphatase activity; GO:0008233|peptidase activity
HRV|gi|355429265|gb|AER92564.1|	ENSP00000463938|PSMC5	4	GO:0006508|proteolysis; GO:0000166|nucleotide binding; GO:0017111|nucleoside-triphosphatase activity; GO:0008233|peptidase activity
HRV|gi|61083|emb|CAA25565.1|	ENSP00000157812|PSMC4	4	GO:0006508|proteolysis; GO:0016032|viral reproduction; GO:0000166|nucleotide binding; GO:0017111|nucleoside-triphosphatase activity
HRV|gi|61083|emb|CAA25565.1|	ENSP00000220166|CTSH	4	GO:0006508|proteolysis; GO:0008234|cysteine-type peptidase activity; GO:0004197|cysteine-type endopeptidase activity; GO:0008233|peptidase activity
HRV|gi|61083|emb|CAA25565.1|	ENSP00000255256|CASP9	4	GO:0006508|proteolysis; GO:0008234|cysteine-type peptidase activity; GO:0004197|cysteine-type endopeptidase activity; GO:0008233|peptidase activity
HRV|gi|61083|emb|CAA25565.1|	ENSP00000259782|TINAG	4	GO:0006508|proteolysis; GO:0000166|nucleotide binding; GO:0008234|cysteine-type peptidase activity; GO:0004197|cysteine-type endopeptidase activity
HRV|gi|61083|emb|CAA25565.1|	ENSP00000268704|SPG7	4	GO:0006508|proteolysis; GO:0000166|nucleotide binding; GO:0017111|nucleoside-triphosphatase activity; GO:0008233|peptidase activity
HRV|gi|61083|emb|CAA25565.1|	ENSP00000285737|LONP2	4	GO:0006508|proteolysis; GO:0000166|nucleotide binding; GO:0017111|nucleoside-triphosphatase activity; GO:0008233|peptidase activity
HRV|gi|61083|emb|CAA25565.1|	ENSP00000311032|CASP3	4	GO:0006508|proteolysis; GO:0008234|cysteine-type peptidase activity; GO:0004197|cysteine-type endopeptidase activity; GO:0008233|peptidase activity
HRV|gi|61083|emb|CAA25565.1|	ENSP00000322159|ATG4C	4	GO:0006508|proteolysis; GO:0008234|cysteine-type peptidase activity; GO:0004197|cysteine-type endopeptidase activity; GO:0008233|peptidase activity
HRV|gi|61083|emb|CAA25565.1|	ENSP00000330237|CASP9	4	GO:0006508|proteolysis; GO:0008234|cysteine-type peptidase activity; GO:0004197|cysteine-type endopeptidase activity; GO:0008233|peptidase activity
HRV|gi|61083|emb|CAA25565.1|	ENSP00000341157|SPG7	4	GO:0006508|proteolysis; GO:0000166|nucleotide binding; GO:0017111|nucleoside-triphosphatase activity; GO:0008233|peptidase activity
HRV|gi|61083|emb|CAA25565.1|	ENSP00000342070|CTSB	4	GO:0006508|proteolysis; GO:0008234|cysteine-type peptidase activity; GO:0004197|cysteine-type endopeptidase activity; GO:0008233|peptidase activity
HRV|gi|61083|emb|CAA25565.1|	ENSP00000345672|CTSB	4	GO:0006508|proteolysis; GO:0008234|cysteine-type peptidase activity; GO:0004197|cysteine-type endopeptidase activity; GO:0008233|peptidase activity
HRV|gi|61083|emb|CAA25565.1|	ENSP00000351273|CASP8	4	GO:0006508|proteolysis; GO:0008234|cysteine-type peptidase activity; GO:0004197|cysteine-type endopeptidase activity; GO:0008233|peptidase activity
HRV|gi|61083|emb|CAA25565.1|	ENSP00000357981|CTSS	4	GO:0006508|proteolysis; GO:0008234|cysteine-type peptidase activity; GO:0004197|cysteine-type endopeptidase activity; GO:0008233|peptidase activity
HRV|gi|61083|emb|CAA25565.1|	ENSP00000358324|CASP7	4	GO:0006508|proteolysis; GO:0008234|cysteine-type peptidase activity; GO:0004197|cysteine-type endopeptidase activity; GO:0008233|peptidase activity
HRV|gi|61083|emb|CAA25565.1|	ENSP00000360161|ATG4C	4	GO:0006508|proteolysis; GO:0008234|cysteine-type peptidase activity; GO:0004197|cysteine-type endopeptidase activity; GO:0008233|peptidase activity
HRV|gi|61083|emb|CAA25565.1|	ENSP00000364970|PSMC5	4	GO:0006508|proteolysis; GO:0000166|nucleotide binding; GO:0017111|nucleoside-triphosphatase activity; GO:0008233|peptidase activity
HRV|gi|61083|emb|CAA25565.1|	ENSP00000377213|CASP3	4	GO:0006508|proteolysis; GO:0008234|cysteine-type peptidase activity; GO:0004197|cysteine-type endopeptidase activity; GO:0008233|peptidase activity
HRV|gi|61083|emb|CAA25565.1|	ENSP00000389402|BCS1L	4	GO:0000166|nucleotide binding; GO:0003723|RNA binding; GO:0017111|nucleoside-triphosphatase activity; GO:0003724|RNA helicase activity
HRV|gi|61083|emb|CAA25565.1|	ENSP00000409917|CTSB	4	GO:0006508|proteolysis; GO:0008234|cysteine-type peptidase activity; GO:0004197|cysteine-type endopeptidase activity; GO:0008233|peptidase activity
HRV|gi|61083|emb|CAA25565.1|	ENSP00000413869|PSMC4	4	GO:0006508|proteolysis; GO:0016032|viral reproduction; GO:0000166|nucleotide binding; GO:0017111|nucleoside-triphosphatase activity
HRV|gi|61083|emb|CAA25565.1|	ENSP00000415889|CTSB	4	GO:0006508|proteolysis; GO:0008234|cysteine-type peptidase activity; GO:0004197|cysteine-type endopeptidase activity; GO:0008233|peptidase activity
HRV|gi|61083|emb|CAA25565.1|	ENSP00000428929|CASP3	4	GO:0006508|proteolysis; GO:0008234|cysteine-type peptidase activity; GO:0004197|cysteine-type endopeptidase activity; GO:0008233|peptidase activity
HRV|gi|61083|emb|CAA25565.1|	ENSP00000432244|CTSB	4	GO:0006508|proteolysis; GO:0008234|cysteine-type peptidase activity; GO:0004197|cysteine-type endopeptidase activity; GO:0008233|peptidase activity
HRV|gi|61083|emb|CAA25565.1|	ENSP00000433138|CASP1	4	GO:0006508|proteolysis; GO:0008234|cysteine-type peptidase activity; GO:0004197|cysteine-type endopeptidase activity; GO:0008233|peptidase activity
HRV|gi|61083|emb|CAA25565.1|	ENSP00000433215|CTSB	4	GO:0006508|proteolysis; GO:0008234|cysteine-type peptidase activity; GO:0004197|cysteine-type endopeptidase activity; GO:0008233|peptidase activity
HRV|gi|61083|emb|CAA25565.1|	ENSP00000434217|CTSB	4	GO:0006508|proteolysis; GO:0008234|cysteine-type peptidase activity; GO:0004197|cysteine-type endopeptidase activity; GO:0008233|peptidase activity
HRV|gi|61083|emb|CAA25565.1|	ENSP00000435105|CTSB	4	GO:0006508|proteolysis; GO:0008234|cysteine-type peptidase activity; GO:0004197|cysteine-type endopeptidase activity; GO:0008233|peptidase activity
HRV|gi|61083|emb|CAA25565.1|	ENSP00000445147|PSMC1	4	GO:0006508|proteolysis; GO:0000166|nucleotide binding; GO:0017111|nucleoside-triphosphatase activity; GO:0008233|peptidase activity
HRV|gi|61083|emb|CAA25565.1|	ENSP00000445546|PSMC2	4	GO:0006508|proteolysis; GO:0000166|nucleotide binding; GO:0017111|nucleoside-triphosphatase activity; GO:0008233|peptidase activity
HRV|gi|61083|emb|CAA25565.1|	ENSP00000462495|PSMC5	4	GO:0006508|proteolysis; GO:0000166|nucleotide binding; GO:0017111|nucleoside-triphosphatase activity; GO:0008233|peptidase activity
HRV|gi|61083|emb|CAA25565.1|	ENSP00000463938|PSMC5	4	GO:0006508|proteolysis; GO:0000166|nucleotide binding; GO:0017111|nucleoside-triphosphatase activity; GO:0008233|peptidase activity
HRV|gi|333980908|gb|AEG42385.1|	ENSP00000183936|CAPN3	3	GO:0006508|proteolysis; GO:0008234|cysteine-type peptidase activity; GO:0008233|peptidase activity
HRV|gi|333980908|gb|AEG42385.1|	ENSP00000218364|HTATSF1	3	GO:0019079|viral genome replication; GO:0000166|nucleotide binding; GO:0003723|RNA binding
HRV|gi|333980908|gb|AEG42385.1|	ENSP00000219611|SOLH	3	GO:0006508|proteolysis; GO:0008234|cysteine-type peptidase activity; GO:0008233|peptidase activity
HRV|gi|333980908|gb|AEG42385.1|	ENSP00000221740|CASP14	3	GO:0006508|proteolysis; GO:0008234|cysteine-type peptidase activity; GO:0004197|cysteine-type endopeptidase activity
HRV|gi|333980908|gb|AEG42385.1|	ENSP00000237865|CASP10	3	GO:0006508|proteolysis; GO:0008234|cysteine-type peptidase activity; GO:0004197|cysteine-type endopeptidase activity
HRV|gi|333980908|gb|AEG42385.1|	ENSP00000250066|USP6	3	GO:0006508|proteolysis; GO:0004197|cysteine-type endopeptidase activity; GO:0008233|peptidase activity
HRV|gi|333980908|gb|AEG42385.1|	ENSP00000255078|IGHMBP2	3	GO:0000166|nucleotide binding; GO:0003723|RNA binding; GO:0017111|nucleoside-triphosphatase activity
HRV|gi|333980908|gb|AEG42385.1|	ENSP00000257934|ESPL1	3	GO:0006508|proteolysis; GO:0008234|cysteine-type peptidase activity; GO:0008233|peptidase activity
HRV|gi|333980908|gb|AEG42385.1|	ENSP00000259470|CTSL2	3	GO:0006508|proteolysis; GO:0008234|cysteine-type peptidase activity; GO:0004197|cysteine-type endopeptidase activity
HRV|gi|333980908|gb|AEG42385.1|	ENSP00000260315|CASP5	3	GO:0006508|proteolysis; GO:0008234|cysteine-type peptidase activity; GO:0004197|cysteine-type endopeptidase activity
HRV|gi|333980908|gb|AEG42385.1|	ENSP00000261714|BLMH	3	GO:0006508|proteolysis; GO:0008234|cysteine-type peptidase activity; GO:0004197|cysteine-type endopeptidase activity
HRV|gi|333980908|gb|AEG42385.1|	ENSP00000264274|CASP8	3	GO:0006508|proteolysis; GO:0008234|cysteine-type peptidase activity; GO:0004197|cysteine-type endopeptidase activity
HRV|gi|333980908|gb|AEG42385.1|	ENSP00000264275|CASP8	3	GO:0006508|proteolysis; GO:0008234|cysteine-type peptidase activity; GO:0004197|cysteine-type endopeptidase activity
HRV|gi|333980908|gb|AEG42385.1|	ENSP00000265164|CASP6	3	GO:0006508|proteolysis; GO:0008234|cysteine-type peptidase activity; GO:0004197|cysteine-type endopeptidase activity
HRV|gi|333980908|gb|AEG42385.1|	ENSP00000269143|AFG3L2	3	GO:0006508|proteolysis; GO:0000166|nucleotide binding; GO:0017111|nucleoside-triphosphatase activity
HRV|gi|333980908|gb|AEG42385.1|	ENSP00000271651|CTSK	3	GO:0006508|proteolysis; GO:0008234|cysteine-type peptidase activity; GO:0004197|cysteine-type endopeptidase activity
HRV|gi|333980908|gb|AEG42385.1|	ENSP00000272879|CASP10	3	GO:0006508|proteolysis; GO:0008234|cysteine-type peptidase activity; GO:0004197|cysteine-type endopeptidase activity
HRV|gi|333980908|gb|AEG42385.1|	ENSP00000285333|CASP6	3	GO:0006508|proteolysis; GO:0008234|cysteine-type peptidase activity; GO:0004197|cysteine-type endopeptidase activity
HRV|gi|333980908|gb|AEG42385.1|	ENSP00000286186|CASP10	3	GO:0006508|proteolysis; GO:0008234|cysteine-type peptidase activity; GO:0004197|cysteine-type endopeptidase activity
HRV|gi|333980908|gb|AEG42385.1|	ENSP00000298701|CASP7	3	GO:0006508|proteolysis; GO:0008234|cysteine-type peptidase activity; GO:0004197|cysteine-type endopeptidase activity
HRV|gi|333980908|gb|AEG42385.1|	ENSP00000298852|PSMC3	3	GO:0016032|viral reproduction; GO:0000166|nucleotide binding; GO:0017111|nucleoside-triphosphatase activity
HRV|gi|333980908|gb|AEG42385.1|	ENSP00000304161|MALT1	3	GO:0006508|proteolysis; GO:0004197|cysteine-type endopeptidase activity; GO:0008233|peptidase activity
HRV|gi|333980908|gb|AEG42385.1|	ENSP00000310832|CTSF	3	GO:0006508|proteolysis; GO:0008234|cysteine-type peptidase activity; GO:0004197|cysteine-type endopeptidase activity
HRV|gi|333980908|gb|AEG42385.1|	ENSP00000311318|ATG4D	3	GO:0006508|proteolysis; GO:0008234|cysteine-type peptidase activity; GO:0004197|cysteine-type endopeptidase activity
HRV|gi|333980908|gb|AEG42385.1|	ENSP00000312455|CFLAR	3	GO:0006508|proteolysis; GO:0008234|cysteine-type peptidase activity; GO:0004197|cysteine-type endopeptidase activity
HRV|gi|333980908|gb|AEG42385.1|	ENSP00000312664|CASP2	3	GO:0006508|proteolysis; GO:0008234|cysteine-type peptidase activity; GO:0004197|cysteine-type endopeptidase activity
HRV|gi|333980908|gb|AEG42385.1|	ENSP00000314599|CASP10	3	GO:0006508|proteolysis; GO:0008234|cysteine-type peptidase activity; GO:0004197|cysteine-type endopeptidase activity
HRV|gi|333980908|gb|AEG42385.1|	ENSP00000318480|YME1L1	3	GO:0006508|proteolysis; GO:0000166|nucleotide binding; GO:0017111|nucleoside-triphosphatase activity
HRV|gi|333980908|gb|AEG42385.1|	ENSP00000319279|MALT1	3	GO:0006508|proteolysis; GO:0004197|cysteine-type endopeptidase activity; GO:0008233|peptidase activity
HRV|gi|333980908|gb|AEG42385.1|	ENSP00000325722|CASP8	3	GO:0006508|proteolysis; GO:0008234|cysteine-type peptidase activity; GO:0004197|cysteine-type endopeptidase activity
HRV|gi|333980908|gb|AEG42385.1|	ENSP00000328010|USP6	3	GO:0006508|proteolysis; GO:0004197|cysteine-type endopeptidase activity; GO:0008233|peptidase activity
HRV|gi|333980908|gb|AEG42385.1|	ENSP00000334052|LGMN	3	GO:0006508|proteolysis; GO:0004197|cysteine-type endopeptidase activity; GO:0008233|peptidase activity
HRV|gi|333980908|gb|AEG42385.1|	ENSP00000339326|CFLAR	3	GO:0006508|proteolysis; GO:0008234|cysteine-type peptidase activity; GO:0004197|cysteine-type endopeptidase activity
HRV|gi|333980908|gb|AEG42385.1|	ENSP00000344132|CASP1	3	GO:0006508|proteolysis; GO:0008234|cysteine-type peptidase activity; GO:0004197|cysteine-type endopeptidase activity
HRV|gi|333980908|gb|AEG42385.1|	ENSP00000345344|CTSL1	3	GO:0006508|proteolysis; GO:0008234|cysteine-type peptidase activity; GO:0004197|cysteine-type endopeptidase activity
HRV|gi|333980908|gb|AEG42385.1|	ENSP00000345807|CFLAR	3	GO:0006508|proteolysis; GO:0008234|cysteine-type peptidase activity; GO:0004197|cysteine-type endopeptidase activity
HRV|gi|333980908|gb|AEG42385.1|	ENSP00000350181|CAPN3	3	GO:0006508|proteolysis; GO:0008234|cysteine-type peptidase activity; GO:0008233|peptidase activity
HRV|gi|333980908|gb|AEG42385.1|	ENSP00000353826|LONP1	3	GO:0006508|proteolysis; GO:0000166|nucleotide binding; GO:0017111|nucleoside-triphosphatase activity
HRV|gi|333980908|gb|AEG42385.1|	ENSP00000358321|CASP7	3	GO:0006508|proteolysis; GO:0008234|cysteine-type peptidase activity; GO:0004197|cysteine-type endopeptidase activity
HRV|gi|333980908|gb|AEG42385.1|	ENSP00000358322|CASP7	3	GO:0006508|proteolysis; GO:0008234|cysteine-type peptidase activity; GO:0004197|cysteine-type endopeptidase activity
HRV|gi|333980908|gb|AEG42385.1|	ENSP00000358327|CASP7	3	GO:0006508|proteolysis; GO:0008234|cysteine-type peptidase activity; GO:0004197|cysteine-type endopeptidase activity
HRV|gi|333980908|gb|AEG42385.1|	ENSP00000358337|CASP7	3	GO:0006508|proteolysis; GO:0008234|cysteine-type peptidase activity; GO:0004197|cysteine-type endopeptidase activity
HRV|gi|333980908|gb|AEG42385.1|	ENSP00000364574|RDBP	3	GO:0016032|viral reproduction; GO:0000166|nucleotide binding; GO:0003723|RNA binding
HRV|gi|333980908|gb|AEG42385.1|	ENSP00000364578|RDBP	3	GO:0016032|viral reproduction; GO:0000166|nucleotide binding; GO:0003723|RNA binding
HRV|gi|333980908|gb|AEG42385.1|	ENSP00000365051|CASP9	3	GO:0006508|proteolysis; GO:0008234|cysteine-type peptidase activity; GO:0004197|cysteine-type endopeptidase activity
HRV|gi|333980908|gb|AEG42385.1|	ENSP00000365061|CTSL1	3	GO:0006508|proteolysis; GO:0008234|cysteine-type peptidase activity; GO:0004197|cysteine-type endopeptidase activity
HRV|gi|333980908|gb|AEG42385.1|	ENSP00000365139|YME1L1	3	GO:0006508|proteolysis; GO:0000166|nucleotide binding; GO:0017111|nucleoside-triphosphatase activity
HRV|gi|333980908|gb|AEG42385.1|	ENSP00000365184|YME1L1	3	GO:0006508|proteolysis; GO:0000166|nucleotide binding; GO:0017111|nucleoside-triphosphatase activity
HRV|gi|333980908|gb|AEG42385.1|	ENSP00000372660|RDBP	3	GO:0016032|viral reproduction; GO:0000166|nucleotide binding; GO:0003723|RNA binding
HRV|gi|333980908|gb|AEG42385.1|	ENSP00000372834|RDBP	3	GO:0016032|viral reproduction; GO:0000166|nucleotide binding; GO:0003723|RNA binding
HRV|gi|333980908|gb|AEG42385.1|	ENSP00000376087|CASP8	3	GO:0006508|proteolysis; GO:0008234|cysteine-type peptidase activity; GO:0004197|cysteine-type endopeptidase activity
HRV|gi|333980908|gb|AEG42385.1|	ENSP00000376088|CASP8	3	GO:0006508|proteolysis; GO:0008234|cysteine-type peptidase activity; GO:0004197|cysteine-type endopeptidase activity
HRV|gi|333980908|gb|AEG42385.1|	ENSP00000376091|CASP8	3	GO:0006508|proteolysis; GO:0008234|cysteine-type peptidase activity; GO:0004197|cysteine-type endopeptidase activity
HRV|gi|333980908|gb|AEG42385.1|	ENSP00000376094|CASP8	3	GO:0006508|proteolysis; GO:0008234|cysteine-type peptidase activity; GO:0004197|cysteine-type endopeptidase activity
HRV|gi|333980908|gb|AEG42385.1|	ENSP00000376844|CASP1	3	GO:0006508|proteolysis; GO:0008234|cysteine-type peptidase activity; GO:0004197|cysteine-type endopeptidase activity
HRV|gi|333980908|gb|AEG42385.1|	ENSP00000376849|CASP5	3	GO:0006508|proteolysis; GO:0008234|cysteine-type peptidase activity; GO:0004197|cysteine-type endopeptidase activity
HRV|gi|333980908|gb|AEG42385.1|	ENSP00000376857|CASP4	3	GO:0006508|proteolysis; GO:0008234|cysteine-type peptidase activity; GO:0004197|cysteine-type endopeptidase activity
HRV|gi|333980908|gb|AEG42385.1|	ENSP00000376911|LGMN	3	GO:0006508|proteolysis; GO:0004197|cysteine-type endopeptidase activity; GO:0008233|peptidase activity
HRV|gi|333980908|gb|AEG42385.1|	ENSP00000377210|CASP3	3	GO:0006508|proteolysis; GO:0008234|cysteine-type peptidase activity; GO:0004197|cysteine-type endopeptidase activity
HRV|gi|333980908|gb|AEG42385.1|	ENSP00000380349|CAPN3	3	GO:0006508|proteolysis; GO:0008234|cysteine-type peptidase activity; GO:0008233|peptidase activity
HRV|gi|333980908|gb|AEG42385.1|	ENSP00000380384|CAPN3	3	GO:0006508|proteolysis; GO:0008234|cysteine-type peptidase activity; GO:0008233|peptidase activity
HRV|gi|333980908|gb|AEG42385.1|	ENSP00000388365|CASP5	3	GO:0006508|proteolysis; GO:0008234|cysteine-type peptidase activity; GO:0004197|cysteine-type endopeptidase activity
HRV|gi|333980908|gb|AEG42385.1|	ENSP00000388566|CASP4	3	GO:0006508|proteolysis; GO:0008234|cysteine-type peptidase activity; GO:0004197|cysteine-type endopeptidase activity
HRV|gi|333980908|gb|AEG42385.1|	ENSP00000393005|RDBP	3	GO:0016032|viral reproduction; GO:0000166|nucleotide binding; GO:0003723|RNA binding
HRV|gi|333980908|gb|AEG42385.1|	ENSP00000393417|CASP14	3	GO:0006508|proteolysis; GO:0008234|cysteine-type peptidase activity; GO:0004197|cysteine-type endopeptidase activity
HRV|gi|333980908|gb|AEG42385.1|	ENSP00000394434|CASP8	3	GO:0006508|proteolysis; GO:0008234|cysteine-type peptidase activity; GO:0004197|cysteine-type endopeptidase activity
HRV|gi|333980908|gb|AEG42385.1|	ENSP00000394879|RDBP	3	GO:0016032|viral reproduction; GO:0000166|nucleotide binding; GO:0003723|RNA binding
HRV|gi|333980908|gb|AEG42385.1|	ENSP00000396053|CASP5	3	GO:0006508|proteolysis; GO:0008234|cysteine-type peptidase activity; GO:0004197|cysteine-type endopeptidase activity
HRV|gi|333980908|gb|AEG42385.1|	ENSP00000396540|CASP9	3	GO:0006508|proteolysis; GO:0008234|cysteine-type peptidase activity; GO:0004197|cysteine-type endopeptidase activity
HRV|gi|333980908|gb|AEG42385.1|	ENSP00000396835|CASP10	3	GO:0006508|proteolysis; GO:0008234|cysteine-type peptidase activity; GO:0004197|cysteine-type endopeptidase activity
HRV|gi|333980908|gb|AEG42385.1|	ENSP00000398107|CASP7	3	GO:0006508|proteolysis; GO:0008234|cysteine-type peptidase activity; GO:0004197|cysteine-type endopeptidase activity
HRV|gi|333980908|gb|AEG42385.1|	ENSP00000398130|CASP5	3	GO:0006508|proteolysis; GO:0008234|cysteine-type peptidase activity; GO:0004197|cysteine-type endopeptidase activity
HRV|gi|333980908|gb|AEG42385.1|	ENSP00000399420|CFLAR	3	GO:0006508|proteolysis; GO:0008234|cysteine-type peptidase activity; GO:0004197|cysteine-type endopeptidase activity
HRV|gi|333980908|gb|AEG42385.1|	ENSP00000400094|CASP7	3	GO:0006508|proteolysis; GO:0008234|cysteine-type peptidase activity; GO:0004197|cysteine-type endopeptidase activity
HRV|gi|333980908|gb|AEG42385.1|	ENSP00000400592|CASP16	3	GO:0006508|proteolysis; GO:0008234|cysteine-type peptidase activity; GO:0004197|cysteine-type endopeptidase activity
HRV|gi|333980908|gb|AEG42385.1|	ENSP00000401802|PSMC6	3	GO:0016032|viral reproduction; GO:0000166|nucleotide binding; GO:0017111|nucleoside-triphosphatase activity
HRV|gi|333980908|gb|AEG42385.1|	ENSP00000403260|CASP1	3	GO:0006508|proteolysis; GO:0008234|cysteine-type peptidase activity; GO:0004197|cysteine-type endopeptidase activity
HRV|gi|333980908|gb|AEG42385.1|	ENSP00000403623|RDBP	3	GO:0016032|viral reproduction; GO:0000166|nucleotide binding; GO:0003723|RNA binding
HRV|gi|333980908|gb|AEG42385.1|	ENSP00000404783|ATG4B	3	GO:0006508|proteolysis; GO:0008234|cysteine-type peptidase activity; GO:0008233|peptidase activity
HRV|gi|333980908|gb|AEG42385.1|	ENSP00000408414|CTSS	3	GO:0006508|proteolysis; GO:0008234|cysteine-type peptidase activity; GO:0004197|cysteine-type endopeptidase activity
HRV|gi|333980908|gb|AEG42385.1|	ENSP00000408446|CASP1	3	GO:0006508|proteolysis; GO:0008234|cysteine-type peptidase activity; GO:0004197|cysteine-type endopeptidase activity
HRV|gi|333980908|gb|AEG42385.1|	ENSP00000408455|CASP5	3	GO:0006508|proteolysis; GO:0008234|cysteine-type peptidase activity; GO:0004197|cysteine-type endopeptidase activity
HRV|gi|333980908|gb|AEG42385.1|	ENSP00000408691|CASP9	3	GO:0006508|proteolysis; GO:0008234|cysteine-type peptidase activity; GO:0004197|cysteine-type endopeptidase activity
HRV|gi|333980908|gb|AEG42385.1|	ENSP00000410076|CASP1	3	GO:0006508|proteolysis; GO:0008234|cysteine-type peptidase activity; GO:0004197|cysteine-type endopeptidase activity
HRV|gi|333980908|gb|AEG42385.1|	ENSP00000411254|CTSB	3	GO:0006508|proteolysis; GO:0008234|cysteine-type peptidase activity; GO:0004197|cysteine-type endopeptidase activity
HRV|gi|333980908|gb|AEG42385.1|	ENSP00000411304|CASP9	3	GO:0006508|proteolysis; GO:0008234|cysteine-type peptidase activity; GO:0004197|cysteine-type endopeptidase activity
HRV|gi|333980908|gb|AEG42385.1|	ENSP00000411535|CFLAR	3	GO:0006508|proteolysis; GO:0008234|cysteine-type peptidase activity; GO:0004197|cysteine-type endopeptidase activity
HRV|gi|333980908|gb|AEG42385.1|	ENSP00000412523|CASP8	3	GO:0006508|proteolysis; GO:0008234|cysteine-type peptidase activity; GO:0004197|cysteine-type endopeptidase activity
HRV|gi|333980908|gb|AEG42385.1|	ENSP00000413270|CFLAR	3	GO:0006508|proteolysis; GO:0008234|cysteine-type peptidase activity; GO:0004197|cysteine-type endopeptidase activity
HRV|gi|333980908|gb|AEG42385.1|	ENSP00000414904|CTSO	3	GO:0006508|proteolysis; GO:0008234|cysteine-type peptidase activity; GO:0004197|cysteine-type endopeptidase activity
HRV|gi|333980908|gb|AEG42385.1|	ENSP00000415983|LONP2	3	GO:0006508|proteolysis; GO:0000166|nucleotide binding; GO:0017111|nucleoside-triphosphatase activity
HRV|gi|333980908|gb|AEG42385.1|	ENSP00000423970|CASP12	3	GO:0006508|proteolysis; GO:0008234|cysteine-type peptidase activity; GO:0004197|cysteine-type endopeptidase activity
HRV|gi|333980908|gb|AEG42385.1|	ENSP00000424038|CASP12	3	GO:0006508|proteolysis; GO:0008234|cysteine-type peptidase activity; GO:0004197|cysteine-type endopeptidase activity
HRV|gi|333980908|gb|AEG42385.1|	ENSP00000425652|CASP12	3	GO:0006508|proteolysis; GO:0008234|cysteine-type peptidase activity; GO:0004197|cysteine-type endopeptidase activity
HRV|gi|333980908|gb|AEG42385.1|	ENSP00000426566|CASP12	3	GO:0006508|proteolysis; GO:0008234|cysteine-type peptidase activity; GO:0004197|cysteine-type endopeptidase activity
HRV|gi|333980908|gb|AEG42385.1|	ENSP00000427128|CASP12	3	GO:0006508|proteolysis; GO:0008234|cysteine-type peptidase activity; GO:0004197|cysteine-type endopeptidase activity
HRV|gi|333980908|gb|AEG42385.1|	ENSP00000427669|CASP6	3	GO:0006508|proteolysis; GO:0008234|cysteine-type peptidase activity; GO:0004197|cysteine-type endopeptidase activity
HRV|gi|333980908|gb|AEG42385.1|	ENSP00000428372|CASP3	3	GO:0006508|proteolysis; GO:0008234|cysteine-type peptidase activity; GO:0004197|cysteine-type endopeptidase activity
HRV|gi|333980908|gb|AEG42385.1|	ENSP00000431518|CTSB	3	GO:0006508|proteolysis; GO:0008234|cysteine-type peptidase activity; GO:0004197|cysteine-type endopeptidase activity
HRV|gi|333980908|gb|AEG42385.1|	ENSP00000432340|CASP1	3	GO:0006508|proteolysis; GO:0008234|cysteine-type peptidase activity; GO:0004197|cysteine-type endopeptidase activity
HRV|gi|333980908|gb|AEG42385.1|	ENSP00000433995|CTSB	3	GO:0006508|proteolysis; GO:0008234|cysteine-type peptidase activity; GO:0004197|cysteine-type endopeptidase activity
HRV|gi|333980908|gb|AEG42385.1|	ENSP00000434250|CASP1	3	GO:0006508|proteolysis; GO:0008234|cysteine-type peptidase activity; GO:0004197|cysteine-type endopeptidase activity
HRV|gi|333980908|gb|AEG42385.1|	ENSP00000434259|CASP1	3	GO:0006508|proteolysis; GO:0008234|cysteine-type peptidase activity; GO:0004197|cysteine-type endopeptidase activity
HRV|gi|333980908|gb|AEG42385.1|	ENSP00000434303|CASP1	3	GO:0006508|proteolysis; GO:0008234|cysteine-type peptidase activity; GO:0004197|cysteine-type endopeptidase activity
HRV|gi|333980908|gb|AEG42385.1|	ENSP00000434471|CASP5	3	GO:0006508|proteolysis; GO:0008234|cysteine-type peptidase activity; GO:0004197|cysteine-type endopeptidase activity
HRV|gi|333980908|gb|AEG42385.1|	ENSP00000434725|CTSB	3	GO:0006508|proteolysis; GO:0008234|cysteine-type peptidase activity; GO:0004197|cysteine-type endopeptidase activity
HRV|gi|333980908|gb|AEG42385.1|	ENSP00000434779|CASP1	3	GO:0006508|proteolysis; GO:0008234|cysteine-type peptidase activity; GO:0004197|cysteine-type endopeptidase activity
HRV|gi|333980908|gb|AEG42385.1|	ENSP00000435074|CTSB	3	GO:0006508|proteolysis; GO:0008234|cysteine-type peptidase activity; GO:0004197|cysteine-type endopeptidase activity
HRV|gi|333980908|gb|AEG42385.1|	ENSP00000435329|CTSH	3	GO:0006508|proteolysis; GO:0008234|cysteine-type peptidase activity; GO:0004197|cysteine-type endopeptidase activity
HRV|gi|333980908|gb|AEG42385.1|	ENSP00000435367|CTSB	3	GO:0006508|proteolysis; GO:0008234|cysteine-type peptidase activity; GO:0004197|cysteine-type endopeptidase activity
HRV|gi|333980908|gb|AEG42385.1|	ENSP00000435536|CASP1	3	GO:0006508|proteolysis; GO:0008234|cysteine-type peptidase activity; GO:0004197|cysteine-type endopeptidase activity
HRV|gi|333980908|gb|AEG42385.1|	ENSP00000436122|CTSB	3	GO:0006508|proteolysis; GO:0008234|cysteine-type peptidase activity; GO:0004197|cysteine-type endopeptidase activity
HRV|gi|333980908|gb|AEG42385.1|	ENSP00000436159|CTSB	3	GO:0006508|proteolysis; GO:0008234|cysteine-type peptidase activity; GO:0004197|cysteine-type endopeptidase activity
HRV|gi|333980908|gb|AEG42385.1|	ENSP00000436456|CTSB	3	GO:0006508|proteolysis; GO:0008234|cysteine-type peptidase activity; GO:0004197|cysteine-type endopeptidase activity
HRV|gi|333980908|gb|AEG42385.1|	ENSP00000436627|CTSB	3	GO:0006508|proteolysis; GO:0008234|cysteine-type peptidase activity; GO:0004197|cysteine-type endopeptidase activity
HRV|gi|333980908|gb|AEG42385.1|	ENSP00000436875|CASP1	3	GO:0006508|proteolysis; GO:0008234|cysteine-type peptidase activity; GO:0004197|cysteine-type endopeptidase activity
HRV|gi|333980908|gb|AEG42385.1|	ENSP00000436877|CASP5	3	GO:0006508|proteolysis; GO:0008234|cysteine-type peptidase activity; GO:0004197|cysteine-type endopeptidase activity
HRV|gi|333980908|gb|AEG42385.1|	ENSP00000441523|LONP1	3	GO:0006508|proteolysis; GO:0000166|nucleotide binding; GO:0017111|nucleoside-triphosphatase activity
HRV|gi|333980908|gb|AEG42385.1|	ENSP00000442699|HTATSF1	3	GO:0019079|viral genome replication; GO:0000166|nucleotide binding; GO:0003723|RNA binding
HRV|gi|333980908|gb|AEG42385.1|	ENSP00000445052|CTSL2	3	GO:0006508|proteolysis; GO:0008234|cysteine-type peptidase activity; GO:0004197|cysteine-type endopeptidase activity
HRV|gi|333980908|gb|AEG42385.1|	ENSP00000445426|LONP2	3	GO:0006508|proteolysis; GO:0000166|nucleotide binding; GO:0017111|nucleoside-triphosphatase activity
HRV|gi|333980908|gb|AEG42385.1|	ENSP00000447844|RDBP	3	GO:0016032|viral reproduction; GO:0000166|nucleotide binding; GO:0003723|RNA binding
HRV|gi|333980908|gb|AEG42385.1|	ENSP00000447903|RDBP	3	GO:0016032|viral reproduction; GO:0000166|nucleotide binding; GO:0003723|RNA binding
HRV|gi|333980908|gb|AEG42385.1|	ENSP00000449584|CASP9	3	GO:0006508|proteolysis; GO:0008234|cysteine-type peptidase activity; GO:0004197|cysteine-type endopeptidase activity
HRV|gi|333980908|gb|AEG42385.1|	ENSP00000449831|ESPL1	3	GO:0006508|proteolysis; GO:0008234|cysteine-type peptidase activity; GO:0008233|peptidase activity
HRV|gi|333980908|gb|AEG42385.1|	ENSP00000449897|RDBP	3	GO:0016032|viral reproduction; GO:0000166|nucleotide binding; GO:0003723|RNA binding
HRV|gi|333980908|gb|AEG42385.1|	ENSP00000449910|RDBP	3	GO:0016032|viral reproduction; GO:0000166|nucleotide binding; GO:0003723|RNA binding
HRV|gi|333980908|gb|AEG42385.1|	ENSP00000450250|RDBP	3	GO:0016032|viral reproduction; GO:0000166|nucleotide binding; GO:0003723|RNA binding
HRV|gi|333980908|gb|AEG42385.1|	ENSP00000460380|USP6	3	GO:0006508|proteolysis; GO:0004197|cysteine-type endopeptidase activity; GO:0008233|peptidase activity
HRV|gi|333980908|gb|AEG42385.1|	ENSP00000460395|CTSO	3	GO:0006508|proteolysis; GO:0008234|cysteine-type peptidase activity; GO:0004197|cysteine-type endopeptidase activity
HRV|gi|333980908|gb|AEG42385.1|	ENSP00000462442|BLMH	3	GO:0006508|proteolysis; GO:0004197|cysteine-type endopeptidase activity; GO:0008233|peptidase activity
HRV|gi|355429265|gb|AER92564.1|	ENSP00000183936|CAPN3	3	GO:0006508|proteolysis; GO:0008234|cysteine-type peptidase activity; GO:0008233|peptidase activity
HRV|gi|355429265|gb|AER92564.1|	ENSP00000218364|HTATSF1	3	GO:0019079|viral genome replication; GO:0000166|nucleotide binding; GO:0003723|RNA binding
HRV|gi|355429265|gb|AER92564.1|	ENSP00000219611|SOLH	3	GO:0006508|proteolysis; GO:0008234|cysteine-type peptidase activity; GO:0008233|peptidase activity
HRV|gi|355429265|gb|AER92564.1|	ENSP00000221740|CASP14	3	GO:0006508|proteolysis; GO:0008234|cysteine-type peptidase activity; GO:0004197|cysteine-type endopeptidase activity
HRV|gi|355429265|gb|AER92564.1|	ENSP00000237865|CASP10	3	GO:0006508|proteolysis; GO:0008234|cysteine-type peptidase activity; GO:0004197|cysteine-type endopeptidase activity
HRV|gi|355429265|gb|AER92564.1|	ENSP00000250066|USP6	3	GO:0006508|proteolysis; GO:0004197|cysteine-type endopeptidase activity; GO:0008233|peptidase activity
HRV|gi|355429265|gb|AER92564.1|	ENSP00000255078|IGHMBP2	3	GO:0000166|nucleotide binding; GO:0003723|RNA binding; GO:0017111|nucleoside-triphosphatase activity
HRV|gi|355429265|gb|AER92564.1|	ENSP00000257934|ESPL1	3	GO:0006508|proteolysis; GO:0008234|cysteine-type peptidase activity; GO:0008233|peptidase activity
HRV|gi|355429265|gb|AER92564.1|	ENSP00000259470|CTSL2	3	GO:0006508|proteolysis; GO:0008234|cysteine-type peptidase activity; GO:0004197|cysteine-type endopeptidase activity
HRV|gi|355429265|gb|AER92564.1|	ENSP00000260315|CASP5	3	GO:0006508|proteolysis; GO:0008234|cysteine-type peptidase activity; GO:0004197|cysteine-type endopeptidase activity
HRV|gi|355429265|gb|AER92564.1|	ENSP00000261714|BLMH	3	GO:0006508|proteolysis; GO:0008234|cysteine-type peptidase activity; GO:0004197|cysteine-type endopeptidase activity
HRV|gi|355429265|gb|AER92564.1|	ENSP00000264274|CASP8	3	GO:0006508|proteolysis; GO:0008234|cysteine-type peptidase activity; GO:0004197|cysteine-type endopeptidase activity
HRV|gi|355429265|gb|AER92564.1|	ENSP00000264275|CASP8	3	GO:0006508|proteolysis; GO:0008234|cysteine-type peptidase activity; GO:0004197|cysteine-type endopeptidase activity
HRV|gi|355429265|gb|AER92564.1|	ENSP00000265164|CASP6	3	GO:0006508|proteolysis; GO:0008234|cysteine-type peptidase activity; GO:0004197|cysteine-type endopeptidase activity
HRV|gi|355429265|gb|AER92564.1|	ENSP00000269143|AFG3L2	3	GO:0006508|proteolysis; GO:0000166|nucleotide binding; GO:0017111|nucleoside-triphosphatase activity
HRV|gi|355429265|gb|AER92564.1|	ENSP00000271651|CTSK	3	GO:0006508|proteolysis; GO:0008234|cysteine-type peptidase activity; GO:0004197|cysteine-type endopeptidase activity
HRV|gi|355429265|gb|AER92564.1|	ENSP00000272879|CASP10	3	GO:0006508|proteolysis; GO:0008234|cysteine-type peptidase activity; GO:0004197|cysteine-type endopeptidase activity
HRV|gi|355429265|gb|AER92564.1|	ENSP00000285333|CASP6	3	GO:0006508|proteolysis; GO:0008234|cysteine-type peptidase activity; GO:0004197|cysteine-type endopeptidase activity
HRV|gi|355429265|gb|AER92564.1|	ENSP00000286186|CASP10	3	GO:0006508|proteolysis; GO:0008234|cysteine-type peptidase activity; GO:0004197|cysteine-type endopeptidase activity
HRV|gi|355429265|gb|AER92564.1|	ENSP00000298701|CASP7	3	GO:0006508|proteolysis; GO:0008234|cysteine-type peptidase activity; GO:0004197|cysteine-type endopeptidase activity
HRV|gi|355429265|gb|AER92564.1|	ENSP00000298852|PSMC3	3	GO:0016032|viral reproduction; GO:0000166|nucleotide binding; GO:0017111|nucleoside-triphosphatase activity
HRV|gi|355429265|gb|AER92564.1|	ENSP00000304161|MALT1	3	GO:0006508|proteolysis; GO:0004197|cysteine-type endopeptidase activity; GO:0008233|peptidase activity
HRV|gi|355429265|gb|AER92564.1|	ENSP00000310832|CTSF	3	GO:0006508|proteolysis; GO:0008234|cysteine-type peptidase activity; GO:0004197|cysteine-type endopeptidase activity
HRV|gi|355429265|gb|AER92564.1|	ENSP00000311318|ATG4D	3	GO:0006508|proteolysis; GO:0008234|cysteine-type peptidase activity; GO:0004197|cysteine-type endopeptidase activity
HRV|gi|355429265|gb|AER92564.1|	ENSP00000312455|CFLAR	3	GO:0006508|proteolysis; GO:0008234|cysteine-type peptidase activity; GO:0004197|cysteine-type endopeptidase activity
HRV|gi|355429265|gb|AER92564.1|	ENSP00000312664|CASP2	3	GO:0006508|proteolysis; GO:0008234|cysteine-type peptidase activity; GO:0004197|cysteine-type endopeptidase activity
HRV|gi|355429265|gb|AER92564.1|	ENSP00000314599|CASP10	3	GO:0006508|proteolysis; GO:0008234|cysteine-type peptidase activity; GO:0004197|cysteine-type endopeptidase activity
HRV|gi|355429265|gb|AER92564.1|	ENSP00000318480|YME1L1	3	GO:0006508|proteolysis; GO:0000166|nucleotide binding; GO:0017111|nucleoside-triphosphatase activity
HRV|gi|355429265|gb|AER92564.1|	ENSP00000319279|MALT1	3	GO:0006508|proteolysis; GO:0004197|cysteine-type endopeptidase activity; GO:0008233|peptidase activity
HRV|gi|355429265|gb|AER92564.1|	ENSP00000325722|CASP8	3	GO:0006508|proteolysis; GO:0008234|cysteine-type peptidase activity; GO:0004197|cysteine-type endopeptidase activity
HRV|gi|355429265|gb|AER92564.1|	ENSP00000328010|USP6	3	GO:0006508|proteolysis; GO:0004197|cysteine-type endopeptidase activity; GO:0008233|peptidase activity
HRV|gi|355429265|gb|AER92564.1|	ENSP00000334052|LGMN	3	GO:0006508|proteolysis; GO:0004197|cysteine-type endopeptidase activity; GO:0008233|peptidase activity
HRV|gi|355429265|gb|AER92564.1|	ENSP00000339326|CFLAR	3	GO:0006508|proteolysis; GO:0008234|cysteine-type peptidase activity; GO:0004197|cysteine-type endopeptidase activity
HRV|gi|355429265|gb|AER92564.1|	ENSP00000344132|CASP1	3	GO:0006508|proteolysis; GO:0008234|cysteine-type peptidase activity; GO:0004197|cysteine-type endopeptidase activity
HRV|gi|355429265|gb|AER92564.1|	ENSP00000345344|CTSL1	3	GO:0006508|proteolysis; GO:0008234|cysteine-type peptidase activity; GO:0004197|cysteine-type endopeptidase activity
HRV|gi|355429265|gb|AER92564.1|	ENSP00000345807|CFLAR	3	GO:0006508|proteolysis; GO:0008234|cysteine-type peptidase activity; GO:0004197|cysteine-type endopeptidase activity
HRV|gi|355429265|gb|AER92564.1|	ENSP00000350181|CAPN3	3	GO:0006508|proteolysis; GO:0008234|cysteine-type peptidase activity; GO:0008233|peptidase activity
HRV|gi|355429265|gb|AER92564.1|	ENSP00000353826|LONP1	3	GO:0006508|proteolysis; GO:0000166|nucleotide binding; GO:0017111|nucleoside-triphosphatase activity
HRV|gi|355429265|gb|AER92564.1|	ENSP00000358321|CASP7	3	GO:0006508|proteolysis; GO:0008234|cysteine-type peptidase activity; GO:0004197|cysteine-type endopeptidase activity
HRV|gi|355429265|gb|AER92564.1|	ENSP00000358322|CASP7	3	GO:0006508|proteolysis; GO:0008234|cysteine-type peptidase activity; GO:0004197|cysteine-type endopeptidase activity
HRV|gi|355429265|gb|AER92564.1|	ENSP00000358327|CASP7	3	GO:0006508|proteolysis; GO:0008234|cysteine-type peptidase activity; GO:0004197|cysteine-type endopeptidase activity
HRV|gi|355429265|gb|AER92564.1|	ENSP00000358337|CASP7	3	GO:0006508|proteolysis; GO:0008234|cysteine-type peptidase activity; GO:0004197|cysteine-type endopeptidase activity
HRV|gi|355429265|gb|AER92564.1|	ENSP00000364574|RDBP	3	GO:0016032|viral reproduction; GO:0000166|nucleotide binding; GO:0003723|RNA binding
HRV|gi|355429265|gb|AER92564.1|	ENSP00000364578|RDBP	3	GO:0016032|viral reproduction; GO:0000166|nucleotide binding; GO:0003723|RNA binding
HRV|gi|355429265|gb|AER92564.1|	ENSP00000365051|CASP9	3	GO:0006508|proteolysis; GO:0008234|cysteine-type peptidase activity; GO:0004197|cysteine-type endopeptidase activity
HRV|gi|355429265|gb|AER92564.1|	ENSP00000365061|CTSL1	3	GO:0006508|proteolysis; GO:0008234|cysteine-type peptidase activity; GO:0004197|cysteine-type endopeptidase activity
HRV|gi|355429265|gb|AER92564.1|	ENSP00000365139|YME1L1	3	GO:0006508|proteolysis; GO:0000166|nucleotide binding; GO:0017111|nucleoside-triphosphatase activity
HRV|gi|355429265|gb|AER92564.1|	ENSP00000365184|YME1L1	3	GO:0006508|proteolysis; GO:0000166|nucleotide binding; GO:0017111|nucleoside-triphosphatase activity
HRV|gi|355429265|gb|AER92564.1|	ENSP00000372660|RDBP	3	GO:0016032|viral reproduction; GO:0000166|nucleotide binding; GO:0003723|RNA binding
HRV|gi|355429265|gb|AER92564.1|	ENSP00000372834|RDBP	3	GO:0016032|viral reproduction; GO:0000166|nucleotide binding; GO:0003723|RNA binding
HRV|gi|355429265|gb|AER92564.1|	ENSP00000376087|CASP8	3	GO:0006508|proteolysis; GO:0008234|cysteine-type peptidase activity; GO:0004197|cysteine-type endopeptidase activity
HRV|gi|355429265|gb|AER92564.1|	ENSP00000376088|CASP8	3	GO:0006508|proteolysis; GO:0008234|cysteine-type peptidase activity; GO:0004197|cysteine-type endopeptidase activity
HRV|gi|355429265|gb|AER92564.1|	ENSP00000376091|CASP8	3	GO:0006508|proteolysis; GO:0008234|cysteine-type peptidase activity; GO:0004197|cysteine-type endopeptidase activity
HRV|gi|355429265|gb|AER92564.1|	ENSP00000376094|CASP8	3	GO:0006508|proteolysis; GO:0008234|cysteine-type peptidase activity; GO:0004197|cysteine-type endopeptidase activity
HRV|gi|355429265|gb|AER92564.1|	ENSP00000376844|CASP1	3	GO:0006508|proteolysis; GO:0008234|cysteine-type peptidase activity; GO:0004197|cysteine-type endopeptidase activity
HRV|gi|355429265|gb|AER92564.1|	ENSP00000376849|CASP5	3	GO:0006508|proteolysis; GO:0008234|cysteine-type peptidase activity; GO:0004197|cysteine-type endopeptidase activity
HRV|gi|355429265|gb|AER92564.1|	ENSP00000376857|CASP4	3	GO:0006508|proteolysis; GO:0008234|cysteine-type peptidase activity; GO:0004197|cysteine-type endopeptidase activity
HRV|gi|355429265|gb|AER92564.1|	ENSP00000376911|LGMN	3	GO:0006508|proteolysis; GO:0004197|cysteine-type endopeptidase activity; GO:0008233|peptidase activity
HRV|gi|355429265|gb|AER92564.1|	ENSP00000377210|CASP3	3	GO:0006508|proteolysis; GO:0008234|cysteine-type peptidase activity; GO:0004197|cysteine-type endopeptidase activity
HRV|gi|355429265|gb|AER92564.1|	ENSP00000380349|CAPN3	3	GO:0006508|proteolysis; GO:0008234|cysteine-type peptidase activity; GO:0008233|peptidase activity
HRV|gi|355429265|gb|AER92564.1|	ENSP00000380384|CAPN3	3	GO:0006508|proteolysis; GO:0008234|cysteine-type peptidase activity; GO:0008233|peptidase activity
HRV|gi|355429265|gb|AER92564.1|	ENSP00000388365|CASP5	3	GO:0006508|proteolysis; GO:0008234|cysteine-type peptidase activity; GO:0004197|cysteine-type endopeptidase activity
HRV|gi|355429265|gb|AER92564.1|	ENSP00000388566|CASP4	3	GO:0006508|proteolysis; GO:0008234|cysteine-type peptidase activity; GO:0004197|cysteine-type endopeptidase activity
HRV|gi|355429265|gb|AER92564.1|	ENSP00000393005|RDBP	3	GO:0016032|viral reproduction; GO:0000166|nucleotide binding; GO:0003723|RNA binding
HRV|gi|355429265|gb|AER92564.1|	ENSP00000393417|CASP14	3	GO:0006508|proteolysis; GO:0008234|cysteine-type peptidase activity; GO:0004197|cysteine-type endopeptidase activity
HRV|gi|355429265|gb|AER92564.1|	ENSP00000394434|CASP8	3	GO:0006508|proteolysis; GO:0008234|cysteine-type peptidase activity; GO:0004197|cysteine-type endopeptidase activity
HRV|gi|355429265|gb|AER92564.1|	ENSP00000394879|RDBP	3	GO:0016032|viral reproduction; GO:0000166|nucleotide binding; GO:0003723|RNA binding
HRV|gi|355429265|gb|AER92564.1|	ENSP00000396053|CASP5	3	GO:0006508|proteolysis; GO:0008234|cysteine-type peptidase activity; GO:0004197|cysteine-type endopeptidase activity
HRV|gi|355429265|gb|AER92564.1|	ENSP00000396540|CASP9	3	GO:0006508|proteolysis; GO:0008234|cysteine-type peptidase activity; GO:0004197|cysteine-type endopeptidase activity
HRV|gi|355429265|gb|AER92564.1|	ENSP00000396835|CASP10	3	GO:0006508|proteolysis; GO:0008234|cysteine-type peptidase activity; GO:0004197|cysteine-type endopeptidase activity
HRV|gi|355429265|gb|AER92564.1|	ENSP00000398107|CASP7	3	GO:0006508|proteolysis; GO:0008234|cysteine-type peptidase activity; GO:0004197|cysteine-type endopeptidase activity
HRV|gi|355429265|gb|AER92564.1|	ENSP00000398130|CASP5	3	GO:0006508|proteolysis; GO:0008234|cysteine-type peptidase activity; GO:0004197|cysteine-type endopeptidase activity
HRV|gi|355429265|gb|AER92564.1|	ENSP00000399420|CFLAR	3	GO:0006508|proteolysis; GO:0008234|cysteine-type peptidase activity; GO:0004197|cysteine-type endopeptidase activity
HRV|gi|355429265|gb|AER92564.1|	ENSP00000400094|CASP7	3	GO:0006508|proteolysis; GO:0008234|cysteine-type peptidase activity; GO:0004197|cysteine-type endopeptidase activity
HRV|gi|355429265|gb|AER92564.1|	ENSP00000400592|CASP16	3	GO:0006508|proteolysis; GO:0008234|cysteine-type peptidase activity; GO:0004197|cysteine-type endopeptidase activity
HRV|gi|355429265|gb|AER92564.1|	ENSP00000401802|PSMC6	3	GO:0016032|viral reproduction; GO:0000166|nucleotide binding; GO:0017111|nucleoside-triphosphatase activity
HRV|gi|355429265|gb|AER92564.1|	ENSP00000403260|CASP1	3	GO:0006508|proteolysis; GO:0008234|cysteine-type peptidase activity; GO:0004197|cysteine-type endopeptidase activity
HRV|gi|355429265|gb|AER92564.1|	ENSP00000403623|RDBP	3	GO:0016032|viral reproduction; GO:0000166|nucleotide binding; GO:0003723|RNA binding
HRV|gi|355429265|gb|AER92564.1|	ENSP00000404783|ATG4B	3	GO:0006508|proteolysis; GO:0008234|cysteine-type peptidase activity; GO:0008233|peptidase activity
HRV|gi|355429265|gb|AER92564.1|	ENSP00000408414|CTSS	3	GO:0006508|proteolysis; GO:0008234|cysteine-type peptidase activity; GO:0004197|cysteine-type endopeptidase activity
HRV|gi|355429265|gb|AER92564.1|	ENSP00000408446|CASP1	3	GO:0006508|proteolysis; GO:0008234|cysteine-type peptidase activity; GO:0004197|cysteine-type endopeptidase activity
HRV|gi|355429265|gb|AER92564.1|	ENSP00000408455|CASP5	3	GO:0006508|proteolysis; GO:0008234|cysteine-type peptidase activity; GO:0004197|cysteine-type endopeptidase activity
HRV|gi|355429265|gb|AER92564.1|	ENSP00000408691|CASP9	3	GO:0006508|proteolysis; GO:0008234|cysteine-type peptidase activity; GO:0004197|cysteine-type endopeptidase activity
HRV|gi|355429265|gb|AER92564.1|	ENSP00000410076|CASP1	3	GO:0006508|proteolysis; GO:0008234|cysteine-type peptidase activity; GO:0004197|cysteine-type endopeptidase activity
HRV|gi|355429265|gb|AER92564.1|	ENSP00000411254|CTSB	3	GO:0006508|proteolysis; GO:0008234|cysteine-type peptidase activity; GO:0004197|cysteine-type endopeptidase activity
HRV|gi|355429265|gb|AER92564.1|	ENSP00000411304|CASP9	3	GO:0006508|proteolysis; GO:0008234|cysteine-type peptidase activity; GO:0004197|cysteine-type endopeptidase activity
HRV|gi|355429265|gb|AER92564.1|	ENSP00000411535|CFLAR	3	GO:0006508|proteolysis; GO:0008234|cysteine-type peptidase activity; GO:0004197|cysteine-type endopeptidase activity
HRV|gi|355429265|gb|AER92564.1|	ENSP00000412523|CASP8	3	GO:0006508|proteolysis; GO:0008234|cysteine-type peptidase activity; GO:0004197|cysteine-type endopeptidase activity
HRV|gi|355429265|gb|AER92564.1|	ENSP00000413270|CFLAR	3	GO:0006508|proteolysis; GO:0008234|cysteine-type peptidase activity; GO:0004197|cysteine-type endopeptidase activity
HRV|gi|355429265|gb|AER92564.1|	ENSP00000414904|CTSO	3	GO:0006508|proteolysis; GO:0008234|cysteine-type peptidase activity; GO:0004197|cysteine-type endopeptidase activity
HRV|gi|355429265|gb|AER92564.1|	ENSP00000415983|LONP2	3	GO:0006508|proteolysis; GO:0000166|nucleotide binding; GO:0017111|nucleoside-triphosphatase activity
HRV|gi|355429265|gb|AER92564.1|	ENSP00000423970|CASP12	3	GO:0006508|proteolysis; GO:0008234|cysteine-type peptidase activity; GO:0004197|cysteine-type endopeptidase activity
HRV|gi|355429265|gb|AER92564.1|	ENSP00000424038|CASP12	3	GO:0006508|proteolysis; GO:0008234|cysteine-type peptidase activity; GO:0004197|cysteine-type endopeptidase activity
HRV|gi|355429265|gb|AER92564.1|	ENSP00000425652|CASP12	3	GO:0006508|proteolysis; GO:0008234|cysteine-type peptidase activity; GO:0004197|cysteine-type endopeptidase activity
HRV|gi|355429265|gb|AER92564.1|	ENSP00000426566|CASP12	3	GO:0006508|proteolysis; GO:0008234|cysteine-type peptidase activity; GO:0004197|cysteine-type endopeptidase activity
HRV|gi|355429265|gb|AER92564.1|	ENSP00000427128|CASP12	3	GO:0006508|proteolysis; GO:0008234|cysteine-type peptidase activity; GO:0004197|cysteine-type endopeptidase activity
HRV|gi|355429265|gb|AER92564.1|	ENSP00000427669|CASP6	3	GO:0006508|proteolysis; GO:0008234|cysteine-type peptidase activity; GO:0004197|cysteine-type endopeptidase activity
HRV|gi|355429265|gb|AER92564.1|	ENSP00000428372|CASP3	3	GO:0006508|proteolysis; GO:0008234|cysteine-type peptidase activity; GO:0004197|cysteine-type endopeptidase activity
HRV|gi|355429265|gb|AER92564.1|	ENSP00000431518|CTSB	3	GO:0006508|proteolysis; GO:0008234|cysteine-type peptidase activity; GO:0004197|cysteine-type endopeptidase activity
HRV|gi|355429265|gb|AER92564.1|	ENSP00000432340|CASP1	3	GO:0006508|proteolysis; GO:0008234|cysteine-type peptidase activity; GO:0004197|cysteine-type endopeptidase activity
HRV|gi|355429265|gb|AER92564.1|	ENSP00000433995|CTSB	3	GO:0006508|proteolysis; GO:0008234|cysteine-type peptidase activity; GO:0004197|cysteine-type endopeptidase activity
HRV|gi|355429265|gb|AER92564.1|	ENSP00000434250|CASP1	3	GO:0006508|proteolysis; GO:0008234|cysteine-type peptidase activity; GO:0004197|cysteine-type endopeptidase activity
HRV|gi|355429265|gb|AER92564.1|	ENSP00000434259|CASP1	3	GO:0006508|proteolysis; GO:0008234|cysteine-type peptidase activity; GO:0004197|cysteine-type endopeptidase activity
HRV|gi|355429265|gb|AER92564.1|	ENSP00000434303|CASP1	3	GO:0006508|proteolysis; GO:0008234|cysteine-type peptidase activity; GO:0004197|cysteine-type endopeptidase activity
HRV|gi|355429265|gb|AER92564.1|	ENSP00000434471|CASP5	3	GO:0006508|proteolysis; GO:0008234|cysteine-type peptidase activity; GO:0004197|cysteine-type endopeptidase activity
HRV|gi|355429265|gb|AER92564.1|	ENSP00000434725|CTSB	3	GO:0006508|proteolysis; GO:0008234|cysteine-type peptidase activity; GO:0004197|cysteine-type endopeptidase activity
HRV|gi|355429265|gb|AER92564.1|	ENSP00000434779|CASP1	3	GO:0006508|proteolysis; GO:0008234|cysteine-type peptidase activity; GO:0004197|cysteine-type endopeptidase activity
HRV|gi|355429265|gb|AER92564.1|	ENSP00000435074|CTSB	3	GO:0006508|proteolysis; GO:0008234|cysteine-type peptidase activity; GO:0004197|cysteine-type endopeptidase activity
HRV|gi|355429265|gb|AER92564.1|	ENSP00000435329|CTSH	3	GO:0006508|proteolysis; GO:0008234|cysteine-type peptidase activity; GO:0004197|cysteine-type endopeptidase activity
HRV|gi|355429265|gb|AER92564.1|	ENSP00000435367|CTSB	3	GO:0006508|proteolysis; GO:0008234|cysteine-type peptidase activity; GO:0004197|cysteine-type endopeptidase activity
HRV|gi|355429265|gb|AER92564.1|	ENSP00000435536|CASP1	3	GO:0006508|proteolysis; GO:0008234|cysteine-type peptidase activity; GO:0004197|cysteine-type endopeptidase activity
HRV|gi|355429265|gb|AER92564.1|	ENSP00000436122|CTSB	3	GO:0006508|proteolysis; GO:0008234|cysteine-type peptidase activity; GO:0004197|cysteine-type endopeptidase activity
HRV|gi|355429265|gb|AER92564.1|	ENSP00000436159|CTSB	3	GO:0006508|proteolysis; GO:0008234|cysteine-type peptidase activity; GO:0004197|cysteine-type endopeptidase activity
HRV|gi|355429265|gb|AER92564.1|	ENSP00000436456|CTSB	3	GO:0006508|proteolysis; GO:0008234|cysteine-type peptidase activity; GO:0004197|cysteine-type endopeptidase activity
HRV|gi|355429265|gb|AER92564.1|	ENSP00000436627|CTSB	3	GO:0006508|proteolysis; GO:0008234|cysteine-type peptidase activity; GO:0004197|cysteine-type endopeptidase activity
HRV|gi|355429265|gb|AER92564.1|	ENSP00000436875|CASP1	3	GO:0006508|proteolysis; GO:0008234|cysteine-type peptidase activity; GO:0004197|cysteine-type endopeptidase activity
HRV|gi|355429265|gb|AER92564.1|	ENSP00000436877|CASP5	3	GO:0006508|proteolysis; GO:0008234|cysteine-type peptidase activity; GO:0004197|cysteine-type endopeptidase activity
HRV|gi|355429265|gb|AER92564.1|	ENSP00000441523|LONP1	3	GO:0006508|proteolysis; GO:0000166|nucleotide binding; GO:0017111|nucleoside-triphosphatase activity
HRV|gi|355429265|gb|AER92564.1|	ENSP00000442699|HTATSF1	3	GO:0019079|viral genome replication; GO:0000166|nucleotide binding; GO:0003723|RNA binding
HRV|gi|355429265|gb|AER92564.1|	ENSP00000445052|CTSL2	3	GO:0006508|proteolysis; GO:0008234|cysteine-type peptidase activity; GO:0004197|cysteine-type endopeptidase activity
HRV|gi|355429265|gb|AER92564.1|	ENSP00000445426|LONP2	3	GO:0006508|proteolysis; GO:0000166|nucleotide binding; GO:0017111|nucleoside-triphosphatase activity
HRV|gi|355429265|gb|AER92564.1|	ENSP00000447844|RDBP	3	GO:0016032|viral reproduction; GO:0000166|nucleotide binding; GO:0003723|RNA binding
HRV|gi|355429265|gb|AER92564.1|	ENSP00000447903|RDBP	3	GO:0016032|viral reproduction; GO:0000166|nucleotide binding; GO:0003723|RNA binding
HRV|gi|355429265|gb|AER92564.1|	ENSP00000449584|CASP9	3	GO:0006508|proteolysis; GO:0008234|cysteine-type peptidase activity; GO:0004197|cysteine-type endopeptidase activity
HRV|gi|355429265|gb|AER92564.1|	ENSP00000449831|ESPL1	3	GO:0006508|proteolysis; GO:0008234|cysteine-type peptidase activity; GO:0008233|peptidase activity
HRV|gi|355429265|gb|AER92564.1|	ENSP00000449897|RDBP	3	GO:0016032|viral reproduction; GO:0000166|nucleotide binding; GO:0003723|RNA binding
HRV|gi|355429265|gb|AER92564.1|	ENSP00000449910|RDBP	3	GO:0016032|viral reproduction; GO:0000166|nucleotide binding; GO:0003723|RNA binding
HRV|gi|355429265|gb|AER92564.1|	ENSP00000450250|RDBP	3	GO:0016032|viral reproduction; GO:0000166|nucleotide binding; GO:0003723|RNA binding
HRV|gi|355429265|gb|AER92564.1|	ENSP00000460380|USP6	3	GO:0006508|proteolysis; GO:0004197|cysteine-type endopeptidase activity; GO:0008233|peptidase activity
HRV|gi|355429265|gb|AER92564.1|	ENSP00000460395|CTSO	3	GO:0006508|proteolysis; GO:0008234|cysteine-type peptidase activity; GO:0004197|cysteine-type endopeptidase activity
HRV|gi|355429265|gb|AER92564.1|	ENSP00000462442|BLMH	3	GO:0006508|proteolysis; GO:0004197|cysteine-type endopeptidase activity; GO:0008233|peptidase activity
HRV|gi|61083|emb|CAA25565.1|	ENSP00000183936|CAPN3	3	GO:0006508|proteolysis; GO:0008234|cysteine-type peptidase activity; GO:0008233|peptidase activity
HRV|gi|61083|emb|CAA25565.1|	ENSP00000218364|HTATSF1	3	GO:0019079|viral genome replication; GO:0000166|nucleotide binding; GO:0003723|RNA binding
HRV|gi|61083|emb|CAA25565.1|	ENSP00000219611|SOLH	3	GO:0006508|proteolysis; GO:0008234|cysteine-type peptidase activity; GO:0008233|peptidase activity
HRV|gi|61083|emb|CAA25565.1|	ENSP00000221740|CASP14	3	GO:0006508|proteolysis; GO:0008234|cysteine-type peptidase activity; GO:0004197|cysteine-type endopeptidase activity
HRV|gi|61083|emb|CAA25565.1|	ENSP00000237865|CASP10	3	GO:0006508|proteolysis; GO:0008234|cysteine-type peptidase activity; GO:0004197|cysteine-type endopeptidase activity
HRV|gi|61083|emb|CAA25565.1|	ENSP00000250066|USP6	3	GO:0006508|proteolysis; GO:0004197|cysteine-type endopeptidase activity; GO:0008233|peptidase activity
HRV|gi|61083|emb|CAA25565.1|	ENSP00000255078|IGHMBP2	3	GO:0000166|nucleotide binding; GO:0003723|RNA binding; GO:0017111|nucleoside-triphosphatase activity
HRV|gi|61083|emb|CAA25565.1|	ENSP00000257934|ESPL1	3	GO:0006508|proteolysis; GO:0008234|cysteine-type peptidase activity; GO:0008233|peptidase activity
HRV|gi|61083|emb|CAA25565.1|	ENSP00000259470|CTSL2	3	GO:0006508|proteolysis; GO:0008234|cysteine-type peptidase activity; GO:0004197|cysteine-type endopeptidase activity
HRV|gi|61083|emb|CAA25565.1|	ENSP00000260315|CASP5	3	GO:0006508|proteolysis; GO:0008234|cysteine-type peptidase activity; GO:0004197|cysteine-type endopeptidase activity
HRV|gi|61083|emb|CAA25565.1|	ENSP00000261714|BLMH	3	GO:0006508|proteolysis; GO:0008234|cysteine-type peptidase activity; GO:0004197|cysteine-type endopeptidase activity
HRV|gi|61083|emb|CAA25565.1|	ENSP00000264274|CASP8	3	GO:0006508|proteolysis; GO:0008234|cysteine-type peptidase activity; GO:0004197|cysteine-type endopeptidase activity
HRV|gi|61083|emb|CAA25565.1|	ENSP00000264275|CASP8	3	GO:0006508|proteolysis; GO:0008234|cysteine-type peptidase activity; GO:0004197|cysteine-type endopeptidase activity
HRV|gi|61083|emb|CAA25565.1|	ENSP00000265164|CASP6	3	GO:0006508|proteolysis; GO:0008234|cysteine-type peptidase activity; GO:0004197|cysteine-type endopeptidase activity
HRV|gi|61083|emb|CAA25565.1|	ENSP00000269143|AFG3L2	3	GO:0006508|proteolysis; GO:0000166|nucleotide binding; GO:0017111|nucleoside-triphosphatase activity
HRV|gi|61083|emb|CAA25565.1|	ENSP00000271651|CTSK	3	GO:0006508|proteolysis; GO:0008234|cysteine-type peptidase activity; GO:0004197|cysteine-type endopeptidase activity
HRV|gi|61083|emb|CAA25565.1|	ENSP00000272879|CASP10	3	GO:0006508|proteolysis; GO:0008234|cysteine-type peptidase activity; GO:0004197|cysteine-type endopeptidase activity
HRV|gi|61083|emb|CAA25565.1|	ENSP00000285333|CASP6	3	GO:0006508|proteolysis; GO:0008234|cysteine-type peptidase activity; GO:0004197|cysteine-type endopeptidase activity
[truncated: 20,567 more rows]

## Sheet: RSV-Human Protein pairs
RSV virus proteins	Human proteins|Genes	Number of sharing GO terms	Sharing GO terms
[truncated: 40,499 more rows]
