# Supplementary material for: Identification of Influenza A/H7N9 Virus Infection-Related Human Genes Based on Shortest Paths in a Virus-Human Protein Interaction Network
Source: Biomed Res Int. 2014 May 18;2014:239462. doi: 10.1155/2014/239462 (PMC4052153; doi:10.1155/2014/239462)
Supplement: Supplementary file 1 — Supporting Information S1: Sequences of the 11 non-homologous influenza A/H7N9 virus proteins downloaded from NCBI protein database, with pairwise sequence identity less than 40%. Supporting Information S2: The interacting influenza A/H7N9 virus-human protein pairs with their sharing GO terms. The interacting HRV-human and RSV-human protein pairs were also included respectively. Supporting Information S3: The 3,212 Target Human Proteins interacted with influenza A/H7N9 virus proteins, found based on sharing GO terms. The Target Human Proteins interacted with HRV and RSV viruses were also included respectively. Supporting Information S4: The 962 shortest path human proteins picked out on shortest paths for influenza A/H7N9 virus. The shortest path human proteins for HRV and RSV viruses were also included respectively. Supporting Information S5: Sequences of the 4 non-homologous Human Rhinovirus (HRV) proteins downloaded from NCBI protein database, with pairwise sequence identity less than 40%. Supporting Information S6: Sequences of the 22 non-homologous Respiratory Syncytical Virus (RSV) proteins downloaded from NCBI protein database, with pairwise sequence identity less than 40%. [file 239462.f1.zip › Supporting Information/Supporting Information S3.xls]

## Sheet: H7N9 Target Human Protein list
H7N9 Target Human Protein list		Target Human proteins are human proteins interacted with A/H7N9 virus proteins based on the rule of shared GO terms (only GO terms at levels higher than 3 were considered)
Protein	Gene
ENSP00000002165	FUCA2
ENSP00000007264	RPUSD1
ENSP00000009589	RPS20
ENSP00000014112	PTBP1
ENSP00000015877	ADARB1
ENSP00000026218	PIGQ
ENSP00000028008	RNASET2
ENSP00000029410	B4GALT7
ENSP00000040877	TARBP1
ENSP00000072644	YIPF1
ENSP00000075120	SLC2A3
ENSP00000084795	RPL18
ENSP00000164139	PYGM
ENSP00000179765	BAZ2A
ENSP00000196169	TDRD3
ENSP00000196551	RPS5
ENSP00000198939	CHERP
ENSP00000199320	DIMT1
ENSP00000202773	RPL6
ENSP00000202917	OAS1
ENSP00000203616	RBM41
ENSP00000204801	CD209
ENSP00000207870	XYLB
ENSP00000209873	AAAS
ENSP00000210227	PTBP3
ENSP00000211372	RPS18
ENSP00000215793	SF3A1
ENSP00000215882	SLC25A1
ENSP00000215956	NHP2L1
ENSP00000216277	PAPOLA
ENSP00000216392	PYGL
ENSP00000216714	APEX1
ENSP00000216727	PABPN1
ENSP00000216780	PCK2
ENSP00000216962	PYGB
ENSP00000217073	PABPC1L
ENSP00000217074	PABPC1L
ENSP00000217075	PABPC1L
ENSP00000217109	CSTF1
ENSP00000217885	NOX1
ENSP00000217901	IDH3G
ENSP00000218032	TLR8
ENSP00000218200	FMR1
ENSP00000218364	HTATSF1
ENSP00000218516	GLA
ENSP00000219322	HAS3
ENSP00000220496	DNAJC17
ENSP00000220592	EIF2C2
ENSP00000220959	UBR5
ENSP00000221233	EXOSC5
ENSP00000221363	MAN2B1
ENSP00000221403	DHDH
ENSP00000221419	HNRNPL
ENSP00000221448	SNRNP70
ENSP00000221486	RNASEH2A
ENSP00000221504	TRMT1
ENSP00000221770	POP4
ENSP00000221801	FBL
ENSP00000221975	RPS19
ENSP00000222247	RPL18A
ENSP00000222286	GAPDHS
ENSP00000222574	HBP1
ENSP00000223026	HYAL4
ENSP00000223028	SPAM1
ENSP00000223073	RBM28
ENSP00000223366	GCK
ENSP00000223951	ELAVL2
ENSP00000225388	NUFIP2
ENSP00000225430	RPL19
ENSP00000225519	SHPK
ENSP00000225614	GALK1
ENSP00000225665	SLC25A11
ENSP00000225696	NUP88
ENSP00000225831	CCL2
ENSP00000226253	ALDOC
ENSP00000226578	MANBA
ENSP00000227157	LDHA
ENSP00000227163	SPI1
ENSP00000227474	PUS3
ENSP00000227503	SF1
ENSP00000228264	DDX11
ENSP00000228284	SART3
ENSP00000228843	RAD51AP1
ENSP00000228928	OAS3
ENSP00000229003	ENDOU
ENSP00000229179	NUP107
ENSP00000229214	KRR1
ENSP00000229239	GAPDH
ENSP00000229270	TPI1
ENSP00000229277	ENO2
ENSP00000229304	APOBEC1
ENSP00000229319	LDHB
ENSP00000229390	SRSF9
ENSP00000229725	NEU1
ENSP00000230301	C6orf118
ENSP00000231498	NUP155
ENSP00000232375	PFKFB4
ENSP00000232888	RRP9
ENSP00000233078	DAZAP1
ENSP00000233114	MDH1
ENSP00000233468	AC008073.5
ENSP00000233609	RPS15
ENSP00000233840	NEU2
ENSP00000234396	ATP6V1B1
ENSP00000234590	ENO1
ENSP00000234677	SARS
ENSP00000235835	AKR7A2
ENSP00000236067	ATP6V0B
ENSP00000236228	PTBP2
ENSP00000236412	PPP1R8
ENSP00000236709	A4GNT
ENSP00000237019	B4GALT6
ENSP00000238112	CPSF3
ENSP00000238146	DDX55
ENSP00000238688	SLIRP
ENSP00000238714	PAPOLG
ENSP00000240185	TARDBP
ENSP00000242351	ZC3HAV1
ENSP00000242607	HVCN1
ENSP00000243389	SLC36A1
ENSP00000243498	EXOSC9
ENSP00000243563	SNRPA
ENSP00000244020	SRSF6
ENSP00000244669	APOBEC2
ENSP00000244769	ATXN1
ENSP00000244776	DEK
ENSP00000245206	GOT2
ENSP00000245448	ATP5S
ENSP00000245539	MRPS7
ENSP00000245544	NUP85
ENSP00000245551	MIF4GD
ENSP00000245838	THOC2
ENSP00000246194	RALY
ENSP00000246314	EIF2C3
ENSP00000247001	SUGP1
ENSP00000247003	DDX49
ENSP00000247933	IDUA
ENSP00000249289	ATP6V1F
ENSP00000250113	FXR2
ENSP00000250156	MRM1
ENSP00000250241	ILF3
ENSP00000250784	RPS4Y1
ENSP00000250831	RBMY1J
ENSP00000250863	DAZL
ENSP00000251038	ZC3H14
ENSP00000251071	CAPRIN2
ENSP00000251074	NUP37
ENSP00000251453	RPS16
ENSP00000251566	UGT2A3
ENSP00000251607	TRNT1
ENSP00000251758	DDX11
ENSP00000252115	POLDIP3
ENSP00000252116	POLDIP3
ENSP00000252136	TRMT2A
ENSP00000252455	PRKCSH
ENSP00000252483	PVRL2
ENSP00000252485	PVRL2
ENSP00000252542	SAFB2
ENSP00000252603	PGLS
ENSP00000252675	FUT5
ENSP00000252816	LSM4
ENSP00000253329	PPIL4
ENSP00000253363	RBM39
ENSP00000253413	ATP6V1E1
ENSP00000253778	GFPT2
ENSP00000253801	G6PC
ENSP00000253856	ATP6V0A4
ENSP00000253952	THOC6
ENSP00000254108	FUS
ENSP00000254193	SNRPA1
ENSP00000254231	LIN28A
ENSP00000254436	TRIM21
ENSP00000254508	NUP210
ENSP00000254799	GRSF1
ENSP00000254821	ZRANB2
ENSP00000254928	ERAL1
ENSP00000254940	NIP7
ENSP00000254941	NIP7
ENSP00000254998	NXT1
ENSP00000255078	IGHMBP2
ENSP00000255136	PABPC1L
ENSP00000255409	CHI3L1
ENSP00000255427	CHIT1
ENSP00000256383	EIF2S1
ENSP00000256413	CTIF
ENSP00000256644	HBXIP
ENSP00000257075	PUM1
ENSP00000257408	KLB
ENSP00000257552	MSI1
ENSP00000257570	OASL
ENSP00000257622	POM121
ENSP00000257765	KHDC1
ENSP00000258169	MPHOSPH6
ENSP00000258383	MRPL44
ENSP00000258416	EIF4E2
ENSP00000258729	IGF2BP3
ENSP00000258742	NUPL2
ENSP00000258772	DDX56
ENSP00000258886	IREB2
ENSP00000258962	SRSF1
ENSP00000259997	CPEB2
ENSP00000260184	DDX60L
ENSP00000260318	ALKBH8
ENSP00000260598	KHK
ENSP00000260599	KHK
ENSP00000260604	PNPT1
ENSP00000260619	THUMPD2
ENSP00000260649	SLC3A1
ENSP00000260665	LRPPRC
ENSP00000260947	BARD1
ENSP00000260956	SSB
ENSP00000261195	GYS2
ENSP00000261304	GALC
ENSP00000261377	AC004381.6
ENSP00000261396	NUP133
ENSP00000261416	HEXB
ENSP00000261443	CSDE1
ENSP00000261479	PSMA6
ENSP00000261483	MAN2A1
ENSP00000261592	NOL4
ENSP00000261600	THOC1
ENSP00000261674	SFSWAP
ENSP00000261723	CPEB1
ENSP00000261733	ALDH2
ENSP00000261741	RBM19
ENSP00000261951	CNOT6
ENSP00000262030	ATP5B
ENSP00000262031	RBMS2
ENSP00000262051	SLC11A2
ENSP00000262052	SLC11A2
ENSP00000262056	EIF4B
ENSP00000262077	NUP153
ENSP00000262124	SEH1L
ENSP00000262173	RNMT
ENSP00000262238	YY1
ENSP00000262415	DHX8
ENSP00000262519	SETD1A
ENSP00000262584	RPL8
ENSP00000262633	RBM42
ENSP00000262715	TEP1
ENSP00000262794	MOV10L1
ENSP00000262803	UPF1
ENSP00000262829	RBFOX2
ENSP00000262999	UCP1
ENSP00000263032	NXF5
ENSP00000263063	MTPAP
ENSP00000263239	DDX18
ENSP00000263257	NOVA2
ENSP00000263276	GYS1
ENSP00000263576	DDX25
ENSP00000263657	PNO1
ENSP00000263736	SRBD1
ENSP00000264018	DDX6
ENSP00000264029	TREH
ENSP00000264073	ELAVL1
ENSP00000264162	LCT
ENSP00000264211	EIF4G3
ENSP00000264258	RPL31
ENSP00000264382	SI
ENSP00000264447	ZNF638
ENSP00000264584	LARP1B
ENSP00000264645	CASC3
ENSP00000264649	ATP6V0A1
ENSP00000264663	NNT
ENSP00000264717	GCKR
ENSP00000264867	PPARGC1A
ENSP00000264883	NUP54
ENSP00000264951	XRN1
ENSP00000264968	MGAT4A
ENSP00000264995	MRPL3
ENSP00000265000	GALNT7
ENSP00000265069	ZFR
ENSP00000265085	CPEB4
ENSP00000265093	ATP6V0E1
ENSP00000265097	THOC3
ENSP00000265271	RBM27
ENSP00000265351	XPO5
ENSP00000265385	IMPDH1
ENSP00000265403	UGT2B10
ENSP00000265564	EXOSC7
ENSP00000265631	SLC25A13
ENSP00000265686	TCIRG1
ENSP00000265732	RBM48
ENSP00000265753	EIF4H
ENSP00000265754	EIF4H
ENSP00000265866	HNRNPH3
ENSP00000265997	CPEB3
ENSP00000266022	RBM6
ENSP00000266031	HYAL1
ENSP00000266079	PRPF6
ENSP00000266088	SLC5A1
ENSP00000266529	ZCRB1
ENSP00000266679	CPSF6
ENSP00000266735	SNRPF
ENSP00000267197	SETD1B
ENSP00000267229	RBM26
ENSP00000267287	MBNL2
ENSP00000267422	NOVA1
ENSP00000267425	NOP9
ENSP00000267836	MYEF2
ENSP00000267884	SRP14
ENSP00000267978	MAN2C1
ENSP00000268097	HEXA
ENSP00000268164	ST8SIA2
ENSP00000268605	NOL3
ENSP00000268624	ADAD2
ENSP00000268661	RPL3L
ENSP00000268854	DDX52
ENSP00000269097	G6PC3
ENSP00000269185	NOL4
ENSP00000269848	PFKL
ENSP00000270776	PGD
ENSP00000271312	CHIA
ENSP00000271628	SF3B4
ENSP00000271764	EIF2D
ENSP00000272249	HNRPLL
ENSP00000272252	GALM
ENSP00000272298	CALM2
ENSP00000272348	SNRPG
ENSP00000272418	MRPS5
ENSP00000272444	DUSP11
ENSP00000272570	ZC3H8
ENSP00000273009	DIS3L2
ENSP00000273139	RBMS3
ENSP00000273283	ITIH1
ENSP00000273398	ATP6V1A
ENSP00000274054	NAF1
ENSP00000274242	RPL37
ENSP00000274278	UGT3A1
ENSP00000274849	ABT1
ENSP00000275262	QKI
ENSP00000275820	NOM1
ENSP00000276055	CHST7
ENSP00000276079	NONO
ENSP00000276390	ATP6V1B2
ENSP00000277165	FAM120A
ENSP00000278070	PPRC1
ENSP00000278279	TUT1
ENSP00000278572	RPS3
ENSP00000279259	FAU
ENSP00000280154	PDCD4
ENSP00000280591	TRNT1
ENSP00000280704	LDHC
ENSP00000280706	LDHAL6A
ENSP00000280892	EIF4E
ENSP00000281087	ATP6V1G3
ENSP00000281156	KHDRBS2
ENSP00000281589	PABPC3
ENSP00000281722	RBM46
ENSP00000281828	FARSB
ENSP00000282050	ATP5A1
ENSP00000282075	G6PC2
ENSP00000282278	BOLL
ENSP00000282388	ZFP36L2
ENSP00000282486	MBNL1
ENSP00000282488	MBNL1
ENSP00000282507	UGT3A2
ENSP00000282541	GPD1L
ENSP00000282641	A1CF
ENSP00000282924	JAKMIP1
ENSP00000283179	HNRNPU
ENSP00000283195	RANBP2
ENSP00000283628	UBP1
ENSP00000283629	UBP1
ENSP00000283646	RPIA
ENSP00000283977	PGM3
ENSP00000284727	ATP5G3
ENSP00000284971	ATP5J
ENSP00000285393	ATP6V0D2
ENSP00000285599	MAN2B2
ENSP00000285814	MKI67IP
ENSP00000285930	AKR1B1
ENSP00000285968	NUP205
ENSP00000286070	RBM45
ENSP00000286604	UGT2A1
ENSP00000286835	SCAF4
ENSP00000287038	RPL30
ENSP00000287202	CELF6
ENSP00000287912	RBM33
ENSP00000288071	DDX19B
ENSP00000288666	RPS4Y2
ENSP00000290239	SON
ENSP00000290299	ATP5O
ENSP00000290341	IGF2BP1
ENSP00000290573	HK2
ENSP00000290583	CELF3
ENSP00000290921	CTBP1
ENSP00000290949	ATP6V0D1
ENSP00000291295	CALM3
ENSP00000291527	TFF1
ENSP00000291552	U2AF1
ENSP00000291567	G6PD
ENSP00000292123	SAFB
ENSP00000292205	ADAR
ENSP00000292432	HK3
ENSP00000292475	ATP5J2
ENSP00000292476	CPSF4
ENSP00000292591	MGAT4B
ENSP00000292672	CELF5
ENSP00000292778	YDJC
ENSP00000292879	U2AF1L4
ENSP00000293273	RDM1
ENSP00000293842	RPL26
ENSP00000294064	NEU3
ENSP00000294172	NXF1
ENSP00000294189	RPL29
ENSP00000294428	RAVER2
ENSP00000294623	FUBP1
ENSP00000294724	AGL
ENSP00000294904	RBMS1
ENSP00000295119	NUP35
ENSP00000295228	INHBB
ENSP00000295448	GNPDA2
ENSP00000295612	EIF4E3
ENSP00000295749	CWC22
ENSP00000295759	GLB1L
ENSP00000295822	EIF5A2
ENSP00000295899	THOC7
ENSP00000295959	RPP14
ENSP00000295971	RBM47
ENSP00000296015	TTC14
ENSP00000296048	GYG1
ENSP00000296513	ADAD1
ENSP00000296575	HHIP
ENSP00000296581	LSM6
ENSP00000296820	TERT
ENSP00000296930	NPM1
ENSP00000297071	TRA2A
ENSP00000297183	ANKHD1
ENSP00000297185	HSPA9
ENSP00000297283	PGAM2
ENSP00000297373	PHKG1
ENSP00000297540	PHAX
ENSP00000297625	KIAA1161
ENSP00000297990	NOL6
ENSP00000298198	PGM2L1
ENSP00000298317	RPUSD4
ENSP00000298649	HK1
ENSP00000298717	METTL3
ENSP00000298746	TRUB1
ENSP00000298875	CPSF2
ENSP00000298892	CAPRIN2
ENSP00000299167	PHKB
ENSP00000299213	LARP6
ENSP00000299472	NOVA1
ENSP00000299518	IDH3A
ENSP00000299767	HSP90B1
ENSP00000300146	PATL1
ENSP00000300278	SON
ENSP00000300291	NUDT21
ENSP00000300413	SNRPD1
ENSP00000300688	ATP5L
ENSP00000301149	GPD1
ENSP00000301357	CD209
ENSP00000301439	AC018755.11
ENSP00000301587	ATP5H
ENSP00000301624	TNRC6C
ENSP00000301730	RNPS1
ENSP00000301740	SRRM2
ENSP00000301788	POLR2G
ENSP00000302160	LSM3
ENSP00000302194	ATP6V1G2
ENSP00000302393	LDHAL6B
ENSP00000302485	CSDC2
ENSP00000302599	FUT9
ENSP00000302728	GUSB
ENSP00000302768	PAIP1
ENSP00000302886	PA2G4
ENSP00000302896	RPS9
ENSP00000302916	JMJD6
ENSP00000302993	FIP1L1
ENSP00000303174	UGT1A6
ENSP00000303830	INSR
ENSP00000303960	ABCC8
ENSP00000304072	DDX54
ENSP00000304139	RBMXL2
ENSP00000304350	PRPF8
ENSP00000304405	HNRNPR
ENSP00000304414	CXCR6
ENSP00000304440	HAS3
ENSP00000304811	UGT2B7
ENSP00000304845	UGT1A1
ENSP00000305221	UGT2B4
ENSP00000305230	SRP9
ENSP00000305503	NUP62
ENSP00000305556	PCBP1
ENSP00000305692	GAA
ENSP00000305857	SMN1
ENSP00000305860	HNRNPD
ENSP00000305920	GLB1
ENSP00000305922	FGGY
ENSP00000306003	ATP5I
ENSP00000306080	RNMTL1
ENSP00000306117	DDX19A
ENSP00000306223	SNRPN
ENSP00000306459	B4GALT6
ENSP00000306565	ISG20
ENSP00000306759	TNRC6B
ENSP00000306920	GLB1
ENSP00000307025	ZC3H14
ENSP00000307155	RBMY1F
ENSP00000307181	FAM103A1
ENSP00000307307	EXOSC10
ENSP00000307633	FXR1
ENSP00000307774	ZNF239
ENSP00000307863	U2AF2
ENSP00000307875	B3GAT1
ENSP00000307889	RPL13
ENSP00000307911	CHST2
ENSP00000307968	NABP1
ENSP00000308000	TUT1
ENSP00000308012	PABPC5
ENSP00000308107	HPSE
ENSP00000308122	ATP6V0A4
ENSP00000308334	ATP5S
ENSP00000308386	CELF1
ENSP00000309117	RBFOX1
ENSP00000309166	RBM4
ENSP00000309175	EIF1AD
ENSP00000309270	CHST1
ENSP00000309334	RPL15
ENSP00000309438	PFKM
ENSP00000309477	ACO1
ENSP00000309479	RAD51AP1
ENSP00000309558	TAF15
ENSP00000309572	TERT
ENSP00000309574	ATP6V1G3
ENSP00000309591	PRKACA
ENSP00000309749	APOBEC3F
ENSP00000309830	RPL38
ENSP00000309965	DDX11
ENSP00000310015	ADAT1
ENSP00000310471	RBM4B
ENSP00000310539	DDX31
ENSP00000310596	LSM1
ENSP00000310668	NUP93
ENSP00000310696	B4GALT2
ENSP00000310771	GRB7
ENSP00000310998	NAGPA
ENSP00000311028	RPS14
ENSP00000311221	ZMAT3
ENSP00000311430	RPL4
ENSP00000311648	UGT8
ENSP00000311677	PPP1R8
ENSP00000311747	RBM14
ENSP00000311752	GRB7
ENSP00000311825	CTBP2
ENSP00000311876	GNPDA1
ENSP00000311888	MGAT1
ENSP00000312021	FUT1
ENSP00000312029	UCP2
ENSP00000312042	HDLBP
ENSP00000312059	AGFG1
ENSP00000312066	SRP68
ENSP00000312236	BRCA1
ENSP00000312250	ADPGK
ENSP00000312649	PPARGC1B
ENSP00000312769	PPIE
ENSP00000313007	PABPC1
ENSP00000313199	HNRNPD
ENSP00000313272	NOP2
ENSP00000313327	HNRNPD
ENSP00000313350	RNASEH1
ENSP00000313362	MAZ
ENSP00000313504	PHKB
ENSP00000313829	KHDRBS1
ENSP00000313890	RBM15B
ENSP00000313978	NOL6
ENSP00000314075	AKAP1
ENSP00000314311	LARP7
ENSP00000314348	DDX10
ENSP00000314508	GBA
ENSP00000314792	BOLL
ENSP00000314949	POLR2A
ENSP00000315017	MRPL1
ENSP00000315205	ILF3
ENSP00000315328	CELF2
ENSP00000315407	CD209
ENSP00000315477	CD209
ENSP00000315569	DIS3L2
ENSP00000315791	CSTF3
ENSP00000315859	RNPS1
ENSP00000316032	NUP98
ENSP00000316042	HNRNPA0
ENSP00000316228	CLEC4M
ENSP00000316632	GALK2
ENSP00000316879	EIF4G1
ENSP00000316950	MYEF2
ENSP00000317027	GCNT4
ENSP00000317600	EIF4G1
ENSP00000317691	RPP25
ENSP00000317788	HNRNPK
ENSP00000317904	GYS1
ENSP00000318115	TIMM50
ENSP00000318177	FUBP3
ENSP00000318192	MPI
ENSP00000318195	NCL
ENSP00000318318	MPI
ENSP00000318415	RBMXL1
ENSP00000318646	RPS15A
ENSP00000319104	SUPT6H
ENSP00000319240	MAGOHB
ENSP00000319429	MBNL1
ENSP00000319690	HNRNPC
ENSP00000319814	PCK1
ENSP00000320108	RBM47
ENSP00000320171	PKM
ENSP00000320204	IGF2BP2
ENSP00000320318	NEU4
ENSP00000320401	UGT2B17
ENSP00000320461	ASCC1
ENSP00000320503	EDC3
ENSP00000320810	ASCC1
ENSP00000320935	SLC2A4
ENSP00000320965	B4GALT3
ENSP00000321179	RBM44
ENSP00000321259	TALDO1
ENSP00000321343	ST8SIA5
ENSP00000321449	RRP7A
ENSP00000321583	DIS3L
ENSP00000321584	IMPDH2
ENSP00000321625	MIF4GD
ENSP00000321711	DIS3L
ENSP00000321997	LARP1B
ENSP00000322016	PUF60
ENSP00000322036	PUF60
ENSP00000322234	SYNJ1
ENSP00000322341	PCBP4
ENSP00000322376	U2SURP
ENSP00000322419	RPLP2
ENSP00000323046	EXOSC3
ENSP00000323288	RPUSD2
ENSP00000323353	UEVLD
ENSP00000323568	SLC2A2
ENSP00000323714	EIF4E1B
ENSP00000323737	EIF4G1
ENSP00000323740	UCP3
ENSP00000323750	RAD51AP1
ENSP00000323858	DDX54
ENSP00000324105	ENO3
ENSP00000324122	PRPF31
ENSP00000324203	WRAP53
ENSP00000324328	TRDMT1
ENSP00000324726	PUS1
ENSP00000324821	CHID1
ENSP00000324827	AKAP17A
ENSP00000325055	CHID1
ENSP00000325153	ADAD2
ENSP00000325376	HNRNPM
ENSP00000325732	HNRNPM
ENSP00000325905	SRSF7
ENSP00000326003	PUS10
ENSP00000326128	LARP4B
ENSP00000326227	GANC
ENSP00000326261	SRRM1
ENSP00000326531	THOC6
ENSP00000326674	PIGQ
ENSP00000326731	CNOT4
ENSP00000326746	PUM2
ENSP00000326777	MTHFSD
ENSP00000326900	TNRC6A
ENSP00000326981	IMP3
ENSP00000327070	MDH2
ENSP00000327080	RBM26
ENSP00000327176	ZC3H14
ENSP00000327456	EWSR1
ENSP00000327459	APOBEC3B
ENSP00000327943	SLC5A2
ENSP00000328403	SLC25A10
ENSP00000328690	DDX24
ENSP00000328848	RBM10
ENSP00000328983	CHST6
ENSP00000329592	UPF3A
ENSP00000329659	RBM10
ENSP00000329757	ATP6V0C
ENSP00000329918	MEX3B
ENSP00000329968	PHKG2
ENSP00000330031	PIWIL3
ENSP00000330349	DDX41
ENSP00000330460	DDX59
ENSP00000330484	AMY1B
ENSP00000330601	HHIPL1
ENSP00000330918	PGP
ENSP00000331211	RBM43
ENSP00000331327	WT1
ENSP00000331471	NXF2
ENSP00000331535	NXF5
ENSP00000331664	MGAT4C
ENSP00000331817	ALYREF
ENSP00000331831	GAS6
ENSP00000331897	IDH2
ENSP00000331907	DHX34
ENSP00000332073	MGAT1
ENSP00000332247	ATP6V0A2
ENSP00000332265	ANKRD17
ENSP00000332340	DDX28
ENSP00000332373	SUGP2
ENSP00000332444	CSTF2T
ENSP00000332634	HEXDC
ENSP00000333001	RBM8A
ENSP00000333837	MRPL12
ENSP00000334032	SUGP1
ENSP00000334058	CPEB2
ENSP00000334223	SLC36A2
ENSP00000334276	UGT2B28
ENSP00000334346	TERT
ENSP00000334414	SF1
ENSP00000334499	PTBP3
ENSP00000334533	CPEB4
ENSP00000334918	FAM120A
ENSP00000334983	PKM
ENSP00000336543	SNURF
ENSP00000336702	EIF5A
ENSP00000336721	LARP1
ENSP00000336725	DDX3Y
ENSP00000336752	FIP1L1
ENSP00000336776	EIF5A
ENSP00000336927	ALDOA
ENSP00000337132	DAZAP1
ENSP00000337425	HYAL3
ENSP00000337632	SARNP
ENSP00000337736	AKAP1
ENSP00000337854	HEXDC
ENSP00000337926	SUGP2
ENSP00000338002	ZC3H14
ENSP00000338009	GCK
ENSP00000338020	EIF4G1
ENSP00000338095	HNRNPC
ENSP00000338143	SUPT6H
ENSP00000338173	PUM2
ENSP00000338371	TNRC6B
ENSP00000338477	HNRNPF
ENSP00000338487	MGAT4B
ENSP00000338615	CTBP2
ENSP00000338703	UGP2
ENSP00000338783	CHST5
ENSP00000338838	CHID1
ENSP00000338897	APOBEC3B
ENSP00000338970	CHIA
ENSP00000339027	RPLP0
ENSP00000339090	RBMX2
ENSP00000339095	RPS7
ENSP00000339220	RBM23
ENSP00000339404	ASCC1
ENSP00000339532	THUMPD3
ENSP00000339622	PAIP1
ENSP00000339795	RPL7
ENSP00000339845	DROSHA
ENSP00000339933	PKLR
ENSP00000340281	EIF4G2
ENSP00000340315	ATP5G2
ENSP00000340329	CAPRIN1
ENSP00000340466	GANAB
ENSP00000340584	ZBP1
ENSP00000340705	PTBP3
ENSP00000340734	GUSB
ENSP00000340736	GYG1
ENSP00000340774	SNRNP35
ENSP00000340815	SLC3A2
ENSP00000340857	HNRNPUL1
ENSP00000340940	PRKACA
ENSP00000341021	NANOS2
ENSP00000341045	UGT2B15
ENSP00000341125	OASL
ENSP00000341168	NPM1
ENSP00000341206	CHST4
ENSP00000341273	GYG2
ENSP00000341285	HNRNPA1L2
ENSP00000341562	B4GALNT1
ENSP00000341583	RBM33
ENSP00000341660	MRPS5
ENSP00000341689	ZNF239
ENSP00000341826	HNRNPA1
ENSP00000341828	CHIA
ENSP00000341885	RPS2
ENSP00000341992	NANOS3
ENSP00000342032	BPGM
ENSP00000342056	CS
ENSP00000342118	HHIPL2
ENSP00000342262	NUP43
ENSP00000342278	OAS2
ENSP00000342332	PTBP1
ENSP00000342387	NOVA1
ENSP00000342408	CSDE1
ENSP00000342438	IMPDH1
ENSP00000342469	PHKA1
ENSP00000342787	RPL28
ENSP00000342838	INSR
ENSP00000342913	SRSF10
ENSP00000342951	ATP6V0A1
ENSP00000343034	POMT1
ENSP00000343054	RBM5
ENSP00000343081	PUS7L
ENSP00000343450	EIF4G1
ENSP00000343488	EARS2
ENSP00000343490	LCTL
ENSP00000343557	ZCCHC17
ENSP00000343745	DICER1
ENSP00000343782	ADRB3
ENSP00000343838	UGT1A10
ENSP00000343869	LARP6
ENSP00000343873	NNT
ENSP00000343900	CPSF4L
ENSP00000343966	PSPC1
ENSP00000344052	NUP54
ENSP00000344149	SRSF10
ENSP00000344196	RBFOX1
ENSP00000344214	MBNL2
ENSP00000344230	ATP5H
ENSP00000344338	DPM3
ENSP00000344401	LIN28B
ENSP00000344581	RBM39
ENSP00000344659	GLB1L2
ENSP00000344698	FAM120A
ENSP00000344950	LARP7
ENSP00000344954	ZBP1
ENSP00000345096	IMPDH1
ENSP00000345156	RPL14
ENSP00000345412	CPSF7
ENSP00000345456	PARN
ENSP00000345580	SLC25A10
ENSP00000345771	PFKM
ENSP00000345849	SPAM1
ENSP00000345895	NUP50
ENSP00000345924	NANOS1
ENSP00000346001	RPL3
ENSP00000346015	RPL27A
ENSP00000346022	RPL9
ENSP00000346027	RPL21
ENSP00000346037	RPLP1
ENSP00000346050	RPS3A
ENSP00000346068	HYAL1
ENSP00000346088	RPL22
ENSP00000346120	DDX21
ENSP00000346219	IMPDH1
ENSP00000346236	DDX46
ENSP00000346373	CD209
ENSP00000346426	CELF2
ENSP00000346444	LARP1B
ENSP00000346501	RPE
ENSP00000346643	HKDC1
ENSP00000346694	HNRNPA2B1
ENSP00000346726	HNRNPH3
ENSP00000346748	POMT1
ENSP00000346768	UGT1A9
ENSP00000346867	RPL15
ENSP00000346917	MOV10L1
ENSP00000346971	CELF2
ENSP00000347380	SYNCRIP
ENSP00000347401	NHP2L1
ENSP00000347404	NUP98
ENSP00000347637	MBNL1
ENSP00000347792	SYNJ2
ENSP00000347855	RBFOX1
ENSP00000347897	RSL1D1
ENSP00000347907	FNBP1
ENSP00000347959	THOC2
ENSP00000348003	GAS6
ENSP00000348026	STAU2
ENSP00000348066	ZNF638
ENSP00000348093	HNRNPAB
ENSP00000348107	C1D
ENSP00000348108	KHDRBS3
ENSP00000348111	PCBP4
ENSP00000348205	ATP5G1
ENSP00000348271	DDX19B
ENSP00000348345	HNRNPF
ENSP00000348485	CNOT4
ENSP00000348578	G3BP1
ENSP00000348628	GLB1L
ENSP00000348708	UPF2
ENSP00000348722	PUS7
ENSP00000348877	GPI
ENSP00000348904	PPIE
ENSP00000348984	SON
ENSP00000349053	GANAB
ENSP00000349098	ZNF74
ENSP00000349101	HNRNPA2B1
ENSP00000349168	HNRNPH1
ENSP00000349181	HVCN1
ENSP00000349293	B4GALT2
ENSP00000349428	PTBP1
ENSP00000349467	CALM1
ENSP00000349573	HNRNPF
ENSP00000349594	ELAVL4
ENSP00000349748	SFPQ
ENSP00000349757	HHIPL1
ENSP00000349860	GFPT1
ENSP00000349903	SYNJ1
ENSP00000349924	CLEC4M
ENSP00000349962	GAS6
ENSP00000350028	MOV10
ENSP00000350064	MBNL1
ENSP00000350090	HNRNPA1L2
ENSP00000350170	FXR1
ENSP00000350221	UPF2
ENSP00000350283	BRCA1
ENSP00000350352	TRMT1
ENSP00000350387	HYAL2
ENSP00000350409	UNC50
ENSP00000350518	G3BP2
ENSP00000350698	DDX47
ENSP00000350820	MTPAP
ENSP00000350877	SRSF2
ENSP00000351021	RPL21
ENSP00000351027	TRDMT1
ENSP00000351108	HNRNPAB
ENSP00000351124	POM121
ENSP00000351136	HNRPLL
ENSP00000351288	PFKFB3
ENSP00000351329	CSDE1
ENSP00000351409	CELF1
ENSP00000351416	ANKRD17
ENSP00000351602	FUT4
ENSP00000351706	GK2
ENSP00000351723	NOL8
ENSP00000351946	HYAL3
ENSP00000351954	CLEC4M
ENSP00000352091	NUP98
ENSP00000352144	B4GALT4
ENSP00000352162	ELAVL3
ENSP00000352228	PCBP2
ENSP00000352250	ZC3H14
ENSP00000352308	DDX42
ENSP00000352328	RBFOX2
ENSP00000352398	HK1
ENSP00000352400	NUP214
ENSP00000352401	RPE
ENSP00000352438	PCBP2
ENSP00000352516	DNMT1
ENSP00000352612	ELAVL2
ENSP00000352668	RBM12
ENSP00000352678	SUPV3L1
ENSP00000352738	G3BP2
ENSP00000352842	PFKM
ENSP00000352911	NUDT16
ENSP00000352956	RBM23
ENSP00000353089	SRSF2
ENSP00000353284	DDX3Y
ENSP00000353433	HK1
ENSP00000353552	HNRNPK
ENSP00000353584	DIS3L2
ENSP00000353593	UGT1A1
ENSP00000353638	PPARGC1B
ENSP00000353655	MAN2A2
ENSP00000353663	RBM42
ENSP00000353712	PFKFB3
ENSP00000353741	ETF1
ENSP00000353769	SCAF1
ENSP00000353920	ADARB1
ENSP00000354021	HNRNPA2B1
ENSP00000354085	ANKHD1
ENSP00000354125	EIF3B
ENSP00000354152	MTHFSD
ENSP00000354346	MATR3
ENSP00000354347	GFPT1
ENSP00000354370	PUM2
ENSP00000354437	RBM39
ENSP00000354539	NXF5
ENSP00000354580	MRPL21
ENSP00000354610	AMY2B
ENSP00000354632	MT-ATP6
ENSP00000354635	AGL
ENSP00000354639	CELF1
ENSP00000354673	CNOT4
ENSP00000354722	EIF1AY
ENSP00000354739	RPL12
ENSP00000354867	QKI
ENSP00000354951	QKI
ENSP00000354971	AGL
ENSP00000355011	ILF2
ENSP00000355028	DZIP3
ENSP00000355094	QKI
ENSP00000355106	AGL
ENSP00000355115	FMR1
ENSP00000355265	J01415.25
ENSP00000355273	ST6GAL2
ENSP00000355279	CNOT7
ENSP00000355286	NXF5
ENSP00000355315	RPL39
ENSP00000355565	RBM34
ENSP00000355804	SRP9
ENSP00000355890	EPRS
ENSP00000356046	PFKFB2
ENSP00000356047	PFKFB2
ENSP00000356079	SYNJ2
ENSP00000356081	EIF2D
ENSP00000356088	SYNJ2
ENSP00000356146	SCAF8
ENSP00000356198	CHIT1
ENSP00000356351	ATP6V1G3
ENSP00000356352	ATP6V1G3
ENSP00000356411	TROVE2
ENSP00000356413	TROVE2
ENSP00000356414	TROVE2
ENSP00000356415	TROVE2
ENSP00000356416	TROVE2
ENSP00000356448	TPR
ENSP00000356474	TRMT1L
ENSP00000356476	TRMT1L
ENSP00000356530	RNASEL
ENSP00000356557	FUCA2
ENSP00000356977	B4GALT3
ENSP00000357357	GBA
ENSP00000357384	DPM3
ENSP00000357385	DPM3
ENSP00000357456	ADAR
ENSP00000357459	ADAR
ENSP00000357465	TDRD10
ENSP00000357467	TDRD10
ENSP00000357670	ILF2
ENSP00000357673	ILF2
ENSP00000357676	CHTOP
ENSP00000357679	CHTOP
ENSP00000357683	CHTOP
ENSP00000357812	TDRKH
ENSP00000357813	TDRKH
ENSP00000357815	TDRKH
ENSP00000357817	TDRKH
ENSP00000357819	TDRKH
ENSP00000358089	TIAL1
ENSP00000358313	RBM8A
ENSP00000358532	RBM20
ENSP00000358563	DKC1
ENSP00000358565	SLC35A1
ENSP00000358569	SLC35A1
ENSP00000358605	SMNDC1
ENSP00000358616	SMNDC1
ENSP00000358633	G6PD
ENSP00000358635	SYNCRIP
ENSP00000358659	MOV10
ENSP00000358719	ME1
ENSP00000358737	ATP5F1
ENSP00000358747	OVGP1
ENSP00000358755	CHIA
ENSP00000358759	CHI3L2
ENSP00000358763	CHI3L2
ENSP00000358777	ATP6AP1
ENSP00000358799	RBM15
ENSP00000358812	PDCD11
ENSP00000359029	PPRC1
ENSP00000359048	HENMT1
ENSP00000359049	HENMT1
ENSP00000359096	AMY1C
ENSP00000359097	AMY1B
ENSP00000359100	AMY1A
ENSP00000359146	RTCA
ENSP00000359180	AGL
ENSP00000359182	AGL
ENSP00000359184	AGL
ENSP00000359216	PTBP2
ENSP00000359217	PTBP2
ENSP00000359345	RPL5
ENSP00000359361	DDX43
ENSP00000359384	OOEP
ENSP00000359396	DPPA5
ENSP00000359411	KHDC1
ENSP00000359501	FMR1
ENSP00000359502	FMR1
ENSP00000359506	FMR1
ENSP00000359508	FMR1
ENSP00000359539	GOT1
ENSP00000359577	HPSE2
ENSP00000359580	HPSE2
ENSP00000359583	HPSE2
ENSP00000359645	RBMX
ENSP00000359664	CTBS
ENSP00000359688	RPF1
ENSP00000359690	RPF1
ENSP00000359716	PRKACB
ENSP00000359719	PRKACB
ENSP00000359722	PRKACB
ENSP00000359723	PRKACB
ENSP00000359803	FUBP1
ENSP00000359804	FUBP1
ENSP00000359939	EXOSC1
ENSP00000359958	ZRANB2
ENSP00000359988	SRSF11
ENSP00000359989	SRSF11
ENSP00000359991	PGAM1
ENSP00000360112	RAVER2
ENSP00000360124	PGM1
ENSP00000360125	PGM1
ENSP00000360215	ZBP1
ENSP00000360231	NFIA
ENSP00000360254	FGGY
ENSP00000360256	FGGY
ENSP00000360262	FGGY
ENSP00000360286	RAE1
ENSP00000360365	MCTS1
ENSP00000360367	MCTS1
ENSP00000360525	MAGOH
ENSP00000360532	CDC5L
ENSP00000360776	B4GALT5
ENSP00000360829	GLT6D1
ENSP00000360884	ELAVL4
ENSP00000360886	ELAVL4
ENSP00000360888	ELAVL4
ENSP00000360889	ELAVL4
ENSP00000360892	ELAVL4
ENSP00000360922	STAU1
ENSP00000361047	ALG13
ENSP00000361076	RPL7A
ENSP00000361092	SURF6
ENSP00000361106	GBGT1
ENSP00000361108	GBGT1
ENSP00000361110	GBGT1
ENSP00000361113	GBGT1
ENSP00000361226	DDX31
ENSP00000361228	DDX31
ENSP00000361232	DDX31
ENSP00000361302	POMT1
ENSP00000361399	B4GALT2
ENSP00000361451	FUBP3
ENSP00000361493	FNBP1
ENSP00000361512	PRPS1
ENSP00000361557	RBM41
ENSP00000361565	RBM41
ENSP00000361626	YBX1
ENSP00000361658	NUP188
ENSP00000361835	NXF2B
ENSP00000361836	NXF2B
ENSP00000361838	NXF2B
ENSP00000361843	NXF2
ENSP00000361844	NXF2
ENSP00000361849	NXF2
ENSP00000361889	NXF5
ENSP00000361906	PABPC1L
ENSP00000361909	PABPC1L
ENSP00000361911	PABPC1L
ENSP00000361913	PABPC1L
ENSP00000361918	PPIE
ENSP00000361927	HNRNPH2
ENSP00000361947	PABPC4
ENSP00000361948	PABPC4
ENSP00000361949	PABPC4
ENSP00000361953	PABPC4
ENSP00000361982	TRUB2
ENSP00000362057	NOX1
ENSP00000362063	CSTF2
ENSP00000362193	ASCC1
ENSP00000362207	CHST3
ENSP00000362287	EIF2C3
ENSP00000362300	EIF2C1
ENSP00000362306	EIF2C4
ENSP00000362389	HDLBP
ENSP00000362413	PGK1
ENSP00000362463	GLO1
ENSP00000362469	SLC2A8
ENSP00000362508	UGT1A4
ENSP00000362513	UGT1A5
ENSP00000362523	UGT1A6
ENSP00000362525	UGT1A7
ENSP00000362544	UGT1A10
ENSP00000362549	UGT1A8
ENSP00000362618	PABPC1L2A
ENSP00000362621	PABPC1L2B
ENSP00000362643	PHKA1
ENSP00000362687	DDX50
ENSP00000362729	RPS4X
ENSP00000362744	RPS4X
ENSP00000362775	AGFG1
ENSP00000362819	ZCCHC17
ENSP00000362820	SRSF3
ENSP00000362846	PUM1
ENSP00000362847	PUM1
ENSP00000362852	PUM1
ENSP00000362900	SRSF4
ENSP00000362936	TRNAU1AP
ENSP00000362947	NONO
ENSP00000362963	NONO
ENSP00000362993	BICC1
ENSP00000363018	RPL10A
ENSP00000363042	PPP1R8
ENSP00000363095	TRIM32
ENSP00000363105	A1CF
ENSP00000363107	A1CF
ENSP00000363109	A1CF
ENSP00000363113	A1CF
ENSP00000363150	RBM39
ENSP00000363162	ATP6V1G1
ENSP00000363217	RBM12
ENSP00000363228	RBM12
ENSP00000363314	LIN28A
ENSP00000363373	PTBP3
ENSP00000363375	PTBP3
ENSP00000363516	RCAN3
ENSP00000363533	MDH1B
ENSP00000363569	ZNF239
ENSP00000363573	BX511012.1
ENSP00000363576	SRSF10
ENSP00000363603	FUCA1
ENSP00000363621	GALE
ENSP00000363676	RPL11
ENSP00000363741	HNRNPR
ENSP00000363745	HNRNPR
ENSP00000363988	ALDOB
ENSP00000364071	EIF4G3
ENSP00000364073	EIF4G3
ENSP00000364119	EIF2S2
ENSP00000364145	PFKFB1
ENSP00000364255	RALY
ENSP00000364272	NCBP1
ENSP00000364289	NCBP1
ENSP00000364448	UPF3A
ENSP00000364475	FBP1
ENSP00000364486	FBP2
ENSP00000364512	G6PC2
ENSP00000364538	FAM120A
ENSP00000364543	SKIV2L
ENSP00000364574	RDBP
ENSP00000364578	RDBP
ENSP00000364639	RBM7
ENSP00000364782	NEU1
ENSP00000364883	AUH
ENSP00000364912	SPEN
ENSP00000365321	ATP6V1G2
ENSP00000365356	ATP6V1G2-DDX39B
ENSP00000365370	HNRNPCL1
ENSP00000365432	HNRNPK
ENSP00000365439	HNRNPK
ENSP00000365440	HNRNPK
ENSP00000365444	HNRNPK
ENSP00000365458	HNRNPK
ENSP00000365601	IDNK
ENSP00000365694	PPP1R10
ENSP00000365837	PUS1
ENSP00000365861	MBNL2
ENSP00000365946	RBM3
ENSP00000365950	RBM3
ENSP00000366135	EXOSC10
ENSP00000366488	PRKACG
ENSP00000366519	NSUN6
ENSP00000366549	ST3GAL5
ENSP00000366557	CRNKL1
ENSP00000366604	SF1
ENSP00000366607	SF1
ENSP00000366611	SF1
ENSP00000366620	H6PD
ENSP00000366631	SLC2A5
ENSP00000366641	SLC2A5
ENSP00000366650	PYGM
ENSP00000366829	RBM10
ENSP00000366843	ATXN2
ENSP00000366927	ALDH1B1
ENSP00000366934	NOL9
ENSP00000366997	DIS3
ENSP00000367011	DIS3
ENSP00000367030	TRDMT1
ENSP00000367033	ZNF638
ENSP00000367113	TDRD3
ENSP00000367121	SLC3A2
ENSP00000367122	SLC3A2
ENSP00000367123	SLC3A2
ENSP00000367124	SLC3A2
ENSP00000367126	TDRD3
ENSP00000367460	HNRNPUL1
ENSP00000367498	LRRC47
ENSP00000367609	PABPN1L
ENSP00000367721	NUP160
ENSP00000367799	SPI1
ENSP00000368001	THUMPD2
ENSP00000368119	GALT
ENSP00000368195	HNRPLL
ENSP00000368221	GK
ENSP00000368224	GK
ENSP00000368226	GK
ENSP00000368228	GK
ENSP00000368229	GK
ENSP00000368253	NR0B1
ENSP00000368258	U2AF1L4
ENSP00000368318	PUSL1
ENSP00000368368	WT1
ENSP00000368370	WT1
ENSP00000368437	KIAA1161
ENSP00000368459	NUFIP1
ENSP00000368470	UPF2
ENSP00000368563	CELF2
ENSP00000368667	DDX53
ENSP00000368697	UEVLD
ENSP00000368722	LDHA
ENSP00000368754	BAZ2A
ENSP00000368783	NOL6
ENSP00000368784	NOL6
ENSP00000368881	KIN
ENSP00000368912	EIF1AX
ENSP00000368927	EIF1AX
ENSP00000368984	EXOSC9
ENSP00000369055	B4GALT1
ENSP00000369100	PFKFB3
ENSP00000369218	RBM17
ENSP00000369255	ACO1
ENSP00000369274	PHKA2
ENSP00000369396	SLC4A11
ENSP00000369399	SLC4A11
ENSP00000369442	KL
ENSP00000369453	ELAVL2
ENSP00000369460	ELAVL2
ENSP00000369594	FUS
ENSP00000369629	U2AF1
ENSP00000369887	SLTM
ENSP00000370083	SMN1
ENSP00000370117	SMN2
ENSP00000370118	SMN2
ENSP00000370119	SMN2
ENSP00000370486	UGT2B4
ENSP00000370517	PFKP
ENSP00000370532	GTF3A
ENSP00000370549	GYG2
ENSP00000370555	GYG2
ENSP00000370569	RPL21
ENSP00000370574	RPL21
ENSP00000370589	NOP56
ENSP00000370660	AKAP17A
ENSP00000370706	ADARB2
ENSP00000370711	ADARB2
ENSP00000370713	ADARB2
ENSP00000370930	MRPL23
ENSP00000370977	APOBEC3F
ENSP00000371095	SON
ENSP00000371111	SON
ENSP00000371155	NUPL1
ENSP00000371212	RBM47
ENSP00000371214	RBM47
ENSP00000371265	NUP155
ENSP00000371381	NAGPA
ENSP00000371393	PGM2
ENSP00000371634	IGF2BP2
ENSP00000371743	DAZ2
ENSP00000371767	EIF4G1
ENSP00000371802	DAZ3
ENSP00000371832	CPEB2
ENSP00000371838	CPEB2
ENSP00000371858	NOP2
ENSP00000371870	DAZ2
ENSP00000371887	DAZ2
ENSP00000371931	SYNJ1
ENSP00000372027	TTC14
ENSP00000372104	RBMY1E
ENSP00000372105	RBMY1E
ENSP00000372119	RBMY1E
ENSP00000372124	RBMY1D
ENSP00000372127	RBMY1D
ENSP00000372222	EIF1AY
ENSP00000372411	CTBP1
ENSP00000372459	CTIF
ENSP00000372484	RBMY1B
ENSP00000372613	B4GALT6
ENSP00000372660	RDBP
ENSP00000372804	RNMT
ENSP00000372827	SKIV2L
ENSP00000372834	RDBP
ENSP00000372995	ATP6V1G2
ENSP00000373080	PPP1R10
ENSP00000373276	RBMS3
ENSP00000373277	RBMS3
ENSP00000373331	RPUSD3
ENSP00000373376	ADAD1
ENSP00000373377	ADAD1
ENSP00000373401	HNRNPL
ENSP00000373402	HNRNPL
ENSP00000373476	MEX3D
ENSP00000373518	NOX5
ENSP00000373715	DCP2
ENSP00000373745	PKM
ENSP00000374219	ALKBH8
ENSP00000374296	CAPRIN1
ENSP00000374467	ABCC8
ENSP00000374476	EIF4E3
ENSP00000374511	ADARB1
ENSP00000374513	ADARB1
ENSP00000374531	GLB1L2
ENSP00000374537	GLB1L3
ENSP00000374574	DDX42
ENSP00000374655	DIS3L2
ENSP00000374665	GAA
ENSP00000375079	CHST6
ENSP00000375105	SNRPN
ENSP00000375133	ZRSR1
ENSP00000375632	RPS9
ENSP00000375633	RPS9
ENSP00000375748	FUT2
ENSP00000375785	CALM3
ENSP00000375830	NEU4
ENSP00000375836	HDLBP
ENSP00000375837	HDLBP
ENSP00000375863	HNRNPUL1
ENSP00000375939	GLB1L
ENSP00000375973	QKI
ENSP00000376049	MDH1B
ENSP00000376104	POP4
ENSP00000376116	BOLL
ENSP00000376176	RAN
ENSP00000376214	PKLR
ENSP00000376276	SRSF2
ENSP00000376299	RPLP0
ENSP00000376309	HNRNPA3
ENSP00000376320	EIF4G1
ENSP00000376324	ATP5G3
ENSP00000376344	RBM19
ENSP00000376359	B3GAT1
ENSP00000376362	OAS2
ENSP00000376465	GALNT3
ENSP00000376508	RBMS1
ENSP00000376548	GALNTL5
ENSP00000376707	XRN1
ENSP00000376716	PAPOLA
ENSP00000376774	ATP6V0A4
ENSP00000376783	DICER1
ENSP00000376811	RPL13
ENSP00000376840	BPGM
ENSP00000376900	MGAT4C
ENSP00000377010	MGAT1
ENSP00000377024	CNOT6
ENSP00000377033	ATP5G1
ENSP00000377082	HNRNPH1
ENSP00000377127	MGAT4A
ENSP00000377150	ZC3H14
ENSP00000377192	G6PD
ENSP00000377194	G6PD
ENSP00000377198	GALC
ENSP00000377199	GALC
ENSP00000377267	DDX19B
ENSP00000377294	BRCA1
ENSP00000377344	DDX60
ENSP00000377360	B4GALT4
ENSP00000377394	ST3GAL5
ENSP00000377397	ST3GAL5
ENSP00000377408	NPM1
ENSP00000377415	ATP6V0A1
ENSP00000377527	PC
ENSP00000377530	PC
ENSP00000377532	PC
ENSP00000377548	RBM14
ENSP00000377640	RPL24
ENSP00000377681	G3BP1
ENSP00000377716	CD209
ENSP00000377738	PTBP2
ENSP00000377740	ATP5J2
ENSP00000377754	GRB7
ENSP00000377759	GRB7
ENSP00000377760	CPEB3
ENSP00000377761	GRB7
ENSP00000377829	LARP1B
ENSP00000377855	PPARGC1B
ENSP00000377878	ATP5G2
ENSP00000377892	SRSF5
ENSP00000377908	AAAS
ENSP00000377939	UGP2
ENSP00000377945	MDH1
ENSP00000377971	ANKLE1
ENSP00000378019	UGT8
ENSP00000378035	RDM1
ENSP00000378037	RDM1
ENSP00000378160	RPL34
ENSP00000378162	RPL34
ENSP00000378163	RPL34
ENSP00000378211	ANKHD1
ENSP00000378212	ANKHD1
ENSP00000378260	ALG13
ENSP00000378284	MATR3
ENSP00000378314	PRKACB
ENSP00000378352	CPSF7
ENSP00000378364	SLC11A2
ENSP00000378373	ASCC1
ENSP00000378377	ASCC1
ENSP00000378378	RPL8
ENSP00000378396	RPL23A
ENSP00000378460	PCBP4
ENSP00000378461	PCBP4
ENSP00000378504	NXF3
ENSP00000378521	HKDC1
ENSP00000378523	NXF2
ENSP00000378571	HYAL2
ENSP00000378575	HYAL1
ENSP00000378576	HYAL1
ENSP00000378656	PFKM
ENSP00000378661	ALDOA
ENSP00000378669	ALDOA
ENSP00000378677	CELF6
ENSP00000378705	CELF1
ENSP00000378706	CELF1
ENSP00000378731	ALDOC
ENSP00000378868	A1CF
ENSP00000378873	A1CF
ENSP00000379069	G3BP2
ENSP00000379142	GCK
ENSP00000379144	TNRC6A
ENSP00000379150	CAPRIN2
ENSP00000379167	ZBP1
ENSP00000379181	RAE1
ENSP00000379182	RAE1
ENSP00000379184	MOV10L1
ENSP00000379193	MOV10L1
ENSP00000379203	ATP6V1C1
ENSP00000379353	ST8SIA1
ENSP00000379377	GCNT3
ENSP00000379385	LDHB
ENSP00000379386	LDHB
ENSP00000379403	NUP50
ENSP00000379500	UEVLD
ENSP00000379506	RPL14
ENSP00000379516	LDHAL6A
ENSP00000379524	LDHA
ENSP00000379654	KIAA0430
ENSP00000379674	PGM5
ENSP00000379675	PSMA1
ENSP00000379676	PSMA1
ENSP00000379678	PGM5
ENSP00000379680	NAGA
ENSP00000379727	WRAP53
ENSP00000379760	RSL1D1
ENSP00000379766	GALK2
ENSP00000379775	EXOSC3
ENSP00000379778	EIF4G2
ENSP00000379828	RBMS3
ENSP00000379933	TPI1
ENSP00000380020	NOP9
ENSP00000380068	GAPDH
ENSP00000380070	GAPDH
ENSP00000380171	PCK2
ENSP00000380199	NUP98
ENSP00000380202	NUP98
ENSP00000380206	EIF3B
ENSP00000380244	UPF2
ENSP00000380275	RNPS1
ENSP00000380414	DEK
ENSP00000380446	PABPN1
ENSP00000380466	MRPL23
ENSP00000380470	RBFOX2
ENSP00000380479	ELAVL2
ENSP00000380495	DDX51
ENSP00000380511	HAGH
ENSP00000380514	HAGH
ENSP00000380687	NANOS3
ENSP00000380726	MBNL2
ENSP00000380750	JMJD6
ENSP00000380780	ATHL1
ENSP00000380969	THOC5
ENSP00000380970	THOC5
ENSP00000380971	THOC5
ENSP00000380982	KIAA0020
ENSP00000381027	U2SURP
ENSP00000381031	EWSR1
ENSP00000381111	APEX1
ENSP00000381119	HNRNPA1L2
ENSP00000381205	U2AF1
ENSP00000381216	KHSRP
ENSP00000381271	WIBG
ENSP00000381490	LARP4
ENSP00000381591	CPEB1
ENSP00000381680	RBM4
ENSP00000381736	ATP5A1
ENSP00000381786	GYG2
ENSP00000381847	YDJC
ENSP00000382239	RBM12B
ENSP00000382333	GLB1
ENSP00000382373	DAZL
ENSP00000382392	NOP2
ENSP00000382696	ATP6V1E1
ENSP00000382703	SCAF4
ENSP00000382743	CELF2
ENSP00000382779	SEH1L
ENSP00000382806	RBM23
ENSP00000382840	DDX3X
ENSP00000382959	ATP5J
ENSP00000382962	ATP5J
ENSP00000382965	ATP5J
ENSP00000382966	ATP5J
ENSP00000382969	SNRPN
ENSP00000382970	SNRPN
ENSP00000382971	ATP5J
ENSP00000382972	SNRPN
ENSP00000383159	PCBP3
ENSP00000383160	PCBP3
ENSP00000383163	PCBP3
ENSP00000383164	PCBP3
ENSP00000383165	PCBP3
ENSP00000383168	PCBP3
ENSP00000383274	EIF4G3
ENSP00000383301	ZNF74
ENSP00000383421	RBM11
ENSP00000383752	TROVE2
ENSP00000383937	RPS9
ENSP00000383949	NHP2L1
ENSP00000383989	NHP2L1
ENSP00000384008	ANKLE1
ENSP00000384038	PFKL
ENSP00000384159	CWC22
ENSP00000384160	RBM33
ENSP00000384247	GCK
ENSP00000384262	HPSE
ENSP00000384304	C1D
ENSP00000384357	SRSF11
ENSP00000384384	HPSE2
ENSP00000384398	MEX3D
ENSP00000384403	PPARGC1B
ENSP00000384408	PARG
ENSP00000384523	NFIA
ENSP00000384531	POMT1
ENSP00000384541	RBM39
ENSP00000384573	DAZ1
ENSP00000384589	ITIH1
ENSP00000384603	NAGA
ENSP00000384660	ILF3
ENSP00000384682	ZC3H14
ENSP00000384700	PAPOLB
ENSP00000384703	DDX11
ENSP00000384753	ANKLE1
ENSP00000384774	HK1
ENSP00000384795	TNRC6B
ENSP00000384804	NEU4
ENSP00000384863	XPO1
ENSP00000384944	RBFOX2
ENSP00000384968	TRMT2A
ENSP00000385018	RPS7
ENSP00000385057	APOBEC3G
ENSP00000385077	SNRNP70
ENSP00000385149	NEU4
ENSP00000385217	IMP3
ENSP00000385228	CHTOP
ENSP00000385269	ELAVL1
ENSP00000385283	NAGA
ENSP00000385286	RPS7
ENSP00000385350	CHI3L1
ENSP00000385402	NEU4
ENSP00000385425	RPS14
ENSP00000385435	GALNT14
ENSP00000385536	DDX17
ENSP00000385555	NUP50
ENSP00000385559	XPO1
ENSP00000385610	MEX3C
ENSP00000385655	HENMT1
ENSP00000385726	EWSR1
ENSP00000385797	POMT1
ENSP00000385807	TRMT2A
ENSP00000385855	ZNF74
ENSP00000385942	XPO1
ENSP00000385958	RPS14
ENSP00000385992	PUM2
ENSP00000386028	SPAM1
ENSP00000386074	PUS10
ENSP00000386075	PNPT1
ENSP00000386107	UGT1A6
ENSP00000386156	WIBG
ENSP00000386194	RPE
ENSP00000386226	RBM34
ENSP00000386233	GALM
ENSP00000386234	LRPPRC
ENSP00000386297	ATHL1
ENSP00000386347	RBMS1
ENSP00000386354	GLB1L
ENSP00000386363	LSM5
ENSP00000386424	EIF4E2
ENSP00000386433	ZNF638
ENSP00000386466	UNC50
ENSP00000386468	C1D
ENSP00000386488	ZC3H8
ENSP00000386524	SSB
ENSP00000386561	RBM4
ENSP00000386571	RBMS1
ENSP00000386575	HNRPLL
ENSP00000386594	DIS3L2
ENSP00000386605	NABP1
ENSP00000386620	SLC3A1
ENSP00000386636	SSB
ENSP00000386677	SLC3A1
ENSP00000386681	RPL31
ENSP00000386695	HNRPLL
ENSP00000386707	LSM5
ENSP00000386709	SLC3A1
ENSP00000386711	JAKMIP1
ENSP00000386717	RPL31
ENSP00000386719	MDH1
ENSP00000386727	RBM44
ENSP00000386743	MDH1
ENSP00000386760	PIGQ
ENSP00000386779	C1D
ENSP00000386799	DIS3L2
ENSP00000386814	LSM5
ENSP00000386841	MGAT4A
ENSP00000386852	SLC3A1
ENSP00000386876	EIF4E2
ENSP00000386894	RBM4
ENSP00000386925	JAKMIP1
ENSP00000386942	ST6GAL2
ENSP00000386954	SLC3A1
ENSP00000386955	GALNT3
ENSP00000386983	EIF4E2
ENSP00000386996	EIF4E2
ENSP00000387006	CWC22
ENSP00000387042	JAKMIP1
ENSP00000387088	HNRPLL
ENSP00000387099	ATHL1
ENSP00000387109	LSM5
ENSP00000387126	LSM5
ENSP00000387140	HK2
ENSP00000387146	UNC50
ENSP00000387163	RPL31
ENSP00000387185	ATHL1
ENSP00000387218	AGFG1
ENSP00000387243	NABP1
ENSP00000387280	RBMS1
ENSP00000387308	SLC3A1
ENSP00000387317	ATP5G3
ENSP00000387328	EIF4E2
ENSP00000387332	ST6GAL2
ENSP00000387336	EIF4E2
ENSP00000387337	SLC3A1
ENSP00000387399	PUM2
ENSP00000387498	FUT2
ENSP00000387531	RBM26
ENSP00000387599	ATP6V1B1
ENSP00000387671	CHIA
ENSP00000387683	UGT2B11
ENSP00000387703	GLB1L
ENSP00000387718	GNPDA1
ENSP00000387729	PAIP1
ENSP00000387730	DDX31
ENSP00000387888	UGT2A1
ENSP00000387911	PARN
ENSP00000387968	CSTF1
ENSP00000387989	GLB1
ENSP00000387991	NUP62
ENSP00000388001	OAS1
ENSP00000388008	PCBP2
ENSP00000388156	CHID1
ENSP00000388221	MAN2A2
ENSP00000388353	ATP6V1B1
ENSP00000388475	U2AF2
ENSP00000388491	CNOT4
ENSP00000388529	RPL15
ENSP00000388530	CELF2
ENSP00000388571	PHKG2
ENSP00000388638	RBM17
ENSP00000388658	SLC25A12
ENSP00000388707	NEU4
ENSP00000388711	CSTF3
ENSP00000388828	FXR1
ENSP00000388876	HDLBP
ENSP00000388991	SRSF10
ENSP00000388999	DIS3L2
ENSP00000389135	IGF2BP1
ENSP00000389219	GRSF1
ENSP00000389246	ATP5S
ENSP00000389299	PPP1R10
ENSP00000389300	DAZ4
ENSP00000389304	DKC1
ENSP00000389380	SUGP2
ENSP00000389400	MRPL21
ENSP00000389402	BCS1L
ENSP00000389411	RPE
ENSP00000389497	TRDMT1
ENSP00000389536	FUBP1
ENSP00000389621	RBMY1J
ENSP00000389624	EIF4E
ENSP00000389649	ATP5J
ENSP00000389686	POC1B-GALNT4
ENSP00000389916	MDH1B
ENSP00000389951	CELF2
ENSP00000390034	ANKHD1
ENSP00000390121	DDX42
ENSP00000390148	ATP6V1G2
ENSP00000390149	HYAL1
ENSP00000390193	RPL15
ENSP00000390219	AMY1B
ENSP00000390222	RBM26
ENSP00000390279	RPL38
ENSP00000390304	PCBP2
ENSP00000390336	SF3A1
ENSP00000390476	CHIA
ENSP00000390556	LARP4B
ENSP00000390583	MAN2B1
ENSP00000390625	HNRPLL
ENSP00000390677	EIF5A
ENSP00000390832	AMY2A
ENSP00000390833	RNASET2
ENSP00000390878	ELAVL3
ENSP00000390901	NABP1
ENSP00000390904	EIF4E2
ENSP00000391132	CHIA
ENSP00000391175	DIS3L2
ENSP00000391225	ALKBH8
ENSP00000391231	LCT
ENSP00000391255	CHID1
ENSP00000391269	RBFOX1
ENSP00000391278	SRSF2
ENSP00000391290	RDM1
ENSP00000391336	ZCCHC17
ENSP00000391390	GUSB
ENSP00000391412	EIF4G1
ENSP00000391423	AMY2B
ENSP00000391432	RNPC3
ENSP00000391479	CAPRIN2
ENSP00000391491	SPAM1
ENSP00000391642	SLC3A1
ENSP00000391663	HYAL3
ENSP00000391666	HYAL1
ENSP00000391670	RBFOX2
ENSP00000391723	PUM1
ENSP00000391757	ELAVL2
ENSP00000391774	CPSF6
ENSP00000391823	RPS9
ENSP00000391922	HYAL3
ENSP00000391934	RBMS3
ENSP00000391935	EIF4G1
ENSP00000391986	HNRNPA1
ENSP00000392143	UCP3
ENSP00000392279	RPE
ENSP00000392349	RPS18
ENSP00000392451	PUS1
ENSP00000392464	MDH1B
ENSP00000392494	DDX3X
ENSP00000392582	GALNTL5
ENSP00000392601	DHX30
ENSP00000392747	NCL
ENSP00000392892	SARNP
ENSP00000392908	EIF4G1
ENSP00000393005	RDBP
ENSP00000393069	PSPC1
ENSP00000393151	HNRNPU
ENSP00000393204	ANKHD1
ENSP00000393241	RPS18
ENSP00000393248	PABPC1L2A
ENSP00000393257	RP4-697K14.7
ENSP00000393262	RBFOX3
ENSP00000393275	NANOS1
ENSP00000393324	EIF4E3
ENSP00000393358	HYAL1
ENSP00000393377	GLB1
ENSP00000393399	GALNT11
ENSP00000393584	AMY1B
ENSP00000393620	RDM1
ENSP00000393766	HDLBP
ENSP00000393828	CPSF7
ENSP00000393910	ATP6V0D1
ENSP00000393953	PNPT1
ENSP00000394085	JMJD6
ENSP00000394116	PCBP2
ENSP00000394151	FUCA2
ENSP00000394367	DDX59
ENSP00000394372	MAN2A2
ENSP00000394400	SKIV2L
ENSP00000394455	RPE
ENSP00000394460	ANKLE1
ENSP00000394526	HYAL1
ENSP00000394682	DHX30
ENSP00000394685	EIF2D
ENSP00000394769	NEU4
ENSP00000394824	RBM39
ENSP00000394864	PGM5
ENSP00000394879	RDBP
ENSP00000394902	TIAL1
ENSP00000395030	PCBP4
ENSP00000395098	PUM2
ENSP00000395196	EARS2
ENSP00000395244	TMEM229A
ENSP00000395311	CPSF4
ENSP00000395337	LDHA
ENSP00000395417	PUF60
ENSP00000395436	ATP6V1G2
ENSP00000395451	PYGB
ENSP00000395473	MAN2B1
ENSP00000395558	UBP1
ENSP00000395592	RBMS3
ENSP00000395616	PRKCSH
ENSP00000395640	SLC36A1
ENSP00000395693	DKC1
ENSP00000395704	CXCR6
ENSP00000395718	TDRKH
ENSP00000395758	SSB
ENSP00000395836	ITIH1
ENSP00000395893	THUMPD3
ENSP00000395915	NOL6
ENSP00000395923	FMR1
ENSP00000395974	EIF4G1
ENSP00000396073	EIF5A
ENSP00000396099	BOLL
ENSP00000396125	ERAL1
ENSP00000396127	RAN
ENSP00000396148	ATP6V0E2
ENSP00000396197	NEU4
ENSP00000396218	CXCR6
ENSP00000396403	NR0B1
ENSP00000396447	NXF2B
ENSP00000396458	IDUA
ENSP00000396506	ZMAT3
ENSP00000396521	LARP1B
ENSP00000396576	NUP214
ENSP00000396615	GLB1L3
ENSP00000396793	SF1
ENSP00000396886	CXCR6
ENSP00000396890	SSB
ENSP00000397029	SSB
ENSP00000397145	BRCA1
ENSP00000397203	CPSF7
ENSP00000397210	ADPGK
ENSP00000397219	WRAP53
ENSP00000397260	ATXN1
ENSP00000397267	SF3A1
ENSP00000397431	RDM1
ENSP00000397526	CPEB1
ENSP00000397582	AMY2A
ENSP00000397645	U2AF1L4
ENSP00000397673	ALKBH8
ENSP00000397674	RPE
ENSP00000397679	ENDOU
ENSP00000397694	ADPGK
ENSP00000397725	HNRNPK
ENSP00000397797	HNRNPH1
ENSP00000397860	NEU4
ENSP00000397926	RBMS3
ENSP00000397929	GLB1L3
ENSP00000397986	GBA
ENSP00000398026	HEXA
ENSP00000398119	FUCA2
ENSP00000398145	EIF4G1
ENSP00000398159	SRSF7
ENSP00000398202	ZNF239
ENSP00000398267	PABPC4
ENSP00000398310	CPEB3
ENSP00000398316	HK1
ENSP00000398497	PUS7L
ENSP00000398571	NEU4
ENSP00000398597	EXOSC6
ENSP00000398714	HYAL2
ENSP00000398722	CHID1
ENSP00000398845	XYLB
ENSP00000398921	RPUSD3
ENSP00000399108	CNOT4
ENSP00000399139	HDLBP
ENSP00000399309	NEU1
ENSP00000399440	PUM1
ENSP00000399463	GCKR
ENSP00000399473	GALM
ENSP00000399513	KL
ENSP00000399530	SKIV2L
ENSP00000399557	GANC
ENSP00000399677	HYAL2
ENSP00000399735	TSN
ENSP00000399783	SON
ENSP00000399797	MOV10
ENSP00000399831	NOL3
ENSP00000399836	AMY1A
ENSP00000399838	BPGM
ENSP00000399858	EIF4G1
ENSP00000399939	ELAVL4
ENSP00000400032	PUS1
ENSP00000400101	SLC25A13
ENSP00000400141	PUM1
ENSP00000400142	EWSR1
ENSP00000400397	RPUSD3
ENSP00000400433	HNRNPF
ENSP00000400439	CELF6
ENSP00000400449	RPE
ENSP00000400452	ALDOA
ENSP00000400467	RPL9
ENSP00000400519	RBMS3
ENSP00000400542	DKC1
ENSP00000400591	SNRPE
ENSP00000400626	SKIV2L
ENSP00000400646	PNPT1
ENSP00000400716	DAZ1
ENSP00000400738	GLB1L
ENSP00000401067	NEU1
ENSP00000401092	HYAL3
ENSP00000401177	NOL8
ENSP00000401198	PCBP3
ENSP00000401322	NCL
ENSP00000401343	EDC3
ENSP00000401363	DAZ4
ENSP00000401541	UGT1A6
ENSP00000401620	NCL
ENSP00000401627	AMY2B
ENSP00000401720	GK
ENSP00000401777	PUM1
ENSP00000401838	RPE
ENSP00000401853	HYAL2
ENSP00000401946	TNRC6B
ENSP00000402061	RPE
ENSP00000402103	HK1
ENSP00000402123	SPAM1
ENSP00000402430	ATP6V1G2
ENSP00000402481	YDJC
ENSP00000402544	SRSF7
ENSP00000402577	GBA
ENSP00000402630	FUBP1
ENSP00000402734	SRSF5
ENSP00000402745	RBFOX1
ENSP00000402838	MGAT1
ENSP00000402840	GCK
ENSP00000402953	PUF60
ENSP00000403158	ATP6V1G2
ENSP00000403172	RPL6
ENSP00000403175	RPS18
ENSP00000403264	GLB1
ENSP00000403269	EIF4G1
ENSP00000403290	IDNK
[truncated: 1,214 more rows]

## Sheet: HRV Target Human Protein list
HRV Target Human Protein list		Target Human proteins are human proteins interacted with HRV virus proteins based on the rule of shared GO terms (only GO terms at levels higher than 3 were considered)
Protein	Gene
ENSP00000003084	CFTR
ENSP00000004980	SENP1
ENSP00000005995	PRSS21
ENSP00000007264	RPUSD1
ENSP00000008527	CRY1
ENSP00000009589	RPS20
ENSP00000011292	CPA1
ENSP00000011653	CD4
ENSP00000012049	QPCTL
ENSP00000014112	PTBP1
ENSP00000015877	ADARB1
ENSP00000022615	VDAC3
ENSP00000028008	RNASET2
ENSP00000040877	TARBP1
ENSP00000044462	PSMA4
ENSP00000055077	RFC2
ENSP00000061240	TLL1
ENSP00000072644	YIPF1
ENSP00000075430	CTDP1
ENSP00000084795	RPL18
ENSP00000156084	OTUD5
ENSP00000156476	KLK13
ENSP00000156499	KLK14
ENSP00000157812	PSMC4
ENSP00000158149	C17orf85
ENSP00000161006	PRSS22
ENSP00000166345	TRIP13
ENSP00000169293	MASP1
ENSP00000171214	RDH8
ENSP00000175238	ADAM7
ENSP00000179765	BAZ2A
ENSP00000181383	CPB2
ENSP00000182377	FAR2
ENSP00000183936	CAPN3
ENSP00000188790	FAP
ENSP00000191018	CTSA
ENSP00000196169	TDRD3
ENSP00000196551	RPS5
ENSP00000198939	CHERP
ENSP00000199320	DIMT1
ENSP00000199814	RBM22
ENSP00000199936	HSD17B2
ENSP00000200557	ADAM11
ENSP00000200652	SLC22A4
ENSP00000202773	RPL6
ENSP00000202917	OAS1
ENSP00000203407	UQCRC1
ENSP00000203616	RBM41
ENSP00000203664	OTUB2
ENSP00000204801	CD209
ENSP00000205402	DLD
ENSP00000205557	ABCC6
ENSP00000206446	CMA1
ENSP00000206451	PSME1
ENSP00000206542	OSGEP
ENSP00000209665	ADH7
ENSP00000209668	ADH1A
ENSP00000209728	CDC6
ENSP00000209873	AAAS
ENSP00000210227	PTBP3
ENSP00000210313	PSMD5
ENSP00000211076	TPSD1
ENSP00000211372	RPS18
ENSP00000211402	VARS
ENSP00000215057	MZF1
ENSP00000215071	PSMD8
ENSP00000215587	POLR2E
ENSP00000215743	MMP11
ENSP00000215793	SF3A1
ENSP00000215956	NHP2L1
ENSP00000216024	DMC1
ENSP00000216039	JOSD1
ENSP00000216139	ACR
ENSP00000216181	MYH9
ENSP00000216225	RBX1
ENSP00000216277	PAPOLA
ENSP00000216281	HSP90AA1
ENSP00000216297	SUPT16H
ENSP00000216336	CTSG
ENSP00000216338	GZMH
ENSP00000216341	GZMB
ENSP00000216455	PSMA3
ENSP00000216500	DHRS7
ENSP00000216714	APEX1
ENSP00000216727	PABPN1
ENSP00000216774	SRP54
ENSP00000216802	PSME2
ENSP00000217073	PABPC1L
ENSP00000217074	PABPC1L
ENSP00000217075	PABPC1L
ENSP00000217109	CSTF1
ENSP00000217131	CTSZ
ENSP00000217425	WFDC2
ENSP00000217893	TAF9
ENSP00000217958	PSMD10
ENSP00000217964	TBL1X
ENSP00000218032	TLR8
ENSP00000218099	F9
ENSP00000218104	ABCD1
ENSP00000218200	FMR1
ENSP00000218348	USP11
ENSP00000218364	HTATSF1
ENSP00000218548	ATP12A
ENSP00000218981	DHRS12
ENSP00000219069	ZNF263
ENSP00000219070	MMP2
ENSP00000219252	POLR2C
ENSP00000219255	PARD6A
ENSP00000219271	MMP15
ENSP00000219301	PRSS54
ENSP00000219313	PSMD7
ENSP00000219439	HSDL1
ENSP00000219473	USP10
ENSP00000219478	ZNF500
ENSP00000219481	DECR2
ENSP00000219551	RHBDL1
ENSP00000219599	CRYM
ENSP00000219611	SOLH
ENSP00000219689	USP31
ENSP00000220166	CTSH
ENSP00000220496	DNAJC17
ENSP00000220592	EIF2C2
ENSP00000220763	CPQ
ENSP00000220764	DECR1
ENSP00000220772	SFRP1
ENSP00000220809	PLAT
ENSP00000220959	UBR5
ENSP00000220966	PYCRL
ENSP00000221233	EXOSC5
ENSP00000221403	DHDH
ENSP00000221413	RUVBL2
ENSP00000221419	HNRNPL
ENSP00000221431	FBXO17
ENSP00000221448	SNRNP70
ENSP00000221486	RNASEH2A
ENSP00000221504	TRMT1
ENSP00000221740	CASP14
ENSP00000221770	POP4
ENSP00000221801	FBL
ENSP00000221859	POLR2I
ENSP00000221975	RPS19
ENSP00000222247	RPL18A
ENSP00000222388	ABCF2
ENSP00000222390	HGF
ENSP00000222481	CPA2
ENSP00000222482	CPA4
ENSP00000222574	HBP1
ENSP00000223051	TFR2
ENSP00000223061	PCOLCE
ENSP00000223073	RBM28
ENSP00000223321	PSMA2
ENSP00000223357	AEBP1
ENSP00000223951	ELAVL2
ENSP00000224600	RBP3
ENSP00000224949	PITRM1
ENSP00000225282	NSF
ENSP00000225388	NUFIP2
ENSP00000225426	PSMB3
ENSP00000225430	RPL19
ENSP00000225504	SUPT4H1
ENSP00000225696	NUP88
ENSP00000225719	CPD
ENSP00000225792	DDX5
ENSP00000225831	CCL2
ENSP00000225842	CCL1
ENSP00000225929	HSD17B1
ENSP00000226207	MYH1
ENSP00000226279	CD38
ENSP00000226299	LAP3
ENSP00000227157	LDHA
ENSP00000227163	SPI1
ENSP00000227266	CTSC
ENSP00000227474	PUS3
ENSP00000227503	SF1
ENSP00000228140	RPS13
ENSP00000228226	HPR
ENSP00000228264	DDX11
ENSP00000228284	SART3
ENSP00000228327	NAV3
ENSP00000228476	DAO
ENSP00000228740	LTA4H
ENSP00000228827	GPN3
ENSP00000228843	RAD51AP1
ENSP00000228928	OAS3
ENSP00000228955	GTF2H3
ENSP00000229003	ENDOU
ENSP00000229179	NUP107
ENSP00000229214	KRR1
ENSP00000229268	USP5
ENSP00000229304	APOBEC1
ENSP00000229330	HCFC2
ENSP00000229390	SRSF9
ENSP00000229395	FGFR1OP2
ENSP00000229471	FYN
ENSP00000229854	MCM3
ENSP00000230050	RPS12
ENSP00000230236	HSD17B8
ENSP00000230301	C6orf118
ENSP00000230354	TBP
ENSP00000230582	PRSS16
ENSP00000230588	MEP1A
ENSP00000230771	HARS2
ENSP00000230859	PAPD7
ENSP00000231009	GZMK
ENSP00000231368	LNPEP
ENSP00000231487	SKP1
ENSP00000231498	NUP155
ENSP00000231572	RARS
ENSP00000231751	LTF
ENSP00000231887	EHHADH
ENSP00000231948	CRBN
ENSP00000232165	UBE3A
ENSP00000232888	RRP9
ENSP00000233025	SPCS1
ENSP00000233078	DAZAP1
ENSP00000233084	DDX1
ENSP00000233114	MDH1
ENSP00000233468	AC008073.5
ENSP00000233609	RPS15
ENSP00000233997	AZU1
ENSP00000234071	PROC
ENSP00000234347	PRTN3
ENSP00000234677	SARS
ENSP00000234798	TPSG1
ENSP00000235521	WARS2
ENSP00000235547	HSD3B1
ENSP00000235628	NT5C1A
ENSP00000236228	PTBP2
ENSP00000236412	PPP1R8
ENSP00000236671	CTSD
ENSP00000236826	MMP8
ENSP00000237289	TNFAIP3
ENSP00000237449	DNAH6
ENSP00000237612	ABCG2
ENSP00000237653	ADH6
ENSP00000237865	CASP10
ENSP00000238112	CPSF3
ENSP00000238146	DDX55
ENSP00000238248	PTGR1
ENSP00000238341	CNTRL
ENSP00000238497	VPS4B
ENSP00000238688	SLIRP
ENSP00000238714	PAPOLG
ENSP00000238789	ATAD2B
ENSP00000239457	DARS2
ENSP00000239852	MTRF1
ENSP00000240185	TARDBP
ENSP00000240285	RDH10
ENSP00000240727	ZSCAN18
ENSP00000241305	CPXM2
ENSP00000241393	CXCR4
ENSP00000242059	SCRN1
ENSP00000242210	NT5C3
ENSP00000242248	POLM
ENSP00000242351	ZC3HAV1
ENSP00000242839	ATP7B
ENSP00000243346	NMI
ENSP00000243498	EXOSC9
ENSP00000243563	SNRPA
ENSP00000244020	SRSF6
ENSP00000244051	MOCS3
ENSP00000244137	PEPD
ENSP00000244533	ABCC10
ENSP00000244546	PEX6
ENSP00000244571	AARS2
ENSP00000244669	APOBEC2
ENSP00000244769	ATXN1
ENSP00000244776	DEK
ENSP00000245121	KATNAL2
ENSP00000245418	UPF3B
ENSP00000245441	NIN
ENSP00000245458	RPS29
ENSP00000245539	MRPS7
ENSP00000245544	NUP85
ENSP00000245551	MIF4GD
ENSP00000245816	CLPP
ENSP00000245838	THOC2
ENSP00000246071	SNRPB2
ENSP00000246117	NCLN
ENSP00000246186	MMP24
ENSP00000246194	RALY
ENSP00000246314	EIF2C3
ENSP00000246533	CAPNS1
ENSP00000247001	SUGP1
ENSP00000247003	DDX49
ENSP00000247170	DAAM1
ENSP00000247470	PYCARD
ENSP00000248566	SHFM1
ENSP00000248633	PEX1
ENSP00000249269	PMPCB
ENSP00000249736	SLTM
ENSP00000250066	USP6
ENSP00000250076	ZNF232
ENSP00000250113	FXR2
ENSP00000250144	MMP28
ENSP00000250156	MRM1
ENSP00000250241	ILF3
ENSP00000250244	AP1M2
ENSP00000250351	KLK12
ENSP00000250352	KLK12
ENSP00000250366	KLK9
ENSP00000250378	CMA1
ENSP00000250383	DHRS2
ENSP00000250495	NEDD8
ENSP00000250784	RPS4Y1
ENSP00000250831	RBMY1J
ENSP00000250863	DAZL
ENSP00000251030	KIAA0564
ENSP00000251038	ZC3H14
ENSP00000251071	CAPRIN2
ENSP00000251074	NUP37
ENSP00000251312	DHRS11
ENSP00000251453	RPS16
ENSP00000251582	ADAMTS2
ENSP00000251607	TRNT1
ENSP00000251722	USP40
ENSP00000251758	DDX11
ENSP00000251968	TSG101
ENSP00000252115	POLDIP3
ENSP00000252116	POLDIP3
ENSP00000252136	TRMT2A
ENSP00000252207	ZNF193
ENSP00000252211	ZKSCAN3
ENSP00000252455	PRKCSH
ENSP00000252463	ZSCAN10
ENSP00000252519	ACE2
ENSP00000252542	SAFB2
ENSP00000252543	RPL36
ENSP00000252595	SLC27A1
ENSP00000252813	PGPEP1
ENSP00000252816	LSM4
ENSP00000252996	TAF4
ENSP00000253108	EIF3G
ENSP00000253329	PPIL4
ENSP00000253363	RBM39
ENSP00000253496	F12
ENSP00000253577	ABCB7
ENSP00000253693	CAPN7
ENSP00000253719	NAPSA
ENSP00000253788	RPL27
ENSP00000253811	DIAPH1
ENSP00000253952	THOC6
ENSP00000254108	FUS
ENSP00000254165	ZSCAN5A
ENSP00000254181	USP29
ENSP00000254193	SNRPA1
ENSP00000254231	LIN28A
ENSP00000254235	ADCY7
ENSP00000254436	TRIM21
ENSP00000254508	NUP210
ENSP00000254521	HSD17B7
ENSP00000254799	GRSF1
ENSP00000254821	ZRANB2
ENSP00000254928	ERAL1
ENSP00000254940	NIP7
ENSP00000254941	NIP7
ENSP00000254950	VPS4A
ENSP00000255078	IGHMBP2
ENSP00000255136	PABPC1L
ENSP00000255256	CASP9
ENSP00000255283	ATP8A2
ENSP00000255381	MYH4
ENSP00000256031	ATP13A3
ENSP00000256216	HSD17B4
ENSP00000256383	EIF2S1
ENSP00000256389	ADAM20
ENSP00000256412	ADAMDEC1
ENSP00000256413	CTIF
ENSP00000256443	CDK7
ENSP00000256474	VHL
ENSP00000256644	HBXIP
ENSP00000256854	NARS
ENSP00000256897	CCNH
ENSP00000256935	DOCK2
ENSP00000256999	FOLH1
ENSP00000257075	PUM1
ENSP00000257177	ZCCHC11
ENSP00000257347	CARS2
ENSP00000257359	ADAMTS8
ENSP00000257527	ADAM19
ENSP00000257548	USP30
ENSP00000257552	MSI1
ENSP00000257570	OASL
ENSP00000257622	POM121
ENSP00000257765	KHDC1
ENSP00000257770	NT5E
ENSP00000257895	RDH5
ENSP00000257934	ESPL1
ENSP00000258080	HTRA2
ENSP00000258123	USP15
ENSP00000258169	MPHOSPH6
ENSP00000258383	MRPL44
ENSP00000258399	USP37
ENSP00000258416	EIF4E2
ENSP00000258428	REV1
ENSP00000258729	IGF2BP3
ENSP00000258737	RAC1
ENSP00000258738	ABCB5
ENSP00000258742	NUPL2
ENSP00000258772	DDX56
ENSP00000258884	FAM108C1
ENSP00000258886	IREB2
ENSP00000258947	CALCOCO2
ENSP00000258960	NMT1
ENSP00000258962	SRSF1
ENSP00000259119	SKIL
ENSP00000259339	TOR1B
ENSP00000259457	PSMB7
ENSP00000259469	RPL35
ENSP00000259470	CTSL2
ENSP00000259746	TMEM63B
ENSP00000259782	TINAG
ENSP00000259883	PGBD1
ENSP00000259895	GTF2H4
ENSP00000259997	CPEB2
ENSP00000260184	DDX60L
ENSP00000260187	USP2
ENSP00000260188	USP28
ENSP00000260227	MMP7
ENSP00000260228	MMP20
ENSP00000260229	MMP27
ENSP00000260302	MMP13
ENSP00000260315	CASP5
ENSP00000260318	ALKBH8
ENSP00000260408	ADAM10
ENSP00000260604	PNPT1
ENSP00000260619	THUMPD2
ENSP00000260645	ABCG5
ENSP00000260648	PREPL
ENSP00000260665	LRPPRC
ENSP00000260947	BARD1
ENSP00000260956	SSB
ENSP00000261173	ATP2B1
ENSP00000261180	TRHDE
ENSP00000261200	ABCC9
ENSP00000261201	ABCC9
ENSP00000261202	ABCC9
ENSP00000261220	METAP2
ENSP00000261245	MNAT1
ENSP00000261296	TGDS
ENSP00000261303	PSMC1
ENSP00000261332	ZNF24
ENSP00000261333	ZNF397
ENSP00000261377	AC004381.6
ENSP00000261383	DNAH3
ENSP00000261396	NUP133
ENSP00000261424	RFC1
ENSP00000261443	CSDE1
ENSP00000261465	HSD11B1
ENSP00000261479	PSMA6
ENSP00000261488	ENOX1
ENSP00000261592	NOL4
ENSP00000261600	THOC1
ENSP00000261601	USP14
ENSP00000261615	DPEP1
ENSP00000261674	SFSWAP
ENSP00000261712	PSMD11
ENSP00000261714	BLMH
ENSP00000261723	CPEB1
ENSP00000261741	RBM19
ENSP00000261772	AARS
ENSP00000261817	PSMD9
ENSP00000261862	THSD4
ENSP00000261879	APH1B
ENSP00000261900	CCNT1
ENSP00000261951	CNOT6
ENSP00000261970	PSEN1
ENSP00000261973	RBM25
ENSP00000262027	MARS
ENSP00000262030	ATP5B
ENSP00000262031	RBMS2
ENSP00000262056	EIF4B
ENSP00000262077	NUP153
ENSP00000262124	SEH1L
ENSP00000262173	RNMT
ENSP00000262193	PSMB1
ENSP00000262238	YY1
ENSP00000262239	PPP2R5C
ENSP00000262288	SCPEP1
ENSP00000262302	NUBP2
ENSP00000262315	CHTF18
ENSP00000262316	RHBDF1
ENSP00000262325	AP2B1
ENSP00000262415	DHX8
ENSP00000262429	ATP2C2
ENSP00000262442	DNAH9
ENSP00000262462	SLC27A6
ENSP00000262519	SETD1A
ENSP00000262520	HSD3B7
ENSP00000262542	HSDL2
ENSP00000262545	PCSK2
ENSP00000262584	RPL8
ENSP00000262623	ATP4A
ENSP00000262626	HPN
ENSP00000262633	RBM42
ENSP00000262679	NRD1
ENSP00000262710	ACIN1
ENSP00000262715	TEP1
ENSP00000262794	MOV10L1
ENSP00000262803	UPF1
ENSP00000262809	ELL
ENSP00000262829	RBFOX2
ENSP00000262873	MYH7B
ENSP00000262941	ZNF498
ENSP00000262960	DPP9
ENSP00000262966	MPND
ENSP00000263014	ABCC1
ENSP00000263016	ABCC1
ENSP00000263017	ABCC1
ENSP00000263019	ABCC1
ENSP00000263032	NXF5
ENSP00000263063	MTPAP
ENSP00000263094	ABCA7
ENSP00000263239	DDX18
ENSP00000263256	DESI1
ENSP00000263257	NOVA2
ENSP00000263270	AP2S1
ENSP00000263271	AP2S1
ENSP00000263278	HSD17B14
ENSP00000263317	NOX4
ENSP00000263368	BLVRB
ENSP00000263519	ATP2B3
ENSP00000263576	DDX25
ENSP00000263598	LCN1
ENSP00000263604	KCNT1
ENSP00000263621	ELANE
ENSP00000263657	PNO1
ENSP00000263672	SPCS2
ENSP00000263702	MECR
ENSP00000263736	SRBD1
ENSP00000263817	ABCB11
ENSP00000263831	DESI2
ENSP00000263966	USP13
ENSP00000263974	TAF12
ENSP00000264018	DDX6
ENSP00000264073	ELAVL1
ENSP00000264090	MTHFD2
ENSP00000264151	OSGEPL1
ENSP00000264157	CCNT2
ENSP00000264161	DARS
ENSP00000264169	ORC4
ENSP00000264205	ECE1
ENSP00000264211	EIF4G3
ENSP00000264258	RPL31
ENSP00000264274	CASP8
ENSP00000264275	CASP8
ENSP00000264377	ADAM23
ENSP00000264424	GUCY1B3
ENSP00000264447	ZNF638
ENSP00000264449	ATP8A1
ENSP00000264451	SLC30A9
ENSP00000264553	GZMM
ENSP00000264584	LARP1B
ENSP00000264639	PSMD3
ENSP00000264645	CASC3
ENSP00000264689	UFSP2
ENSP00000264690	KLKB1
ENSP00000264691	F11
ENSP00000264692	F11
ENSP00000264718	GPN1
ENSP00000264867	PPARGC1A
ENSP00000264883	NUP54
ENSP00000264951	XRN1
ENSP00000264991	UBA5
ENSP00000264995	MRPL3
ENSP00000265016	BST1
ENSP00000265069	ZFR
ENSP00000265085	CPEB4
ENSP00000265097	THOC3
ENSP00000265100	RPL26L1
ENSP00000265104	DNAH5
ENSP00000265112	TARS
ENSP00000265162	ENPEP
ENSP00000265164	CASP6
ENSP00000265174	PAPSS1
ENSP00000265187	MCM8
ENSP00000265271	RBM27
ENSP00000265316	ABCB6
ENSP00000265322	PECR
ENSP00000265348	CUL7
ENSP00000265351	XPO5
ENSP00000265385	IMPDH1
ENSP00000265394	CPVL
ENSP00000265421	POLB
ENSP00000265523	BLVRA
ENSP00000265537	LARS2
ENSP00000265564	EXOSC7
ENSP00000265586	ABCC5
ENSP00000265607	RNGTT
ENSP00000265651	FBXO3
ENSP00000265662	ABCA2
ENSP00000265707	ADAM18
ENSP00000265708	ADAM2
ENSP00000265723	ABCB4
ENSP00000265724	ABCB1
ENSP00000265727	ADAM22
ENSP00000265732	RBM48
ENSP00000265753	EIF4H
ENSP00000265754	EIF4H
ENSP00000265769	ADAM28
ENSP00000265806	R3HCC1
ENSP00000265866	HNRNPH3
ENSP00000265963	GTF2H1
ENSP00000265986	IDE
ENSP00000265997	CPEB3
ENSP00000266022	RBM6
ENSP00000266079	PRPF6
ENSP00000266529	ZCRB1
ENSP00000266542	C1RL
ENSP00000266544	NDUFA9
ENSP00000266679	CPSF6
ENSP00000266692	NAV3
ENSP00000266735	SNRPF
ENSP00000266880	CHFR
ENSP00000266991	DHH
ENSP00000267197	SETD1B
ENSP00000267202	VPS37B
ENSP00000267229	RBM26
ENSP00000267287	MBNL2
ENSP00000267422	NOVA1
ENSP00000267425	NOP9
ENSP00000267499	ADAM21
ENSP00000267502	RDH12
ENSP00000267568	PTGR2
ENSP00000267836	MYEF2
ENSP00000267868	RAD51
ENSP00000267884	SRP14
ENSP00000268049	USP3
ENSP00000268070	ADAMTS17
ENSP00000268171	FURIN
ENSP00000268220	SEC11A
ENSP00000268281	PRSS36
ENSP00000268379	UQCRC2
ENSP00000268605	NOL3
ENSP00000268624	ADAD2
ENSP00000268655	ZNF174
ENSP00000268661	RPL3L
ENSP00000268704	SPG7
ENSP00000268793	DPEP3
ENSP00000268797	GFOD2
ENSP00000268854	DDX52
ENSP00000269051	RHBDL3
ENSP00000269080	ABCA8
ENSP00000269081	ABCA10
ENSP00000269142	TAF4B
ENSP00000269143	AFG3L2
ENSP00000269185	NOL4
ENSP00000269202	MEP1B
ENSP00000269534	NT5C3L
ENSP00000269919	PGPEP1
ENSP00000270188	PLAT
ENSP00000270189	PLAT
ENSP00000270225	SAE1
ENSP00000270328	ADAMTS10
ENSP00000270357	RNPEPL1
ENSP00000270361	CAPN10
ENSP00000270362	CAPN10
ENSP00000270364	CAPN10
ENSP00000270586	PSMB6
ENSP00000270625	RPS11
ENSP00000271064	TINAGL1
ENSP00000271308	PSMA5
ENSP00000271469	UAP1
ENSP00000271628	SF3B4
ENSP00000271643	ADAMTSL4
ENSP00000271651	CTSK
ENSP00000271764	EIF2D
ENSP00000271836	ADAM15
ENSP00000271857	SLC27A3
ENSP00000271971	CAPN9
ENSP00000272102	ARF1
ENSP00000272190	REN
ENSP00000272249	HNRPLL
ENSP00000272317	RPS27A
ENSP00000272348	SNRPG
ENSP00000272418	MRPS5
ENSP00000272444	DUSP11
ENSP00000272570	ZC3H8
ENSP00000272645	POLR2D
ENSP00000272732	SCRN3
ENSP00000272852	CPO
ENSP00000272879	CASP10
ENSP00000272895	ABCA12
ENSP00000273009	DIS3L2
ENSP00000273075	DNPEP
ENSP00000273139	RBMS3
ENSP00000273283	ITIH1
ENSP00000273320	ZNF167
ENSP00000273359	ABHD10
ENSP00000273654	CCDC39
ENSP00000273857	CORIN
ENSP00000273859	ATP10D
ENSP00000274008	SPATA5
ENSP00000274054	NAF1
ENSP00000274181	ADAMTS16
ENSP00000274242	RPL37
ENSP00000274306	GZMA
ENSP00000274400	GTF2H2
ENSP00000274487	ADAMTS19
ENSP00000274562	LARS
ENSP00000274609	ADAMTS2
ENSP00000274680	FARS2
ENSP00000274849	ABT1
ENSP00000275262	QKI
ENSP00000275627	RFC2
ENSP00000275763	AGBL3
ENSP00000275820	NOM1
ENSP00000276072	TAF1
ENSP00000276079	NONO
ENSP00000276201	UPF3B
ENSP00000277165	FAM120A
ENSP00000277198	C9orf3
ENSP00000277865	GLUD1
ENSP00000277903	HABP2
ENSP00000278070	PPRC1
ENSP00000278200	IMMP1L
ENSP00000278224	CARS
ENSP00000278279	TUT1
ENSP00000278319	ZNF215
ENSP00000278353	HSD17B12
ENSP00000278360	PAMR1
ENSP00000278407	SERPING1
ENSP00000278412	SSRP1
ENSP00000278559	CAPN5
ENSP00000278572	RPS3
ENSP00000278742	ST14
ENSP00000279247	CAPN1
ENSP00000279259	FAU
ENSP00000279441	MMP10
ENSP00000280056	DHRS12
ENSP00000280154	PDCD4
ENSP00000280258	PRSS23
ENSP00000280377	USP15
ENSP00000280559	ABCB9
ENSP00000280560	ABCB9
ENSP00000280591	TRNT1
ENSP00000280606	PRSS53
ENSP00000280704	LDHC
ENSP00000280706	LDHAL6A
ENSP00000280892	EIF4E
ENSP00000280969	MAT2B
ENSP00000281038	NARS2
ENSP00000281156	KHDRBS2
ENSP00000281317	MMAA
ENSP00000281456	SLC25A4
ENSP00000281474	BICD1
ENSP00000281496	KIAA0564
ENSP00000281589	PABPC3
ENSP00000281620	ATP8A2
ENSP00000281701	NVL
ENSP00000281722	RBM46
ENSP00000281828	FARSB
ENSP00000282268	XRCC4
ENSP00000282276	MARS2
ENSP00000282278	BOLL
ENSP00000282326	ZSCAN1
ENSP00000282344	USP12
ENSP00000282388	ZFP36L2
ENSP00000282486	MBNL1
ENSP00000282488	MBNL1
ENSP00000282574	TIA1
ENSP00000282641	A1CF
ENSP00000282849	ADAMTS18
ENSP00000282891	RAD17
ENSP00000282924	JAKMIP1
ENSP00000282957	CPB1
ENSP00000283027	NUBP1
ENSP00000283148	UXS1
ENSP00000283179	HNRNPU
ENSP00000283195	RANBP2
ENSP00000283429	NMRAL1
ENSP00000283558	ATP11A
ENSP00000283628	UBP1
ENSP00000283629	UBP1
ENSP00000283684	ATP8B1
ENSP00000283875	GTF2E1
ENSP00000283916	TMPRSS11D
ENSP00000284073	MSI2
ENSP00000284425	ABCA6
ENSP00000284440	UCHL1
ENSP00000284509	ATP8B4
ENSP00000284811	TCEB1
ENSP00000284885	TMPRSS15
ENSP00000284967	MRPL39
ENSP00000284984	ADAMTS1
ENSP00000284987	ADAMTS5
ENSP00000285199	USP43
ENSP00000285238	ABCC3
ENSP00000285333	CASP6
ENSP00000285397	AKD1
ENSP00000285398	ERCC3
ENSP00000285679	USP25
ENSP00000285681	USP25
ENSP00000285737	LONP2
ENSP00000285814	MKI67IP
ENSP00000285968	NUP205
ENSP00000286070	RBM45
ENSP00000286186	CASP10
ENSP00000286355	ADCY8
ENSP00000286614	MMP16
ENSP00000286627	KCNMA1
ENSP00000286628	KCNMA1
ENSP00000286657	ADAMTS3
ENSP00000286744	ADAMTSL3
ENSP00000286760	WHAMM
ENSP00000286835	SCAF4
ENSP00000287038	RPL30
ENSP00000287078	TYSND1
ENSP00000287202	CELF6
ENSP00000287394	ATAD2
ENSP00000287713	NMNAT2
ENSP00000287771	RBPMS
ENSP00000287844	ABCF2
ENSP00000287908	STEAP2
ENSP00000287912	RBM33
ENSP00000288071	DDX19B
ENSP00000288111	DHRS1
ENSP00000288245	HMGA1
ENSP00000288666	RPS4Y2
ENSP00000288709	MMEL1
ENSP00000289248	RHBDL2
ENSP00000289381	CAPN10
ENSP00000289788	ZSCAN23
ENSP00000289865	USP21
ENSP00000290122	CELA3A
ENSP00000290158	KPNB1
ENSP00000290216	SCRN2
ENSP00000290239	SON
ENSP00000290244	CRYZL1
ENSP00000290341	IGF2BP1
ENSP00000290349	CBR1
ENSP00000290541	PSMB4
ENSP00000290575	C1R
ENSP00000290583	CELF3
ENSP00000290585	CELF3
ENSP00000290810	NAE1
ENSP00000290863	ACE
ENSP00000290866	ACE
ENSP00000290921	CTBP1
ENSP00000291439	AP1M1
ENSP00000291503	ATP13A1
ENSP00000291524	ABCG1
ENSP00000291532	TMPRSS3
ENSP00000291552	U2AF1
ENSP00000291688	MCM3AP
ENSP00000291726	KLK8
ENSP00000291892	RDH13
ENSP00000292095	AP000892.1
ENSP00000292123	SAFB
ENSP00000292205	ADAR
ENSP00000292303	CCR5
ENSP00000292450	ZSCAN21
ENSP00000292476	CPSF4
ENSP00000292510	VPS28
ENSP00000292614	POLR2J
ENSP00000292644	PSMC2
ENSP00000292672	CELF5
ENSP00000292807	AP2M1
ENSP00000292808	ABCF3
ENSP00000292823	PCYT1A
ENSP00000292879	U2AF1L4
ENSP00000293273	RDM1
ENSP00000293362	PSME3
ENSP00000293371	DCD
ENSP00000293502	SDR9C7
ENSP00000293618	LARP4
ENSP00000293636	CELA1
ENSP00000293677	RAVER1
ENSP00000293842	RPL26
ENSP00000293851	PRSS33
ENSP00000294053	CLPB
ENSP00000294172	NXF1
ENSP00000294189	RPL29
ENSP00000294383	USP24
ENSP00000294428	RAVER2
ENSP00000294623	FUBP1
ENSP00000294678	ODF2L
ENSP00000294702	GFI1
ENSP00000294753	ZNF496
ENSP00000294785	NCSTN
ENSP00000294868	NMNAT2
ENSP00000294904	RBMS1
ENSP00000295006	CAPN2
ENSP00000295055	CAPN13
ENSP00000295119	NUP35
ENSP00000295238	CCNT2
ENSP00000295470	HNRPDL
ENSP00000295488	HELQ
ENSP00000295548	ATP13A4
ENSP00000295598	ATP1A1
ENSP00000295612	EIF4E3
ENSP00000295624	NAV1
ENSP00000295640	RNPEP
ENSP00000295731	IHH
ENSP00000295749	CWC22
ENSP00000295750	ABCB6
ENSP00000295822	EIF5A2
ENSP00000295899	THOC7
ENSP00000295901	PSMD6
ENSP00000295903	ADAMTS9
ENSP00000295937	DNAH12
ENSP00000295959	RPP14
ENSP00000295971	RBM47
ENSP00000296015	TTC14
ENSP00000296046	CPA3
ENSP00000296137	FYCO1
ENSP00000296202	NMNAT3
ENSP00000296223	POLR2H
ENSP00000296257	SENP2
ENSP00000296273	RFC4
ENSP00000296280	MASP1
ENSP00000296411	METAP1
ENSP00000296412	ADH5
ENSP00000296424	BDH2
ENSP00000296456	APEH
ENSP00000296498	PRSS12
ENSP00000296513	ADAD1
ENSP00000296522	HPGD
ENSP00000296577	ABCE1
ENSP00000296581	LSM6
ENSP00000296674	RPS23
ENSP00000296754	ERAP1
ENSP00000296820	TERT
ENSP00000296930	NPM1
ENSP00000297071	TRA2A
ENSP00000297183	ANKHD1
ENSP00000297229	USP49
ENSP00000297261	SHH
ENSP00000297431	ORC5
ENSP00000297504	ABCB8
ENSP00000297540	PHAX
ENSP00000297679	HSD3B7
ENSP00000297767	PRSS37
ENSP00000297769	CPA6
ENSP00000297770	CPA6
ENSP00000297979	C9orf3
ENSP00000297990	NOL6
ENSP00000298131	ATG4A
ENSP00000298139	WRN
ENSP00000298173	GTF2A1
ENSP00000298317	RPUSD4
ENSP00000298358	NOXRED1
ENSP00000298468	VDAC2
ENSP00000298480	KCNT1
ENSP00000298556	HPRT1
ENSP00000298701	CASP7
ENSP00000298717	METTL3
ENSP00000298746	TRUB1
ENSP00000298852	PSMC3
ENSP00000298861	AGBL2
ENSP00000298875	CPSF2
ENSP00000298892	CAPRIN2
ENSP00000298999	R3HCC1L
ENSP00000299164	ADAMTS15
ENSP00000299206	POLL
ENSP00000299213	LARP6
ENSP00000299367	C2
ENSP00000299424	TAF10
ENSP00000299427	TPP1
ENSP00000299472	NOVA1
ENSP00000299543	CTDP1
ENSP00000299714	SEC11C
ENSP00000299767	HSP90B1
ENSP00000299855	MMP3
ENSP00000299882	TMPRSS5
ENSP00000299980	AP1G1
ENSP00000300038	UEVLD
ENSP00000300060	ANPEP
ENSP00000300069	RBPMS2
ENSP00000300107	CLPX
ENSP00000300141	DPP8
ENSP00000300145	XRCC6BP1
ENSP00000300146	PATL1
ENSP00000300278	SON
ENSP00000300289	PDIA3
ENSP00000300291	NUDT21
ENSP00000300413	SNRPD1
ENSP00000300456	SLC27A4
ENSP00000300762	MMP26
ENSP00000300896	USP32
ENSP00000300954	PCSK4
ENSP00000301357	CD209
ENSP00000301382	HSD11B1L
ENSP00000301387	ATP2A3
ENSP00000301420	KLK1
ENSP00000301421	KLK15
ENSP00000301624	TNRC6C
ENSP00000301730	RNPS1
ENSP00000301732	ABCA3
ENSP00000301740	SRRM2
ENSP00000301765	VPS37C
ENSP00000301788	POLR2G
ENSP00000301825	ENTPD3
ENSP00000301962	USP42
ENSP00000301995	SCAND1
ENSP00000302051	ECEL1
ENSP00000302160	LSM3
ENSP00000302239	USP8
ENSP00000302310	ZNF396
ENSP00000302393	LDHAL6B
ENSP00000302397	ATP1A3
ENSP00000302485	CSDC2
ENSP00000302768	PAIP1
ENSP00000302805	DDI1
ENSP00000302886	PA2G4
ENSP00000302896	RPS9
ENSP00000302916	JMJD6
ENSP00000302993	FIP1L1
ENSP00000303015	ZRSR2
ENSP00000303043	KARS
ENSP00000303129	VAT1L
ENSP00000303134	RAD17
ENSP00000303208	PCSK9
ENSP00000303279	IARS2
ENSP00000303356	DCXR
ENSP00000303434	USP38
ENSP00000303511	PEX6
ENSP00000303634	LRP8
ENSP00000303712	RBMY1A1
ENSP00000303766	HTRA3
ENSP00000303960	ABCC8
ENSP00000303963	CTRB2
ENSP00000304072	DDX54
ENSP00000304111	ABCG4
ENSP00000304139	RBMXL2
ENSP00000304161	MALT1
ENSP00000304336	PYDC1
ENSP00000304350	PRPF8
ENSP00000304405	HNRNPR
ENSP00000304414	CXCR6
ENSP00000304467	THOP1
ENSP00000304500	ATP9B
ENSP00000304592	FASN
ENSP00000304668	HARS
ENSP00000304697	UBB
ENSP00000304791	KLK7
ENSP00000304994	DACH1
ENSP00000305056	PCSK6
ENSP00000305223	RCAN2
ENSP00000305230	SRP9
ENSP00000305438	HSD17B13
ENSP00000305473	USP6
ENSP00000305494	SPATA5L1
ENSP00000305503	NUP62
ENSP00000305545	STEAP4
ENSP00000305556	PCBP1
ENSP00000305617	MCC
ENSP00000305682	MRPL39
ENSP00000305714	BMP1
ENSP00000305857	SMN1
ENSP00000305860	HNRNPD
ENSP00000305919	HTRA4
ENSP00000305926	OTUD7A
ENSP00000305979	NT5C1B
ENSP00000306080	RNMTL1
ENSP00000306117	DDX19A
ENSP00000306121	BMP1
ENSP00000306223	SNRPN
ENSP00000306390	PRSS27
ENSP00000306528	DESI2
ENSP00000306565	ISG20
ENSP00000306606	ADH1B
ENSP00000306759	TNRC6B
ENSP00000307004	APLF
ENSP00000307025	ZC3H14
ENSP00000307155	RBMY1F
ENSP00000307181	FAM103A1
ENSP00000307288	MCM7
ENSP00000307307	EXOSC10
ENSP00000307445	LTB4R
ENSP00000307519	TMPRSS11E
ENSP00000307537	DAZ3
ENSP00000307567	QARS
ENSP00000307607	SDR16C5
ENSP00000307633	FXR1
ENSP00000307732	LONRF3
ENSP00000307774	ZNF239
ENSP00000307863	U2AF2
ENSP00000307889	RPL13
ENSP00000307939	GCC2
ENSP00000307968	NABP1
ENSP00000308000	TUT1
ENSP00000308012	PABPC5
ENSP00000308024	PCSK1
ENSP00000308149	AMZ1
ENSP00000308208	MMP14
ENSP00000308227	HMGA1
ENSP00000308369	LEMD3
ENSP00000308386	CELF1
ENSP00000308540	RP11-1407O15.2
ENSP00000308541	F2
ENSP00000308685	ADCY5
ENSP00000308720	PRSS1
ENSP00000308938	PLG
ENSP00000309031	VCPIP1
ENSP00000309066	DPP10
ENSP00000309092	GMPPB
ENSP00000309117	RBFOX1
ENSP00000309124	OLR1
ENSP00000309148	KLK6
ENSP00000309163	RCE1
ENSP00000309166	RBM4
ENSP00000309175	EIF1AD
ENSP00000309240	USP15
ENSP00000309262	USP48
ENSP00000309334	RPL15
ENSP00000309474	PSMD1
ENSP00000309477	ACO1
ENSP00000309479	RAD51AP1
ENSP00000309542	PGA5
ENSP00000309558	TAF15
ENSP00000309572	TERT
ENSP00000309577	NAV2
ENSP00000309749	APOBEC3F
ENSP00000309830	RPL38
ENSP00000309965	DDX11
ENSP00000309968	ADAM17
ENSP00000310015	ADAT1
ENSP00000310040	EIF3F
ENSP00000310129	PSMD2
ENSP00000310205	NRIP3
ENSP00000310275	BANF1
ENSP00000310471	RBM4B
ENSP00000310539	DDX31
ENSP00000310572	PSMC5
ENSP00000310590	USP36
ENSP00000310596	LSM1
ENSP00000310668	NUP93
ENSP00000310676	PARL
ENSP00000310688	ABCD2
ENSP00000310771	GRB7
ENSP00000310832	CTSF
ENSP00000311024	TAF5
ENSP00000311028	RPS14
ENSP00000311030	ABCC12
ENSP00000311032	CASP3
ENSP00000311121	PSMA8
ENSP00000311130	GMPPB
ENSP00000311186	ATP2A2
ENSP00000311221	ZMAT3
ENSP00000311227	RAD17
ENSP00000311273	DNAH7
ENSP00000311300	CTSW
ENSP00000311318	ATG4D
ENSP00000311326	ABCC11
ENSP00000311336	ATP8B3
ENSP00000311430	RPL4
ENSP00000311572	PTGR1
ENSP00000311677	PPP1R8
ENSP00000311679	ZNF483
ENSP00000311746	KLK10
ENSP00000311747	RBM14
ENSP00000311752	GRB7
ENSP00000311766	ATAD3B
ENSP00000311825	CTBP2
ENSP00000312042	HDLBP
ENSP00000312059	AGFG1
ENSP00000312066	SRP68
ENSP00000312169	NAV2
ENSP00000312185	ELMO1
ENSP00000312236	BRCA1
ENSP00000312455	CFLAR
ENSP00000312494	ENTPD2
ENSP00000312577	ATP2A3
ENSP00000312649	PPARGC1B
ENSP00000312664	CASP2
ENSP00000312735	POLR2B
ENSP00000312769	PPIE
ENSP00000312870	MCM9
ENSP00000312893	HTRA2
ENSP00000312939	KDSR
ENSP00000313007	PABPC1
ENSP00000313029	CHTF18
ENSP00000313129	TARDBP
ENSP00000313171	ATAD5
ENSP00000313199	HNRNPD
ENSP00000313272	NOP2
ENSP00000313327	HNRNPD
ENSP00000313350	RNASEH1
ENSP00000313362	MAZ
ENSP00000313437	MMP19
ENSP00000313581	KLK2
ENSP00000313600	ATP10B
ENSP00000313603	ABCF1
ENSP00000313616	MSI2
ENSP00000313624	SENP7
ENSP00000313811	USP20
ENSP00000313829	KHDRBS1
ENSP00000313875	CD46
ENSP00000313890	RBM15B
ENSP00000313978	NOL6
ENSP00000314018	R3HCC1L
ENSP00000314029	SENP3
ENSP00000314067	PAK2
ENSP00000314075	AKAP1
ENSP00000314151	KLK3
ENSP00000314295	ECE2
ENSP00000314311	LARP7
ENSP00000314348	DDX10
ENSP00000314414	AP2B1
ENSP00000314505	MCM9
ENSP00000314599	CASP10
ENSP00000314653	MARS
ENSP00000314783	KLK15
ENSP00000314792	BOLL
ENSP00000314902	TYMS
ENSP00000314949	POLR2A
ENSP00000315017	MRPL1
ENSP00000315074	CPZ
ENSP00000315147	ISYNA1
ENSP00000315152	METAP1D
ENSP00000315205	ILF3
ENSP00000315328	CELF2
ENSP00000315383	ASPRV1
ENSP00000315407	CD209
ENSP00000315477	CD209
ENSP00000315569	DIS3L2
ENSP00000315644	TYMS
ENSP00000315664	ZNF18
ENSP00000315791	CSTF3
ENSP00000315859	RNPS1
ENSP00000315900	ADAM22
ENSP00000315925	GMPPA
ENSP00000316032	NUP98
ENSP00000316042	HNRNPA0
ENSP00000316092	VARS2
ENSP00000316176	UBE2N
ENSP00000316228	CLEC4M
ENSP00000316335	FARS2
ENSP00000316357	USP9X
ENSP00000316373	DPP8
ENSP00000316454	PACS1
ENSP00000316670	DHRS9
ENSP00000316879	EIF4G1
ENSP00000316950	MYEF2
ENSP00000317214	CAPN6
ENSP00000317252	DNPEP
ENSP00000317362	PRCP
ENSP00000317600	EIF4G1
ENSP00000317691	RPP25
ENSP00000317788	HNRNPK
ENSP00000317985	ROCK2
ENSP00000318102	RBPMS
ENSP00000318111	DPP8
ENSP00000318115	TIMM50
ENSP00000318173	VPS37A
ENSP00000318177	FUBP3
ENSP00000318195	NCL
ENSP00000318297	RUVBL1
ENSP00000318322	HMGA1
ENSP00000318415	RBMXL1
ENSP00000318480	YME1L1
ENSP00000318506	DACH1
ENSP00000318585	BACE1
ENSP00000318602	PRTFDC1
ENSP00000318629	VPS37A
ENSP00000318631	HSD17B6
ENSP00000318646	RPS15A
ENSP00000319104	SUPT6H
ENSP00000319240	MAGOHB
ENSP00000319279	MALT1
ENSP00000319429	MBNL1
ENSP00000319551	RBM24
ENSP00000319690	HNRNPC
ENSP00000319730	PRSS8
ENSP00000320083	NAALAD2
ENSP00000320108	RBM47
ENSP00000320204	IGF2BP2
ENSP00000320309	FARSA
ENSP00000320324	NPEPPS
ENSP00000320416	VPS37D
ENSP00000320461	ASCC1
ENSP00000320503	EDC3
ENSP00000320557	CHFR
ENSP00000320658	YARS2
ENSP00000320810	ASCC1
ENSP00000320885	SPAST
ENSP00000321179	RBM44
ENSP00000321187	ZNF274
ENSP00000321195	ATP11B
ENSP00000321209	ZNF274
ENSP00000321334	LPA
ENSP00000321449	RRP7A
ENSP00000321583	DIS3L
ENSP00000321584	IMPDH2
ENSP00000321625	MIF4GD
ENSP00000321711	DIS3L
ENSP00000321963	ZSCAN4
ENSP00000321984	MTHFD2L
ENSP00000321997	LARP1B
ENSP00000322016	PUF60
ENSP00000322036	PUF60
ENSP00000322159	ATG4C
ENSP00000322192	PGA3
ENSP00000322234	SYNJ1
ENSP00000322341	PCBP4
ENSP00000322376	U2SURP
ENSP00000322419	RPLP2
ENSP00000322550	ADAM33
ENSP00000322570	POLE
ENSP00000322629	CTRL
ENSP00000322716	GLYR1
ENSP00000322775	RHBDF2
ENSP00000322788	MMP1
ENSP00000322872	ZKSCAN5
ENSP00000322887	CIRBP
ENSP00000323046	EXOSC3
ENSP00000323148	ZKSCAN1
ENSP00000323265	DALRD3
ENSP00000323288	RPUSD2
ENSP00000323353	UEVLD
ENSP00000323678	ZADH2
ENSP00000323681	AGBL5
ENSP00000323714	EIF4E1B
ENSP00000323737	EIF4G1
ENSP00000323750	RAD51AP1
ENSP00000323858	DDX54
ENSP00000324011	XPNPEP1
ENSP00000324122	PRPF31
ENSP00000324124	POLR2L
ENSP00000324172	ATP2B2
ENSP00000324181	KLK12
ENSP00000324203	WRAP53
ENSP00000324210	NIN
ENSP00000324269	KLK11
ENSP00000324292	FBF1
ENSP00000324328	TRDMT1
ENSP00000324392	RNF213
ENSP00000324414	KLK11
ENSP00000324438	RPS21
ENSP00000324450	ZSCAN20
ENSP00000324726	PUS1
ENSP00000324827	AKAP17A
ENSP00000324890	CD28
ENSP00000324965	DAZ3
ENSP00000325072	KLK8
ENSP00000325123	ZSCAN2
ENSP00000325153	ADAD2
ENSP00000325312	METAP2
ENSP00000325376	HNRNPM
ENSP00000325421	PARL
ENSP00000325425	MAT2B
ENSP00000325448	KARS
ENSP00000325548	CNDP2
ENSP00000325618	PARP10
ENSP00000325722	CASP8
ENSP00000325732	HNRNPM
ENSP00000325756	CNDP2
ENSP00000325905	SRSF7
ENSP00000325917	PCSK7
ENSP00000326003	PUS10
ENSP00000326128	LARP4B
ENSP00000326159	KLK4
ENSP00000326219	DHRS4
ENSP00000326261	SRRM1
ENSP00000326281	CAPN3
ENSP00000326531	THOC6
ENSP00000326581	PEG3
ENSP00000326598	PRSS50
ENSP00000326708	OVCH1
ENSP00000326731	CNOT4
ENSP00000326746	PUM2
ENSP00000326777	MTHFSD
ENSP00000326806	NCBP2
ENSP00000326900	TNRC6A
ENSP00000326981	IMP3
ENSP00000327070	MDH2
ENSP00000327080	RBM26
ENSP00000327154	TMEM63B
ENSP00000327176	ZC3H14
ENSP00000327197	SENP5
ENSP00000327214	ATP13A2
ENSP00000327386	PRSS57
ENSP00000327416	PPFIA2
ENSP00000327456	EWSR1
ENSP00000327459	APOBEC3B
ENSP00000327528	BACE2
ENSP00000327539	HNRNPH1
ENSP00000327583	RANBP1
ENSP00000327694	AP2A2
ENSP00000327704	PSMF1
ENSP00000327975	DHRS7C
ENSP00000328010	USP6
ENSP00000328023	SRPR
ENSP00000328173	C1S
ENSP00000328213	LCK
ENSP00000328226	DPP6
ENSP00000328611	LMLN
ENSP00000328641	BRCC3
ENSP00000328690	DDX24
ENSP00000328789	AP1S2
ENSP00000328813	KCNH8
ENSP00000328829	LMLN
ENSP00000328848	RBM10
ENSP00000328858	PYCR1
ENSP00000328901	GTF2H2
ENSP00000329454	RCAN2
ENSP00000329546	F7
ENSP00000329553	IMMP2L
ENSP00000329592	UPF3A
ENSP00000329659	RBM10
ENSP00000329664	ATP2C1
ENSP00000329738	ZSCAN30
ENSP00000329918	MEX3B
ENSP00000330031	PIWIL3
ENSP00000330098	FBXL6
ENSP00000330222	FAM108B1
ENSP00000330237	CASP9
ENSP00000330264	TMPRSS9
ENSP00000330330	TMPRSS2
ENSP00000330349	DDX41
ENSP00000330460	DDX59
ENSP00000330475	TMPRSS11B
ENSP00000330516	EWSR1
ENSP00000330658	PAPPA
ENSP00000330671	DNAH11
ENSP00000330812	SDR42E2
ENSP00000330813	BRAP
ENSP00000330896	EWSR1
ENSP00000330982	MTHFD2L
ENSP00000331172	CD8B
ENSP00000331211	RBM43
ENSP00000331327	WT1
ENSP00000331471	NXF2
ENSP00000331535	NXF5
ENSP00000331577	ZNF397
ENSP00000331626	ZKSCAN2
ENSP00000331636	CAPN12
ENSP00000331699	EWSR1
ENSP00000331719	PCYT2
ENSP00000331817	ALYREF
ENSP00000331831	GAS6
ENSP00000331907	DHX34
ENSP00000332052	PCSK6
ENSP00000332139	CFD
ENSP00000332265	ANKRD17
ENSP00000332340	DDX28
ENSP00000332373	SUGP2
ENSP00000332407	SDR42E1
ENSP00000332433	ZSCAN22
ENSP00000332444	CSTF2T
ENSP00000332576	OSBP2
ENSP00000332750	ZNF192
ENSP00000332756	ATP11C
ENSP00000332979	BACE2
ENSP00000333001	RBM8A
ENSP00000333003	PRSS55
ENSP00000333300	HSD17B13
ENSP00000333363	DNAH8
ENSP00000333376	USP45
ENSP00000333504	HNRNPA1
ENSP00000333811	PSMD13
ENSP00000333836	FIGN
ENSP00000333837	MRPL12
ENSP00000333854	BACE2
ENSP00000333895	ZSCAN2
ENSP00000333905	PPP2R5C
ENSP00000333926	ABCC5
ENSP00000334032	SUGP1
ENSP00000334052	LGMN
ENSP00000334058	CPEB2
ENSP00000334079	KLK13
ENSP00000334113	DHRSX
ENSP00000334308	SYNE3
ENSP00000334346	TERT
ENSP00000334414	SF1
ENSP00000334499	PTBP3
ENSP00000334522	LRP8
ENSP00000334533	CPEB4
ENSP00000334538	SREK1
ENSP00000334558	APAF1
ENSP00000334563	MYO18B
ENSP00000334611	TMPRSS11A
ENSP00000334616	ZNF197
ENSP00000334800	ZNF498
ENSP00000334801	DHRS4L2
ENSP00000334808	USP16
ENSP00000334918	FAM120A
ENSP00000334962	TMPRSS6
ENSP00000335106	KATNA1
ENSP00000335141	POLM
ENSP00000335153	HSP90AA1
ENSP00000335180	KATNA1
ENSP00000335182	CELF5
ENSP00000335294	HM13
ENSP00000335516	AGBL4
ENSP00000335631	CELF4
ENSP00000335673	TYSND1
ENSP00000336543	SNURF
ENSP00000336565	ZNF446
ENSP00000336579	PYCR1
ENSP00000336606	RAD54B
ENSP00000336666	AP1S1
ENSP00000336693	ABHD12B
ENSP00000336701	RAD51C
ENSP00000336702	EIF5A
ENSP00000336721	LARP1
ENSP00000336725	DDX3Y
ENSP00000336741	DHX15
ENSP00000336752	FIP1L1
ENSP00000336776	EIF5A
ENSP00000336783	TNRC6C
ENSP00000336792	MASP1
ENSP00000336840	CAPN3
ENSP00000337132	DAZAP1
ENSP00000337146	ENOX2
ENSP00000337363	ZNF394
ENSP00000337501	NRIP2
ENSP00000337540	KLK7
ENSP00000337632	SARNP
ENSP00000337724	ZNF202
ENSP00000337733	KLK5
ENSP00000337736	AKAP1
ENSP00000337746	ISYNA1
ENSP00000337759	DOM3Z
ENSP00000337816	MMP25
ENSP00000337825	LCK
ENSP00000337926	SUGP2
ENSP00000338002	ZC3H14
ENSP00000338020	EIF4G1
ENSP00000338039	PSMF1
ENSP00000338093	TARSL2
ENSP00000338095	HNRNPC
ENSP00000338143	SUPT6H
ENSP00000338173	PUM2
ENSP00000338218	RNF213
ENSP00000338369	CELA3B
ENSP00000338371	TNRC6B
ENSP00000338413	UBA1
ENSP00000338477	HNRNPF
ENSP00000338512	AGTPBP1
ENSP00000338552	HNRPDL
ENSP00000338615	CTBP2
ENSP00000338624	TASP1
ENSP00000338703	UGP2
ENSP00000338790	RAD51D
ENSP00000338860	ZNF444
ENSP00000338897	APOBEC3B
ENSP00000339016	ATAD1
ENSP00000339017	ATAD1
ENSP00000339027	RPLP0
ENSP00000339090	RBMX2
ENSP00000339095	RPS7
ENSP00000339157	CPM
ENSP00000339182	ATP13A4
ENSP00000339208	DPP8
ENSP00000339220	RBM23
ENSP00000339326	CFLAR
ENSP00000339335	CFLAR
ENSP00000339399	CRYZ
ENSP00000339404	ASCC1
ENSP00000339421	ATAD3A
ENSP00000339479	NT5C2
ENSP00000339485	WARS
ENSP00000339495	COBRA1
ENSP00000339532	THUMPD3
ENSP00000339585	ZNF449
ENSP00000339622	PAIP1
ENSP00000339672	MMP13
ENSP00000339744	ABCG1
ENSP00000339781	ZNF174
ENSP00000339795	RPL7
ENSP00000339845	DROSHA
ENSP00000340030	CASP2
ENSP00000340041	UBA3
ENSP00000340044	CRCP
ENSP00000340111	NAALADL1
ENSP00000340176	RBPMS
ENSP00000340215	WFDC2
ENSP00000340278	PARK7
ENSP00000340281	EIF4G2
ENSP00000340329	CAPRIN1
ENSP00000340385	CLPB
ENSP00000340427	ERMP1
ENSP00000340436	HSD11B1L
ENSP00000340441	PYCARD
ENSP00000340448	ATP8B2
ENSP00000340470	CTSL1
ENSP00000340505	SENP8
ENSP00000340523	NMNAT3
ENSP00000340584	ZBP1
ENSP00000340592	CD8B
ENSP00000340705	PTBP3
ENSP00000340760	GMPPA
ENSP00000340774	SNRNP35
ENSP00000340817	SPAST
ENSP00000340823	GTF2F2
ENSP00000340857	HNRNPUL1
ENSP00000340858	B2M
ENSP00000340889	PRSS3
ENSP00000340930	ATP2B4
ENSP00000341021	NANOS2
ENSP00000341115	ATP13A2
ENSP00000341125	OASL
ENSP00000341157	SPG7
ENSP00000341161	FBXW2
ENSP00000341168	NPM1
ENSP00000341230	DPP8
ENSP00000341285	HNRNPA1L2
ENSP00000341347	HM13
ENSP00000341362	NVL
ENSP00000341555	KLK8
ENSP00000341583	RBM33
ENSP00000341660	MRPS5
ENSP00000341689	ZNF239
ENSP00000341730	RPL10
ENSP00000341826	HNRNPA1
ENSP00000341833	ATG4A
ENSP00000341885	RPS2
ENSP00000341887	SYNE1
ENSP00000341939	KIAA0430
ENSP00000341942	ATP13A5
ENSP00000341992	NANOS3
ENSP00000342011	XRCC4
ENSP00000342070	CTSB
ENSP00000342142	ELMO1
ENSP00000342159	SENP7
ENSP00000342216	ABCA9
ENSP00000342262	NUP43
ENSP00000342278	OAS2
ENSP00000342300	TH1L
ENSP00000342332	PTBP1
ENSP00000342387	NOVA1
ENSP00000342408	CSDE1
ENSP00000342438	IMPDH1
ENSP00000342481	ATP9A
ENSP00000342502	PYCR2
ENSP00000342559	ATP7B
ENSP00000342787	RPL28
ENSP00000342809	CFLAR
ENSP00000342812	USP9Y
ENSP00000342889	POLR2K
ENSP00000342890	WFDC2
ENSP00000342913	SRSF10
ENSP00000342952	ADCY2
ENSP00000343026	ATP7A
ENSP00000343032	HM13
ENSP00000343054	RBM5
ENSP00000343081	PUS7L
ENSP00000343102	POLL
ENSP00000343200	SKOR1
ENSP00000343450	EIF4G1
ENSP00000343451	HSD11B1L
ENSP00000343488	EARS2
ENSP00000343526	USP1
ENSP00000343535	USP7
ENSP00000343557	ZCCHC17
ENSP00000343577	TPSAB1
ENSP00000343599	ATP2B1
ENSP00000343674	ASTL
ENSP00000343701	KPNA1
ENSP00000343718	RBM38
ENSP00000343745	DICER1
ENSP00000343820	ABCG1
ENSP00000343849	ABCB7
ENSP00000343854	ADAM2
ENSP00000343857	TRA2B
ENSP00000343869	LARP6
ENSP00000343886	ATP2B3
ENSP00000343900	CPSF4L
ENSP00000343943	PPOX
ENSP00000343951	ABHD12B
ENSP00000343966	PSPC1
ENSP00000343985	CCR5
ENSP00000344052	NUP54
ENSP00000344086	FOLH1
ENSP00000344089	ENTPD8
ENSP00000344103	BRCC3
ENSP00000344131	FOLH1
ENSP00000344132	CASP1
ENSP00000344149	SRSF10
ENSP00000344155	ABCA2
ENSP00000344196	RBFOX1
ENSP00000344206	RHBDL1
ENSP00000344214	MBNL2
ENSP00000344223	MBTPS1
ENSP00000344244	NAALADL1
ENSP00000344401	LIN28B
ENSP00000344410	PCSK6
ENSP00000344458	PROZ
ENSP00000344537	TAF6
ENSP00000344581	RBM39
ENSP00000344674	DHRS2
ENSP00000344677	ATP2B2
ENSP00000344698	FAM120A
ENSP00000344742	STAMBP
ENSP00000344757	VHL
ENSP00000344762	SRSF3
ENSP00000344779	RHBDD1
ENSP00000344818	UBC
ENSP00000344829	QPCT
ENSP00000344847	ADAMTS12
ENSP00000344950	LARP7
ENSP00000344954	ZBP1
ENSP00000344989	DALRD3
ENSP00000345043	USP37
ENSP00000345096	IMPDH1
ENSP00000345156	RPL14
ENSP00000345248	RBM38
ENSP00000345339	ZNF323
ENSP00000345344	CTSL1
ENSP00000345395	PAPLN
ENSP00000345404	ZNF167
ENSP00000345412	CPSF7
ENSP00000345456	PARN
ENSP00000345541	ACIN1
ENSP00000345584	PSMA8
ENSP00000345672	CTSB
ENSP00000345694	RELN
ENSP00000345728	ATP7A
ENSP00000345807	CFLAR
ENSP00000345809	ZNF197
ENSP00000345895	NUP50
ENSP00000345924	NANOS1
ENSP00000345957	RPS21
ENSP00000346001	RPL3
ENSP00000346015	RPL27A
ENSP00000346022	RPL9
ENSP00000346027	RPL21
ENSP00000346037	RPLP1
ENSP00000346045	RPS17
ENSP00000346046	RPS17L
ENSP00000346050	RPS3A
ENSP00000346067	RPSA
ENSP00000346088	RPL22
ENSP00000346120	DDX21
ENSP00000346171	MCM7
ENSP00000346206	TAP1
ENSP00000346219	IMPDH1
ENSP00000346236	DDX46
ENSP00000346240	FBXO2
ENSP00000346246	AP2A1
ENSP00000346271	RAD17
ENSP00000346321	KCNMA1
ENSP00000346373	CD209
ENSP00000346391	LRP8
ENSP00000346426	CELF2
ENSP00000346437	ATG7
ENSP00000346444	LARP1B
ENSP00000346478	ADAMTSL2
ENSP00000346538	CAPN9
ENSP00000346604	DACH1
ENSP00000346671	FYN
ENSP00000346694	HNRNPA2B1
ENSP00000346726	HNRNPH3
ENSP00000346867	RPL15
ENSP00000346874	FAR1
ENSP00000346890	NRD1
ENSP00000346917	MOV10L1
ENSP00000346938	RAD17
ENSP00000346941	BMP1
ENSP00000346952	CTSA
ENSP00000346961	STEAP3
ENSP00000346971	CELF2
ENSP00000347042	ATG7
ENSP00000347084	ENTPD6
ENSP00000347213	ENTPD2
ENSP00000347232	BLM
ENSP00000347271	RPS10
ENSP00000347359	ATP6V1H
ENSP00000347380	SYNCRIP
ENSP00000347401	NHP2L1
ENSP00000347404	NUP98
ENSP00000347409	KEL
ENSP00000347431	AKD1
ENSP00000347484	THSD4
ENSP00000347495	WARS
ENSP00000347530	NAALADL1
ENSP00000347549	CPA5
ENSP00000347637	MBNL1
ENSP00000347757	CFLAR
ENSP00000347792	SYNJ2
ENSP00000347850	ZNF397
ENSP00000347855	RBFOX1
ENSP00000347856	ADAM11
ENSP00000347872	VAT1
ENSP00000347897	RSL1D1
ENSP00000347907	FNBP1
ENSP00000347927	ADAMTS13
ENSP00000347955	NAALADL1
ENSP00000347959	THOC2
ENSP00000348003	GAS6
ENSP00000348026	STAU2
ENSP00000348066	ZNF638
ENSP00000348093	HNRNPAB
ENSP00000348107	C1D
ENSP00000348108	KHDRBS3
ENSP00000348111	PCBP4
ENSP00000348119	WWOX
ENSP00000348168	GTF2E2
ENSP00000348170	HP
ENSP00000348227	ADAM15
ENSP00000348271	DDX19B
ENSP00000348295	FYN
ENSP00000348297	AP1B1
ENSP00000348308	MMP23B
ENSP00000348345	HNRNPF
ENSP00000348395	NPEPL1
ENSP00000348442	PSMD12
ENSP00000348461	RAC1
ENSP00000348478	KATNAL2
ENSP00000348485	CNOT4
ENSP00000348538	RBM38
ENSP00000348565	UBA5
ENSP00000348578	G3BP1
ENSP00000348639	TMPRSS11F
ENSP00000348667	CAPN3
ENSP00000348708	UPF2
ENSP00000348722	PUS7
ENSP00000348849	RPS26
ENSP00000348904	PPIE
ENSP00000348912	ADAM33
ENSP00000348965	DYNC1H1
ENSP00000348984	SON
ENSP00000348997	ADAMTS13
ENSP00000349017	ABCC11
ENSP00000349045	NAALADL1
ENSP00000349094	PGC
ENSP00000349098	ZNF74
ENSP00000349101	HNRNPA2B1
ENSP00000349129	FOLH1
ENSP00000349156	SIAH1
ENSP00000349168	HNRNPH1
ENSP00000349211	PCYT1B
ENSP00000349305	GOLGA4
ENSP00000349325	ATP10A
ENSP00000349356	FIGNL1
ENSP00000349393	LIG4
ENSP00000349396	ABCD4
ENSP00000349410	NCL
ENSP00000349428	PTBP1
ENSP00000349436	ADAM15
ENSP00000349451	HPR
ENSP00000349556	CAPN10
ENSP00000349573	HNRNPF
ENSP00000349581	ECE1
ENSP00000349592	AGTPBP1
ENSP00000349594	ELAVL4
ENSP00000349595	ATP2A1
ENSP00000349658	XPNPEP3
ENSP00000349667	PSMD12
ENSP00000349721	TSG101
ENSP00000349748	SFPQ
ENSP00000349862	APAF1
ENSP00000349871	HMGA1
ENSP00000349877	ATP13A1
ENSP00000349878	HDGF
ENSP00000349903	SYNJ1
ENSP00000349924	CLEC4M
ENSP00000349962	GAS6
ENSP00000350009	USP33
ENSP00000350028	MOV10
ENSP00000350054	PAPD5
ENSP00000350064	MBNL1
ENSP00000350066	ECE2
ENSP00000350073	ACIN1
ENSP00000350090	HNRNPA1L2
ENSP00000350102	TOR4A
ENSP00000350154	DHRS9
ENSP00000350170	FXR1
ENSP00000350181	CAPN3
ENSP00000350199	AP1B1
ENSP00000350221	UPF2
ENSP00000350228	AGBL2
ENSP00000350283	BRCA1
ENSP00000350310	ATP2B4
ENSP00000350352	TRMT1
ENSP00000350409	UNC50
ENSP00000350413	THSD4
ENSP00000350512	COPS5
ENSP00000350518	G3BP2
ENSP00000350541	LVRN
ENSP00000350630	TLL2
ENSP00000350698	DDX47
ENSP00000350725	RAD17
ENSP00000350748	KLK2
ENSP00000350820	MTPAP
ENSP00000350871	ZNF483
ENSP00000350877	SRSF2
ENSP00000350911	CTSE
ENSP00000350914	BDH1
ENSP00000350936	SENP7
ENSP00000350949	GMPPA
ENSP00000351021	RPL21
ENSP00000351027	TRDMT1
ENSP00000351035	HSD17B11
ENSP00000351108	HNRNPAB
ENSP00000351122	USP20
ENSP00000351124	POM121
ENSP00000351136	HNRPLL
ENSP00000351168	ESRP1
ENSP00000351172	ABCB4
ENSP00000351193	PCSK6
ENSP00000351273	CASP8
ENSP00000351314	PSMB10
ENSP00000351329	CSDE1
ENSP00000351409	CELF1
ENSP00000351416	ANKRD17
ENSP00000351417	OMA1
ENSP00000351481	WARS
ENSP00000351484	NAALADL1
ENSP00000351640	KLK10
ENSP00000351682	CNDP1
ENSP00000351697	REV3L
ENSP00000351717	ABCB8
ENSP00000351723	NOL8
ENSP00000351777	VCP
ENSP00000351817	DPP8
ENSP00000351823	RBMY1E
ENSP00000351834	AASS
ENSP00000351851	NUMA1
ENSP00000351883	ZSCAN5B
ENSP00000351926	AP2A1
ENSP00000351954	CLEC4M
ENSP00000351990	NAE1
ENSP00000352012	MTHFD2L
ENSP00000352041	PIGK
ENSP00000352052	ECE2
ENSP00000352054	ATP2B1
ENSP00000352062	ATP2B3
ENSP00000352091	NUP98
ENSP00000352117	SUPT5H
ENSP00000352135	ABCB4
ENSP00000352162	ELAVL3
ENSP00000352177	ADAM29
ENSP00000352219	BCS1L
ENSP00000352226	ADAM15
ENSP00000352228	PCBP2
ENSP00000352250	ZC3H14
ENSP00000352257	XRCC6
ENSP00000352308	DDX42
ENSP00000352312	DNAH8
ENSP00000352328	RBFOX2
ENSP00000352400	NUP214
ENSP00000352438	PCBP2
ENSP00000352516	DNMT1
ENSP00000352522	ATP6V1H
ENSP00000352612	ELAVL2
ENSP00000352639	CELA2A
ENSP00000352665	ATP2C1
ENSP00000352668	RBM12
ENSP00000352678	SUPV3L1
ENSP00000352712	DACH1
ENSP00000352715	ATP11C
ENSP00000352738	G3BP2
ENSP00000352904	NT5C1B
ENSP00000352911	NUDT16
ENSP00000352956	RBM23
ENSP00000352976	AMZ2
ENSP00000353015	MPND
ENSP00000353059	APAF1
ENSP00000353072	ATP2A3
ENSP00000353089	SRSF2
ENSP00000353192	XRCC6
ENSP00000353224	TFRC
ENSP00000353249	AGBL5
ENSP00000353250	CASP10
ENSP00000353284	DDX3Y
ENSP00000353350	CTSE
ENSP00000353355	AARSD1
ENSP00000353409	UAP1L1
ENSP00000353414	ATP2B2
ENSP00000353552	HNRNPK
ENSP00000353575	EIF2B3
ENSP00000353584	DIS3L2
ENSP00000353638	PPARGC1B
ENSP00000353663	RBM42
ENSP00000353679	MME
ENSP00000353701	DPP3
ENSP00000353731	DPP4
ENSP00000353741	ETF1
ENSP00000353767	MMP17
ENSP00000353769	SCAF1
ENSP00000353826	LONP1
ENSP00000353829	KLK3
ENSP00000353871	NAV2
ENSP00000353892	ADAM15
ENSP00000353920	ADARB1
ENSP00000354021	HNRNPA2B1
ENSP00000354057	C1S
ENSP00000354074	RPS24
ENSP00000354085	ANKHD1
ENSP00000354115	NOL8
ENSP00000354125	EIF3B
ENSP00000354152	MTHFSD
ENSP00000354162	DAAM1
ENSP00000354255	CPZ
ENSP00000354280	PRSS3
ENSP00000354294	CTRB1
ENSP00000354305	ZSCAN12
ENSP00000354329	RBMY1A1
ENSP00000354337	CTSE
ENSP00000354340	UBA3
ENSP00000354346	MATR3
ENSP00000354370	PUM2
ENSP00000354436	PAPSS2
ENSP00000354437	RBM39
ENSP00000354486	GOLGA4
[truncated: 4,987 more rows]

## Sheet: RSV Target Human Protein list
RSV Target Human Protein list		Target Human proteins are human proteins interacted with RSV virus proteins based on the rule of shared GO terms (only GO terms at levels higher than 3 were considered)
Protein	Gene
ENSP00000000233	ARF5
ENSP00000000412	M6PR
ENSP00000000442	ESRRA
ENSP00000001008	FKBP4
ENSP00000002501	DBNDD1
ENSP00000002596	HS3ST1
ENSP00000003084	CFTR
ENSP00000003100	CYP51A1
ENSP00000003912	NIPAL3
ENSP00000004103	TMEM176A
ENSP00000004531	SLC7A2
ENSP00000004980	SENP1
ENSP00000004982	HSPB6
ENSP00000005082	ZNF195
ENSP00000005178	PDK4
ENSP00000005226	USH1C
ENSP00000005259	BCAP29
ENSP00000005260	BAIAP2L1
ENSP00000005279	SYNRG
ENSP00000005286	TMEM132A
ENSP00000005340	DVL2
ENSP00000005587	SKAP2
ENSP00000005756	UPP2
ENSP00000005995	PRSS21
ENSP00000006015	HOXA11
ENSP00000006053	CX3CL1
ENSP00000006724	CEACAM7
ENSP00000006750	CD79B
ENSP00000006777	RHBDD2
ENSP00000006967	JHDM1D
ENSP00000007699	YBX2
ENSP00000007708	PDK2
ENSP00000008686	MYLIP
ENSP00000008876	MAPK8IP2
ENSP00000008938	PGLYRP1
ENSP00000009041	STARD3NL
ENSP00000009105	CAMK1G
ENSP00000009180	CD9
ENSP00000009530	CD74
ENSP00000009589	RPS20
ENSP00000010132	DYRK4
ENSP00000010338	TRAF3IP3
ENSP00000010404	MGST1
ENSP00000011292	CPA1
ENSP00000011473	SYPL1
ENSP00000011619	RANBP9
ENSP00000011653	CD4
ENSP00000011684	PLEKHG6
ENSP00000011898	TSPAN9
ENSP00000012049	QPCTL
ENSP00000012134	HIVEP2
ENSP00000012443	PPP5C
ENSP00000013034	NME1
ENSP00000013070	UBR7
ENSP00000013125	MAP4K5
ENSP00000013222	INMT
ENSP00000013807	ERCC1
ENSP00000014112	PTBP1
ENSP00000014914	GPRC5A
ENSP00000016171	COX15
ENSP00000016913	MS4A12
ENSP00000016946	RGPD5
ENSP00000017003	XYLT2
ENSP00000019019	FTSJ1
ENSP00000019103	SCTR
ENSP00000020673	PSD
ENSP00000020945	SNAI2
ENSP00000023897	GABRA1
ENSP00000024061	SLC45A4
ENSP00000025301	AKAP11
ENSP00000025399	STRAP
ENSP00000025469	PLEKHO1
ENSP00000026218	PIGQ
ENSP00000027335	CDH17
ENSP00000029410	B4GALT7
ENSP00000031135	BCLAF1
ENSP00000034275	RANBP3
ENSP00000035307	CHPF2
ENSP00000035383	LRRC7
ENSP00000037243	GABARAPL2
ENSP00000037869	FAM136A
ENSP00000038176	NSMAF
ENSP00000039007	OTC
ENSP00000040663	MRI1
ENSP00000042381	FAM65A
ENSP00000044462	PSMA4
ENSP00000046640	CTNS
ENSP00000046894	TRIT1
ENSP00000050961	ZFHX4
ENSP00000052569	GOPC
ENSP00000053243	TNFRSF17
ENSP00000054216	KITLG
ENSP00000054650	THAP3
ENSP00000054666	VAMP3
ENSP00000055077	RFC2
ENSP00000055335	PPP1R3F
ENSP00000056217	ARHGEF5
ENSP00000058691	HEBP2
ENSP00000061240	TLL1
ENSP00000062104	NNAT
ENSP00000064724	CLDN11
ENSP00000064780	RELT
ENSP00000066544	CDC27
ENSP00000070846	PKP2
ENSP00000071281	FHL1
ENSP00000072644	YIPF1
ENSP00000072869	ADCK2
ENSP00000075120	SLC2A3
ENSP00000075322	ENPP2
ENSP00000075503	STYK1
ENSP00000078429	GNA11
ENSP00000078445	CREB3L3
ENSP00000078527	PIGV
ENSP00000080059	HDAC7
ENSP00000082259	DNAH2
ENSP00000083182	APPBP2
ENSP00000085068	ISOC2
ENSP00000085079	EPN1
ENSP00000155093	ZFY
ENSP00000155858	TRPM5
ENSP00000155926	TRIB2
ENSP00000156109	GPKOW
ENSP00000156476	KLK13
ENSP00000156825	MBD3
ENSP00000157600	LMCD1
ENSP00000157812	PSMC4
ENSP00000158166	CAMKK1
ENSP00000158762	ACAP1
ENSP00000159060	NOX3
ENSP00000159111	KDM4B
ENSP00000159647	PANX2
ENSP00000160298	CAMSAP3
ENSP00000160382	ACTL6B
ENSP00000160827	KIF22
ENSP00000161559	CEACAM1
ENSP00000161863	YTHDC2
ENSP00000162044	TMEM161A
ENSP00000162330	BCAR1
ENSP00000163416	GOLGA5
ENSP00000164024	CELSR3
ENSP00000164133	PPP2R5B
ENSP00000164139	PYGM
ENSP00000164227	BCL3
ENSP00000164247	KCNAB2
ENSP00000164305	PIGB
ENSP00000165524	PRLH
ENSP00000165698	REEP1
ENSP00000166244	EPHA8
ENSP00000166345	TRIP13
ENSP00000167106	VASH1
ENSP00000167218	PDCD2
ENSP00000167462	LLGL2
ENSP00000167586	KRT14
ENSP00000167588	KRT20
ENSP00000167825	ARHGEF10L
ENSP00000168216	HSD17B10
ENSP00000168977	NMRK2
ENSP00000169551	TIMM21
ENSP00000170168	REXO1
ENSP00000170447	MKRN2
ENSP00000170564	GPATCH1
ENSP00000170630	IL4R
ENSP00000171111	KEAP1
ENSP00000171214	RDH8
ENSP00000171757	P2RY10
ENSP00000171887	TNS1
ENSP00000172229	NGFR
ENSP00000173229	NTN1
ENSP00000173898	TRO
ENSP00000174621	TRPV1
ENSP00000175091	LAPTM4A
ENSP00000175238	ADAM7
ENSP00000175506	ASNS
ENSP00000175756	PTPN18
ENSP00000176183	DRD4
ENSP00000176643	ALDH3A2
ENSP00000176763	STK10
ENSP00000177648	ALPK1
ENSP00000178638	CA12
ENSP00000178640	MAP2K5
ENSP00000179765	BAZ2A
ENSP00000179882	STXBP5
ENSP00000181383	CPB2
ENSP00000181839	CDK13
ENSP00000182290	TSPAN32
ENSP00000182377	FAR2
ENSP00000182527	TRAM2
ENSP00000183605	CLDN18
ENSP00000183936	CAPN3
ENSP00000184266	NDUFB4
ENSP00000185942	HMMR
ENSP00000186436	TMEM131
ENSP00000187397	ARPP21
ENSP00000187608	CEACAM21
ENSP00000187762	TMEM38A
ENSP00000187879	ZNF222
ENSP00000188312	ACTR6
ENSP00000188403	NR1H4
ENSP00000188790	FAP
ENSP00000189444	NFKB2
ENSP00000189978	MUSK
ENSP00000190983	WISP2
ENSP00000192314	GAL3ST2
ENSP00000193029	MOK
ENSP00000193322	OSTM1
ENSP00000193391	IMPG2
ENSP00000193403	ACTN1
ENSP00000194130	SLC13A1
ENSP00000194152	PCDHB4
ENSP00000194155	PCDHB2
ENSP00000194530	STRADB
ENSP00000194900	DLG3
ENSP00000195173	SEMA5B
ENSP00000196169	TDRD3
ENSP00000196482	ZNF324
ENSP00000196489	ZNF416
ENSP00000196548	ZNF8
ENSP00000197268	KIAA1467
ENSP00000198536	PILRA
ENSP00000198765	CPNE3
ENSP00000198801	MOGAT2
ENSP00000198939	CHERP
ENSP00000199280	AQP2
ENSP00000199389	EIF2AK1
ENSP00000199447	NME8
ENSP00000199706	MRPL28
ENSP00000199814	RBM22
ENSP00000199936	HSD17B2
ENSP00000199940	MAP2
ENSP00000200181	ITGB4
ENSP00000200457	TRIP6
ENSP00000200557	ADAM11
ENSP00000200639	LAMP2
ENSP00000200652	SLC22A4
ENSP00000200691	MT3
ENSP00000201015	PTHLH
ENSP00000201586	SULT2B1
ENSP00000201647	EPS8L1
ENSP00000201963	DNMT3B
ENSP00000201979	REM1
ENSP00000202028	EPB41L1
ENSP00000202556	PPP1R13B
ENSP00000202578	SIGLEC1
ENSP00000202677	RALGAPA2
ENSP00000202788	MAPKAPK5
ENSP00000202831	SLC24A6
ENSP00000202834	TMEM230
ENSP00000202917	OAS1
ENSP00000202967	SIRT4
ENSP00000203407	UQCRC1
ENSP00000203629	LAG3
ENSP00000203630	MLF2
ENSP00000203786	ARHGAP4
ENSP00000204566	SPG21
ENSP00000204637	FLT3LG
ENSP00000204801	CD209
ENSP00000204961	EFNB1
ENSP00000205061	GLG1
ENSP00000205143	DLL3
ENSP00000205194	NAT14
ENSP00000205214	AASDH
ENSP00000205402	DLD
ENSP00000205557	ABCC6
ENSP00000205636	CMTM6
ENSP00000205890	MYO15A
ENSP00000206020	SPAG7
ENSP00000206249	ESR1
ENSP00000206262	RGS17
ENSP00000206380	TMEM101
ENSP00000206451	PSME1
ENSP00000206544	SLC22A17
ENSP00000206595	G2E3
ENSP00000207726	MICAL3
ENSP00000207870	XYLB
ENSP00000209540	OR1I1
ENSP00000209665	ADH7
ENSP00000209668	ADH1A
ENSP00000209728	CDC6
ENSP00000209873	AAAS
ENSP00000209875	CBX5
ENSP00000209884	KLHL20
ENSP00000209929	FMO2
ENSP00000210187	RAB26
ENSP00000210227	PTBP3
ENSP00000210444	NANS
ENSP00000210633	SEMA4G
ENSP00000211287	MAPK13
ENSP00000211314	TMEM14A
ENSP00000211372	RPS18
ENSP00000211377	GPANK1
ENSP00000211379	BAG6
ENSP00000211402	VARS
ENSP00000211413	PRRT1
ENSP00000211936	ZNF184
ENSP00000212015	SIRT1
ENSP00000212355	TGFBR3
ENSP00000212369	SH3GLB1
ENSP00000214869	TMED1
ENSP00000215057	MZF1
ENSP00000215071	PSMD8
ENSP00000215375	ATP5D
ENSP00000215376	C19orf26
ENSP00000215473	PCDH11Y
ENSP00000215531	C19orf77
ENSP00000215555	2014-03-02
ENSP00000215567	TECR
ENSP00000215570	TIMM13
ENSP00000215574	CDC34
ENSP00000215587	POLR2E
ENSP00000215637	MADCAM1
ENSP00000215659	MAPK12
ENSP00000215730	SNAP29
ENSP00000215742	THAP7
ENSP00000215743	MMP11
ENSP00000215754	MIF
ENSP00000215770	DDTL
ENSP00000215773	DDT
ENSP00000215780	GSTT2
ENSP00000215798	RNF215
ENSP00000215812	SEC14L3
ENSP00000215829	SNRPD3
ENSP00000215832	MAPK1
ENSP00000215862	MORC2
ENSP00000215882	SLC25A1
ENSP00000215909	LGALS1
ENSP00000215912	PIK3IP1
ENSP00000215919	PATZ1
ENSP00000215941	ANKRD54
ENSP00000215957	MICALL1
ENSP00000216014	KDELR3
ENSP00000216024	DMC1
ENSP00000216027	HSCB
ENSP00000216034	TOMM22
ENSP00000216038	C22orf28
ENSP00000216061	PPP6R2
ENSP00000216064	SUN2
ENSP00000216068	DNAL4
ENSP00000216075	MIOX
ENSP00000216080	LMF2
ENSP00000216085	RHBDD3
ENSP00000216099	APOBEC3D
ENSP00000216115	BIK
ENSP00000216122	MCM5
ENSP00000216123	APOBEC3H
ENSP00000216139	ACR
ENSP00000216144	CABP7
ENSP00000216155	SYNGR1
ENSP00000216180	PNPLA3
ENSP00000216181	MYH9
ENSP00000216194	ADSL
ENSP00000216200	PVALB
ENSP00000216211	UPK3A
ENSP00000216214	FAM118A
ENSP00000216218	ST13
ENSP00000216225	RBX1
ENSP00000216237	L3MBTL2
ENSP00000216259	PMM1
ENSP00000216264	CERK
ENSP00000216267	BRD1
ENSP00000216268	ZBED4
ENSP00000216271	HDAC10
ENSP00000216274	RIPK3
ENSP00000216277	PAPOLA
ENSP00000216281	HSP90AA1
ENSP00000216288	MARK3
ENSP00000216338	GZMH
ENSP00000216341	GZMB
ENSP00000216350	PRMT5
ENSP00000216378	CDKL1
ENSP00000216392	PYGL
ENSP00000216416	CNIH
ENSP00000216420	CGRRF1
ENSP00000216446	PLEK2
ENSP00000216452	PIGH
ENSP00000216455	PSMA3
ENSP00000216456	VTI1B
ENSP00000216465	GSTZ1
ENSP00000216468	TMED8
ENSP00000216479	AHSA1
ENSP00000216484	SPTLC2
ENSP00000216540	SLC10A1
ENSP00000216554	EIF5
ENSP00000216568	SLC8A3
ENSP00000216605	MTHFD1
ENSP00000216629	BDKRB1
ENSP00000216639	VRK1
ENSP00000216658	PAPLN
ENSP00000216714	APEX1
ENSP00000216727	PABPN1
ENSP00000216733	EFS
ENSP00000216774	SRP54
ENSP00000216797	NFKBIA
ENSP00000216832	PNN
ENSP00000216840	RABGGTA
ENSP00000216911	AURKA
ENSP00000216923	ZFP64
ENSP00000216927	SIRPG
ENSP00000216951	GSS
ENSP00000216962	PYGB
ENSP00000217073	PABPC1L
ENSP00000217074	PABPC1L
ENSP00000217086	SALL4
ENSP00000217130	ZNF512B
ENSP00000217133	TUBB1
ENSP00000217159	SLCO4A1
ENSP00000217169	BIRC7
ENSP00000217173	UBOX5
ENSP00000217182	EEF1A2
ENSP00000217185	PTK6
ENSP00000217188	SRMS
ENSP00000217233	TRIB3
ENSP00000217244	CSNK2A1
ENSP00000217270	PROKR2
ENSP00000217299	XKR7
ENSP00000217315	TM9SF4
ENSP00000217372	CDK5RAP1
ENSP00000217381	SNTA1
ENSP00000217386	OXT
ENSP00000217420	SLC32A1
ENSP00000217426	AHCY
ENSP00000217429	FAM83D
ENSP00000217446	PIGU
ENSP00000217456	C20orf3
ENSP00000217515	TXNL1
ENSP00000217740	RNF125
ENSP00000217885	NOX1
ENSP00000217901	IDH3G
ENSP00000217909	SLC25A43
ENSP00000217957	VSIG1
ENSP00000217958	PSMD10
ENSP00000217961	STS
ENSP00000217971	PGRMC1
ENSP00000218004	NXT2
ENSP00000218006	GUCY2F
ENSP00000218032	TLR8
ENSP00000218056	WDR13
ENSP00000218075	GLRA2
ENSP00000218104	ABCD1
ENSP00000218147	BCORL1
ENSP00000218197	SLC25A14
ENSP00000218224	PQBP1
ENSP00000218246	TAZ
ENSP00000218316	GPR50
ENSP00000218340	RP2
ENSP00000218343	PHF16
ENSP00000218348	USP11
ENSP00000218364	HTATSF1
ENSP00000218432	PIN4
ENSP00000218516	GLA
ENSP00000218548	ATP12A
ENSP00000218652	NDFIP2
ENSP00000218721	MLNR
ENSP00000218758	ACP5
ENSP00000218867	SGCG
ENSP00000219054	ACSM2A
ENSP00000219069	ZNF263
ENSP00000219070	MMP2
ENSP00000219091	ZNF205
ENSP00000219150	CORO1A
ENSP00000219162	MT4
ENSP00000219207	PLLP
ENSP00000219240	DHODH
ENSP00000219252	POLR2C
ENSP00000219255	PARD6A
ENSP00000219271	MMP15
ENSP00000219301	PRSS54
ENSP00000219302	NME3
ENSP00000219320	SLC38A7
ENSP00000219322	HAS3
ENSP00000219343	SLC7A6
ENSP00000219368	FA2H
ENSP00000219409	ARHGDIG
ENSP00000219473	USP10
ENSP00000219476	TSC2
ENSP00000219478	ZNF500
ENSP00000219479	NME4
ENSP00000219535	FAM173A
ENSP00000219548	STUB1
ENSP00000219551	RHBDL1
ENSP00000219593	ZP2
ENSP00000219596	MEFV
ENSP00000219599	CRYM
ENSP00000219611	SOLH
ENSP00000219782	MAZ
ENSP00000219789	CDIPT
ENSP00000219794	BCKDK
ENSP00000219821	TMC5
ENSP00000219833	SLC6A2
ENSP00000219919	AQP9
ENSP00000220003	CSK
ENSP00000220244	KIAA1199
ENSP00000220325	EHD4
ENSP00000220419	TGM5
ENSP00000220420	TGM5
ENSP00000220496	DNAJC17
ENSP00000220562	EXTL3
ENSP00000220584	FDFT1
ENSP00000220592	EIF2C2
ENSP00000220597	PAG1
ENSP00000220659	BRF2
ENSP00000220669	ZFAND1
ENSP00000220676	RP1
ENSP00000220751	RIPK2
ENSP00000220763	CPQ
ENSP00000220764	DECR1
ENSP00000220809	PLAT
ENSP00000220847	PHF20L1
ENSP00000220849	EIF3E
ENSP00000220888	TRPS1
ENSP00000220959	UBR5
ENSP00000221086	MTMR9
ENSP00000221130	GSR
ENSP00000221132	TNFRSF10A
ENSP00000221138	PPP2CB
ENSP00000221232	CNOT3
ENSP00000221233	EXOSC5
ENSP00000221249	PNPLA6
ENSP00000221264	PLAUR
ENSP00000221307	CYP4F3
ENSP00000221315	ZNF432
ENSP00000221327	ZNF180
ENSP00000221347	FCGBP
ENSP00000221355	ZNF780B
ENSP00000221363	MAN2B1
ENSP00000221399	TULP2
ENSP00000221413	RUVBL2
ENSP00000221419	HNRNPL
ENSP00000221431	FBXO17
ENSP00000221448	SNRNP70
ENSP00000221466	FCGRT
ENSP00000221476	CKM
ENSP00000221480	PEX11G
ENSP00000221481	ERCC2
ENSP00000221485	SLC17A7
ENSP00000221486	RNASEH2A
ENSP00000221494	SF3A2
ENSP00000221496	AMH
ENSP00000221504	TRMT1
ENSP00000221566	SGTA
ENSP00000221665	FIZ1
ENSP00000221700	CYP4F2
ENSP00000221722	ZIM2
ENSP00000221735	ZNF419
ENSP00000221740	CASP14
ENSP00000221784	PDCD5
ENSP00000221803	DYRK1B
ENSP00000221855	TBCB
ENSP00000221856	FSD1
ENSP00000221859	POLR2I
ENSP00000221891	APLP1
ENSP00000221930	TGFB1
ENSP00000221957	PLIN3
ENSP00000221972	CD79A
ENSP00000221973	LIM2
ENSP00000222005	CDC37
ENSP00000222008	RABAC1
ENSP00000222032	CNFN
ENSP00000222033	ZNRF4
ENSP00000222107	SIGLEC5
ENSP00000222120	RAB3D
ENSP00000222125	CAPS
ENSP00000222139	EPOR
ENSP00000222190	WDR83OS
ENSP00000222248	SLC5A5
ENSP00000222249	KCNN1
ENSP00000222256	RAB3A
ENSP00000222270	MLL4
ENSP00000222275	UPK1A
ENSP00000222284	TMEM147
ENSP00000222286	GAPDHS
ENSP00000222304	HAMP
ENSP00000222330	GSK3A
ENSP00000222339	ZNF574
ENSP00000222374	CADM4
ENSP00000222388	ABCF2
ENSP00000222402	UBE2D4
ENSP00000222462	WNT16
ENSP00000222481	CPA2
ENSP00000222482	CPA4
ENSP00000222511	GTPBP10
ENSP00000222547	BET1
ENSP00000222553	NAMPT
ENSP00000222584	SP4
ENSP00000222597	CBLL1
ENSP00000222598	DLX5
ENSP00000222693	CAV2
ENSP00000222747	TSPAN12
ENSP00000222812	STX1A
ENSP00000222823	NOD1
ENSP00000223023	WASL
ENSP00000223026	HYAL4
ENSP00000223051	TFR2
ENSP00000223054	MOSPD3
ENSP00000223073	RBM28
ENSP00000223114	MOGAT3
ENSP00000223122	C1GALT1
ENSP00000223129	RPA3
ENSP00000223145	GLCCI1
ENSP00000223190	NRF1
ENSP00000223210	ZNF862
ENSP00000223215	MEST
ENSP00000223293	GIMAP2
ENSP00000223336	C7orf44
ENSP00000223357	AEBP1
ENSP00000223366	GCK
ENSP00000223369	YKT6
ENSP00000223423	PTGS1
ENSP00000223428	ZNF510
ENSP00000223459	ZNF688
ENSP00000223528	FKTN
ENSP00000223641	SEC61B
ENSP00000223836	AK1
ENSP00000223951	ELAVL2
ENSP00000224073	EDF1
ENSP00000224140	SETX
ENSP00000224237	VIM
ENSP00000224652	ATE1
ENSP00000224721	CDH23
ENSP00000224764	BMPR1A
ENSP00000224784	ACTA2
ENSP00000224807	SFXN3
ENSP00000224862	FBXL15
ENSP00000224949	PITRM1
ENSP00000224950	OBFC1
ENSP00000225245	CCL3
ENSP00000225282	NSF
ENSP00000225296	DHX33
ENSP00000225308	SLC25A39
ENSP00000225328	P2RX5
ENSP00000225387	CRYBA1
ENSP00000225388	NUFIP2
ENSP00000225394	GIT1
ENSP00000225396	TADA2A
ENSP00000225402	AATF
ENSP00000225504	SUPT4H1
ENSP00000225512	WNT3
ENSP00000225519	SHPK
ENSP00000225525	TAX1BP3
ENSP00000225538	P2RX1
ENSP00000225567	GOSR2
ENSP00000225576	FAM18B2
ENSP00000225577	RPS6KB1
ENSP00000225609	PIGL
ENSP00000225614	GALK1
ENSP00000225655	PFN1
ENSP00000225688	RASD1
ENSP00000225698	C1QBP
ENSP00000225719	CPD
ENSP00000225724	GOSR1
ENSP00000225726	CCDC47
ENSP00000225729	DRG2
ENSP00000225737	AKAP10
ENSP00000225740	ALDH3A1
ENSP00000225792	DDX5
ENSP00000225823	ASIC2
ENSP00000225831	CCL2
ENSP00000225873	PEX12
ENSP00000225929	HSD17B1
ENSP00000225941	ABI3
ENSP00000225964	COL1A1
ENSP00000225972	LRRC59
ENSP00000225983	HDAC5
ENSP00000226105	RANGRF
ENSP00000226207	MYH1
ENSP00000226209	MYH3
ENSP00000226225	TNFAIP1
ENSP00000226230	TMEM97
ENSP00000226253	ALDOC
ENSP00000226259	RAB34
ENSP00000226279	CD38
ENSP00000226299	LAP3
ENSP00000226319	PHF17
ENSP00000226359	AFP
ENSP00000226413	GNRHR
ENSP00000226432	CWH43
ENSP00000226444	SULT1E1
ENSP00000226574	NFKB1
ENSP00000226725	KLHL2
ENSP00000227135	SPA17
ENSP00000227155	CD82
ENSP00000227214	PLEKHB1
ENSP00000227251	CRYAB
ENSP00000227322	ZNF259
ENSP00000227348	CRTAM
ENSP00000227378	HSPA8
ENSP00000227451	DTX4
ENSP00000227471	UNC93B1
ENSP00000227503	SF1
ENSP00000227507	CCND1
ENSP00000227524	PRPF19
ENSP00000227525	TMEM109
ENSP00000227638	PANX1
ENSP00000227752	IL10RA
ENSP00000227756	GALNTL4
ENSP00000227758	BIRC2
ENSP00000227880	SLC15A3
ENSP00000228027	DGAT2
ENSP00000228245	TULP3
ENSP00000228251	CSDA
ENSP00000228264	DDX11
ENSP00000228280	KITLG
ENSP00000228284	SART3
ENSP00000228289	ZNF268
ENSP00000228307	PXN
ENSP00000228318	SLC25A3
ENSP00000228327	NAV3
ENSP00000228437	PRDM4
ENSP00000228463	SELPLG
ENSP00000228495	KCTD10
ENSP00000228506	MLEC
ENSP00000228510	MVK
ENSP00000228567	SYT10
ENSP00000228606	CYP27B1
ENSP00000228682	GLI1
ENSP00000228740	LTA4H
ENSP00000228825	ARPC3
ENSP00000228862	DUSP16
ENSP00000228872	CDKN1B
ENSP00000228887	GPRC5D
ENSP00000228916	SCNN1A
ENSP00000228918	LTBR
ENSP00000228928	OAS3
ENSP00000228945	ARHGDIB
ENSP00000228955	GTF2H3
ENSP00000228958	EIF2B1
ENSP00000229003	ENDOU
ENSP00000229022	VDR
ENSP00000229030	FZD10
ENSP00000229043	RFC5
ENSP00000229214	KRR1
ENSP00000229239	GAPDH
ENSP00000229251	COPS7A
ENSP00000229266	CHPT1
ENSP00000229268	USP5
ENSP00000229304	APOBEC1
ENSP00000229314	GOLT1B
ENSP00000229319	LDHB
ENSP00000229330	HCFC2
ENSP00000229335	AICDA
ENSP00000229340	RAB35
ENSP00000229390	SRSF9
ENSP00000229395	FGFR1OP2
ENSP00000229402	KLRB1
ENSP00000229416	GCLC
ENSP00000229446	BCLAF1
ENSP00000229470	FYN
ENSP00000229471	FYN
ENSP00000229554	RSPH4A
ENSP00000229563	TMEM14C
ENSP00000229570	C6orf162
ENSP00000229583	ADTRP
ENSP00000229633	HINT3
ENSP00000229729	SLC44A4
ENSP00000229758	FBXO5
ENSP00000229768	OPRM1
ENSP00000229771	TULP1
ENSP00000229794	MAPK14
ENSP00000229795	MAPK14
ENSP00000229810	RHAG
ENSP00000229812	STK38
ENSP00000229824	RAB44
ENSP00000229829	HLA-DOA
ENSP00000229854	MCM3
ENSP00000229866	RNF8
ENSP00000229903	SAYSD1
ENSP00000229913	KIF6
ENSP00000229955	GPR63
ENSP00000229971	FBXL4
ENSP00000230036	GPLD1
ENSP00000230053	B3GAT2
ENSP00000230056	GMNN
ENSP00000230085	SNX3
ENSP00000230099	TRIM38
ENSP00000230122	ZBTB24
ENSP00000230173	GPR126
ENSP00000230221	OR14J1
ENSP00000230223	OR5V1
ENSP00000230256	UNC93A
ENSP00000230321	MDFI
ENSP00000230323	TFEB
ENSP00000230340	BYSL
ENSP00000230354	TBP
ENSP00000230381	PRPH2
ENSP00000230418	PTK7
ENSP00000230419	PTK7
ENSP00000230431	C6orf108
ENSP00000230461	TMEM30A
ENSP00000230510	TTK
ENSP00000230565	ENPP5
ENSP00000230588	MEP1A
ENSP00000230640	SKIV2L2
ENSP00000230658	ISL1
ENSP00000230671	SLC6A7
ENSP00000230685	CD74
ENSP00000230771	HARS2
ENSP00000230882	GHR
ENSP00000230993	SLC4A9
ENSP00000231021	CDH9
ENSP00000231061	SPARC
ENSP00000231121	HAND1
ENSP00000231130	PCDHB3
ENSP00000231134	PCDHB5
ENSP00000231136	PCDHB6
ENSP00000231137	PCDHB7
ENSP00000231188	GRM6
ENSP00000231198	THG1L
ENSP00000231228	IL12B
ENSP00000231368	LNPEP
ENSP00000231423	PRLR
ENSP00000231509	NR3C1
ENSP00000231512	C5orf15
ENSP00000231524	TRIM23
ENSP00000231572	RARS
ENSP00000231668	BNIP1
ENSP00000231683	HRH2
ENSP00000231706	SLC7A14
ENSP00000231749	ZMYND10
ENSP00000231751	LTF
ENSP00000231790	MLH1
ENSP00000231803	FGFR3
ENSP00000231887	EHHADH
ENSP00000231948	CRBN
ENSP00000232003	HRG
ENSP00000232014	BCL6
ENSP00000232165	UBE3A
ENSP00000232219	RBP1
ENSP00000232375	PFKFB4
ENSP00000232424	HES1
ENSP00000232447	FLNB
ENSP00000232458	ECT2
ENSP00000232461	GNAT1
ENSP00000232501	NPRL2
ENSP00000232508	CYB561D2
ENSP00000232603	MORC1
ENSP00000232607	UMPS
ENSP00000232744	ABTB1
ENSP00000232854	HEMK1
ENSP00000232892	AADAC
ENSP00000232974	ZBTB47
ENSP00000233025	SPCS1
ENSP00000233027	NEK4
ENSP00000233047	TMEM159
ENSP00000233055	WDFY1
ENSP00000233057	EIF2AK2
ENSP00000233072	CPS1
ENSP00000233078	DAZAP1
ENSP00000233084	DDX1
ENSP00000233114	MDH1
ENSP00000233121	MAPRE3
ENSP00000233143	TMSB10
ENSP00000233146	MSH2
ENSP00000233154	NCK2
ENSP00000233331	INO80B
ENSP00000233336	TTL
ENSP00000233468	AC008073.5
ENSP00000233535	SLC30A3
ENSP00000233545	MPV17
ENSP00000233552	EIF2B4
ENSP00000233557	NRBP1
ENSP00000233575	SNX17
ENSP00000233596	REEP6
ENSP00000233607	APC2
ENSP00000233616	MOGS
ENSP00000233630	PCGF1
ENSP00000233638	TLX2
ENSP00000233710	ACADL
ENSP00000233712	FAM176A
ENSP00000233714	LANCL1
ENSP00000233741	FANCL
ENSP00000233826	KCNJ13
ENSP00000233838	GGCX
ENSP00000233840	NEU2
ENSP00000233892	MOB4
ENSP00000233893	HSPE1
ENSP00000233944	PRKAG3
ENSP00000233946	IL1R1
ENSP00000233954	IL1RL1
ENSP00000233957	IL18R1
ENSP00000233969	SLC9A2
ENSP00000234038	PPP1R7
ENSP00000234040	PASK
ENSP00000234091	ID2
ENSP00000234142	GREB1
ENSP00000234179	PRKD3
ENSP00000234195	FAM82A1
ENSP00000234256	SLC1A4
ENSP00000234313	PLEK
ENSP00000234371	KISS1R
ENSP00000234392	VAX2
ENSP00000234396	ATP6V1B1
ENSP00000234420	MSH6
ENSP00000234453	PLEKHA3
ENSP00000234454	SPR
ENSP00000234488	CLCN6
ENSP00000234590	ENO1
ENSP00000234626	CDC7
ENSP00000234677	SARS
ENSP00000234701	CLCA1
ENSP00000234725	TMEM48
ENSP00000234739	BCL9
ENSP00000234800	SLC35E2B
ENSP00000234831	TMEM59
ENSP00000234961	OPRD1
ENSP00000235090	WDR77
ENSP00000235150	RNF19B
ENSP00000235310	MAD2L2
ENSP00000235329	MFN2
ENSP00000235372	PRDM2
ENSP00000235382	RGS2
ENSP00000235521	WARS2
ENSP00000235547	HSD3B1
ENSP00000235628	NT5C1A
ENSP00000235739	SLAMF1
ENSP00000235790	KDM5B
ENSP00000235932	RAB7L1
ENSP00000236017	APH1A
ENSP00000236067	ATP6V0B
ENSP00000236137	SLC19A2
ENSP00000236166	FMO6P
ENSP00000236192	VAMP4
ENSP00000236228	PTBP2
ENSP00000236412	PPP1R8
ENSP00000236495	SLC5A9
ENSP00000236709	A4GNT
ENSP00000236826	MMP8
ENSP00000236877	SLC8A2
ENSP00000236914	NR5A2
ENSP00000236925	CAMSAP2
ENSP00000236937	FCGR2B
ENSP00000236938	FCRLA
ENSP00000237014	TTR
ENSP00000237186	UBE3D
ENSP00000237201	SPACA1
ENSP00000237247	SGIP1
ENSP00000237264	TBPL1
ENSP00000237281	FBXO30
ENSP00000237283	ADAT2
ENSP00000237289	TNFAIP3
ENSP00000237305	SGK1
ENSP00000237353	PMFBP1
ENSP00000237449	DNAH6
ENSP00000237455	RNF103
ENSP00000237530	RPN2
ENSP00000237596	PKD2
ENSP00000237612	ABCG2
ENSP00000237653	ADH6
ENSP00000237696	RARRES1
ENSP00000237889	NDUFB3
ENSP00000237937	ZFAND5
ENSP00000238018	GDA
ENSP00000238081	YWHAQ
ENSP00000238146	DDX55
ENSP00000238248	PTGR1
ENSP00000238497	VPS4B
ENSP00000238508	SERPINB10
ENSP00000238561	ADCK1
ENSP00000238570	PCNX
ENSP00000238609	IFI27L2
ENSP00000238616	NEK9
ENSP00000238628	IFT43
ENSP00000238662	MLH3
ENSP00000238667	FLVCR2
ENSP00000238682	TGFB3
ENSP00000238688	SLIRP
ENSP00000238699	GPR68
ENSP00000238714	PAPOLG
ENSP00000238721	TP53I3
ENSP00000238788	TMEM214
ENSP00000238789	ATAD2B
ENSP00000238831	YIPF4
ENSP00000238855	AFTPH
ENSP00000238856	AFTPH
ENSP00000238892	CRIPT
ENSP00000238918	BAI3
ENSP00000238936	TMEM180
ENSP00000239027	HELLS
ENSP00000239032	PRLHR
ENSP00000239117	KCNIP2
ENSP00000239118	KCNIP2
ENSP00000239214	BNIP1
ENSP00000239215	BNIP1
ENSP00000239231	PANK3
ENSP00000239243	MSX2
ENSP00000239367	LRP11
ENSP00000239440	ARAP3
ENSP00000239444	PCDHB8
ENSP00000239446	PCDHB10
ENSP00000239449	PCDHB14
ENSP00000239450	PCDHB12
ENSP00000239451	SLC25A2
ENSP00000239457	DARS2
ENSP00000239468	TNFSF18
ENSP00000239587	TTLL2
ENSP00000239849	TNFSF11
ENSP00000239878	UFM1
ENSP00000239882	ELF1
ENSP00000239885	SMAD9
ENSP00000239891	ALG5
ENSP00000239938	EGR1
ENSP00000239940	PFN2
ENSP00000239944	SERP1
ENSP00000240093	FZD3
ENSP00000240095	SLC39A14
ENSP00000240123	SORBS3
ENSP00000240132	CHRNA2
ENSP00000240159	RNF170
ENSP00000240185	TARDBP
ENSP00000240285	RDH10
ENSP00000240333	SLC35B1
ENSP00000240343	DYNLL2
ENSP00000240361	TEX14
ENSP00000240423	NCAPH
ENSP00000240499	ZNF141
ENSP00000240587	TSHZ3
ENSP00000240615	TAS2R8
ENSP00000240618	KLRK1
ENSP00000240619	TAS2R10
ENSP00000240662	KCNJ8
ENSP00000240687	TAS2R7
ENSP00000240691	TAS2R9
ENSP00000240719	ZNF549
ENSP00000240727	ZSCAN18
ENSP00000240731	ZNF211
ENSP00000240851	TFG
ENSP00000240874	KALRN
ENSP00000240922	NAA50
ENSP00000241001	PAX6
ENSP00000241014	MAPK8IP1
ENSP00000241124	GJB6
ENSP00000241125	GJA3
ENSP00000241256	GHSR
ENSP00000241274	SLITRK3
ENSP00000241305	CPXM2
ENSP00000241312	CSMD2
ENSP00000241337	GSTM2
ENSP00000241356	ADORA3
ENSP00000241393	CXCR4
ENSP00000241416	ACVR2A
ENSP00000241453	FLT3
ENSP00000241704	COPA
ENSP00000241891	OPN4
ENSP00000242057	AHR
ENSP00000242059	SCRN1
ENSP00000242067	BBS9
ENSP00000242108	EEPD1
ENSP00000242140	WIPF3
ENSP00000242210	NT5C3
ENSP00000242249	RAMP3
ENSP00000242257	FTSJ2
ENSP00000242275	SLC25A51
ENSP00000242317	DNAI1
ENSP00000242351	ZC3HAV1
ENSP00000242365	KIAA1549
ENSP00000242462	NEUROG3
ENSP00000242480	EGR2
ENSP00000242577	DYNLL1
ENSP00000242607	HVCN1
ENSP00000242719	RNF11
ENSP00000242729	SSPN
ENSP00000242737	ITPR2
ENSP00000242770	STX10
ENSP00000242776	DDX39A
ENSP00000242783	PKN1
ENSP00000242786	CD97
ENSP00000242796	WDR83
ENSP00000242804	ZNF442
ENSP00000242810	KLHL24
ENSP00000242827	EBPL
ENSP00000242839	ATP7B
ENSP00000242848	ZC3H13
ENSP00000243040	PFDN5
ENSP00000243045	ORMDL2
ENSP00000243050	NR4A1
ENSP00000243052	PDE1B
ENSP00000243067	CDK2
ENSP00000243082	HOXC11
ENSP00000243167	FAAH
ENSP00000243186	RHCE
ENSP00000243213	IL13RA2
ENSP00000243218	MCM9
ENSP00000243298	RAB9B
ENSP00000243326	RIF1
ENSP00000243344	TTC21B
ENSP00000243346	NMI
ENSP00000243349	ACVR1C
ENSP00000243389	SLC36A1
ENSP00000243498	EXOSC9
ENSP00000243563	SNRPA
ENSP00000243583	ADCK4
ENSP00000243639	ZNF468
ENSP00000243643	ZNF415
ENSP00000243644	ZNF350
ENSP00000243662	RAB38
ENSP00000243673	GPR83
ENSP00000243776	CHPF
ENSP00000243810	SP140L
ENSP00000243896	SLC35C2
ENSP00000243903	ACTR5
ENSP00000243911	MC3R
ENSP00000243913	GCNT7
ENSP00000243914	CTCFL
ENSP00000243918	SYS1
ENSP00000243964	SLC12A5
ENSP00000244007	PLCG1
ENSP00000244020	SRSF6
ENSP00000244040	RAB22A
ENSP00000244043	PTGIS
ENSP00000244047	CDH26
ENSP00000244049	CDH26
ENSP00000244050	SNAI1
ENSP00000244051	MOCS3
ENSP00000244061	RNF114
ENSP00000244204	NAGK
ENSP00000244221	PAIP2B
ENSP00000244227	SNRNP27
ENSP00000244291	CEACAM1
ENSP00000244302	HIF3A
ENSP00000244303	HIF3A
ENSP00000244333	LYPD3
ENSP00000244360	RNF39
ENSP00000244364	DST
ENSP00000244458	PACSIN1
ENSP00000244519	BTN3A3
ENSP00000244520	SNRPC
ENSP00000244527	SLC17A1
ENSP00000244533	ABCC10
ENSP00000244546	PEX6
ENSP00000244565	UNC5CL
ENSP00000244571	AARS2
ENSP00000244576	ZNF391
ENSP00000244623	OR2B6
ENSP00000244625	TBCC
ENSP00000244645	TCP11
ENSP00000244669	APOBEC2
ENSP00000244709	TREM1
ENSP00000244711	MEA1
ENSP00000244728	COL21A1
ENSP00000244745	SOX4
ENSP00000244763	SSR1
ENSP00000244769	ATXN1
ENSP00000244776	DEK
ENSP00000244815	LRRFIP1
ENSP00000244891	TRIM51
ENSP00000245046	EMC3
ENSP00000245121	KATNAL2
ENSP00000245185	MT2A
ENSP00000245222	SPHK2
ENSP00000245255	PIWIL1
ENSP00000245312	SLC10A2
ENSP00000245407	SLC22A5
ENSP00000245414	IRF1
ENSP00000245418	UPF3B
ENSP00000245451	BMP4
ENSP00000245457	PTGER2
ENSP00000245458	RPS29
ENSP00000245503	MYH2
ENSP00000245551	MIF4GD
ENSP00000245552	NT5C
ENSP00000245564	MSTO1
ENSP00000245615	MBOAT7
ENSP00000245618	EPS8L1
ENSP00000245663	ZBTB46
ENSP00000245680	SLC35F5
ENSP00000245816	CLPP
ENSP00000245817	TNFSF9
ENSP00000245862	CD79B
ENSP00000245865	STRADA
ENSP00000245912	TNFSF14
ENSP00000245925	EML2
ENSP00000245932	VASP
ENSP00000245934	SYMPK
ENSP00000245960	CDC25B
ENSP00000246006	CD93
ENSP00000246012	CST8
ENSP00000246015	PSMF1
ENSP00000246024	TMX4
ENSP00000246032	STK35
ENSP00000246062	MKKS
ENSP00000246069	DSTN
ENSP00000246070	LAMP5
ENSP00000246071	SNRPB2
ENSP00000246090	BANF2
ENSP00000246104	SCRT2
ENSP00000246115	S1PR4
ENSP00000246117	NCLN
ENSP00000246139	CITED1
ENSP00000246163	MAX
ENSP00000246166	FNTB
ENSP00000246186	MMP24
ENSP00000246190	NECAB3
ENSP00000246194	RALY
ENSP00000246229	PLAGL2
ENSP00000246282	PHF7
ENSP00000246314	EIF2C3
ENSP00000246337	UROD
ENSP00000246421	SLC35E2
ENSP00000246529	LRFN3
ENSP00000246532	IGFLR1
ENSP00000246533	CAPNS1
ENSP00000246535	PDCD2L
ENSP00000246548	UBA2
ENSP00000246549	FFAR2
ENSP00000246551	HCST
ENSP00000246553	FFAR1
ENSP00000246657	CCR7
ENSP00000246672	NR1D1
ENSP00000246747	ARL2
ENSP00000246868	SBDS
ENSP00000246907	BRCA1
ENSP00000246912	MLX
ENSP00000246914	WNK4
ENSP00000246957	TRAP1
ENSP00000247001	SUGP1
ENSP00000247003	DDX49
ENSP00000247138	SLC35A2
ENSP00000247140	PQBP1
ENSP00000247170	DAAM1
ENSP00000247207	HSPA2
ENSP00000247219	TBPL2
ENSP00000247225	SGPP1
ENSP00000247270	EVI2A
ENSP00000247291	AIF1L
ENSP00000247461	CANX
ENSP00000247470	PYCARD
ENSP00000247584	HIVEP3
ENSP00000247655	COX7C
ENSP00000247668	TRAF2
ENSP00000247712	MPV17L2
ENSP00000247815	HELB
ENSP00000247829	TSPAN8
ENSP00000247879	TAS2R3
ENSP00000247881	TAS2R4
ENSP00000247883	TAS2R5
ENSP00000247930	ZNF777
ENSP00000247956	ZNF317
ENSP00000247970	PIN1
ENSP00000247977	FBXL12
ENSP00000247986	KIF17
ENSP00000248041	CYP4F11
ENSP00000248054	SIN3B
ENSP00000248058	OR7A10
ENSP00000248071	KLF2
ENSP00000248072	OR7C2
ENSP00000248073	OR7C1
ENSP00000248076	F2RL3
ENSP00000248089	HCFC1R1
ENSP00000248098	HN1L
ENSP00000248099	TSC2
ENSP00000248104	UNKL
ENSP00000248114	GFER
ENSP00000248211	ZNF10
ENSP00000248272	GAN
ENSP00000248378	EMC6
ENSP00000248384	OR1E2
ENSP00000248437	TUBA4A
ENSP00000248444	VIL1
ENSP00000248450	AAMP
ENSP00000248451	PNKD
ENSP00000248484	TNFRSF19
ENSP00000248553	HSPB1
ENSP00000248594	PTPN12
ENSP00000248633	PEX1
ENSP00000248668	LRFN1
ENSP00000248673	ZFP36
ENSP00000248706	RASL11B
ENSP00000248923	GGT1
ENSP00000248929	SGSM3
ENSP00000248933	SEZ6L
ENSP00000248975	YWHAH
ENSP00000248980	RFPL2
ENSP00000248983	RFPL2
ENSP00000248984	C22orf24
ENSP00000249007	RFPL3
ENSP00000249014	CDC42EP1
ENSP00000249016	MCHR1
ENSP00000249041	GALR3
ENSP00000249044	APOL5
ENSP00000249071	RAC2
ENSP00000249116	APOBEC3A
ENSP00000249209	EMC4
ENSP00000249269	PMPCB
ENSP00000249270	DNAJC2
ENSP00000249284	TAS2R16
ENSP00000249344	FAM40B
ENSP00000249356	DNAJB9
ENSP00000249363	LRRC4
ENSP00000249373	SMO
ENSP00000249389	OPN1SW
ENSP00000249396	SIRT2
ENSP00000249636	PIAS1
ENSP00000249700	TMOD2
ENSP00000249714	SERINC4
ENSP00000249736	SLTM
ENSP00000249749	DLL4
ENSP00000249750	ALDH1A2
ENSP00000249776	C15orf23
ENSP00000249806	CLN6
ENSP00000249822	ARPP19
ENSP00000249861	THAP10
ENSP00000249887	CCRL1
ENSP00000249910	MBD4
ENSP00000249923	COPB1
ENSP00000250003	MYOD1
ENSP00000250066	USP6
ENSP00000250076	ZNF232
ENSP00000250087	AIPL1
ENSP00000250092	CD68
ENSP00000250111	ATP1B2
ENSP00000250113	FXR2
ENSP00000250124	MPDU1
ENSP00000250144	MMP28
ENSP00000250173	LRRC6
ENSP00000250237	QTRT1
ENSP00000250263	ERI1
ENSP00000250373	NFATC4
ENSP00000250379	GEMIN2
ENSP00000250383	DHRS2
ENSP00000250454	EAPP
ENSP00000250457	EGLN3
ENSP00000250489	TMEM55B
ENSP00000250498	DAD1
ENSP00000250572	EMR1
ENSP00000250615	AANAT
ENSP00000250617	ARHGEF6
ENSP00000250699	CHRNA10
ENSP00000250831	RBMY1J
ENSP00000250863	DAZL
ENSP00000250894	MAPK8IP3
ENSP00000250896	MKNK2
ENSP00000250916	KLF16
ENSP00000251020	SALL1
ENSP00000251030	KIAA0564
ENSP00000251038	ZC3H14
ENSP00000251041	MYO16
ENSP00000251047	LMAN1
ENSP00000251071	CAPRIN2
ENSP00000251081	DSC2
ENSP00000251091	SAMD4A
ENSP00000251108	CDADC1
ENSP00000251127	NALCN
ENSP00000251143	C16orf62
ENSP00000251170	SEC14L5
ENSP00000251241	DHX40
ENSP00000251268	MEGF8
ENSP00000251269	ZNF221
ENSP00000251334	INTS2
ENSP00000251363	CERS4
ENSP00000251372	LILRA1
ENSP00000251376	LILRA2
ENSP00000251377	LILRA2
ENSP00000251413	TUBG1
ENSP00000251472	MAST1
ENSP00000251473	AC024575.1
ENSP00000251481	SULT1C2
ENSP00000251496	NCAPG
ENSP00000251527	ESYT2
ENSP00000251566	UGT2A3
ENSP00000251582	ADAMTS2
ENSP00000251607	TRNT1
ENSP00000251636	DHX29
ENSP00000251642	DHX58
ENSP00000251654	PCCB
ENSP00000251691	KIAA1244
ENSP00000251757	PHC1
ENSP00000251758	DDX11
ENSP00000251768	SLC4A5
ENSP00000251772	PLXNA1
ENSP00000251775	SNX4
ENSP00000251776	ROPN1B
ENSP00000251808	GRHL2
ENSP00000251809	SPAG1
ENSP00000251810	RRM2B
ENSP00000251849	RAF1
ENSP00000251864	TDRD1
ENSP00000251879	KIAA1432
ENSP00000251968	TSG101
ENSP00000251973	CARD10
ENSP00000252011	DHX35
ENSP00000252050	CUL9
ENSP00000252071	ACTR3C
ENSP00000252085	PCDHGA12
ENSP00000252087	PCDHGC5
ENSP00000252100	TMCO6
ENSP00000252108	UBE4A
ENSP00000252115	POLDIP3
ENSP00000252116	POLDIP3
ENSP00000252136	TRMT2A
ENSP00000252172	MYH13
ENSP00000252207	ZNF193
ENSP00000252211	ZKSCAN3
ENSP00000252242	KRT5
ENSP00000252268	DPF2
ENSP00000252318	GALNT8
ENSP00000252322	EFCAB4B
ENSP00000252338	FAM155B
ENSP00000252440	ECSIT
ENSP00000252457	CDC16
ENSP00000252463	ZSCAN10
ENSP00000252483	PVRL2
ENSP00000252485	PVRL2
ENSP00000252486	APOE
ENSP00000252512	XPO7
ENSP00000252519	ACE2
ENSP00000252542	SAFB2
ENSP00000252576	NDUFA13
ENSP00000252577	GATAD2A
ENSP00000252590	PLVAP
ENSP00000252595	SLC27A1
ENSP00000252631	SNX9
ENSP00000252660	MAS1
ENSP00000252669	ACSBG2
ENSP00000252674	MLLT1
ENSP00000252675	FUT5
ENSP00000252688	KIF25
ENSP00000252692	MLLT4
ENSP00000252699	ACTN4
ENSP00000252711	NDUFA10
ENSP00000252713	ZNF655
ENSP00000252725	ARPC1B
ENSP00000252744	ZSWIM6
ENSP00000252797	ZNF764
ENSP00000252799	ZNF747
ENSP00000252826	TRPM4
ENSP00000252835	OR11H1
ENSP00000252840	ZNF557
ENSP00000252891	NUMBL
ENSP00000252934	ATXN10
ENSP00000252939	CALY
ENSP00000252979	ZNF337
ENSP00000252984	ALKBH6
ENSP00000252996	TAF4
ENSP00000252997	GATA5
ENSP00000253003	ADRM1
ENSP00000253004	ASS1
ENSP00000253008	PRDM12
ENSP00000253023	UBE2M
ENSP00000253024	TRIM28
ENSP00000253031	YIPF2
ENSP00000253047	TMEM160
ENSP00000253048	ZC3H4
ENSP00000253055	MAP3K10
ENSP00000253063	SESN2
ENSP00000253079	CCDC62
ENSP00000253107	PPAN
ENSP00000253108	EIF3G
ENSP00000253115	ZNF426
ENSP00000253122	SLC6A8
ENSP00000253144	ZNF331
ENSP00000253159	ZNF236
ENSP00000253193	LRP3
ENSP00000253237	GRWD1
ENSP00000253251	UBE4B
ENSP00000253255	PKDREJ
ENSP00000253270	SLC35D2
ENSP00000253303	RGN
ENSP00000253329	PPIL4
ENSP00000253332	AKAP12
ENSP00000253339	LATS1
ENSP00000253363	RBM39
ENSP00000253382	ACSS2
ENSP00000253392	EDA2R
ENSP00000253407	C1QL1
ENSP00000253408	GFAP
ENSP00000253410	HIGD1B
ENSP00000253413	ATP6V1E1
ENSP00000253426	ZNF285
ENSP00000253457	EMC8
ENSP00000253506	NFATC1
ENSP00000253571	RLIM
ENSP00000253577	ABCB7
ENSP00000253673	EMR3
ENSP00000253680	HSH2D
ENSP00000253686	MRPS25
ENSP00000253688	SH3BP5
ENSP00000253697	C3orf20
ENSP00000253699	ZFYVE20
ENSP00000253727	NR1H2
ENSP00000253754	PDLIM4
ENSP00000253778	GFPT2
ENSP00000253792	ACLY
ENSP00000253796	RAMP2
ENSP00000253799	AOC2
ENSP00000253801	G6PC
ENSP00000253812	PCDHGA3
ENSP00000253814	NDFIP1
ENSP00000253815	UBE2D2
ENSP00000253856	ATP6V0A4
ENSP00000253861	EXOC4
ENSP00000253925	PPFIA1
ENSP00000253928	FLYWCH1
ENSP00000253934	TMEM204
ENSP00000254035	CKMT2
ENSP00000254037	ZCCHC9
ENSP00000254051	TNS4
ENSP00000254066	RARA
ENSP00000254079	PPP1R1B
ENSP00000254090	FMO5
ENSP00000254101	PRKAB2
ENSP00000254108	FUS
ENSP00000254122	FSHB
ENSP00000254165	ZSCAN5A
ENSP00000254166	ZNF132
ENSP00000254182	ZNF211
ENSP00000254190	CHSY1
ENSP00000254227	NR0B2
ENSP00000254231	LIN28A
ENSP00000254235	ADCY7
ENSP00000254250	THAP1
ENSP00000254286	ACTR10
ENSP00000254301	LGALS3
ENSP00000254321	ZNF700
ENSP00000254322	DNAJB1
ENSP00000254323	ZSWIM4
ENSP00000254351	SDC1
ENSP00000254436	TRIM21
ENSP00000254457	LHX1
ENSP00000254466	GAS2L2
ENSP00000254488	SLC6A11
ENSP00000254521	HSD17B7
ENSP00000254584	ARFIP2
ENSP00000254605	RRP8
ENSP00000254653	IQCA1
ENSP00000254654	ILKAP
ENSP00000254657	PER2
ENSP00000254658	PER2
ENSP00000254661	RAMP1
ENSP00000254667	PTPRE
ENSP00000254675	RAN
ENSP00000254712	INPP5K
ENSP00000254718	MYBBP1A
ENSP00000254719	RPA1
ENSP00000254730	EEFSEC
ENSP00000254742	TMEM128
ENSP00000254759	COQ3
ENSP00000254765	POPDC3
ENSP00000254770	LANCL2
ENSP00000254799	GRSF1
ENSP00000254816	TRIM47
ENSP00000254821	ZRANB2
ENSP00000254850	ASGR2
ENSP00000254854	GUCY2D
ENSP00000254868	CLEC10A
ENSP00000254878	HRSP12
ENSP00000254901	REEP2
ENSP00000254928	ERAL1
ENSP00000254942	TERF2
ENSP00000254950	VPS4A
ENSP00000254958	JAG1
ENSP00000254960	RBCK1
ENSP00000254963	HSPA12B
ENSP00000254976	SNAP25
ENSP00000254998	NXT1
ENSP00000255006	RIN2
ENSP00000255008	SSTR4
ENSP00000255078	IGHMBP2
ENSP00000255082	ACY3
ENSP00000255087	MTL5
ENSP00000255108	DPH2
ENSP00000255120	NASP
ENSP00000255121	NASP
ENSP00000255129	ZNF334
ENSP00000255136	PABPC1L
ENSP00000255152	ZSWIM3
ENSP00000255175	SERINC3
ENSP00000255189	DMGDH
ENSP00000255192	BHMT2
ENSP00000255224	SYT4
ENSP00000255226	SLC14A2
ENSP00000255262	NMUR2
ENSP00000255283	ATP8A2
ENSP00000255305	XPO4
ENSP00000255310	TPTE2
ENSP00000255324	RNF17
ENSP00000255325	RNF17
ENSP00000255326	RNF17
ENSP00000255380	CHRM3
ENSP00000255381	MYH4
ENSP00000255389	PEMT
ENSP00000255409	CHI3L1
ENSP00000255432	LGR6
ENSP00000255448	DCLK1
ENSP00000255495	MORC4
ENSP00000255499	RNF128
ENSP00000255531	PCDH19
ENSP00000255559	SLC39A11
ENSP00000255616	ZNF414
ENSP00000255641	CSNK1G2
ENSP00000255695	HRASLS2
ENSP00000255746	ZNF679
ENSP00000255830	SLC2A11
ENSP00000255858	SEC14L4
ENSP00000255882	PI4KA
ENSP00000255977	MKRN1
ENSP00000256001	ACTR3B
ENSP00000256015	BTG1
ENSP00000256031	ATP13A3
ENSP00000256062	TMTC1
ENSP00000256079	IPO8
ENSP00000256084	SPINK5
ENSP00000256103	PMP2
ENSP00000256104	FABP4
ENSP00000256108	IMPA1
ENSP00000256119	CA1
ENSP00000256186	MICALCL
ENSP00000256194	MICAL2
ENSP00000256255	TMEM66
ENSP00000256257	RNF122
ENSP00000256319	C14orf1
ENSP00000256339	UNC79
ENSP00000256383	EIF2S1
ENSP00000256389	ADAM20
ENSP00000256398	ELP3
ENSP00000256412	ADAMDEC1
ENSP00000256413	CTIF
ENSP00000256429	MBD2
ENSP00000256433	IER3IP1
ENSP00000256442	CCNB1
ENSP00000256443	CDK7
ENSP00000256447	CD180
ENSP00000256452	IL5RA
ENSP00000256458	IRAK2
ENSP00000256460	CAMK1
ENSP00000256496	ARL8B
ENSP00000256509	CHL1
ENSP00000256545	EMC7
ENSP00000256552	TRPM1
ENSP00000256594	GSTM3
ENSP00000256637	SORT1
ENSP00000256644	HBXIP
ENSP00000256646	NOTCH2
ENSP00000256649	TRIM45
ENSP00000256652	CD101
ENSP00000256680	FKBP11
ENSP00000256682	ARF3
ENSP00000256686	TMEM106C
ENSP00000256689	SLC38A2
ENSP00000256707	KIDINS220
ENSP00000256720	LPIN1
ENSP00000256722	CMPK2
ENSP00000256737	ANO3
ENSP00000256759	FST
ENSP00000256797	ERN2
ENSP00000256830	NEDD4L
ENSP00000256854	NARS
ENSP00000256897	CCNH
ENSP00000256906	HRH4
ENSP00000256935	DOCK2
ENSP00000256951	EMP1
ENSP00000256953	RERG
ENSP00000256958	SLCO1B1
ENSP00000256997	ACP2
ENSP00000256999	FOLH1
ENSP00000257017	RAB33A
ENSP00000257068	MTNR1B
ENSP00000257070	BAI2
ENSP00000257100	SPOCD1
ENSP00000257118	PHC2
ENSP00000257177	ZCCHC11
ENSP00000257189	DSG3
ENSP00000257190	RNF138
ENSP00000257191	ELP2
ENSP00000257192	DSG1
ENSP00000257197	DSC1
ENSP00000257198	DSC1
ENSP00000257209	FHOD3
ENSP00000257215	DAGLA
ENSP00000257245	TIMM10
ENSP00000257247	AHNAK
ENSP00000257254	APLNR
ENSP00000257262	C11orf10
ENSP00000257267	GPR77
ENSP00000257290	PDGFRA
ENSP00000257312	DZIP1
ENSP00000257336	BIVM
ENSP00000257347	CARS2
ENSP00000257359	ADAMTS8
ENSP00000257408	KLB
ENSP00000257414	SEMA6A
ENSP00000257430	APC
ENSP00000257435	NREP
ENSP00000257468	UBQLN1
ENSP00000257497	ANXA1
ENSP00000257515	FAM189A2
ENSP00000257527	ADAM19
ENSP00000257548	USP30
ENSP00000257549	SDS
ENSP00000257552	MSI1
ENSP00000257555	HNF1A
ENSP00000257570	OASL
ENSP00000257572	HRK
ENSP00000257575	RNFT2
ENSP00000257600	DTX1
ENSP00000257604	TRAFD1
ENSP00000257632	UPK3B
ENSP00000257637	C7orf23
ENSP00000257659	GTPBP10
ENSP00000257663	TMEM60
ENSP00000257694	PNPLA8
ENSP00000257696	HILPDA
ENSP00000257700	RINT1
ENSP00000257724	MDFIC
ENSP00000257745	MLL5
ENSP00000257765	KHDC1
ENSP00000257766	KIAA1009
ENSP00000257769	SNX14
ENSP00000257770	NT5E
ENSP00000257818	LMO2
ENSP00000257821	PHF21A
ENSP00000257829	NAT10
ENSP00000257832	ELF5
ENSP00000257836	PRRG4
ENSP00000257857	CD63
ENSP00000257861	AVIL
ENSP00000257863	AMHR2
ENSP00000257897	AGAP2
ENSP00000257904	CDK4
ENSP00000257909	TROAP
ENSP00000257910	TSPAN31
ENSP00000257931	PAN2
ENSP00000257940	ZC3H10
ENSP00000257963	ACVR1B
ENSP00000257979	MIP
ENSP00000257981	KCNH3
ENSP00000258034	TAAR5
ENSP00000258042	NMBR
ENSP00000258091	CCT7
ENSP00000258104	DYSF
ENSP00000258148	MDM2
ENSP00000258149	MDM2
ENSP00000258169	MPHOSPH6
ENSP00000258173	TMEM231
ENSP00000258180	KIAA0513
ENSP00000258187	NDRG4
ENSP00000258198	DYNC1LI2
ENSP00000258201	FHOD1
ENSP00000258229	PCNXL2
ENSP00000258301	STX6
ENSP00000258302	RGS8
ENSP00000258317	NPL
ENSP00000258324	PIGC
ENSP00000258349	RC3H1
ENSP00000258362	PNKD
ENSP00000258381	SP110
ENSP00000258382	SP110
ENSP00000258385	CHRND
ENSP00000258398	TTLL4
ENSP00000258400	HTR2B
ENSP00000258403	SLC19A3
ENSP00000258412	TMBIM1
ENSP00000258416	EIF4E2
ENSP00000258436	MFSD9
ENSP00000258439	TMEM127
ENSP00000258443	EDAR
ENSP00000258449	TGFBRAP1
ENSP00000258456	GPR45
ENSP00000258494	ALDH1L2
ENSP00000258499	USP44
ENSP00000258526	PLXNC1
ENSP00000258530	APPL2
ENSP00000258534	DRAM1
ENSP00000258538	SLC41A2
ENSP00000258607	CKAP2
ENSP00000258613	THSD1
ENSP00000258646	RCBTB1
ENSP00000258654	COG3
ENSP00000258672	SETDB2
ENSP00000258679	PLEKHA8
ENSP00000258682	CAMK2B
ENSP00000258711	CHST12
ENSP00000258729	IGF2BP3
ENSP00000258733	GPNMB
ENSP00000258738	ABCB5
ENSP00000258739	KDELR2
ENSP00000258742	NUPL2
ENSP00000258772	DDX56
ENSP00000258781	CCM2
ENSP00000258787	MYO1G
ENSP00000258821	TTC5
ENSP00000258840	RALGAPA1
ENSP00000258873	ACSBG1
ENSP00000258874	MTHFS
ENSP00000258886	IREB2
ENSP00000258888	ALPK3
ENSP00000258947	CALCOCO2
ENSP00000258955	RSAD1
ENSP00000258960	NMT1
ENSP00000258962	SRSF1
ENSP00000258963	VEZF1
ENSP00000258991	TEX2
ENSP00000259006	LIMD2
ENSP00000259008	BRIP1
ENSP00000259021	KAT7
ENSP00000259030	RTP4
ENSP00000259037	NDUFB5
ENSP00000259043	TRA2B
ENSP00000259050	2014-03-07
ENSP00000259053	CD302
ENSP00000259056	GALNT5
ENSP00000259089	BLK
ENSP00000259119	SKIL
ENSP00000259199	CBWD2
ENSP00000259206	IL1RN
ENSP00000259237	BIN1
ENSP00000259238	BIN1
ENSP00000259241	HS6ST1
ENSP00000259324	LRRC8A
ENSP00000259339	TOR1B
ENSP00000259351	RALGPS1
ENSP00000259357	OR1J1
ENSP00000259362	OR13C9
ENSP00000259365	TMOD1
ENSP00000259392	SLC31A2
ENSP00000259395	ZNF189
ENSP00000259400	STX17
ENSP00000259406	RGS3
ENSP00000259410	KIF12
ENSP00000259455	GABBR2
ENSP00000259466	OR1L4
ENSP00000259469	RPL35
ENSP00000259470	CTSL2
ENSP00000259477	ARPC5L
ENSP00000259486	ENPP2
ENSP00000259512	DERL1
ENSP00000259569	RANBP6
ENSP00000259605	RNF38
ENSP00000259699	HFE
ENSP00000259708	KLC4
ENSP00000259711	KIF13A
ENSP00000259737	YIPF3
ENSP00000259746	TMEM63B
ENSP00000259750	TTBK1
ENSP00000259803	GCM1
ENSP00000259808	RIPK1
ENSP00000259818	TUBB2B
ENSP00000259874	IER3
ENSP00000259875	DDR1
ENSP00000259883	PGBD1
ENSP00000259891	MOG
ENSP00000259895	GTF2H4
ENSP00000259915	POU5F1
ENSP00000259930	TRIM15
ENSP00000259939	RNF144B
ENSP00000259941	TRIM10
ENSP00000259953	NRM
ENSP00000259963	FAM8A1
ENSP00000259997	CPEB2
ENSP00000260010	TLR2
ENSP00000260045	PRKRIR
ENSP00000260051	NUMA1
ENSP00000260054	CCDC90B
ENSP00000260056	RAB30
ENSP00000260126	SLCO5A1
ENSP00000260129	TGS1
ENSP00000260130	SDCBP
ENSP00000260184	DDX60L
ENSP00000260187	USP2
ENSP00000260191	HTR3B
ENSP00000260197	SORL1
ENSP00000260227	MMP7
ENSP00000260228	MMP20
ENSP00000260229	MMP27
ENSP00000260257	FDXACB1
ENSP00000260264	POU2F3
ENSP00000260282	FXYD6
ENSP00000260302	MMP13
ENSP00000260318	ALKBH8
ENSP00000260323	UNC13C
ENSP00000260324	SQRDL
ENSP00000260359	NUSAP1
ENSP00000260361	NDUFAF1
ENSP00000260363	KIF23
ENSP00000260372	HAUS2
ENSP00000260382	LRRC49
ENSP00000260385	FAM82A2
ENSP00000260386	ITPKA
ENSP00000260403	TMEM62
ENSP00000260404	PAK6
ENSP00000260408	ADAM10
ENSP00000260442	BCL2L10
ENSP00000260447	GCHFR
ENSP00000260585	EPT1
ENSP00000260598	KHK
ENSP00000260599	KHK
ENSP00000260600	ADCY3
ENSP00000260637	SULT6B1
ENSP00000260641	ACTR2
ENSP00000260643	PREB
ENSP00000260645	ABCG5
ENSP00000260665	LRPPRC
ENSP00000260731	KIF11
ENSP00000260733	TACC2
ENSP00000260743	CALHM2
ENSP00000260746	ARL3
ENSP00000260753	KIF20B
ENSP00000260766	PLCE1
ENSP00000260795	FGFR3
ENSP00000260843	GPR87
ENSP00000260926	SATB2
ENSP00000260943	ERBB4
ENSP00000260947	BARD1
ENSP00000260950	MSTN
ENSP00000260953	METTL5
ENSP00000260956	SSB
ENSP00000260967	CDK15
ENSP00000260970	PPIG
ENSP00000260983	HECW2
ENSP00000260985	IDH1
ENSP00000260988	CRYGB
ENSP00000261008	CHRNA1
ENSP00000261016	ABI2
ENSP00000261017	ABI2
ENSP00000261024	SLC40A1
ENSP00000261034	SLC35A5
ENSP00000261038	DIRC2
ENSP00000261070	COX17
ENSP00000261167	WBP11
ENSP00000261169	LMO3
ENSP00000261170	GUCY2C
ENSP00000261173	ATP2B1
ENSP00000261177	TSPAN11
ENSP00000261178	ARNTL2
ENSP00000261180	TRHDE
ENSP00000261187	SLC16A7
ENSP00000261191	ASUN
ENSP00000261195	GYS2
ENSP00000261196	SLCO1B3
ENSP00000261200	ABCC9
ENSP00000261201	ABCC9
ENSP00000261202	ABCC9
ENSP00000261205	SYT1
ENSP00000261206	ACSS3
ENSP00000261208	HAL
ENSP00000261210	TMPO
ENSP00000261211	CDK17
ENSP00000261226	TMCC3
ENSP00000261233	IRAK3
ENSP00000261234	TMEM5
ENSP00000261245	MNAT1
ENSP00000261247	JKAMP
ENSP00000261263	RAB21
ENSP00000261275	FAM189A1
ENSP00000261276	OCA2
ENSP00000261303	PSMC1
ENSP00000261313	PEBP1
ENSP00000261332	ZNF24
ENSP00000261333	ZNF397
ENSP00000261349	LRP6
ENSP00000261367	SNCAIP
ENSP00000261368	SNCAIP
ENSP00000261374	HS3ST2
ENSP00000261377	AC004381.6
ENSP00000261378	AC004381.6
ENSP00000261381	XYLT1
ENSP00000261383	DNAH3
ENSP00000261386	GDE1
ENSP00000261388	TMEM159
ENSP00000261400	WSCD2
ENSP00000261402	NUAK1
ENSP00000261407	LPCAT3
ENSP00000261424	RFC1
ENSP00000261427	UBE2K
ENSP00000261435	N4BP2
ENSP00000261438	KLF3
ENSP00000261443	CSDE1
ENSP00000261454	PROX1
ENSP00000261455	TMEM206
ENSP00000261458	HHAT
ENSP00000261461	PPP2R5A
ENSP00000261464	TRAF5
ENSP00000261465	HSD11B1
ENSP00000261479	PSMA6
ENSP00000261483	MAN2A1
ENSP00000261486	EPB41L4A
ENSP00000261488	ENOX1
ENSP00000261489	TSC22D1
ENSP00000261491	DGKH
ENSP00000261497	USP22
ENSP00000261507	MSMO1
ENSP00000261514	CLCN3
ENSP00000261523	RORA
ENSP00000261532	ESRRB
ENSP00000261534	POMT2
ENSP00000261535	ROCK2
ENSP00000261537	MIB1
ENSP00000261556	C14orf101
ENSP00000261560	ZNF430
ENSP00000261569	MAST4
ENSP00000261574	IPO5
ENSP00000261590	DSG2
ENSP00000261593	RNF138
ENSP00000261598	SMCHD1
ENSP00000261600	THOC1
ENSP00000261601	USP14
ENSP00000261609	HERC2
ENSP00000261615	DPEP1
ENSP00000261622	SLC7A5
ENSP00000261636	ARL1
ENSP00000261637	UTP20
[truncated: 34,275 more rows]
