# Supplementary material for: Identification of Influenza A/H7N9 Virus Infection-Related Human Genes Based on Shortest Paths in a Virus-Human Protein Interaction Network
Source: Biomed Res Int. 2014 May 18;2014:239462. doi: 10.1155/2014/239462 (PMC4052153; doi:10.1155/2014/239462)
Supplement: Supplementary file 1 — Supporting Information S1: Sequences of the 11 non-homologous influenza A/H7N9 virus proteins downloaded from NCBI protein database, with pairwise sequence identity less than 40%. Supporting Information S2: The interacting influenza A/H7N9 virus-human protein pairs with their sharing GO terms. The interacting HRV-human and RSV-human protein pairs were also included respectively. Supporting Information S3: The 3,212 Target Human Proteins interacted with influenza A/H7N9 virus proteins, found based on sharing GO terms. The Target Human Proteins interacted with HRV and RSV viruses were also included respectively. Supporting Information S4: The 962 shortest path human proteins picked out on shortest paths for influenza A/H7N9 virus. The shortest path human proteins for HRV and RSV viruses were also included respectively. Supporting Information S5: Sequences of the 4 non-homologous Human Rhinovirus (HRV) proteins downloaded from NCBI protein database, with pairwise sequence identity less than 40%. Supporting Information S6: Sequences of the 22 non-homologous Respiratory Syncytical Virus (RSV) proteins downloaded from NCBI protein database, with pairwise sequence identity less than 40%. [file 239462.f1.zip › Supporting Information/Supporting Information S4.xls]

## Sheet: H7N9 shortest path proteins
H7N9 Shortest path human proteins
Ensembl Protein ID	Gene	Betweenness
ENSP00000361626	YBX1	58376
ENSP00000363676	RPL11	49155
ENSP00000396127	RAN	49036
ENSP00000362413	PGK1	26743
ENSP00000229239	GAPDH	25345
ENSP00000294172	NXF1	23550
ENSP00000352400	NUP214	21849
ENSP00000280892	EIF4E	20883
ENSP00000379933	TPI1	19217
ENSP00000348877	GPI	18885
ENSP00000317904	GYS1	18349
ENSP00000350283	BRCA1	16827
ENSP00000283195	RANBP2	16823
ENSP00000400591	SNRPE	15796
ENSP00000265686	TCIRG1	14465
ENSP00000358563	DKC1	13535
ENSP00000234396	ATP6V1B1	13432
ENSP00000218516	GLA	12471
ENSP00000262030	ATP5B	11891
ENSP00000260947	BARD1	11297
ENSP00000359345	RPL5	9995
ENSP00000305503	NUP62	9524
ENSP00000220592	EIF2C2	9503
ENSP00000348708	UPF2	9463
ENSP00000217109	CSTF1	9414
ENSP00000262077	NUP153	9165
ENSP00000315791	CSTF3	8486
ENSP00000349467	CALM1	8358
ENSP00000310596	LSM1	8350
ENSP00000398597	EXOSC6	7995
ENSP00000252816	LSM4	7925
ENSP00000331817	ALYREF	7874
ENSP00000311430	RPL4	7692
ENSP00000314949	POLR2A	7596
ENSP00000410833	GBE1	7565
ENSP00000278572	RPS3	7220
ENSP00000360286	RAE1	7179
ENSP00000315859	RNPS1	7176
ENSP00000377192	G6PD	6914
ENSP00000333001	RBM8A	6682
ENSP00000352842	PFKM	6652
ENSP00000358737	ATP5F1	6508
ENSP00000309572	TERT	6454
ENSP00000261396	NUP133	6423
ENSP00000338703	UGP2	6234
ENSP00000313829	KHDRBS1	5898
ENSP00000327070	MDH2	5742
ENSP00000368119	GALT	5695
ENSP00000306920	GLB1	5475
ENSP00000290299	ATP5O	4957
ENSP00000366135	EXOSC10	4885
ENSP00000270776	PGD	4826
ENSP00000343745	DICER1	4790
ENSP00000264951	XRN1	4481
ENSP00000229179	NUP107	4367
ENSP00000362063	CSTF2	4182
ENSP00000316879	EIF4G1	3912
ENSP00000273398	ATP6V1A	3896
ENSP00000256383	EIF2S1	3878
ENSP00000311028	RPS14	3834
ENSP00000285930	AKR1B1	3768
ENSP00000351602	FUT4	3761
ENSP00000257408	KLB	3689
ENSP00000346694	HNRNPA2B1	3616
ENSP00000307863	U2AF2	3586
ENSP00000321584	IMPDH2	3584
ENSP00000302160	LSM3	3561
ENSP00000326261	SRRM1	3434
ENSP00000316032	NUP98	3368
ENSP00000234590	ENO1	3323
ENSP00000354739	RPL12	3291
ENSP00000346015	RPL27A	3176
ENSP00000221448	SNRNP70	3115
ENSP00000342056	CS	2927
ENSP00000249289	ATP6V1F	2925
ENSP00000264867	PPARGC1A	2910
ENSP00000238112	CPSF3	2902
ENSP00000360532	CDC5L	2876
ENSP00000349428	PTBP1	2874
ENSP00000368226	GK	2869
ENSP00000365439	HNRNPK	2857
ENSP00000296930	NPM1	2836
ENSP00000320171	PKM	2819
ENSP00000341562	B4GALNT1	2817
ENSP00000359506	FMR1	2762
ENSP00000331664	MGAT4C	2761
ENSP00000373715	DCP2	2646
ENSP00000346022	RPL9	2556
ENSP00000304350	PRPF8	2363
ENSP00000303830	INSR	2289
ENSP00000196551	RPS5	2281
ENSP00000251453	RPS16	2254
ENSP00000375863	HNRNPUL1	2095
ENSP00000262238	YY1	2087
ENSP00000229304	APOBEC1	1945
ENSP00000221419	HNRNPL	1930
ENSP00000352401	RPE	1924
ENSP00000370119	SMN2	1924
ENSP00000314792	BOLL	1922
ENSP00000226578	MANBA	1919
ENSP00000297373	PHKG1	1917
ENSP00000369274	PHKA2	1916
ENSP00000310668	NUP93	1915
ENSP00000295959	RPP14	1914
ENSP00000366843	ATXN2	1912
ENSP00000245838	THOC2	1910
ENSP00000302768	PAIP1	1904
ENSP00000294724	AGL	1902
ENSP00000338173	PUM2	1902
ENSP00000253413	ATP6V1E1	1902
ENSP00000312021	FUT1	1901
ENSP00000354125	EIF3B	1899
ENSP00000250784	RPS4Y1	1897
ENSP00000264162	LCT	1895
ENSP00000266079	PRPF6	1853
ENSP00000301587	ATP5H	1797
ENSP00000339933	PKLR	1775
ENSP00000300291	NUDT21	1740
ENSP00000360525	MAGOH	1688
ENSP00000233114	MDH1	1648
ENSP00000254998	NXT1	1605
ENSP00000300413	SNRPD1	1596
ENSP00000339027	RPLP0	1477
ENSP00000262803	UPF1	1428
ENSP00000285393	ATP6V0D2	1341
ENSP00000225614	GALK1	1220
ENSP00000009589	RPS20	1204
ENSP00000254108	FUS	1186
ENSP00000352516	DNMT1	1166
ENSP00000262584	RPL8	1122
ENSP00000361110	GBGT1	1119
ENSP00000268097	HEXA	1080
ENSP00000364289	NCBP1	1059
ENSP00000320935	SLC2A4	1038
ENSP00000314508	GBA	995
ENSP00000364486	FBP2	987
ENSP00000324105	ENO3	968
ENSP00000329968	PHKG2	967
ENSP00000360125	PGM1	966
ENSP00000362463	GLO1	964
ENSP00000370589	NOP56	964
ENSP00000354673	CNOT4	962
ENSP00000359539	GOT1	961
ENSP00000221486	RNASEH2A	961
ENSP00000231498	NUP155	960
ENSP00000267884	SRP14	960
ENSP00000359958	ZRANB2	960
ENSP00000349748	SFPQ	960
ENSP00000223366	GCK	960
ENSP00000254436	TRIM21	960
ENSP00000364119	EIF2S2	960
ENSP00000348578	G3BP1	960
ENSP00000301149	GPD1	960
ENSP00000258962	SRSF1	960
ENSP00000374467	ABCC8	960
ENSP00000341826	HNRNPA1	960
ENSP00000370083	SMN1	960
ENSP00000338371	TNRC6B	960
ENSP00000336702	EIF5A	960
ENSP00000282641	A1CF	960
ENSP00000228284	SART3	959
ENSP00000353741	ETF1	959
ENSP00000243563	SNRPA	959
ENSP00000362900	SRSF4	959
ENSP00000377640	RPL24	959
ENSP00000307875	B3GAT1	959
ENSP00000368927	EIF1AX	959
ENSP00000262056	EIF4B	959
ENSP00000299518	IDH3A	959
ENSP00000319690	HNRNPC	959
ENSP00000346120	DDX21	958
ENSP00000305556	PCBP1	958
ENSP00000362057	NOX1	958
ENSP00000283179	HNRNPU	957
ENSP00000393953	PNPT1	956
ENSP00000326981	IMP3	955
ENSP00000245551	MIF4GD	955
ENSP00000401177	NOL8	955
ENSP00000350352	TRMT1	954
ENSP00000321259	TALDO1	953
ENSP00000309117	RBFOX1	953
ENSP00000216780	PCK2	952
ENSP00000414187	CPEB1	952
ENSP00000261733	ALDH2	951
ENSP00000362820	SRSF3	951
ENSP00000301740	SRRM2	950
ENSP00000385269	ELAVL1	948
ENSP00000202773	RPL6	947
ENSP00000379353	ST8SIA1	942
ENSP00000368318	PUSL1	941
ENSP00000340736	GYG1	941
ENSP00000266735	SNRPF	937
ENSP00000247933	IDUA	933
ENSP00000318195	NCL	920
ENSP00000387911	PARN	919
ENSP00000364475	FBP1	892
ENSP00000253363	RBM39	890
ENSP00000227163	SPI1	849
ENSP00000253856	ATP6V0A4	817
ENSP00000287038	RPL30	793
ENSP00000358812	PDCD11	706
ENSP00000377892	SRSF5	676
ENSP00000320503	EDC3	628
ENSP00000311888	MGAT1	616
ENSP00000366607	SF1	554
ENSP00000318318	MPI	540
ENSP00000410758	LSM5	376
ENSP00000359939	EXOSC1	346
ENSP00000229319	LDHB	252
ENSP00000282050	ATP5A1	214
ENSP00000261600	THOC1	210
ENSP00000276390	ATP6V1B2	167
ENSP00000324122	PRPF31	150
ENSP00000236067	ATP6V0B	133
ENSP00000351409	CELF1	130
ENSP00000369218	RBM17	126
ENSP00000323046	EXOSC3	110
ENSP00000296581	LSM6	92
ENSP00000216714	APEX1	86
ENSP00000233609	RPS15	84
ENSP00000221233	EXOSC5	67
ENSP00000384573	DAZ1	56
ENSP00000377527	PC	45
ENSP00000369055	B4GALT1	44
ENSP00000290949	ATP6V0D1	42
ENSP00000272252	GALM	40
ENSP00000261304	GALC	39
ENSP00000336927	ALDOA	34
ENSP00000375748	FUT2	33
ENSP00000379766	GALK2	32
ENSP00000385057	APOBEC3G	28
ENSP00000298746	TRUB1	25
ENSP00000367721	NUP160	24
ENSP00000313504	PHKB	22
ENSP00000283646	RPIA	21
ENSP00000296575	HHIP	16
ENSP00000306003	ATP5I	15
ENSP00000405455	TKT	13
ENSP00000336725	DDX3Y	13
ENSP00000362513	UGT1A5	12
ENSP00000308107	HPSE	11
ENSP00000359100	AMY1A	10
ENSP00000331897	IDH2	9
ENSP00000368253	NR0B1	8
ENSP00000304845	UGT1A1	8
ENSP00000262519	SETD1A	7
ENSP00000358719	ME1	6
ENSP00000254940	NIP7	6
ENSP00000215956	NHP2L1	5
ENSP00000355279	CNOT7	5
ENSP00000382392	NOP2	5
ENSP00000346768	UGT1A9	5
ENSP00000216727	PABPN1	4
ENSP00000261416	HEXB	4
ENSP00000302728	GUSB	4
ENSP00000250113	FXR2	4
ENSP00000221801	FBL	4
ENSP00000379680	NAGA	3
ENSP00000217901	IDH3G	3
ENSP00000349168	HNRNPH1	3
ENSP00000366557	CRNKL1	3
ENSP00000380969	THOC5	3
ENSP00000229214	KRR1	3
ENSP00000381216	KHSRP	2
ENSP00000263657	PNO1	2
ENSP00000354951	QKI	2
ENSP00000354347	GFPT1	2
ENSP00000341045	UGT2B15	2
ENSP00000304811	UGT2B7	2
ENSP00000371393	PGM2	2
ENSP00000245206	GOT2	2
ENSP00000268854	DDX52	2
ENSP00000328690	DDX24	1
ENSP00000305692	GAA	1
ENSP00000265564	EXOSC7	1
ENSP00000412788	PTBP2	1
ENSP00000388001	OAS1	1
ENSP00000331327	WT1	1
ENSP00000420821	RPL41	1
ENSP00000350387	HYAL2	1
ENSP00000281087	ATP6V1G3	1
ENSP00000413035	RBFOX2	1
ENSP00000261195	GYS2	1
ENSP00000258772	DDX56	1
ENSP00000257765	KHDC1	1
ENSP00000365837	PUS1	1
ENSP00000252675	FUT5	1
ENSP00000295899	THOC7	0
ENSP00000253329	PPIL4	0
ENSP00000296513	ADAD1	0
ENSP00000232375	PFKFB4	0
ENSP00000296015	TTC14	0
ENSP00000217073	PABPC1L	0
ENSP00000216277	PAPOLA	0
ENSP00000295822	EIF5A2	0
ENSP00000295759	GLB1L	0
ENSP00000295448	GNPDA2	0
ENSP00000216392	PYGL	0
ENSP00000295228	INHBB	0
ENSP00000295119	NUP35	0
ENSP00000295971	RBM47	0
ENSP00000252542	SAFB2	0
ENSP00000252455	PRKCSH	0
ENSP00000233078	DAZAP1	0
ENSP00000298317	RPUSD4	0
ENSP00000298198	PGM2L1	0
ENSP00000252483	PVRL2	0
ENSP00000297990	NOL6	0
ENSP00000232888	RRP9	0
ENSP00000297540	PHAX	0
ENSP00000297071	TRA2A	0
ENSP00000215882	SLC25A1	0
ENSP00000297283	PGAM2	0
ENSP00000297185	HSPA9	0
ENSP00000297183	ANKHD1	0
ENSP00000252603	PGLS	0
ENSP00000294904	RBMS1	0
ENSP00000297625	KIAA1161	0
ENSP00000290921	CTBP1	0
ENSP00000253778	GFPT2	0
ENSP00000292432	HK3	0
ENSP00000292123	SAFB	0
ENSP00000291552	U2AF1	0
ENSP00000291527	TFF1	0
ENSP00000255427	CHIT1	0
ENSP00000292475	ATP5J2	0
ENSP00000229725	NEU1	0
ENSP00000216962	PYGB	0
ENSP00000290583	CELF3	0
ENSP00000256644	HBXIP	0
ENSP00000229390	SRSF9	0
ENSP00000290573	HK2	0
ENSP00000257552	MSI1	0
ENSP00000290341	IGF2BP1	0
ENSP00000291295	CALM3	0
ENSP00000293273	RDM1	0
ENSP00000215793	SF3A1	0
ENSP00000254193	SNRPA1	0
ENSP00000254231	LIN28A	0
ENSP00000294189	RPL29	0
ENSP00000254508	NUP210	0
ENSP00000294064	NEU3	0
ENSP00000255409	CHI3L1	0
ENSP00000293842	RPL26	0
ENSP00000253801	G6PC	0
ENSP00000292879	U2AF1L4	0
ENSP00000292778	YDJC	0
ENSP00000292672	CELF5	0
ENSP00000292476	CPSF4	0
ENSP00000254928	ERAL1	0
ENSP00000255078	IGHMBP2	0
ENSP00000254799	GRSF1	0
ENSP00000243389	SLC36A1	0
ENSP00000040877	TARBP1	0
ENSP00000238714	PAPOLG	0
ENSP00000072644	YIPF1	0
ENSP00000075120	SLC2A3	0
ENSP00000305230	SRP9	0
ENSP00000305221	UGT2B4	0
ENSP00000298717	METTL3	0
ENSP00000242351	ZC3HAV1	0
ENSP00000029410	B4GALT7	0
ENSP00000084795	RPL18	0
ENSP00000304440	HAS3	0
ENSP00000304414	CXCR6	0
ENSP00000244020	SRSF6	0
ENSP00000304139	RBMXL2	0
ENSP00000164139	PYGM	0
ENSP00000240185	TARDBP	0
ENSP00000234677	SARS	0
ENSP00000308012	PABPC5	0
ENSP00000236709	A4GNT	0
ENSP00000307911	CHST2	0
ENSP00000307889	RPL13	0
ENSP00000235835	AKR7A2	0
ENSP00000007264	RPUSD1	0
ENSP00000238688	SLIRP	0
ENSP00000307181	FAM103A1	0
ENSP00000238146	DDX55	0
ENSP00000026218	PIGQ	0
ENSP00000306565	ISG20	0
ENSP00000306459	B4GALT6	0
ENSP00000306117	DDX19A	0
ENSP00000306080	RNMTL1	0
ENSP00000028008	RNASET2	0
ENSP00000302886	PA2G4	0
ENSP00000307774	ZNF239	0
ENSP00000251566	UGT2A3	0
ENSP00000303174	UGT1A6	0
ENSP00000250156	MRM1	0
ENSP00000251038	ZC3H14	0
ENSP00000300688	ATP5L	0
ENSP00000211372	RPS18	0
ENSP00000251071	CAPRIN2	0
ENSP00000233840	NEU2	0
ENSP00000251074	NUP37	0
ENSP00000301788	POLR2G	0
ENSP00000300146	PATL1	0
ENSP00000299767	HSP90B1	0
ENSP00000251607	TRNT1	0
ENSP00000299213	LARP6	0
ENSP00000252115	POLDIP3	0
ENSP00000298875	CPSF2	0
ENSP00000287202	CELF6	0
ENSP00000233468	AC008073.5	0
ENSP00000246194	RALY	0
ENSP00000252136	TRMT2A	0
ENSP00000196169	TDRD3	0
ENSP00000244669	APOBEC2	0
ENSP00000244769	ATXN1	0
ENSP00000245539	MRPS7	0
ENSP00000302599	FUT9	0
ENSP00000209873	AAAS	0
ENSP00000245544	NUP85	0
ENSP00000302896	RPS9	0
ENSP00000198939	CHERP	0
ENSP00000302393	LDHAL6B	0
ENSP00000302194	ATP6V1G2	0
ENSP00000199320	DIMT1	0
ENSP00000247001	SUGP1	0
ENSP00000247003	DDX49	0
ENSP00000207870	XYLB	0
ENSP00000302485	CSDC2	0
ENSP00000225388	NUFIP2	0
ENSP00000261741	RBM19	0
ENSP00000262633	RBM42	0
ENSP00000267422	NOVA1	0
ENSP00000262715	TEP1	0
ENSP00000267287	MBNL2	0
ENSP00000267229	RBM26	0
ENSP00000267978	MAN2C1	0
ENSP00000262794	MOV10L1	0
ENSP00000262173	RNMT	0
ENSP00000225430	RPL19	0
ENSP00000266529	ZCRB1	0
ENSP00000227474	PUS3	0
ENSP00000266088	SLC5A1	0
ENSP00000262999	UCP1	0
ENSP00000266031	HYAL1	0
ENSP00000267197	SETD1B	0
ENSP00000228928	OAS3	0
ENSP00000288666	RPS4Y2	0
ENSP00000261951	CNOT6	0
ENSP00000229003	ENDOU	0
ENSP00000269848	PFKL	0
ENSP00000222574	HBP1	0
ENSP00000223026	HYAL4	0
ENSP00000262415	DHX8	0
ENSP00000262031	RBMS2	0
ENSP00000265997	CPEB3	0
ENSP00000268661	RPL3L	0
ENSP00000268605	NOL3	0
ENSP00000264029	TREH	0
ENSP00000262052	SLC11A2	0
ENSP00000228843	RAD51AP1	0
ENSP00000268164	ST8SIA2	0
ENSP00000269097	G6PC3	0
ENSP00000225696	NUP88	0
ENSP00000225831	CCL2	0
ENSP00000265085	CPEB4	0
ENSP00000265069	ZFR	0
ENSP00000265000	GALNT7	0
ENSP00000264995	MRPL3	0
ENSP00000264968	MGAT4A	0
ENSP00000225519	SHPK	0
ENSP00000264883	NUP54	0
ENSP00000265271	RBM27	0
ENSP00000264717	GCKR	0
ENSP00000264663	NNT	0
ENSP00000264649	ATP6V0A1	0
ENSP00000264645	CASC3	0
ENSP00000264447	ZNF638	0
ENSP00000264382	SI	0
ENSP00000225665	SLC25A11	0
ENSP00000265631	SLC25A13	0
ENSP00000271764	EIF2D	0
ENSP00000265866	HNRNPH3	0
ENSP00000263032	NXF5	0
ENSP00000265753	EIF4H	0
ENSP00000265732	RBM48	0
ENSP00000263063	MTPAP	0
ENSP00000265093	ATP6V0E1	0
ENSP00000263257	NOVA2	0
ENSP00000265097	THOC3	0
ENSP00000263576	DDX25	0
ENSP00000263736	SRBD1	0
ENSP00000265403	UGT2B10	0
ENSP00000226253	ALDOC	0
ENSP00000264018	DDX6	0
ENSP00000265351	XPO5	0
ENSP00000266022	RBM6	0
ENSP00000263239	DDX18	0
ENSP00000282541	GPD1L	0
ENSP00000271628	SF3B4	0
ENSP00000258742	NUPL2	0
ENSP00000283628	UBP1	0
ENSP00000220496	DNAJC17	0
ENSP00000258886	IREB2	0
ENSP00000220959	UBR5	0
ENSP00000283977	PGM3	0
ENSP00000260184	DDX60L	0
ENSP00000284727	ATP5G3	0
ENSP00000282507	UGT3A2	0
ENSP00000282486	MBNL1	0
ENSP00000260598	KHK	0
ENSP00000282388	ZFP36L2	0
ENSP00000260619	THUMPD2	0
ENSP00000281828	FARSB	0
ENSP00000259997	CPEB2	0
ENSP00000258169	MPHOSPH6	0
ENSP00000288071	DDX19B	0
ENSP00000264211	EIF4G3	0
ENSP00000257570	OASL	0
ENSP00000257622	POM121	0
ENSP00000286835	SCAF4	0
ENSP00000218032	TLR8	0
ENSP00000258729	IGF2BP3	0
ENSP00000286070	RBM45	0
ENSP00000281156	KHDRBS2	0
ENSP00000285968	NUP205	0
ENSP00000218364	HTATSF1	0
ENSP00000285814	MKI67IP	0
ENSP00000285599	MAN2B2	0
ENSP00000258383	MRPL44	0
ENSP00000258416	EIF4E2	0
ENSP00000286604	UGT2A1	0
ENSP00000272444	DUSP11	0
ENSP00000274278	UGT3A1	0
ENSP00000274242	RPL37	0
ENSP00000274054	NAF1	0
ENSP00000221975	RPS19	0
ENSP00000261479	PSMA6	0
ENSP00000273283	ITIH1	0
ENSP00000281722	RBM46	0
ENSP00000261483	MAN2A1	0
ENSP00000275820	NOM1	0
ENSP00000272418	MRPS5	0
ENSP00000272348	SNRPG	0
ENSP00000272298	CALM2	0
ENSP00000261592	NOL4	0
ENSP00000261674	SFSWAP	0
ENSP00000222286	GAPDHS	0
ENSP00000222247	RPL18A	0
ENSP00000229277	ENO2	0
ENSP00000223073	RBM28	0
ENSP00000260649	SLC3A1	0
ENSP00000260665	LRPPRC	0
ENSP00000221403	DHDH	0
ENSP00000280706	LDHAL6A	0
ENSP00000280704	LDHC	0
ENSP00000221770	POP4	0
ENSP00000279259	FAU	0
ENSP00000274849	ABT1	0
ENSP00000278279	TUT1	0
ENSP00000278070	PPRC1	0
ENSP00000277165	FAM120A	0
ENSP00000260956	SSB	0
ENSP00000276079	NONO	0
ENSP00000276055	CHST7	0
ENSP00000281589	PABPC3	0
ENSP00000280154	PDCD4	0
ENSP00000364145	PFKFB1	0
ENSP00000362993	BICC1	0
ENSP00000365946	RBM3	0
ENSP00000365694	PPP1R10	0
ENSP00000365370	HNRNPCL1	0
ENSP00000364912	SPEN	0
ENSP00000364883	AUH	0
ENSP00000364782	NEU1	0
ENSP00000364639	RBM7	0
ENSP00000364578	RDBP	0
ENSP00000364543	SKIV2L	0
ENSP00000366519	NSUN6	0
ENSP00000364448	UPF3A	0
ENSP00000366549	ST3GAL5	0
ENSP00000363988	ALDOB	0
ENSP00000363745	HNRNPR	0
ENSP00000363603	FUCA1	0
ENSP00000363573	BX511012.1	0
ENSP00000363533	MDH1B	0
ENSP00000363516	RCAN3	0
ENSP00000363373	PTBP3	0
ENSP00000363162	ATP6V1G1	0
ENSP00000363095	TRIM32	0
ENSP00000370713	ADARB2	0
ENSP00000364512	G6PC2	0
ENSP00000368459	NUFIP1	0
ENSP00000321449	RRP7A	0
ENSP00000370532	GTF3A	0
ENSP00000370517	PFKP	0
ENSP00000369887	SLTM	0
ENSP00000369460	ELAVL2	0
ENSP00000369442	KL	0
ENSP00000369396	SLC4A11	0
ENSP00000369100	PFKFB3	0
ENSP00000368984	EXOSC9	0
ENSP00000368881	KIN	0
ENSP00000366488	PRKACG	0
ENSP00000368667	DDX53	0
ENSP00000362936	TRNAU1AP	0
ENSP00000367609	PABPN1L	0
ENSP00000367498	LRRC47	0
ENSP00000367124	SLC3A2	0
ENSP00000367030	TRDMT1	0
ENSP00000366997	DIS3	0
ENSP00000366934	NOL9	0
ENSP00000366927	ALDH1B1	0
ENSP00000366829	RBM10	0
ENSP00000366641	SLC2A5	0
ENSP00000366620	H6PD	0
ENSP00000368754	BAZ2A	0
ENSP00000359688	RPF1	0
ENSP00000363018	RPL10A	0
ENSP00000360922	STAU1	0
ENSP00000360829	GLT6D1	0
ENSP00000360776	B4GALT5	0
ENSP00000360365	MCTS1	0
ENSP00000360262	FGGY	0
ENSP00000360215	ZBP1	0
ENSP00000360112	RAVER2	0
ENSP00000359991	PGAM1	0
ENSP00000359988	SRSF11	0
ENSP00000361076	RPL7A	0
ENSP00000359719	PRKACB	0
ENSP00000361092	SURF6	0
ENSP00000359664	CTBS	0
ENSP00000359645	RBMX	0
ENSP00000359583	HPSE2	0
ENSP00000359396	DPPA5	0
ENSP00000359384	OOEP	0
ENSP00000359361	DDX43	0
ENSP00000359096	AMY1C	0
ENSP00000359049	HENMT1	0
ENSP00000358799	RBM15	0
ENSP00000358777	ATP6AP1	0
ENSP00000359804	FUBP1	0
ENSP00000362207	CHST3	0
ENSP00000362744	RPS4X	0
ENSP00000362687	DDX50	0
ENSP00000362643	PHKA1	0
ENSP00000362621	PABPC1L2B	0
ENSP00000362618	PABPC1L2A	0
ENSP00000362549	UGT1A8	0
ENSP00000362525	UGT1A7	0
ENSP00000362508	UGT1A4	0
ENSP00000362469	SLC2A8	0
ENSP00000362306	EIF2C4	0
ENSP00000361047	ALG13	0
ENSP00000362287	EIF2C3	0
ENSP00000370930	MRPL23	0
ENSP00000361982	TRUB2	0
ENSP00000361949	PABPC4	0
ENSP00000361927	HNRNPH2	0
ENSP00000361843	NXF2	0
ENSP00000361835	NXF2B	0
ENSP00000361658	NUP188	0
ENSP00000361557	RBM41	0
ENSP00000361512	PRPS1	0
ENSP00000361302	POMT1	0
ENSP00000361232	DDX31	0
ENSP00000362300	EIF2C1	0
ENSP00000393275	NANOS1	0
ENSP00000387006	CWC22	0
ENSP00000403175	RPS18	0
ENSP00000401067	NEU1	0
ENSP00000400626	SKIV2L	0
ENSP00000399530	SKIV2L	0
ENSP00000399309	NEU1	0
ENSP00000396615	GLB1L3	0
ENSP00000395473	MAN2B1	0
ENSP00000395337	LDHA	0
ENSP00000394400	SKIV2L	0
ENSP00000403683	NABP1	0
ENSP00000393324	EIF4E3	0
ENSP00000403720	NEU1	0
ENSP00000393241	RPS18	0
ENSP00000392601	DHX30	0
ENSP00000391774	CPSF6	0
ENSP00000391723	PUM1	0
ENSP00000391432	RNPC3	0
ENSP00000389951	CELF2	0
ENSP00000389649	ATP5J	0
ENSP00000388658	SLC25A12	0
ENSP00000387185	ATHL1	0
ENSP00000370555	GYG2	0
ENSP00000394085	JMJD6	0
ENSP00000412310	SKIV2L	0
ENSP00000420270	UHMK1	0
ENSP00000420195	SRSF10	0
ENSP00000418532	UGT1A3	0
ENSP00000418001	GK5	0
ENSP00000416293	SLC2A1	0
ENSP00000416110	RPS18	0
ENSP00000415822	ATXN1L	0
ENSP00000415464	LARP4	0
ENSP00000414302	SRSF12	0
ENSP00000413625	FNBP1	0
ENSP00000403310	SNRNP35	0
ENSP00000412583	RPS18	0
ENSP00000386717	RPL31	0
ENSP00000411672	ATP6V0E2	0
ENSP00000409489	NEU1	0
ENSP00000409315	RBM18	0
ENSP00000408957	NEU1	0
ENSP00000408395	RBFOX3	0
ENSP00000408207	NEU1	0
ENSP00000407310	PPP1R10	0
ENSP00000407181	PPP1R10	0
ENSP00000406389	ATP6V1G2	0
ENSP00000406372	ATP6V1G2	0
ENSP00000413222	ATP6V1G2	0
ENSP00000374219	ALKBH8	0
ENSP00000387088	HNRPLL	0
ENSP00000379500	UEVLD	0
ENSP00000379203	ATP6V1C1	0
ENSP00000379144	TNRC6A	0
ENSP00000378504	NXF3	0
ENSP00000378461	PCBP4	0
ENSP00000378160	RPL34	0
ENSP00000377878	ATP5G2	0
ENSP00000377344	DDX60	0
ENSP00000376465	GALNT3	0
ENSP00000379678	PGM5	0
ENSP00000375133	ZRSR1	0
ENSP00000379760	RSL1D1	0
ENSP00000373331	RPUSD3	0
ENSP00000373277	RBMS3	0
ENSP00000372995	ATP6V1G2	0
ENSP00000372827	SKIV2L	0
ENSP00000372484	RBMY1B	0
ENSP00000372459	CTIF	0
ENSP00000371870	DAZ2	0
ENSP00000371802	DAZ3	0
ENSP00000371634	IGF2BP2	0
ENSP00000371155	NUPL1	0
ENSP00000376309	HNRNPA3	0
ENSP00000383301	ZNF74	0
ENSP00000386711	JAKMIP1	0
ENSP00000386156	WIBG	0
ENSP00000385610	MEX3C	0
ENSP00000385149	NEU4	0
ENSP00000384753	ANKLE1	0
ENSP00000384703	DDX11	0
ENSP00000384700	PAPOLB	0
ENSP00000384523	NFIA	0
ENSP00000384408	PARG	0
ENSP00000384398	MEX3D	0
ENSP00000379654	KIAA0430	0
ENSP00000383421	RBM11	0
ENSP00000358635	SYNCRIP	0
ENSP00000383168	PCBP3	0
ENSP00000382840	DDX3X	0
ENSP00000382779	SEH1L	0
ENSP00000382373	DAZL	0
ENSP00000382239	RBM12B	0
ENSP00000381031	EWSR1	0
ENSP00000380982	KIAA0020	0
ENSP00000380514	HAGH	0
ENSP00000380495	DDX51	0
ENSP00000380414	DEK	0
ENSP00000384160	RBM33	0
ENSP00000323740	UCP3	0
ENSP00000321179	RBM44	0
ENSP00000327459	APOBEC3B	0
ENSP00000326777	MTHFSD	0
ENSP00000326531	THOC6	0
ENSP00000326227	GANC	0
ENSP00000326128	LARP4B	0
ENSP00000326003	PUS10	0
ENSP00000325905	SRSF7	0
ENSP00000325376	HNRNPM	0
ENSP00000324827	AKAP17A	0
ENSP00000328983	CHST6	0
ENSP00000323858	DDX54	0
ENSP00000329757	ATP6V0C	0
ENSP00000323714	EIF4E1B	0
ENSP00000323568	SLC2A2	0
ENSP00000323288	RPUSD2	0
ENSP00000322419	RPLP2	0
ENSP00000322376	U2SURP	0
ENSP00000322234	SYNJ1	0
ENSP00000322016	PUF60	0
ENSP00000321711	DIS3L	0
ENSP00000002165	FUCA2	0
ENSP00000358763	CHI3L2	0
ENSP00000324203	WRAP53	0
ENSP00000332340	DDX28	0
ENSP00000338477	HNRNPF	0
ENSP00000337926	SUGP2	0
ENSP00000337854	HEXDC	0
ENSP00000337736	AKAP1	0
ENSP00000337632	SARNP	0
ENSP00000337425	HYAL3	0
ENSP00000336752	FIP1L1	0
ENSP00000336543	SNURF	0
ENSP00000334276	UGT2B28	0
ENSP00000334223	SLC36A2	0
ENSP00000327943	SLC5A2	0
ENSP00000332444	CSTF2T	0
ENSP00000320965	B4GALT3	0
ENSP00000332247	ATP6V0A2	0
ENSP00000331907	DHX34	0
ENSP00000331831	GAS6	0
ENSP00000330918	PGP	0
ENSP00000330601	HHIPL1	0
ENSP00000330484	AMY1B	0
ENSP00000330460	DDX59	0
ENSP00000330349	DDX41	0
ENSP00000330031	PIWIL3	0
ENSP00000329918	MEX3B	0
ENSP00000333837	MRPL12	0
ENSP00000310471	RBM4B	0
ENSP00000321343	ST8SIA5	0
ENSP00000312066	SRP68	0
ENSP00000312042	HDLBP	0
ENSP00000312029	UCP2	0
ENSP00000311876	GNPDA1	0
ENSP00000311825	CTBP2	0
ENSP00000311747	RBM14	0
ENSP00000311677	PPP1R8	0
ENSP00000311648	UGT8	0
ENSP00000311221	ZMAT3	0
ENSP00000312649	PPARGC1B	0
ENSP00000310771	GRB7	0
ENSP00000312769	PPIE	0
ENSP00000310015	ADAT1	0
ENSP00000309830	RPL38	0
ENSP00000309749	APOBEC3F	0
ENSP00000309591	PRKACA	0
ENSP00000309558	TAF15	0
ENSP00000309477	ACO1	0
ENSP00000309334	RPL15	0
ENSP00000309270	CHST1	0
ENSP00000309175	EIF1AD	0
ENSP00000309166	RBM4	0
ENSP00000310998	NAGPA	0
ENSP00000316228	CLEC4M	0
ENSP00000320461	ASCC1	0
ENSP00000320401	UGT2B17	0
ENSP00000319814	PCK1	0
ENSP00000319240	MAGOHB	0
ENSP00000319104	SUPT6H	0
ENSP00000318646	RPS15A	0
ENSP00000318415	RBMXL1	0
ENSP00000318177	FUBP3	0
ENSP00000318115	TIMM50	0
ENSP00000317691	RPP25	0
ENSP00000312250	ADPGK	0
ENSP00000316950	MYEF2	0
ENSP00000338838	CHID1	0
ENSP00000316042	HNRNPA0	0
ENSP00000315569	DIS3L2	0
ENSP00000315477	CD209	0
ENSP00000315017	MRPL1	0
ENSP00000314348	DDX10	0
ENSP00000314311	LARP7	0
ENSP00000313890	RBM15B	0
ENSP00000313350	RNASEH1	0
ENSP00000313199	HNRNPD	0
ENSP00000313007	PABPC1	0
ENSP00000317027	GCNT4	0
ENSP00000352144	B4GALT4	0
ENSP00000338487	MGAT4B	0
ENSP00000353920	ADARB1	0
ENSP00000353769	SCAF1	0
ENSP00000353655	MAN2A2	0
ENSP00000352956	RBM23	0
ENSP00000352911	NUDT16	0
ENSP00000352738	G3BP2	0
ENSP00000352678	SUPV3L1	0
ENSP00000352668	RBM12	0
ENSP00000352438	PCBP2	0
ENSP00000354580	MRPL21	0
ENSP00000352162	ELAVL3	0
ENSP00000354632	MT-ATP6	0
ENSP00000351706	GK2	0
ENSP00000351416	ANKRD17	0
ENSP00000351108	HNRNPAB	0
ENSP00000350877	SRSF2	0
ENSP00000350698	DDX47	0
ENSP00000350409	UNC50	0
ENSP00000350170	FXR1	0
ENSP00000350090	HNRNPA1L2	0
ENSP00000350028	MOV10	0
ENSP00000349594	ELAVL4	0
ENSP00000352308	DDX42	0
ENSP00000356411	TROVE2	0
ENSP00000308334	ATP5S	0
ENSP00000358605	SMNDC1	0
ENSP00000358565	SLC35A1	0
ENSP00000358532	RBM20	0
ENSP00000358089	TIAL1	0
ENSP00000357812	TDRKH	0
ENSP00000357683	CHTOP	0
ENSP00000357459	ADAR	0
ENSP00000357384	DPM3	0
ENSP00000356530	RNASEL	0
ENSP00000354346	MATR3	0
ENSP00000356448	TPR	0
ENSP00000348984	SON	0
ENSP00000356146	SCAF8	0
ENSP00000356047	PFKFB2	0
ENSP00000355890	EPRS	0
ENSP00000355565	RBM34	0
ENSP00000355315	RPL39	0
ENSP00000355273	ST6GAL2	0
ENSP00000355265	J01415.25	0
ENSP00000355028	DZIP3	0
ENSP00000355011	ILF2	0
ENSP00000354722	EIF1AY	0
ENSP00000356476	TRMT1L	0
ENSP00000341206	CHST4	0
ENSP00000343490	LCTL	0
ENSP00000343488	EARS2	0
ENSP00000343081	PUS7L	0
ENSP00000343054	RBM5	0
ENSP00000342278	OAS2	0
ENSP00000342262	NUP43	0
ENSP00000342118	HHIPL2	0
ENSP00000342032	BPGM	0
ENSP00000341992	NANOS3	0
ENSP00000341885	RPS2	0
ENSP00000349293	B4GALT2	0
ENSP00000341285	HNRNPA1L2	0
ENSP00000343838	UGT1A10	0
ENSP00000341021	NANOS2	0
ENSP00000340466	GANAB	0
ENSP00000340329	CAPRIN1	0
ENSP00000340281	EIF4G2	0
ENSP00000339845	DROSHA	0
ENSP00000339795	RPL7	0
ENSP00000339532	THUMPD3	0
ENSP00000339095	RPS7	0
ENSP00000339090	RBMX2	0
ENSP00000358747	OVGP1	0
ENSP00000341828	CHIA	0
ENSP00000346001	RPL3	0
ENSP00000338783	CHST5	0
ENSP00000348722	PUS7	0
ENSP00000348205	ATP5G1	0
ENSP00000348108	KHDRBS3	0
ENSP00000348107	C1D	0
ENSP00000348026	STAU2	0
ENSP00000347792	SYNJ2	0
ENSP00000346236	DDX46	0
ENSP00000346088	RPL22	0
ENSP00000346050	RPS3A	0
ENSP00000343557	ZCCHC17	0
ENSP00000346027	RPL21	0
ENSP00000343782	ADRB3	0
ENSP00000345895	NUP50	0
ENSP00000345849	SPAM1	0
ENSP00000345580	SLC25A10	0
ENSP00000345412	CPSF7	0
ENSP00000345156	RPL14	0
ENSP00000345096	IMPDH1	0
ENSP00000344659	GLB1L2	0
ENSP00000344401	LIN28B	0
ENSP00000343966	PSPC1	0
ENSP00000343900	CPSF4L	0
ENSP00000349181	HVCN1	0
ENSP00000346037	RPLP1	0

## Sheet: RHI shortest path proteins
RHI Shortest path human proteins
Ensembl Protein ID	Gene	Betweenness
ENSP00000344818	UBC	330154
ENSP00000363676	RPL11	154993
ENSP00000361626	YBX1	136548
ENSP00000357879	PSMD4	121991
ENSP00000337825	LCK	117195
ENSP00000396127	RAN	116059
ENSP00000348461	RAC1	111632
ENSP00000230354	TBP	100485
ENSP00000350283	BRCA1	65076
ENSP00000314949	POLR2A	54470
ENSP00000280892	EIF4E	50359
ENSP00000352400	NUP214	46002
ENSP00000294172	NXF1	45246
ENSP00000308541	F2	44499
ENSP00000359345	RPL5	43884
ENSP00000400591	SNRPE	42438
ENSP00000283195	RANBP2	42125
ENSP00000359206	BTRC	38829
ENSP00000388107	UBA52	37711
ENSP00000343535	USP7	34512
ENSP00000256443	CDK7	31679
ENSP00000011653	CD4	28371
ENSP00000358563	DKC1	26972
ENSP00000285398	ERCC3	26644
ENSP00000321584	IMPDH2	25300
ENSP00000351777	VCP	24604
ENSP00000220592	EIF2C2	24521
ENSP00000252816	LSM4	24187
ENSP00000335153	HSP90AA1	23732
ENSP00000260947	BARD1	23329
ENSP00000325448	KARS	22347
ENSP00000310596	LSM1	22269
ENSP00000352312	DNAH8	22117
ENSP00000315644	TYMS	21827
ENSP00000278572	RPS3	20743
ENSP00000318297	RUVBL1	20742
ENSP00000210313	PSMD5	20517
ENSP00000256383	EIF2S1	20303
ENSP00000357656	FYN	19935
ENSP00000305503	NUP62	19843
ENSP00000217109	CSTF1	19561
ENSP00000262077	NUP153	19525
ENSP00000003084	CFTR	19096
ENSP00000264951	XRN1	18649
ENSP00000348708	UPF2	18457
ENSP00000315791	CSTF3	17692
ENSP00000209728	CDC6	17429
ENSP00000315859	RNPS1	17409
ENSP00000231487	SKP1	16239
ENSP00000306606	ADH1B	16187
ENSP00000333001	RBM8A	16090
ENSP00000298139	WRN	16013
ENSP00000351273	CASP8	15634
ENSP00000340858	B2M	15486
ENSP00000311430	RPL4	15221
ENSP00000267868	RAD51	15188
ENSP00000380349	CAPN3	14417
ENSP00000369757	RPS6	14062
ENSP00000353059	APAF1	14059
ENSP00000313829	KHDRBS1	13736
ENSP00000309572	TERT	13302
ENSP00000296930	NPM1	13255
ENSP00000225504	SUPT4H1	13242
ENSP00000308938	PLG	12661
ENSP00000246533	CAPNS1	12540
ENSP00000361850	PLAU	12371
ENSP00000261396	NUP133	12217
ENSP00000360286	RAE1	12119
ENSP00000331817	ALYREF	11707
ENSP00000205402	DLD	11692
ENSP00000343745	DICER1	11388
ENSP00000251968	TSG101	11363
ENSP00000263817	ABCB11	11328
ENSP00000290158	KPNB1	11272
ENSP00000262193	PSMB1	10563
ENSP00000219070	MMP2	10549
ENSP00000250495	NEDD8	10333
ENSP00000310129	PSMD2	10237
ENSP00000009589	RPS20	9699
ENSP00000316879	EIF4G1	9628
ENSP00000346022	RPL9	9622
ENSP00000264867	PPARGC1A	9592
ENSP00000342070	CTSB	9507
ENSP00000406797	PSMB8	9501
ENSP00000362361	CDK9	9490
ENSP00000311028	RPS14	9489
ENSP00000268171	FURIN	9470
ENSP00000300060	ANPEP	9445
ENSP00000366084	ABCC4	9404
ENSP00000278407	SERPING1	9296
ENSP00000377148	AP1G1	8922
ENSP00000276201	UPF3B	8808
ENSP00000362063	CSTF2	8764
ENSP00000302160	LSM3	8503
ENSP00000346015	RPL27A	8312
ENSP00000256474	VHL	8239
ENSP00000229179	NUP107	8217
ENSP00000221448	SNRNP70	7873
ENSP00000364709	F10	7764
ENSP00000290541	PSMB4	7764
ENSP00000257770	NT5E	7743
ENSP00000196551	RPS5	7642
ENSP00000307863	U2AF2	7600
ENSP00000283684	ATP8B1	7573
ENSP00000364270	XPA	7555
ENSP00000220764	DECR1	7545
ENSP00000358918	SUFU	7499
ENSP00000263094	ABCA7	7498
ENSP00000233609	RPS15	7439
ENSP00000346437	ATG7	7410
ENSP00000261772	AARS	7360
ENSP00000354739	RPL12	7191
ENSP00000219255	PARD6A	7187
ENSP00000223321	PSMA2	7113
ENSP00000373715	DCP2	6998
ENSP00000292303	CCR5	6807
ENSP00000293677	RAVER1	6698
ENSP00000314151	KLK3	6657
ENSP00000346694	HNRNPA2B1	6567
ENSP00000297261	SHH	6562
ENSP00000245539	MRPS7	6539
ENSP00000311032	CASP3	6498
ENSP00000326261	SRRM1	6379
ENSP00000251453	RPS16	6334
ENSP00000259457	PSMB7	6171
ENSP00000363868	ABCA1	5992
ENSP00000359531	GTF2B	5876
ENSP00000360525	MAGOH	5805
ENSP00000262238	YY1	5784
ENSP00000350512	COPS5	5750
ENSP00000238112	CPSF3	5731
ENSP00000354280	PRSS3	5710
ENSP00000339495	COBRA1	5705
ENSP00000259469	RPL35	5704
ENSP00000349428	PTBP1	5701
ENSP00000360532	CDC5L	5699
ENSP00000263317	NOX4	5698
ENSP00000266079	PRPF6	5697
ENSP00000265421	POLB	5692
ENSP00000300107	CLPX	5691
ENSP00000216774	SRP54	5690
ENSP00000356520	DHX9	5687
ENSP00000365439	HNRNPK	5680
ENSP00000318195	NCL	5674
ENSP00000202773	RPL6	5664
ENSP00000250784	RPS4Y1	5657
ENSP00000354125	EIF3B	5655
ENSP00000351926	AP2A1	5621
ENSP00000352516	DNMT1	5329
ENSP00000386884	CXCR4	5321
ENSP00000256897	CCNH	5316
ENSP00000353224	TFRC	5230
ENSP00000339095	RPS7	5159
ENSP00000216225	RBX1	4771
ENSP00000262803	UPF1	4746
ENSP00000304350	PRPF8	4700
ENSP00000339027	RPLP0	4651
ENSP00000316032	NUP98	4616
ENSP00000221975	RPS19	4449
ENSP00000377969	GTF2F1	4419
ENSP00000258962	SRSF1	4301
ENSP00000262584	RPL8	4256
ENSP00000262027	MARS	4107
ENSP00000310275	BANF1	4063
ENSP00000366135	EXOSC10	3962
ENSP00000328173	C1S	3919
ENSP00000234071	PROC	3900
ENSP00000229304	APOBEC1	3900
ENSP00000373918	GARS	3880
ENSP00000287038	RPL30	3872
ENSP00000353731	DPP4	3856
ENSP00000370119	SMN2	3834
ENSP00000221419	HNRNPL	3812
ENSP00000295488	HELQ	3801
ENSP00000298556	HPRT1	3801
ENSP00000351314	PSMB10	3801
ENSP00000348578	G3BP1	3801
ENSP00000265727	ADAM22	3800
ENSP00000264718	GPN1	3800
ENSP00000410076	CASP1	3800
ENSP00000304592	FASN	3800
ENSP00000341826	HNRNPA1	3800
ENSP00000377783	PROS1	3798
ENSP00000310668	NUP93	3797
ENSP00000216297	SUPT16H	3797
ENSP00000295959	RPP14	3795
ENSP00000314792	BOLL	3795
ENSP00000245838	THOC2	3794
ENSP00000366843	ATXN2	3793
ENSP00000228140	RPS13	3792
ENSP00000347495	WARS	3792
ENSP00000254950	VPS4A	3791
ENSP00000221413	RUVBL2	3788
ENSP00000226299	LAP3	3785
ENSP00000156084	OTUD5	3785
ENSP00000361845	ZMPSTE24	3783
ENSP00000317985	ROCK2	3783
ENSP00000302768	PAIP1	3783
ENSP00000386161	WWOX	3778
ENSP00000338173	PUM2	3766
ENSP00000258080	HTRA2	3762
ENSP00000318631	HSD17B6	3747
ENSP00000300289	PDIA3	3739
ENSP00000361405	MMP9	3711
ENSP00000336565	ZNF446	3689
ENSP00000368798	MBTPS2	3656
ENSP00000381045	UBE3A	3643
ENSP00000295006	CAPN2	3636
ENSP00000300291	NUDT21	3589
ENSP00000250144	MMP28	3532
ENSP00000262030	ATP5B	3487
ENSP00000398597	EXOSC6	3471
ENSP00000300413	SNRPD1	3419
ENSP00000355890	EPRS	3385
ENSP00000219252	POLR2C	3379
ENSP00000294785	NCSTN	3365
ENSP00000268220	SEC11A	3268
ENSP00000320503	EDC3	3122
ENSP00000310572	PSMC5	3103
ENSP00000410758	LSM5	3057
ENSP00000362820	SRSF3	2993
ENSP00000292807	AP2M1	2966
ENSP00000375863	HNRNPUL1	2620
ENSP00000302896	RPS9	2589
ENSP00000229854	MCM3	2569
ENSP00000227163	SPI1	2479
ENSP00000303634	LRP8	2367
ENSP00000324890	CD28	2343
ENSP00000254108	FUS	2202
ENSP00000220809	PLAT	2175
ENSP00000327070	MDH2	2156
ENSP00000347271	RPS10	2037
ENSP00000364289	NCBP1	2022
ENSP00000336702	EIF5A	2015
ENSP00000296223	POLR2H	2003
ENSP00000310688	ABCD2	1994
ENSP00000401802	PSMC6	1989
ENSP00000379339	RPS29	1977
ENSP00000265963	GTF2H1	1972
ENSP00000368682	PHEX	1955
ENSP00000358424	HSD3B2	1953
ENSP00000352257	XRCC6	1948
ENSP00000216341	GZMB	1945
ENSP00000283875	GTF2E1	1944
ENSP00000359233	ABCD3	1927
ENSP00000353741	ETF1	1912
ENSP00000245816	CLPP	1911
ENSP00000356975	ADAMTS4	1910
ENSP00000362576	YARS	1908
ENSP00000336725	DDX3Y	1907
ENSP00000325421	PARL	1905
ENSP00000231572	RARS	1902
ENSP00000359506	FMR1	1902
ENSP00000221486	RNASEH2A	1902
ENSP00000261180	TRHDE	1902
ENSP00000370589	NOP56	1902
ENSP00000282641	A1CF	1901
ENSP00000327583	RANBP1	1901
ENSP00000316176	UBE2N	1901
ENSP00000261900	CCNT1	1901
ENSP00000350877	SRSF2	1901
ENSP00000262315	CHTF18	1901
ENSP00000359958	ZRANB2	1901
ENSP00000324438	RPS21	1901
ENSP00000267884	SRP14	1901
ENSP00000325312	METAP2	1901
ENSP00000331831	GAS6	1901
ENSP00000349748	SFPQ	1901
ENSP00000370083	SMN1	1901
ENSP00000263974	TAF12	1901
ENSP00000260228	MMP20	1901
ENSP00000336606	RAD54B	1901
ENSP00000366565	VPS28	1901
ENSP00000280056	DHRS12	1901
ENSP00000295055	CAPN13	1901
ENSP00000338371	TNRC6B	1901
ENSP00000322629	CTRL	1901
ENSP00000353575	EIF2B3	1901
ENSP00000396813	PSMB9	1901
ENSP00000225792	DDX5	1901
ENSP00000296412	ADH5	1901
ENSP00000229268	USP5	1901
ENSP00000417132	BAP1	1901
ENSP00000231498	NUP155	1901
ENSP00000377040	AASS	1901
ENSP00000301995	SCAND1	1901
ENSP00000307004	APLF	1901
ENSP00000374467	ABCC8	1901
ENSP00000362306	EIF2C4	1900
ENSP00000377640	RPL24	1900
ENSP00000265523	BLVRA	1900
ENSP00000296754	ERAP1	1900
ENSP00000377055	PRCP	1900
ENSP00000262173	RNMT	1900
ENSP00000254436	TRIM21	1900
ENSP00000305556	PCBP1	1900
ENSP00000292614	POLR2J	1900
ENSP00000325425	MAT2B	1900
ENSP00000364119	EIF2S2	1900
ENSP00000260302	MMP13	1899
ENSP00000262626	HPN	1899
ENSP00000348442	PSMD12	1899
ENSP00000281456	SLC25A4	1899
ENSP00000346120	DDX21	1899
ENSP00000368927	EIF1AX	1899
ENSP00000284984	ADAMTS1	1898
ENSP00000364697	PROZ	1898
ENSP00000243563	SNRPA	1898
ENSP00000283179	HNRNPU	1898
ENSP00000281828	FARSB	1898
ENSP00000354340	UBA3	1898
ENSP00000281156	KHDRBS2	1897
ENSP00000171214	RDH8	1897
ENSP00000343526	USP1	1897
ENSP00000290349	CBR1	1897
ENSP00000265564	EXOSC7	1897
ENSP00000228284	SART3	1897
ENSP00000319690	HNRNPC	1896
ENSP00000393953	PNPT1	1896
ENSP00000245551	MIF4GD	1896
ENSP00000350352	TRMT1	1895
ENSP00000401177	NOL8	1894
ENSP00000313875	CD46	1894
ENSP00000222574	HBP1	1894
ENSP00000250378	CMA1	1894
ENSP00000326981	IMP3	1893
ENSP00000309117	RBFOX1	1893
ENSP00000414187	CPEB1	1893
ENSP00000330237	CASP9	1892
ENSP00000044462	PSMA4	1892
ENSP00000354673	CNOT4	1892
ENSP00000303279	IARS2	1891
ENSP00000362900	SRSF4	1891
ENSP00000301740	SRRM2	1891
ENSP00000322788	MMP1	1890
ENSP00000258428	REV1	1890
ENSP00000377865	RPL23	1889
ENSP00000343488	EARS2	1889
ENSP00000385269	ELAVL1	1886
ENSP00000338703	UGP2	1885
ENSP00000340176	RBPMS	1884
ENSP00000262056	EIF4B	1884
ENSP00000387911	PARN	1883
ENSP00000364794	IARS	1882
ENSP00000258123	USP15	1880
ENSP00000304697	UBB	1874
ENSP00000368318	PUSL1	1874
ENSP00000299855	MMP3	1872
ENSP00000266735	SNRPF	1872
ENSP00000322570	POLE	1870
ENSP00000337733	KLK5	1867
ENSP00000344742	STAMBP	1859
ENSP00000218104	ABCD1	1848
ENSP00000008527	CRY1	1836
ENSP00000234347	PRTN3	1792
ENSP00000253363	RBM39	1791
ENSP00000410926	LMLN	1755
ENSP00000219313	PSMD7	1737
ENSP00000418734	MYSM1	1731
ENSP00000324124	POLR2L	1714
ENSP00000290575	C1R	1624
ENSP00000358812	PDCD11	1617
ENSP00000242839	ATP7B	1590
ENSP00000261712	PSMD11	1574
ENSP00000263621	ELANE	1432
ENSP00000348170	HP	1389
ENSP00000360621	ORC1	1379
ENSP00000377892	SRSF5	1373
ENSP00000216714	APEX1	1335
ENSP00000225426	PSMB3	1311
ENSP00000264690	KLKB1	1290
ENSP00000299543	CTDP1	1259
ENSP00000364660	C2	1197
ENSP00000359988	SRSF11	1155
ENSP00000362334	PSMB2	955
ENSP00000392423	RELN	923
ENSP00000229390	SRSF9	790
ENSP00000359939	EXOSC1	673
ENSP00000414321	RPS24	667
ENSP00000272102	ARF1	574
ENSP00000279247	CAPN1	565
ENSP00000342952	ADCY2	532
ENSP00000358106	PREP	528
ENSP00000366607	SF1	487
ENSP00000261424	RFC1	380
ENSP00000216455	PSMA3	359
ENSP00000295731	IHH	358
ENSP00000233025	SPCS1	340
ENSP00000209668	ADH1A	310
ENSP00000334962	TMPRSS6	263
ENSP00000298852	PSMC3	262
ENSP00000323046	EXOSC3	253
ENSP00000261600	THOC1	240
ENSP00000271628	SF3B4	215
ENSP00000351409	CELF1	211
ENSP00000412310	SKIV2L	198
ENSP00000324122	PRPF31	183
ENSP00000336741	DHX15	161
ENSP00000291552	U2AF1	161
ENSP00000322016	PUF60	157
ENSP00000369218	RBM17	145
ENSP00000301788	POLR2G	145
ENSP00000264211	EIF4G3	135
ENSP00000296581	LSM6	134
ENSP00000218099	F9	132
ENSP00000385057	APOBEC3G	129
ENSP00000221233	EXOSC5	106
ENSP00000384573	DAZ1	78
ENSP00000382819	DOM3Z	78
ENSP00000284811	TCEB1	56
ENSP00000372860	VARSL	54
ENSP00000276072	TAF1	52
ENSP00000215587	POLR2E	51
ENSP00000360248	ENTPD1	50
ENSP00000326806	NCBP2	50
ENSP00000351717	ABCB8	49
ENSP00000358421	HSD3B1	47
ENSP00000375809	ERCC2	47
ENSP00000261303	PSMC1	45
ENSP00000299424	TAF10	37
ENSP00000215057	MZF1	36
ENSP00000342812	USP9Y	35
ENSP00000298746	TRUB1	33
ENSP00000386541	PSMD14	32
ENSP00000364731	F7	30
ENSP00000272645	POLR2D	30
ENSP00000309830	RPL38	30
ENSP00000350199	AP1B1	24
ENSP00000367721	NUP160	24
ENSP00000256216	HSD17B4	22
ENSP00000286355	ADCY8	22
ENSP00000366410	NMNAT1	21
ENSP00000247170	DAAM1	19
ENSP00000257934	ESPL1	19
ENSP00000272190	REN	18
ENSP00000359478	ABCC2	18
ENSP00000345728	ATP7A	17
ENSP00000383690	MASP2	17
ENSP00000342889	POLR2K	17
ENSP00000262519	SETD1A	16
ENSP00000349595	ATP2A1	16
ENSP00000365397	DHRS3	16
ENSP00000345344	CTSL1	15
ENSP00000265316	ABCB6	15
ENSP00000337816	MMP25	14
ENSP00000345096	IMPDH1	14
ENSP00000295598	ATP1A1	14
ENSP00000269143	AFG3L2	14
ENSP00000265986	IDE	13
ENSP00000355086	DARS2	13
ENSP00000362116	PGC	12
ENSP00000267502	RDH12	12
ENSP00000297431	ORC5	11
ENSP00000364412	HSD17B3	11
ENSP00000339399	CRYZ	10
ENSP00000290122	CELA3A	10
ENSP00000359910	PSMA7	9
ENSP00000229214	KRR1	9
ENSP00000215956	NHP2L1	9
ENSP00000342300	TH1L	9
ENSP00000310040	EIF3F	9
ENSP00000257347	CARS2	8
ENSP00000354633	TAF11	8
ENSP00000231751	LTF	8
ENSP00000254940	NIP7	7
ENSP00000349168	HNRNPH1	7
ENSP00000263657	PNO1	6
ENSP00000403852	POLR2F	6
ENSP00000354951	QKI	6
ENSP00000262442	DNAH9	6
ENSP00000307567	QARS	6
ENSP00000296577	ABCE1	6
ENSP00000382392	NOP2	6
ENSP00000219069	ZNF263	6
ENSP00000373674	NT5M	6
ENSP00000253496	F12	6
ENSP00000312735	POLR2B	5
ENSP00000406878	PSMB8	5
ENSP00000349396	ABCD4	5
ENSP00000175238	ADAM7	5
ENSP00000222388	ABCF2	5
ENSP00000261200	ABCC9	5
ENSP00000225929	HSD17B1	5
ENSP00000349156	SIAH1	5
ENSP00000406157	PAPSS2	5
ENSP00000328023	SRPR	4
ENSP00000221801	FBL	4
ENSP00000312769	PPIE	4
ENSP00000338369	CELA3B	4
ENSP00000011292	CPA1	4
ENSP00000281317	MMAA	4
ENSP00000216727	PABPN1	4
ENSP00000278279	TUT1	4
ENSP00000353701	DPP3	3
ENSP00000320309	FARSA	3
ENSP00000240285	RDH10	3
ENSP00000412553	ABCF1	3
ENSP00000353767	MMP17	3
ENSP00000372853	C2	3
ENSP00000292644	PSMC2	3
ENSP00000312066	SRP68	3
ENSP00000254231	LIN28A	3
ENSP00000382373	DAZL	3
ENSP00000250113	FXR2	3
ENSP00000381206	RDH16	3
ENSP00000349594	ELAVL4	3
ENSP00000366557	CRNKL1	3
ENSP00000355637	ABCB10	2
ENSP00000331327	WT1	2
ENSP00000217958	PSMD10	2
ENSP00000309262	USP48	2
ENSP00000396937	PSMD13	2
ENSP00000007264	RPUSD1	2
ENSP00000342011	XRCC4	2
ENSP00000226279	CD38	2
ENSP00000408956	DHX16	2
ENSP00000413035	RBFOX2	2
ENSP00000311746	KLK10	2
ENSP00000365837	PUS1	2
ENSP00000247470	PYCARD	2
ENSP00000222481	CPA2	2
ENSP00000268854	DDX52	2
ENSP00000264639	PSMD3	2
ENSP00000308208	MMP14	2
ENSP00000388001	OAS1	2
ENSP00000353679	MME	2
ENSP00000380969	THOC5	2
ENSP00000348108	KHDRBS3	1
ENSP00000199320	DIMT1	1
ENSP00000420821	RPL41	1
ENSP00000302310	ZNF396	1
ENSP00000412788	PTBP2	1
ENSP00000309092	GMPPB	1
ENSP00000408295	RFC5	1
ENSP00000264689	UFSP2	1
ENSP00000348308	MMP23B	1
ENSP00000188790	FAP	1
ENSP00000301825	ENTPD3	1
ENSP00000268379	UQCRC2	1
ENSP00000263702	MECR	1
ENSP00000250066	USP6	1
ENSP00000413950	HSD17B8	1
ENSP00000327386	PRSS57	1
ENSP00000329738	ZSCAN30	1
ENSP00000257765	KHDC1	1
ENSP00000328690	DDX24	1
ENSP00000297767	PRSS37	1
ENSP00000358497	RNGTT	1
ENSP00000320658	YARS2	1
ENSP00000258772	DDX56	1
ENSP00000381216	KHSRP	1
ENSP00000252813	PGPEP1	1
ENSP00000356411	TROVE2	1
ENSP00000231887	EHHADH	1
ENSP00000375844	CAPN10	1
ENSP00000394802	VARS2	1
ENSP00000368253	NR0B1	1
ENSP00000361949	PABPC4	1
ENSP00000293502	SDR9C7	1
ENSP00000296522	HPGD	0
ENSP00000278070	PPRC1	0
ENSP00000288709	MMEL1	0
ENSP00000277903	HABP2	0
ENSP00000297679	HSD3B7	0
ENSP00000277865	GLUD1	0
ENSP00000293842	RPL26	0
ENSP00000277165	FAM120A	0
ENSP00000278200	IMMP1L	0
ENSP00000297540	PHAX	0
ENSP00000298480	KCNT1	0
ENSP00000290583	CELF3	0
ENSP00000290810	NAE1	0
ENSP00000303015	ZRSR2	0
ENSP00000303129	VAT1L	0
ENSP00000303208	PCSK9	0
ENSP00000278412	SSRP1	0
ENSP00000295640	RNPEP	0
ENSP00000302886	PA2G4	0
ENSP00000294053	CLPB	0
ENSP00000297990	NOL6	0
ENSP00000296498	PRSS12	0
ENSP00000278360	PAMR1	0
ENSP00000297979	C9orf3	0
ENSP00000293851	PRSS33	0
ENSP00000298173	GTF2A1	0
ENSP00000278353	HSD17B12	0
ENSP00000290341	IGF2BP1	0
ENSP00000302805	DDI1	0
ENSP00000297770	CPA6	0
ENSP00000289865	USP21	0
ENSP00000302485	CSDC2	0
ENSP00000298317	RPUSD4	0
ENSP00000289248	RHBDL2	0
ENSP00000296015	TTC14	0
ENSP00000290216	SCRN2	0
ENSP00000295624	NAV1	0
ENSP00000296513	ADAD1	0
ENSP00000278319	ZNF215	0
ENSP00000292672	CELF5	0
ENSP00000303511	PEX6	0
ENSP00000273859	ATP10D	0
ENSP00000297183	ANKHD1	0
ENSP00000273857	CORIN	0
ENSP00000273359	ABHD10	0
ENSP00000273320	ZNF167	0
ENSP00000273283	ITIH1	0
ENSP00000273075	DNPEP	0
ENSP00000297071	TRA2A	0
ENSP00000295971	RBM47	0
ENSP00000272895	ABCA12	0
ENSP00000292123	SAFB	0
ENSP00000272852	CPO	0
ENSP00000303712	RBMY1A1	0
ENSP00000295901	PSMD6	0
ENSP00000296674	RPS23	0
ENSP00000272732	SCRN3	0
ENSP00000292823	PCYT1A	0
ENSP00000292879	U2AF1L4	0
ENSP00000293273	RDM1	0
ENSP00000293362	PSME3	0
ENSP00000292476	CPSF4	0
ENSP00000295899	THOC7	0
ENSP00000302397	ATP1A3	0
ENSP00000303356	DCXR	0
ENSP00000288111	DHRS1	0
ENSP00000303434	USP38	0
ENSP00000290866	ACE	0
ENSP00000290921	CTBP1	0
ENSP00000275820	NOM1	0
ENSP00000274849	ABT1	0
ENSP00000274680	FARS2	0
ENSP00000274008	SPATA5	0
ENSP00000295822	EIF5A2	0
ENSP00000274054	NAF1	0
ENSP00000274487	ADAMTS19	0
ENSP00000291532	TMPRSS3	0
ENSP00000274400	GTF2H2	0
ENSP00000291688	MCM3AP	0
ENSP00000274306	GZMA	0
ENSP00000274242	RPL37	0
ENSP00000291892	RDH13	0
ENSP00000274181	ADAMTS16	0
ENSP00000297229	USP49	0
ENSP00000276079	NONO	0
ENSP00000293636	CELA1	0
ENSP00000295119	NUP35	0
ENSP00000302393	LDHAL6B	0
ENSP00000299767	HSP90B1	0
ENSP00000296273	RFC4	0
ENSP00000300456	SLC27A4	0
ENSP00000282276	MARS2	0
ENSP00000285238	ABCC3	0
ENSP00000299714	SEC11C	0
ENSP00000296257	SENP2	0
ENSP00000281722	RBM46	0
ENSP00000285199	USP43	0
ENSP00000281589	PABPC3	0
ENSP00000282344	USP12	0
ENSP00000299427	TPP1	0
ENSP00000281474	BICD1	0
ENSP00000292450	ZSCAN21	0
ENSP00000296424	BDH2	0
ENSP00000295937	DNAH12	0
ENSP00000294753	ZNF496	0
ENSP00000299367	C2	0
ENSP00000300762	MMP26	0
ENSP00000285679	USP25	0
ENSP00000299213	LARP6	0
ENSP00000281701	NVL	0
ENSP00000284425	ABCA6	0
ENSP00000293371	DCD	0
ENSP00000300146	PATL1	0
ENSP00000283628	UBP1	0
ENSP00000283916	TMPRSS11D	0
ENSP00000283558	ATP11A	0
ENSP00000300069	RBPMS2	0
ENSP00000283429	NMRAL1	0
ENSP00000299882	TMPRSS5	0
ENSP00000284073	MSI2	0
ENSP00000282326	ZSCAN1	0
ENSP00000282957	CPB1	0
ENSP00000300954	PCSK4	0
ENSP00000284440	UCHL1	0
ENSP00000282849	ADAMTS18	0
ENSP00000296280	MASP1	0
ENSP00000284509	ATP8B4	0
ENSP00000282486	MBNL1	0
ENSP00000296411	METAP1	0
ENSP00000284885	TMPRSS15	0
ENSP00000282388	ZFP36L2	0
ENSP00000294904	RBMS1	0
ENSP00000284987	ADAMTS5	0
ENSP00000283027	NUBP1	0
ENSP00000287202	CELF6	0
ENSP00000280560	ABCB9	0
ENSP00000280258	PRSS23	0
ENSP00000280154	PDCD4	0
ENSP00000302051	ECEL1	0
ENSP00000286760	WHAMM	0
ENSP00000286835	SCAF4	0
ENSP00000294702	GFI1	0
ENSP00000279441	MMP10	0
ENSP00000279259	FAU	0
ENSP00000285737	LONP2	0
ENSP00000287078	TYSND1	0
ENSP00000295470	HNRPDL	0
ENSP00000298717	METTL3	0
ENSP00000302239	USP8	0
ENSP00000287394	ATAD2	0
ENSP00000287713	NMNAT2	0
ENSP00000278742	ST14	0
ENSP00000287908	STEAP2	0
ENSP00000288071	DDX19B	0
ENSP00000296046	CPA3	0
ENSP00000288666	RPS4Y2	0
ENSP00000300145	XRCC6BP1	0
ENSP00000294189	RPL29	0
ENSP00000286614	MMP16	0
ENSP00000278559	CAPN5	0
ENSP00000281038	NARS2	0
ENSP00000285814	MKI67IP	0
ENSP00000285968	NUP205	0
ENSP00000296456	APEH	0
ENSP00000286070	RBM45	0
ENSP00000301420	KLK1	0
ENSP00000286186	CASP10	0
ENSP00000301732	ABCA3	0
ENSP00000296137	FYCO1	0
ENSP00000286744	ADAMTSL3	0
ENSP00000280706	LDHAL6A	0
ENSP00000298861	AGBL2	0
ENSP00000299206	POLL	0
ENSP00000299164	ADAMTS15	0
ENSP00000286627	KCNMA1	0
ENSP00000280704	LDHC	0
ENSP00000286657	ADAMTS3	0
ENSP00000280606	PRSS53	0
ENSP00000298999	R3HCC1L	0
ENSP00000298875	CPSF2	0
ENSP00000301962	USP42	0
ENSP00000300896	USP32	0
ENSP00000301765	VPS37C	0
ENSP00000240185	TARDBP	0
ENSP00000236671	CTSD	0
ENSP00000236826	MMP8	0
ENSP00000237289	TNFAIP3	0
ENSP00000237612	ABCG2	0
ENSP00000238146	DDX55	0
ENSP00000238341	CNTRL	0
ENSP00000238497	VPS4B	0
ENSP00000238688	SLIRP	0
ENSP00000244571	AARS2	0
ENSP00000238789	ATAD2B	0
ENSP00000234798	TPSG1	0
ENSP00000241305	CPXM2	0
ENSP00000242210	NT5C3	0
ENSP00000242248	POLM	0
ENSP00000242351	ZC3HAV1	0
ENSP00000243346	NMI	0
ENSP00000244020	SRSF6	0
ENSP00000244051	MOCS3	0
ENSP00000244137	PEPD	0
ENSP00000263278	HSD17B14	0
ENSP00000238714	PAPOLG	0
ENSP00000231368	LNPEP	0
ENSP00000228955	GTF2H3	0
ENSP00000229003	ENDOU	0
ENSP00000229330	HCFC2	0
ENSP00000229395	FGFR1OP2	0
ENSP00000230050	RPS12	0
ENSP00000230236	HSD17B8	0
ENSP00000230582	PRSS16	0
ENSP00000230588	MEP1A	0
ENSP00000230771	HARS2	0
ENSP00000235628	NT5C1A	0
ENSP00000231009	GZMK	0
ENSP00000235521	WARS2	0
ENSP00000231948	CRBN	0
ENSP00000232888	RRP9	0
ENSP00000233078	DAZAP1	0
ENSP00000233084	DDX1	0
ENSP00000233114	MDH1	0
ENSP00000233468	AC008073.5	0
ENSP00000233997	AZU1	0
ENSP00000234677	SARS	0
ENSP00000244669	APOBEC2	0
ENSP00000230859	PAPD7	0
ENSP00000252595	SLC27A1	0
ENSP00000251607	TRNT1	0
ENSP00000252115	POLDIP3	0
ENSP00000252136	TRMT2A	0
ENSP00000252207	ZNF193	0
ENSP00000252211	ZKSCAN3	0
ENSP00000252455	PRKCSH	0
ENSP00000252463	ZSCAN10	0
ENSP00000252519	ACE2	0
ENSP00000244533	ABCC10	0
ENSP00000252543	RPL36	0
ENSP00000251074	NUP37	0
ENSP00000252996	TAF4	0
ENSP00000253108	EIF3G	0
ENSP00000253329	PPIL4	0
ENSP00000253577	ABCB7	0
ENSP00000253693	CAPN7	0
ENSP00000253719	NAPSA	0
ENSP00000253788	RPL27	0
ENSP00000254181	USP29	0
ENSP00000254193	SNRPA1	0
ENSP00000252542	SAFB2	0
ENSP00000248633	PEX1	0
ENSP00000244769	ATXN1	0
ENSP00000245121	KATNAL2	0
ENSP00000245441	NIN	0
ENSP00000245544	NUP85	0
ENSP00000246071	SNRPB2	0
ENSP00000246117	NCLN	0
ENSP00000246186	MMP24	0
ENSP00000246194	RALY	0
ENSP00000247001	SUGP1	0
ENSP00000251582	ADAMTS2	0
ENSP00000248566	SHFM1	0
ENSP00000251312	DHRS11	0
ENSP00000249269	PMPCB	0
ENSP00000250076	ZNF232	0
ENSP00000250156	MRM1	0
ENSP00000250244	AP1M2	0
ENSP00000250351	KLK12	0
ENSP00000250366	KLK9	0
ENSP00000251038	ZC3H14	0
ENSP00000251071	CAPRIN2	0
ENSP00000228827	GPN3	0
ENSP00000247003	DDX49	0
ENSP00000216024	DMC1	0
ENSP00000205557	ABCC6	0
ENSP00000206542	OSGEP	0
ENSP00000209665	ADH7	0
ENSP00000209873	AAAS	0
ENSP00000211076	TPSD1	0
ENSP00000211372	RPS18	0
ENSP00000211402	VARS	0
ENSP00000215071	PSMD8	0
ENSP00000228928	OAS3	0
ENSP00000215793	SF3A1	0
ENSP00000200652	SLC22A4	0
ENSP00000216039	JOSD1	0
ENSP00000216139	ACR	0
ENSP00000216181	MYH9	0
ENSP00000216277	PAPOLA	0
ENSP00000216336	CTSG	0
ENSP00000216338	GZMH	0
ENSP00000216500	DHRS7	0
ENSP00000216802	PSME2	0
ENSP00000217073	PABPC1L	0
ENSP00000215743	MMP11	0
ENSP00000161006	PRSS22	0
ENSP00000005995	PRSS21	0
ENSP00000012049	QPCTL	0
ENSP00000028008	RNASET2	0
ENSP00000040877	TARBP1	0
ENSP00000055077	RFC2	0
ENSP00000061240	TLL1	0
ENSP00000072644	YIPF1	0
ENSP00000084795	RPL18	0
ENSP00000156476	KLK13	0
ENSP00000203664	OTUB2	0
ENSP00000157812	PSMC4	0
ENSP00000203407	UQCRC1	0
ENSP00000166345	TRIP13	0
ENSP00000181383	CPB2	0
ENSP00000182377	FAR2	0
ENSP00000196169	TDRD3	0
ENSP00000198939	CHERP	0
ENSP00000199814	RBM22	0
ENSP00000199936	HSD17B2	0
ENSP00000200557	ADAM11	0
ENSP00000217964	TBL1X	0
ENSP00000156499	KLK14	0
ENSP00000225696	NUP88	0
ENSP00000217131	CTSZ	0
ENSP00000222247	RPL18A	0
ENSP00000222390	HGF	0
ENSP00000222482	CPA4	0
ENSP00000223051	TFR2	0
ENSP00000223061	PCOLCE	0
ENSP00000223073	RBM28	0
ENSP00000223357	AEBP1	0
ENSP00000224600	RBP3	0
ENSP00000221770	POP4	0
ENSP00000225430	RPL19	0
ENSP00000221740	CASP14	0
ENSP00000225719	CPD	0
ENSP00000225831	CCL2	0
ENSP00000225842	CCL1	0
ENSP00000226207	MYH1	0
ENSP00000227266	CTSC	0
ENSP00000227474	PUS3	0
ENSP00000228476	DAO	0
ENSP00000228740	LTA4H	0
ENSP00000254521	HSD17B7	0
ENSP00000225388	NUFIP2	0
ENSP00000219611	SOLH	0
ENSP00000228843	RAD51AP1	0
ENSP00000218032	TLR8	0
ENSP00000218348	USP11	0
ENSP00000218364	HTATSF1	0
ENSP00000219271	MMP15	0
ENSP00000219439	HSDL1	0
ENSP00000219473	USP10	0
ENSP00000219478	ZNF500	0
ENSP00000219481	DECR2	0
ENSP00000221859	POLR2I	0
ENSP00000219599	CRYM	0
ENSP00000217893	TAF9	0
ENSP00000219689	USP31	0
ENSP00000220166	CTSH	0
ENSP00000220496	DNAJC17	0
ENSP00000220763	CPQ	0
ENSP00000220772	SFRP1	0
ENSP00000220959	UBR5	0
ENSP00000220966	PYCRL	0
ENSP00000221403	DHDH	0
ENSP00000221431	FBXO17	0
ENSP00000219551	RHBDL1	0
ENSP00000265322	PECR	0
ENSP00000265069	ZFR	0
ENSP00000265085	CPEB4	0
ENSP00000265097	THOC3	0
ENSP00000265100	RPL26L1	0
ENSP00000265104	DNAH5	0
ENSP00000265112	TARS	0
ENSP00000265162	ENPEP	0
ENSP00000265164	CASP6	0
ENSP00000263270	AP2S1	0
ENSP00000265271	RBM27	0
ENSP00000264883	NUP54	0
ENSP00000265348	CUL7	0
ENSP00000265351	XPO5	0
ENSP00000265394	CPVL	0
ENSP00000265537	LARS2	0
ENSP00000265651	FBXO3	0
ENSP00000265707	ADAM18	0
ENSP00000265708	ADAM2	0
ENSP00000265723	ABCB4	0
ENSP00000265724	ABCB1	0
ENSP00000265174	PAPSS1	0
ENSP00000264161	DARS	0
ENSP00000254235	ADCY7	0
ENSP00000263368	BLVRB	0
ENSP00000263519	ATP2B3	0
ENSP00000263576	DDX25	0
ENSP00000263598	LCN1	0
ENSP00000263672	SPCS2	0
ENSP00000263736	SRBD1	0
ENSP00000263966	USP13	0
ENSP00000264018	DDX6	0
ENSP00000265016	BST1	0
ENSP00000264157	CCNT2	0
ENSP00000264995	MRPL3	0
ENSP00000264169	ORC4	0
ENSP00000264377	ADAM23	0
ENSP00000264424	GUCY1B3	0
ENSP00000264447	ZNF638	0
ENSP00000264451	SLC30A9	0
ENSP00000264553	GZMM	0
ENSP00000264645	CASC3	0
ENSP00000264691	F11	0
ENSP00000265769	ADAM28	0
ENSP00000264151	OSGEPL1	0
ENSP00000270625	RPS11	0
ENSP00000265732	RBM48	0
ENSP00000269051	RHBDL3	0
ENSP00000269080	ABCA8	0
ENSP00000269081	ABCA10	0
ENSP00000269142	TAF4B	0
ENSP00000269202	MEP1B	0
ENSP00000269534	NT5C3L	0
ENSP00000270225	SAE1	0
ENSP00000270328	ADAMTS10	0
ENSP00000268793	DPEP3	0
ENSP00000270586	PSMB6	0
ENSP00000268704	SPG7	0
ENSP00000271064	TINAGL1	0
ENSP00000271308	PSMA5	0
ENSP00000271643	ADAMTSL4	0
ENSP00000271651	CTSK	0
ENSP00000271764	EIF2D	0
ENSP00000271971	CAPN9	0
ENSP00000272317	RPS27A	0
ENSP00000272348	SNRPG	0
ENSP00000272418	MRPS5	0
ENSP00000270357	RNPEPL1	0
ENSP00000267229	RBM26	0
ENSP00000318602	PRTFDC1	0
ENSP00000265806	R3HCC1	0
ENSP00000265866	HNRNPH3	0
ENSP00000265997	CPEB3	0
ENSP00000266022	RBM6	0
ENSP00000266529	ZCRB1	0
ENSP00000266542	C1RL	0
ENSP00000266544	NDUFA9	0
ENSP00000266991	DHH	0
ENSP00000268797	GFOD2	0
ENSP00000267202	VPS37B	0
ENSP00000265753	EIF4H	0
ENSP00000267287	MBNL2	0
ENSP00000267422	NOVA1	0
ENSP00000267499	ADAM21	0
ENSP00000267568	PTGR2	0
ENSP00000268070	ADAMTS17	0
ENSP00000268281	PRSS36	0
ENSP00000268605	NOL3	0
ENSP00000268655	ZNF174	0
ENSP00000268661	RPL3L	0
ENSP00000267197	SETD1B	0
ENSP00000259470	CTSL2	0
ENSP00000258416	EIF4E2	0
ENSP00000258729	IGF2BP3	0
ENSP00000258738	ABCB5	0
ENSP00000258742	NUPL2	0
ENSP00000258884	FAM108C1	0
ENSP00000258886	IREB2	0
ENSP00000258947	CALCOCO2	0
ENSP00000258960	NMT1	0
ENSP00000303766	HTRA3	0
ENSP00000259339	TOR1B	0
ENSP00000258169	MPHOSPH6	0
ENSP00000259782	TINAG	0
ENSP00000259883	PGBD1	0
ENSP00000259895	GTF2H4	0
ENSP00000259997	CPEB2	0
ENSP00000260184	DDX60L	0
ENSP00000260187	USP2	0
ENSP00000260227	MMP7	0
ENSP00000260229	MMP27	0
ENSP00000260408	ADAM10	0
ENSP00000259119	SKIL	0
ENSP00000256999	FOLH1	0
ENSP00000272444	DUSP11	0
ENSP00000254799	GRSF1	0
ENSP00000254928	ERAL1	0
ENSP00000255078	IGHMBP2	0
ENSP00000255381	MYH4	0
ENSP00000256031	ATP13A3	0
ENSP00000256389	ADAM20	0
ENSP00000256412	ADAMDEC1	0
ENSP00000256644	HBXIP	0
ENSP00000258399	USP37	0
ENSP00000256935	DOCK2	0
ENSP00000258383	MRPL44	0
ENSP00000257177	ZCCHC11	0
ENSP00000257359	ADAMTS8	0
ENSP00000257527	ADAM19	0
ENSP00000257548	USP30	0
ENSP00000257552	MSI1	0
ENSP00000257570	OASL	0
ENSP00000257622	POM121	0
ENSP00000257895	RDH5	0
ENSP00000260648	PREPL	0
ENSP00000256854	NARS	0
ENSP00000262794	MOV10L1	0
ENSP00000260619	THUMPD2	0
ENSP00000262302	NUBP2	0
ENSP00000262316	RHBDF1	0
ENSP00000262415	DHX8	0
ENSP00000262429	ATP2C2	0
ENSP00000262462	SLC27A6	0
ENSP00000262545	PCSK2	0
ENSP00000262623	ATP4A	0
ENSP00000262633	RBM42	0
ENSP00000262031	RBMS2	0
ENSP00000262715	TEP1	0
ENSP00000261973	RBM25	0
ENSP00000262809	ELL	0
ENSP00000262873	MYH7B	0
ENSP00000262960	DPP9	0
ENSP00000262966	MPND	0
ENSP00000263032	NXF5	0
ENSP00000263063	MTPAP	0
ENSP00000263239	DDX18	0
ENSP00000263256	DESI1	0
ENSP00000263257	NOVA2	0
ENSP00000262710	ACIN1	0
ENSP00000261592	NOL4	0
ENSP00000254508	NUP210	0
ENSP00000260665	LRPPRC	0
ENSP00000260956	SSB	0
ENSP00000261173	ATP2B1	0
ENSP00000261245	MNAT1	0
ENSP00000261296	TGDS	0
ENSP00000261332	ZNF24	0
ENSP00000261383	DNAH3	0
ENSP00000261465	HSD11B1	0
ENSP00000262288	SCPEP1	0
ENSP00000261488	ENOX1	0
ENSP00000260645	ABCG5	0
ENSP00000261601	USP14	0
ENSP00000261615	DPEP1	0
ENSP00000261674	SFSWAP	0
ENSP00000261714	BLMH	0
ENSP00000261741	RBM19	0
ENSP00000261817	PSMD9	0
ENSP00000261862	THSD4	0
ENSP00000261879	APH1B	0
ENSP00000261951	CNOT6	0
ENSP00000261479	PSMA6	0
ENSP00000368612	KIAA0564	0
ENSP00000367992	ESD	0
ENSP00000368030	ATAD3A	0
ENSP00000368062	ATAD3C	0
ENSP00000368173	DHRS13	0
ENSP00000368174	MCM8	0
ENSP00000368199	PGPEP1L	0
ENSP00000368341	RBM24	0
ENSP00000368349	POLA1	0
ENSP00000368439	PCYT1B	0
ENSP00000318480	YME1L1	0
ENSP00000368589	GFOD1	0
ENSP00000367498	LRRC47	0
ENSP00000368667	DDX53	0
ENSP00000368754	BAZ2A	0
ENSP00000368881	KIN	0
ENSP00000368984	EXOSC9	0
ENSP00000369238	ADAM32	0
ENSP00000369411	RFC3	0
ENSP00000369419	STEAP4	0
ENSP00000369456	ITPA	0
ENSP00000369460	ELAVL2	0
ENSP00000369699	TMEM27	0
ENSP00000368459	NUFIP1	0
ENSP00000366509	ZKSCAN4	0
ENSP00000365116	CTRC	0
ENSP00000365233	TPP2	0
ENSP00000365370	HNRNPCL1	0
ENSP00000365504	GTF2H4	0
ENSP00000365625	DHX16	0
ENSP00000365694	PPP1R10	0
ENSP00000365840	ENTPD6	0
ENSP00000365943	PCSK5	0
ENSP00000365944	FBXO6	0
ENSP00000365946	RBM3	0
ENSP00000367797	SKI	0
ENSP00000366249	UBD	0
ENSP00000367609	PABPN1L	0
ENSP00000366519	NSUN6	0
ENSP00000366527	ZSCAN16	0
ENSP00000366819	UCHL3	0
ENSP00000366829	RBM10	0
ENSP00000366934	NOL9	0
ENSP00000366997	DIS3	0
ENSP00000367001	DPP6	0
ENSP00000367030	TRDMT1	0
ENSP00000367407	NMT2	0
ENSP00000369921	ADAMTSL1	0
ENSP00000366240	FAM108B1	0
ENSP00000373039	UBD	0
ENSP00000369887	SLTM	0
ENSP00000372224	HGFAC	0
ENSP00000372335	WHSC2	0
ENSP00000372459	CTIF	0
ENSP00000372484	RBMY1B	0
ENSP00000372595	PSMB9	0
ENSP00000372599	TAP2	0
ENSP00000372721	PSMB9	0
ENSP00000372722	TAP1	0
ENSP00000372723	PSMB8	0
ENSP00000371802	DAZ3	0
ENSP00000372827	SKIV2L	0
ENSP00000371742	DAZ4	0
ENSP00000373071	DHX16	0
ENSP00000373082	ABCF1	0
ENSP00000373277	RBMS3	0
ENSP00000373331	RPUSD3	0
ENSP00000373472	ADAMTS7	0
ENSP00000373654	SKOR1	0
ENSP00000373657	C17orf85	0
ENSP00000373825	DNAH2	0
ENSP00000374045	DNAH6	0
ENSP00000374071	ADAMTS20	0
ENSP00000372726	TAP2	0
ENSP00000370713	ADARB2	0
ENSP00000364912	SPEN	0
ENSP00000369979	CPXM1	0
ENSP00000369989	KATNAL1	0
ENSP00000369996	ATXN3L	0
ENSP00000370109	PSIP1	0
ENSP00000370150	WRNIP1	0
ENSP00000370151	RAD17	0
ENSP00000370372	NLN	0
ENSP00000370377	PITRM1	0
ENSP00000370443	ADAMTS6	0
ENSP00000371870	DAZ2	0
ENSP00000370648	RDH14	0
ENSP00000369897	CARS	0
ENSP00000370750	RDH11	0
ENSP00000370808	SLC25A6	0
ENSP00000370930	MRPL23	0
ENSP00000370966	CRYZL1	0
ENSP00000371070	ATP8A2	0
ENSP00000371084	ATP8A1	0
ENSP00000371155	NUPL1	0
ENSP00000371372	ATP12A	0
ENSP00000371607	MIPEP	0
ENSP00000371634	IGF2BP2	0
ENSP00000370532	GTF3A	0
ENSP00000360327	PARS2	0
ENSP00000361076	RPL7A	0
ENSP00000359645	RBMX	0
ENSP00000359688	RPF1	0
ENSP00000359802	ZNF75D	0
ENSP00000359804	FUBP1	0
ENSP00000359848	PIGK	0
ENSP00000359869	USP26	0
ENSP00000360112	RAVER2	0
ENSP00000360147	XPNPEP2	0
ENSP00000360215	ZBP1	0
ENSP00000359446	CPN1	0
ENSP00000360270	OMA1	0
ENSP00000359396	DPPA5	0
ENSP00000360365	MCTS1	0
ENSP00000360561	ENTPD8	0
ENSP00000360635	DPP7	0
ENSP00000360671	SLC25A5	0
ENSP00000360690	LONRF3	0
ENSP00000360782	PMPCA	0
ENSP00000360905	AGBL4	0
ENSP00000360922	STAU1	0
ENSP00000360992	STAMBPL1	0
ENSP00000365075	CELA2B	0
ENSP00000360216	DNTT	0
ENSP00000358605	SMNDC1	0
ENSP00000357980	HTRA1	0
ENSP00000357981	CTSS	0
ENSP00000358059	RTN4IP1	0
ENSP00000358060	TARS2	0
ENSP00000358089	TIAL1	0
ENSP00000358131	OTUD7B	0
ENSP00000358262	CHD1L	0
ENSP00000358400	MDN1	0
ENSP00000358407	ADAM30	0
ENSP00000358417	PHGDH	0
ENSP00000359598	ODF2L	0
ENSP00000358549	RARS2	0
ENSP00000361092	SURF6	0
ENSP00000358635	SYNCRIP	0
ENSP00000358694	XPNPEP1	0
ENSP00000358714	PRSS35	0
ENSP00000358799	RBM15	0
ENSP00000358854	TAF5	0
ENSP00000359049	HENMT1	0
ENSP00000359245	ABCA4	0
ENSP00000359297	NSDHL	0
ENSP00000359361	DDX43	0
ENSP00000359384	OOEP	0
ENSP00000358532	RBM20	0
ENSP00000363993	PSMB9	0
ENSP00000360997	ADAMTS13	0
ENSP00000363018	RPL10A	0
ENSP00000363036	FBXW2	0
ENSP00000363095	TRIM32	0
ENSP00000363250	GPN2	0
ENSP00000363373	PTBP3	0
ENSP00000363400	PAFAH2	0
ENSP00000363516	RCAN3	0
ENSP00000363533	MDH1B	0
ENSP00000363573	BX511012.1	0
ENSP00000362937	RCC1	0
ENSP00000363794	HSD17B8	0
ENSP00000362936	TRNAU1AP	0
ENSP00000364016	PSMB8	0
ENSP00000364028	ECE1	0
ENSP00000364034	TAP2	0
ENSP00000364448	UPF3A	0
ENSP00000364543	SKIV2L	0
ENSP00000364578	RDBP	0
ENSP00000364639	RBM7	0
ENSP00000364815	VARS	0
ENSP00000364883	AUH	0
ENSP00000375682	KLK8	0
ENSP00000363745	HNRNPR	0
ENSP00000361927	HNRNPH2	0
ENSP00000361097	MMRN2	0
ENSP00000361232	DDX31	0
ENSP00000361306	ATG4A	0
ENSP00000361454	NCBP2L	0
ENSP00000361557	RBM41	0
ENSP00000361562	CTSA	0
ENSP00000361658	NUP188	0
ENSP00000361686	VDAC2	0
ENSP00000361761	WFDC2	0
ENSP00000361790	ZNF642	0
ENSP00000362993	BICC1	0
ENSP00000361843	NXF2	0
ENSP00000365012	HCK	0
ENSP00000361982	TRUB2	0
ENSP00000362217	DACH2	0
ENSP00000362287	EIF2C3	0
ENSP00000362300	EIF2C1	0
ENSP00000362304	ADAMTS14	0
ENSP00000362381	TOR2A	0
ENSP00000362618	PABPC1L2A	0
ENSP00000362621	PABPC1L2B	0
ENSP00000362687	DDX50	0
ENSP00000362744	RPS4X	0
ENSP00000361835	NXF2B	0
ENSP00000403175	RPS18	0
ENSP00000405800	C2	0
ENSP00000401121	VARS	0
ENSP00000401149	TAP1	0
ENSP00000401328	PRSS48	0
ENSP00000401371	TIA1	0
ENSP00000401701	PRSS42	0
ENSP00000401932	PRSS45	0
ENSP00000402278	C2	0
ENSP00000402316	TAP1	0
ENSP00000402406	PSMB8	0
ENSP00000400880	RP11-1286E23.6	0
ENSP00000403156	GTF2H4	0
ENSP00000400867	VARSL	0
ENSP00000403310	SNRNP35	0
ENSP00000403359	VARS	0
ENSP00000403538	HSD17B8	0
ENSP00000403683	NABP1	0
ENSP00000404375	RPL36A	0
ENSP00000404585	PSMB8	0
ENSP00000404705	NAALADL2	0
ENSP00000405356	TAP1	0
ENSP00000405708	CCDC39	0
ENSP00000392985	HTATIP2	0
ENSP00000402527	SENP6	0
ENSP00000395497	GTF2H4	0
ENSP00000374219	ALKBH8	0
ENSP00000393275	NANOS1	0
ENSP00000393324	EIF4E3	0
ENSP00000393393	RPL35A	0
ENSP00000393744	PSMB9	0
ENSP00000393958	DHX16	0
ENSP00000394085	JMJD6	0
ENSP00000394155	PSMB8	0
ENSP00000394400	SKIV2L	0
ENSP00000394791	SENP1	0
ENSP00000401105	GTF2H4	0
ENSP00000395337	LDHA	0
ENSP00000406488	HSD17B8	0
ENSP00000395574	TCEB3	0
ENSP00000396152	UBD	0
ENSP00000396193	DHX16	0
ENSP00000396251	GTF2H4	0
ENSP00000396995	PAPD5	0
ENSP00000397140	KNTC1	0
ENSP00000397598	KY	0
ENSP00000397872	RPS28	0
ENSP00000399530	SKIV2L	0
ENSP00000400626	SKIV2L	0
ENSP00000395259	SCAND3	0
ENSP00000416959	TRA2B	0
ENSP00000405738	ESRP1	0
ENSP00000414402	DNAH14	0
ENSP00000414750	SKOR2	0
ENSP00000414770	PSMB8	0
ENSP00000414922	USP41	0
ENSP00000415316	VARS	0
ENSP00000415434	USP40	0
ENSP00000415464	LARP4	0
ENSP00000415660	TAP1	0
ENSP00000415822	ATXN1L	0
ENSP00000414302	SRSF12	0
ENSP00000416561	CFB	0
ENSP00000414258	TRIM40	0
ENSP00000417601	FBXL2	0
ENSP00000417748	DDI2	0
ENSP00000418082	RPL37A	0
ENSP00000418735	ADAMTS9	0
ENSP00000418748	ESRP2	0
ENSP00000419361	ADCY5	0
ENSP00000419425	PPIA	0
ENSP00000419539	CTAGE4	0
ENSP00000420195	SRSF10	0
ENSP00000420270	UHMK1	0
ENSP00000416110	RPS18	0
ENSP00000410815	XXbac-BPG116M5.17	0
ENSP00000406751	CRY2	0
ENSP00000407154	HSD11B1L	0
ENSP00000407181	PPP1R10	0
ENSP00000407233	PSMB9	0
ENSP00000407310	PPP1R10	0
ENSP00000407460	SCRN1	0
ENSP00000407810	PSMB9	0
ENSP00000407961	C2	0
ENSP00000408395	RBFOX3	0
ENSP00000409315	RBM18	0
ENSP00000414373	ABCF1	0
ENSP00000410416	UBD	0
ENSP00000392835	C2	0
ENSP00000411096	ABCA13	0
ENSP00000411471	ABCF3	0
ENSP00000412027	PSMB9	0
ENSP00000412253	ZSCAN18	0
ENSP00000412583	RPS18	0
ENSP00000412933	TAP1	0
ENSP00000413080	TAP1	0
ENSP00000413234	AP2A2	0
ENSP00000413319	ABCF1	0
ENSP00000413625	FNBP1	0
ENSP00000409872	ZNF274	0
ENSP00000381293	NSF	0
ENSP00000382779	SEH1L	0
ENSP00000379891	AP1S3	0
ENSP00000380039	ZSCAN12	0
ENSP00000380156	RPL32	0
ENSP00000380414	DEK	0
ENSP00000380495	DDX51	0
ENSP00000380982	KIAA0020	0
ENSP00000381007	NAV3	0
ENSP00000381031	EWSR1	0
ENSP00000381036	ADGB	0
ENSP00000379760	RSL1D1	0
ENSP00000381237	HM13	0
ENSP00000379654	KIAA0430	0
ENSP00000381298	LONRF1	0
ENSP00000381476	TMPRSS12	0
ENSP00000381565	DIAPH1	0
ENSP00000381577	USP34	0
ENSP00000381758	CAPN11	0
ENSP00000381785	HSDL2	0
ENSP00000382239	RBM12B	0
ENSP00000382327	SDR39U1	0
ENSP00000382342	ABCC1	0
ENSP00000393241	RPS18	0
ENSP00000381167	DYNC2H1	0
ENSP00000378160	RPL34	0
ENSP00000357798	MMP21	0
ENSP00000375730	RPL13A	0
ENSP00000376309	HNRNPA3	0
ENSP00000376822	STEAP3	0
ENSP00000376849	CASP5	0
ENSP00000377086	LONRF2	0
ENSP00000377344	DDX60	0
ENSP00000377617	MTHFD2	0
ENSP00000377655	SENP7	0
ENSP00000377954	LARS	0
ENSP00000379888	RPS8	0
ENSP00000378130	CFI	0
ENSP00000382840	DDX3X	0
ENSP00000378359	ADH6	0
ENSP00000378461	PCBP4	0
ENSP00000378504	NXF3	0
ENSP00000378736	CRCP	0
ENSP00000378887	DHRS7B	0
ENSP00000379108	MTHFD2L	0
ENSP00000379144	TNRC6A	0
ENSP00000379372	GTF2A2	0
ENSP00000379394	NAV2	0
ENSP00000379500	UEVLD	0
ENSP00000378090	RAD51D	0
ENSP00000389951	CELF2	0
ENSP00000382770	KCNU1	0
ENSP00000386935	UAP1L1	0
ENSP00000387006	CWC22	0
ENSP00000387019	UXS1	0
ENSP00000387088	HNRPLL	0
ENSP00000387753	HSD17B8	0
ENSP00000388566	CASP4	0
ENSP00000388996	AP1M1	0
ENSP00000389103	RPL23A	0
ENSP00000389465	RP11-110H1.2	0
ENSP00000386717	RPL31	0
ENSP00000389862	DHX16	0
ENSP00000386711	JAKMIP1	0
ENSP00000390673	VARS	0
ENSP00000390849	ABHD5	0
ENSP00000390938	DHX16	0
ENSP00000391123	DOM3Z	0
ENSP00000391349	DOM3Z	0
ENSP00000391432	RNPC3	0
ENSP00000391723	PUM1	0
ENSP00000391774	CPSF6	0
ENSP00000392396	VARS	0
ENSP00000392601	DHX30	0
ENSP00000389607	TRIM40	0
ENSP00000385247	CAPN14	0
ENSP00000383168	PCBP3	0
ENSP00000383301	ZNF74	0
ENSP00000383421	RBM11	0
ENSP00000384160	RBM33	0
ENSP00000384211	PSME4	0
ENSP00000384223	ECE2	0
ENSP00000384259	ATG4B	0
ENSP00000384398	MEX3D	0
ENSP00000384523	NFIA	0
ENSP00000384700	PAPOLB	0
ENSP00000386770	DNAH10	0
ENSP00000385083	KDSR	0
ENSP00000375133	ZRSR1	0
ENSP00000385478	ISPD	0
ENSP00000385610	MEX3C	0
ENSP00000385700	USP24	0
ENSP00000386096	MYO18B	0
ENSP00000386104	CPE	0
ENSP00000386156	WIBG	0
ENSP00000386212	PSMB11	0
ENSP00000386227	MCC	0
ENSP00000386565	DPP10	0
ENSP00000386621	AARSD1	0
ENSP00000384703	DDX11	0
ENSP00000323714	EIF4E1B	0
ENSP00000325548	CNDP2	0
ENSP00000322192	PGA3	0
ENSP00000322234	SYNJ1	0
ENSP00000322376	U2SURP	0
ENSP00000322419	RPLP2	0
ENSP00000322716	GLYR1	0
ENSP00000322775	RHBDF2	0
ENSP00000322872	ZKSCAN5	0
ENSP00000322887	CIRBP	0
ENSP00000323148	ZKSCAN1	0
ENSP00000321963	ZSCAN4	0
ENSP00000323678	ZADH2	0
ENSP00000321711	DIS3L	0
ENSP00000323858	DDX54	0
ENSP00000324172	ATP2B2	0
ENSP00000324203	WRAP53	0
ENSP00000324292	FBF1	0
ENSP00000324392	RNF213	0
ENSP00000324414	KLK11	0
ENSP00000324450	ZSCAN20	0
ENSP00000324827	AKAP17A	0
ENSP00000325123	ZSCAN2	0
ENSP00000316670	DHRS9	0
ENSP00000323288	RPUSD2	0
ENSP00000319730	PRSS8	0
ENSP00000333376	USP45	0
ENSP00000317214	CAPN6	0
ENSP00000317691	RPP25	0
ENSP00000318115	TIMM50	0
ENSP00000318177	FUBP3	0
ENSP00000318415	RBMXL1	0
ENSP00000318585	BACE1	0
ENSP00000318629	VPS37A	0
ENSP00000318646	RPS15A	0
ENSP00000319104	SUPT6H	0
ENSP00000322159	ATG4C	0
ENSP00000319279	MALT1	0
ENSP00000325618	PARP10	0
ENSP00000320083	NAALAD2	0
ENSP00000320324	NPEPPS	0
ENSP00000320416	VPS37D	0
ENSP00000320461	ASCC1	0
ENSP00000320557	CHFR	0
ENSP00000320885	SPAST	0
ENSP00000321179	RBM44	0
ENSP00000321195	ATP11B	0
ENSP00000321334	LPA	0
ENSP00000321449	RRP7A	0
ENSP00000319240	MAGOHB	0
ENSP00000332139	CFD	0
ENSP00000325376	HNRNPM	0
ENSP00000330460	DDX59	0
ENSP00000330475	TMPRSS11B	0
ENSP00000330658	PAPPA	0
ENSP00000330812	SDR42E2	0
ENSP00000330813	BRAP	0
ENSP00000331172	CD8B	0
ENSP00000331577	ZNF397	0
ENSP00000331636	CAPN12	0
ENSP00000331719	PCYT2	0
ENSP00000330330	TMPRSS2	0
ENSP00000332052	PCSK6	0
ENSP00000330264	TMPRSS9	0
ENSP00000332340	DDX28	0
ENSP00000332407	SDR42E1	0
ENSP00000332433	ZSCAN22	0
ENSP00000332444	CSTF2T	0
ENSP00000332576	OSBP2	0
ENSP00000332750	ZNF192	0
ENSP00000332756	ATP11C	0
ENSP00000332979	BACE2	0
ENSP00000333003	PRSS55	0
ENSP00000357920	DDO	0
ENSP00000331907	DHX34	0
ENSP00000327459	APOBEC3B	0
ENSP00000325905	SRSF7	0
ENSP00000325917	PCSK7	0
ENSP00000326003	PUS10	0
ENSP00000326128	LARP4B	0
ENSP00000326159	KLK4	0
ENSP00000326219	DHRS4	0
ENSP00000326531	THOC6	0
ENSP00000326581	PEG3	0
ENSP00000326598	PRSS50	0
ENSP00000326777	MTHFSD	0
ENSP00000330349	DDX41	0
ENSP00000327214	ATP13A2	0
ENSP00000316454	PACS1	0
ENSP00000327704	PSMF1	0
ENSP00000327975	DHRS7C	0
ENSP00000328789	AP1S2	0
ENSP00000328813	KCNH8	0
ENSP00000328858	PYCR1	0
ENSP00000329454	RCAN2	0
ENSP00000329553	IMMP2L	0
ENSP00000329918	MEX3B	0
ENSP00000330031	PIWIL3	0
ENSP00000330098	FBXL6	0
ENSP00000327197	SENP5	0
ENSP00000309166	RBM4	0
ENSP00000310471	RBM4B	0
ENSP00000307939	GCC2	0
ENSP00000308012	PABPC5	0
ENSP00000308024	PCSK1	0
ENSP00000308227	HMGA1	0
ENSP00000308369	LEMD3	0
ENSP00000308540	RP11-1407O15.2	0
ENSP00000308720	PRSS1	0
ENSP00000309031	VCPIP1	0
ENSP00000309124	OLR1	0
ENSP00000307774	ZNF239	0
ENSP00000309163	RCE1	0
ENSP00000307607	SDR16C5	0
ENSP00000309175	EIF1AD	0
ENSP00000309334	RPL15	0
ENSP00000309474	PSMD1	0
ENSP00000309477	ACO1	0
ENSP00000309542	PGA5	0
ENSP00000309558	TAF15	0
ENSP00000309749	APOBEC3F	0
ENSP00000309968	ADAM17	0
ENSP00000310015	ADAT1	0
ENSP00000316950	MYEF2	0
ENSP00000309148	KLK6	0
ENSP00000305919	HTRA4	0
ENSP00000304111	ABCG4	0
ENSP00000304139	RBMXL2	0
ENSP00000304336	PYDC1	0
ENSP00000304414	CXCR6	0
ENSP00000304467	THOP1	0
ENSP00000304500	ATP9B	0
ENSP00000304668	HARS	0
ENSP00000304791	KLK7	0
ENSP00000305230	SRP9	0
ENSP00000305494	SPATA5L1	0
ENSP00000307889	RPL13	0
ENSP00000305714	BMP1	0
ENSP00000310590	USP36	0
ENSP00000305926	OTUD7A	0
ENSP00000306080	RNMTL1	0
ENSP00000306117	DDX19A	0
ENSP00000306390	PRSS27	0
ENSP00000306528	DESI2	0
ENSP00000306565	ISG20	0
ENSP00000307181	FAM103A1	0
ENSP00000307288	MCM7	0
ENSP00000307445	LTB4R	0
ENSP00000307519	TMPRSS11E	0
ENSP00000305682	MRPL39	0
ENSP00000315147	ISYNA1	0
ENSP00000310205	NRIP3	0
ENSP00000313581	KLK2	0
ENSP00000313600	ATP10B	0
ENSP00000313811	USP20	0
ENSP00000313890	RBM15B	0
ENSP00000314029	SENP3	0
ENSP00000314067	PAK2	0
ENSP00000314311	LARP7	0
ENSP00000314348	DDX10	0
ENSP00000314414	AP2B1	0
ENSP00000313350	RNASEH1	0
ENSP00000315017	MRPL1	0
ENSP00000313199	HNRNPD	0
ENSP00000315152	METAP1D	0
ENSP00000315383	ASPRV1	0
ENSP00000315477	CD209	0
ENSP00000315569	DIS3L2	0
ENSP00000315664	ZNF18	0
ENSP00000315925	GMPPA	0
ENSP00000316042	HNRNPA0	0
ENSP00000316092	VARS2	0
ENSP00000316228	CLEC4M	0
ENSP00000316357	USP9X	0
ENSP00000314783	KLK15	0
ENSP00000311747	RBM14	0
ENSP00000310771	GRB7	0
ENSP00000310832	CTSF	0
ENSP00000311030	ABCC12	0
ENSP00000311121	PSMA8	0
ENSP00000311221	ZMAT3	0
ENSP00000311273	DNAH7	0
ENSP00000311300	CTSW	0
ENSP00000311318	ATG4D	0
ENSP00000311336	ATP8B3	0
ENSP00000311572	PTGR1	0
ENSP00000313437	MMP19	0
ENSP00000311679	ZNF483	0
ENSP00000333836	FIGN	0
ENSP00000311766	ATAD3B	0
ENSP00000311825	CTBP2	0
ENSP00000312042	HDLBP	0
ENSP00000312185	ELMO1	0
ENSP00000312455	CFLAR	0
ENSP00000312649	PPARGC1B	0
ENSP00000312664	CASP2	0
ENSP00000312870	MCM9	0
ENSP00000313007	PABPC1	0
ENSP00000313171	ATAD5	0
ENSP00000311677	PPP1R8	0
ENSP00000351484	NAALADL1	0
ENSP00000352668	RBM12	0
ENSP00000350170	FXR1	0
ENSP00000350310	ATP2B4	0
ENSP00000350409	UNC50	0
ENSP00000350541	LVRN	0
ENSP00000350630	TLL2	0
ENSP00000350698	DDX47	0
ENSP00000350911	CTSE	0
ENSP00000350914	BDH1	0
ENSP00000351035	HSD17B11	0
ENSP00000350028	MOV10	0
ENSP00000351416	ANKRD17	0
ENSP00000350009	USP33	0
ENSP00000351682	CNDP1	0
ENSP00000351697	REV3L	0
ENSP00000352162	ELAVL3	0
ENSP00000352177	ADAM29	0
ENSP00000352219	BCS1L	0
ENSP00000352308	DDX42	0
ENSP00000352438	PCBP2	0
ENSP00000352522	ATP6V1H	0
ENSP00000352639	CELA2A	0
ENSP00000347232	BLM	0
ENSP00000351108	HNRNPAB	0
ENSP00000348849	RPS26	0
ENSP00000333300	HSD17B13	0
ENSP00000347549	CPA5	0
ENSP00000347792	SYNJ2	0
ENSP00000347872	VAT1	0
ENSP00000348026	STAU2	0
ENSP00000348107	C1D	0
ENSP00000348168	GTF2E2	0
ENSP00000348395	NPEPL1	0
ENSP00000348538	RBM38	0
ENSP00000348565	UBA5	0
ENSP00000350090	HNRNPA1L2	0
ENSP00000348722	PUS7	0
ENSP00000352678	SUPV3L1	0
ENSP00000348912	ADAM33	0
ENSP00000348965	DYNC1H1	0
ENSP00000348984	SON	0
ENSP00000349017	ABCC11	0
ENSP00000349325	ATP10A	0
ENSP00000349356	FIGNL1	0
ENSP00000349393	LIG4	0
ENSP00000349436	ADAM15	0
ENSP00000349658	XPNPEP3	0
ENSP00000349877	ATP13A1	0
ENSP00000348639	TMPRSS11F	0
ENSP00000357060	ATP1A4	0
ENSP00000352665	ATP2C1	0
ENSP00000355467	SCCPDH	0
ENSP00000355565	RBM34	0
ENSP00000355587	NTPCR	0
ENSP00000355719	PRSS38	0
ENSP00000356104	PM20D1	0
ENSP00000356146	SCAF8	0
ENSP00000356448	TPR	0
ENSP00000356476	TRMT1L	0
ENSP00000356530	RNASEL	0
ENSP00000355315	RPL39	0
ENSP00000356903	UAP1	0
ENSP00000355264	FAM111A	0
ENSP00000357218	APOA1BP	0
ENSP00000357459	ADAR	0
ENSP00000357475	ATP8B2	0
ENSP00000357555	RPS27	0
ENSP00000357650	SLC27A3	0
ENSP00000357668	ADAM12	0
ENSP00000357683	CHTOP	0
ENSP00000357789	FLG	0
ENSP00000357791	HRNR	0
ENSP00000303963	CTRB2	0
ENSP00000356634	PAPPA2	0
ENSP00000354346	MATR3	0
ENSP00000352712	DACH1	0
ENSP00000352738	G3BP2	0
ENSP00000352904	NT5C1B	0
ENSP00000352911	NUDT16	0
ENSP00000352956	RBM23	0
ENSP00000352976	AMZ2	0
ENSP00000353072	ATP2A3	0
ENSP00000353769	SCAF1	0
ENSP00000353826	LONP1	0
ENSP00000353920	ADARB1	0
ENSP00000355325	PSMB5	0
ENSP00000354294	CTRB1	0
ENSP00000347213	ENTPD2	0
ENSP00000354486	GOLGA4	0
ENSP00000354490	ATP1A2	0
ENSP00000354580	MRPL21	0
ENSP00000354722	EIF1AY	0
ENSP00000354782	CD247	0
ENSP00000354995	ABCG1	0
ENSP00000355011	ILF2	0
ENSP00000355028	DZIP3	0
ENSP00000355051	TAF13	0
ENSP00000355089	CELF4	0
ENSP00000354255	CPZ	0
ENSP00000339532	THUMPD3	0
ENSP00000341021	NANOS2	0
ENSP00000338413	UBA1	0
ENSP00000338477	HNRNPF	0
ENSP00000338512	AGTPBP1	0
ENSP00000338624	TASP1	0
ENSP00000338860	ZNF444	0
ENSP00000339016	ATAD1	0
ENSP00000339090	RBMX2	0
ENSP00000339157	CPM	0
ENSP00000339182	ATP13A4	0
ENSP00000338093	TARSL2	0
ENSP00000339479	NT5C2	0
ENSP00000337926	SUGP2	0
ENSP00000339585	ZNF449	0
ENSP00000339795	RPL7	0
ENSP00000339845	DROSHA	0
ENSP00000340278	PARK7	0
ENSP00000340281	EIF4G2	0
ENSP00000340329	CAPRIN1	0
ENSP00000340427	ERMP1	0
ENSP00000340505	SENP8	0
ENSP00000340523	NMNAT3	0
ENSP00000347409	KEL	0
ENSP00000339208	DPP8	0
ENSP00000336666	AP1S1	0
ENSP00000333837	MRPL12	0
ENSP00000333905	PPP2R5C	0
ENSP00000333926	ABCC5	0
ENSP00000334052	LGMN	0
ENSP00000334113	DHRSX	0
ENSP00000334308	SYNE3	0
ENSP00000334538	SREK1	0
ENSP00000334611	TMPRSS11A	0
ENSP00000334801	DHRS4L2	0
ENSP00000334808	USP16	0
ENSP00000338218	RNF213	0
ENSP00000336543	SNURF	0
ENSP00000341285	HNRNPA1L2	0
ENSP00000336701	RAD51C	0
ENSP00000336752	FIP1L1	0
ENSP00000336783	TNRC6C	0
ENSP00000337146	ENOX2	0
ENSP00000337363	ZNF394	0
ENSP00000337501	NRIP2	0
ENSP00000337632	SARNP	0
ENSP00000337724	ZNF202	0
ENSP00000337736	AKAP1	0
ENSP00000337759	DOM3Z	0
ENSP00000335106	KATNA1	0
ENSP00000346045	RPS17	0
ENSP00000340823	GTF2F2	0
ENSP00000344847	ADAMTS12	0
ENSP00000344989	DALRD3	0
ENSP00000345156	RPL14	0
ENSP00000345339	ZNF323	0
ENSP00000345395	PAPLN	0
ENSP00000345412	CPSF7	0
ENSP00000345809	ZNF197	0
ENSP00000345895	NUP50	0
ENSP00000346001	RPL3	0
ENSP00000344779	RHBDD1	0
ENSP00000346037	RPLP1	0
ENSP00000344674	DHRS2	0
ENSP00000346046	RPS17L	0
ENSP00000346050	RPS3A	0
ENSP00000346067	RPSA	0
ENSP00000346088	RPL22	0
ENSP00000346206	TAP1	0
ENSP00000346236	DDX46	0
ENSP00000346240	FBXO2	0
ENSP00000346478	ADAMTSL2	0
ENSP00000346874	FAR1	0
ENSP00000346890	NRD1	0
ENSP00000346027	RPL21	0
ENSP00000343577	TPSAB1	0
ENSP00000341730	RPL10	0
ENSP00000341885	RPS2	0
ENSP00000341942	ATP13A5	0
ENSP00000341992	NANOS3	0
ENSP00000342216	ABCA9	0
ENSP00000342262	NUP43	0
ENSP00000342278	OAS2	0
ENSP00000342481	ATP9A	0
ENSP00000342502	PYCR2	0
ENSP00000343054	RBM5	0
ENSP00000344829	QPCT	0
ENSP00000343557	ZCCHC17	0
ENSP00000357812	TDRKH	0
ENSP00000343674	ASTL	0
ENSP00000343701	KPNA1	0
ENSP00000343900	CPSF4L	0
ENSP00000343943	PPOX	0
ENSP00000343951	ABHD12B	0
ENSP00000343966	PSPC1	0
ENSP00000344155	ABCA2	0
ENSP00000344223	MBTPS1	0
ENSP00000344401	LIN28B	0
ENSP00000344537	TAF6	0
ENSP00000343081	PUS7L	0

## Sheet: RSV shortest path proteins
RSV Shortest path human proteins
Ensembl Protein ID	Gene	Betweenness
ENSP00000269305	TP53	15809765
ENSP00000344456	CTNNB1	5756301
ENSP00000263253	EP300	5694027
ENSP00000339007	GRB2	5591895
ENSP00000275493	EGFR	5245421
ENSP00000270202	AKT1	4663263
ENSP00000264657	STAT3	4180564
ENSP00000350941	SRC	3180369
ENSP00000348461	RAC1	3066312
ENSP00000221494	SF3A2	2994393
ENSP00000417281	MDM2	2686189
ENSP00000338345	SNCA	2647616
ENSP00000206249	ESR1	2643164
ENSP00000296271	RHO	2573058
ENSP00000329623	BCL2	2541856
ENSP00000376609	GRK5	2364221
ENSP00000337825	LCK	2306232
ENSP00000314458	CDC42	2174421
ENSP00000262613	SLC9A3R1	2097178
ENSP00000355865	PARK2	2033100
ENSP00000264033	CBL	1930392
ENSP00000269571	ERBB2	1922027
ENSP00000338018	HIF1A	1915325
ENSP00000324806	GSK3B	1910676
ENSP00000215832	MAPK1	1831541
ENSP00000358490	CD2	1751073
ENSP00000262160	SMAD2	1727787
ENSP00000304903	CD2BP2	1714523
ENSP00000362649	HDAC1	1703720
ENSP00000353483	MAPK8	1702626
ENSP00000261799	PDGFRB	1679113
ENSP00000003084	CFTR	1662248
ENSP00000401303	SHC1	1548773
ENSP00000321656	CDC25C	1521621
ENSP00000357656	FYN	1503978
ENSP00000326366	PSEN1	1498004
ENSP00000230354	TBP	1458835
ENSP00000300093	PLK1	1444680
ENSP00000350283	BRCA1	1389799
ENSP00000228307	PXN	1358706
ENSP00000329357	SP1	1347630
ENSP00000361626	YBX1	1342956
ENSP00000387662	GCG	1321174
ENSP00000367207	MYC	1284185
ENSP00000284981	APP	1273759
ENSP00000227507	CCND1	1271033
ENSP00000304895	IRS1	1266988
ENSP00000384273	RELA	1234025
ENSP00000222812	STX1A	1232284
ENSP00000324897	UBE2I	1197214
ENSP00000371067	JAK2	1172819
ENSP00000269260	ARRB2	1168521
ENSP00000361021	PTEN	1127095
ENSP00000354558	MTOR	1107662
ENSP00000341189	PTK2	1103876
ENSP00000396127	RAN	1073709
ENSP00000269321	ARHGDIA	1054927
ENSP00000262367	CREBBP	1013327
ENSP00000011653	CD4	990851
ENSP00000357879	PSMD4	966807
ENSP00000341551	SMAD4	945466
ENSP00000258682	CAMK2B	942566
ENSP00000279593	GRIN2B	915205
ENSP00000264708	POMC	880701
ENSP00000372023	CHEK2	869939
ENSP00000335153	HSP90AA1	821501
ENSP00000348577	RANGAP1	787573
ENSP00000354394	STAT1	786764
ENSP00000309503	YWHAZ	777958
ENSP00000314949	POLR2A	775153
ENSP00000228872	CDKN1B	770083
ENSP00000349467	CALM1	753594
ENSP00000340944	PTPN11	751794
ENSP00000268182	IQGAP1	749193
ENSP00000368438	PCNA	747318
ENSP00000243050	NR4A1	745057
ENSP00000309845	HRAS	732244
ENSP00000251849	RAF1	715845
ENSP00000212015	SIRT1	705156
ENSP00000380378	PAFAH1B1	685645
ENSP00000265171	EGF	677233
ENSP00000278916	CHEK1	676765
ENSP00000305769	SMAD1	674896
ENSP00000356425	UCHL5	669236
ENSP00000356438	PTGS2	661603
ENSP00000244007	PLCG1	660869
ENSP00000363822	AR	657899
ENSP00000380280	FGFR1	648182
ENSP00000223023	WASL	647102
ENSP00000266970	CDK2	639168
ENSP00000251810	RRM2B	634972
ENSP00000224764	BMPR1A	634129
ENSP00000274026	CCNA2	615364
ENSP00000319664	NUDC	612043
ENSP00000418447	PPP2CA	608928
ENSP00000215829	SNRPD3	608059
ENSP00000216797	NFKBIA	600394
ENSP00000254227	NR0B2	598572
ENSP00000277541	NOTCH1	585885
ENSP00000302955	RRM2	579553
ENSP00000300738	RRM1	578900
ENSP00000315644	TYMS	573072
ENSP00000226574	NFKB1	569079
ENSP00000336790	ATF4	566138
ENSP00000264951	XRN1	556901
ENSP00000281537	TJP1	554026
ENSP00000343535	USP7	548712
ENSP00000280892	EIF4E	537493
ENSP00000332973	SMAD3	524613
ENSP00000250003	MYOD1	521805
ENSP00000282561	GJA1	521782
ENSP00000339527	FOXO3	520153
ENSP00000371432	PRLR	518054
ENSP00000267859	BNIP2	515168
ENSP00000298316	ARF6	514956
ENSP00000252486	APOE	512562
ENSP00000254976	SNAP25	508364
ENSP00000353059	APAF1	504171
ENSP00000283195	RANBP2	490804
ENSP00000292303	CCR5	487581
ENSP00000259808	RIPK1	487176
ENSP00000304169	PITX2	487098
ENSP00000419851	GMPS	480686
ENSP00000256383	EIF2S1	476681
ENSP00000356832	SGK1	475057
ENSP00000277120	NTRK2	466321
ENSP00000356505	NCF2	463800
ENSP00000265023	KNG1	460842
ENSP00000345571	E2F1	444044
ENSP00000399968	NCOA2	435904
ENSP00000367408	CASK	433660
ENSP00000361125	VEGFA	432521
ENSP00000364133	TGFBR1	424299
ENSP00000321584	IMPDH2	423342
ENSP00000310127	IRF3	417869
ENSP00000221930	TGFB1	414460
ENSP00000377446	SUCLG1	412607
ENSP00000380921	SH3KBP1	408379
ENSP00000268035	IGF1R	402530
ENSP00000354791	DCTN1	402230
ENSP00000317159	CYC1	401536
ENSP00000262320	AXIN1	393073
ENSP00000351777	VCP	392773
ENSP00000299293	FRS2	382899
ENSP00000162330	BCAR1	379651
ENSP00000351273	CASP8	379507
ENSP00000358622	IKBKG	376018
ENSP00000364898	SYK	374883
ENSP00000221972	CD79A	372175
ENSP00000352608	RYR1	364505
ENSP00000340698	GIPC1	363376
ENSP00000297494	NOS3	361338
ENSP00000300574	CRK	360836
ENSP00000264867	PPARGC1A	359297
ENSP00000357625	BNIP3	357479
ENSP00000376076	SUMO1	356621
ENSP00000303830	INSR	353048
ENSP00000339151	IKBKB	347448
ENSP00000261349	LRP6	344707
ENSP00000273047	RAB5A	343320
ENSP00000256443	CDK7	342193
ENSP00000360798	EPS15	339729
ENSP00000350720	SMARCA4	338368
ENSP00000297261	SHH	335225
ENSP00000294172	NXF1	334780
ENSP00000358716	DDX20	333091
ENSP00000309831	SNUPN	329279
ENSP00000172229	NGFR	328160
ENSP00000243776	CHPF	328018
ENSP00000360683	PTPN1	321840
ENSP00000374455	SQSTM1	321185
ENSP00000338934	EZR	320842
ENSP00000362413	PGK1	320262
ENSP00000247668	TRAF2	318181
ENSP00000299421	ILK	316437
ENSP00000316136	KCNJ1	312529
ENSP00000363970	MAP1LC3A	311594
ENSP00000229239	GAPDH	311248
ENSP00000352516	DNMT1	309503
ENSP00000261769	CDH1	305988
ENSP00000209728	CDC6	304830
ENSP00000351908	MAP3K5	302560
ENSP00000288986	NCK1	302410
ENSP00000419692	RXRA	301721
ENSP00000348069	SREBF1	299868
ENSP00000351407	ARNT	299735
ENSP00000278568	PAK1	297803
ENSP00000265165	LEF1	297359
ENSP00000356024	CR2	297213
ENSP00000381607	GSTP1	296640
ENSP00000267996	TPM1	296576
ENSP00000293272	CCL5	292826
ENSP00000351486	NTRK1	289578
ENSP00000219255	PARD6A	288865
ENSP00000312435	DAG1	284449
ENSP00000301633	BIRC5	277979
ENSP00000359424	CHUK	277218
ENSP00000285398	ERCC3	276483
ENSP00000287820	PPARG	276080
ENSP00000352561	CALCR	274574
ENSP00000368104	BMP2	271670
ENSP00000227378	HSPA8	266845
ENSP00000352514	RUNX2	259701
ENSP00000363868	ABCA1	259497
ENSP00000331746	CALCA	259193
ENSP00000338548	FGF1	255067
ENSP00000292408	FGFR4	249122
ENSP00000333194	RGS19	247641
ENSP00000295897	ALB	247570
ENSP00000315955	FOXA2	247273
ENSP00000205402	DLD	246162
ENSP00000265335	RAD50	244615
ENSP00000287727	ZFYVE9	243851
ENSP00000354251	NCKAP1	241351
ENSP00000280357	IL18	239946
ENSP00000302486	MAP2K1	236067
ENSP00000336747	HIP1	235335
ENSP00000262238	YY1	235265
ENSP00000363641	TXN	234697
ENSP00000296930	NPM1	233684
ENSP00000287598	BUB1B	232940
ENSP00000257408	KLB	232430
ENSP00000256442	CCNB1	231907
ENSP00000347942	RET	230226
ENSP00000298139	WRN	230179
ENSP00000332549	GRIN2A	229947
ENSP00000219476	TSC2	225396
ENSP00000346437	ATG7	224777
ENSP00000325690	CARM1	224645
ENSP00000334382	HOMER1	224546
ENSP00000401980	MAVS	223845
ENSP00000317904	GYS1	223741
ENSP00000311449	RAB6A	223608
ENSP00000363921	PARD3	222209
ENSP00000397552	ACTL6A	221200
ENSP00000242057	AHR	219826
ENSP00000407879	MYH14	217767
ENSP00000339191	CAV1	216642
ENSP00000361275	PLK3	215275
ENSP00000311113	JUP	212898
ENSP00000297518	CDK5	212159
ENSP00000263967	PIK3CA	210866
ENSP00000360290	PRKAA2	209497
ENSP00000313950	AURKB	209218
ENSP00000361066	NCOA3	208678
ENSP00000340691	EIF4EBP1	207910
ENSP00000262077	NUP153	206445
ENSP00000315442	NR1H4	204414
ENSP00000269485	TNFRSF11A	202357
ENSP00000289779	F11R	201728
ENSP00000220764	DECR1	200836
ENSP00000348877	GPI	197854
ENSP00000263923	KDR	197614
ENSP00000381339	GNAT3	196549
ENSP00000358997	IRAK1	196298
ENSP00000349437	IGF2R	195752
ENSP00000254942	TERF2	195686
ENSP00000220592	EIF2C2	195628
ENSP00000369213	DDX58	194786
ENSP00000318195	NCL	194550
ENSP00000281821	EPHA4	194305
ENSP00000315859	RNPS1	192099
ENSP00000248594	PTPN12	190705
ENSP00000290158	KPNB1	189697
ENSP00000265563	PRKAR2A	188485
ENSP00000324549	CYFIP1	187847
ENSP00000374354	EXOSC8	187798
ENSP00000245451	BMP4	187277
ENSP00000309555	HCFC1	187044
ENSP00000265056	MCM2	186834
ENSP00000216911	AURKA	185991
ENSP00000302530	BUB1	183918
ENSP00000301634	TK1	183836
ENSP00000309572	TERT	181727
ENSP00000231509	NR3C1	181045
ENSP00000229794	MAPK14	180399
ENSP00000262030	ATP5B	179506
ENSP00000380252	NFE2L2	178368
ENSP00000354621	SMURF1	177810
ENSP00000366013	GNB2L1	177469
ENSP00000302967	HDAC3	177123
ENSP00000344115	CDH5	176627
ENSP00000358563	DKC1	175946
ENSP00000263980	SLC9A1	175358
ENSP00000417404	HFE	174641
ENSP00000239849	TNFSF11	173272
ENSP00000263033	SYTL4	171997
ENSP00000312999	GNAI2	171289
ENSP00000320935	SLC2A4	170230
ENSP00000302961	HSPA4	169779
ENSP00000307046	SDC2	169202
ENSP00000278616	ATM	167630
ENSP00000209875	CBX5	166362
ENSP00000293288	BAX	164673
ENSP00000171111	KEAP1	163766
ENSP00000269141	CDH2	163430
ENSP00000258301	STX6	161934
ENSP00000327758	NKX2-5	159675
ENSP00000317331	SSR4	159557
ENSP00000318297	RUVBL1	158494
ENSP00000298556	HPRT1	157374
ENSP00000364212	CDA	157362
ENSP00000343204	JAK1	157140
ENSP00000368699	ISG15	156825
ENSP00000331201	HGS	155866
ENSP00000304669	CTNNA1	155761
ENSP00000317985	ROCK2	155733
ENSP00000340820	MAPT	155610
ENSP00000264972	ZAP70	155360
ENSP00000348827	THRB	154431
ENSP00000352929	CSNK1E	153960
ENSP00000330393	LEPR	153413
ENSP00000342143	PDZK1	152585
ENSP00000247461	CANX	152478
ENSP00000246551	HCST	152219
ENSP00000408005	SLC9A3R2	152214
ENSP00000344259	UBE2L3	151359
ENSP00000267868	RAD51	147348
ENSP00000345206	RBPJ	147268
ENSP00000216714	APEX1	146957
ENSP00000221957	PLIN3	146822
ENSP00000254719	RPA1	146471
ENSP00000383623	MLLT4	146436
ENSP00000262158	SMAD7	146267
ENSP00000273430	AGTR1	145914
ENSP00000367756	UNC13B	145833
ENSP00000249636	PIAS1	145086
ENSP00000257904	CDK4	144248
ENSP00000352312	DNAH8	144110
ENSP00000262445	MAP2K4	143903
ENSP00000307235	EIF2AK3	143721
ENSP00000264110	ATF2	142126
ENSP00000311032	CASP3	141960
ENSP00000361405	MMP9	141229
ENSP00000396219	MEF2C	140313
ENSP00000264634	WNT5A	139504
ENSP00000233146	MSH2	138672
ENSP00000337088	MEN1	137915
ENSP00000348708	UPF2	137859
ENSP00000265371	NRP1	137641
ENSP00000343745	DICER1	137587
ENSP00000265354	SRF	137284
ENSP00000265421	POLB	136973
ENSP00000382004	CTNND1	135553
ENSP00000272102	ARF1	133998
ENSP00000262965	TCF3	133475
ENSP00000368683	EDN1	133188
ENSP00000260947	BARD1	133051
ENSP00000240618	KLRK1	132933
ENSP00000298552	TSC1	132887
ENSP00000222005	CDC37	132221
ENSP00000348784	IGBP1	131455
ENSP00000257770	NT5E	130520
ENSP00000347858	XIAP	130113
ENSP00000284384	PRKCA	129995
ENSP00000301843	CTTN	129962
ENSP00000366466	CTNNBIP1	129541
ENSP00000229022	VDR	129232
ENSP00000304592	FASN	128738
ENSP00000363804	KLF4	128497
ENSP00000354876	MT-CO2	128315
ENSP00000253024	TRIM28	127716
ENSP00000262013	SPAG9	127291
ENSP00000366135	EXOSC10	127289
ENSP00000268171	FURIN	126936
ENSP00000245932	VASP	126652
ENSP00000310596	LSM1	126474
ENSP00000303452	TRH	126420
ENSP00000288266	APPL1	126201
ENSP00000341940	CAV3	125584
ENSP00000254657	PER2	125139
ENSP00000332049	CD86	124169
ENSP00000368682	PHEX	123547
ENSP00000376792	VTI1A	123489
ENSP00000285930	AKR1B1	123041
ENSP00000379330	NFATC2	122974
ENSP00000369497	BRCA2	122691
ENSP00000363055	ZWINT	121973
ENSP00000374372	SPTB	121755
ENSP00000316176	UBE2N	121398
ENSP00000216225	RBX1	120235
ENSP00000378338	GIT1	119475
ENSP00000367124	SLC3A2	119004
ENSP00000297146	GPR85	118583
ENSP00000310036	CD34	118275
ENSP00000369889	COL2A1	118150
ENSP00000263317	NOX4	117945
ENSP00000331327	WT1	117856
ENSP00000362361	CDK9	117842
ENSP00000324173	HSPA5	117646
ENSP00000370938	CDK8	117580
ENSP00000369820	PIGA	117378
ENSP00000324856	STK11	117326
ENSP00000325448	KARS	116081
ENSP00000234396	ATP6V1B1	116035
ENSP00000383199	NEDD4L	114932
ENSP00000380942	ARHGEF12	114906
ENSP00000301838	FADD	114503
ENSP00000246062	MKKS	113951
ENSP00000225577	RPS6KB1	113598
ENSP00000358918	SUFU	112985
ENSP00000274376	RASA1	112659
ENSP00000323588	SOX2	112104
ENSP00000354923	DMD	111313
ENSP00000307387	PDCD6IP	110903
ENSP00000241014	MAPK8IP1	110399
ENSP00000303706	CDC25A	110068
ENSP00000389140	DCC	109656
ENSP00000355231	BECN1	109060
ENSP00000223129	RPA3	108782
ENSP00000362690	NR5A1	108733
ENSP00000392858	TNF	108673
ENSP00000313420	PRKDC	108640
ENSP00000305372	ADRB2	108599
ENSP00000232014	BCL6	108522
ENSP00000379065	TRPS1	108381
ENSP00000381717	UBE2D2	108344
ENSP00000354782	CD247	108186
ENSP00000219596	MEFV	108139
ENSP00000322788	MMP1	107971
ENSP00000225504	SUPT4H1	107911
ENSP00000304364	C1GALT1C1	107591
ENSP00000355536	MTR	107564
ENSP00000290921	CTBP1	107543
ENSP00000314214	VAMP2	107517
ENSP00000316328	CIITA	107205
ENSP00000355651	RAB4A	106598
ENSP00000302564	BCL2L1	106521
ENSP00000354476	SREBF2	105007
ENSP00000357051	PEX19	104124
ENSP00000354511	COMT	103972
ENSP00000316879	EIF4G1	103881
ENSP00000219070	MMP2	101143
ENSP00000362795	CXCR3	100629
ENSP00000363089	TLR4	99838
ENSP00000233057	EIF2AK2	99548
ENSP00000369757	RPS6	99004
ENSP00000228825	ARPC3	98267
ENSP00000329002	HAX1	98188
ENSP00000313681	SPHK1	97769
ENSP00000306124	PRKCE	97758
ENSP00000270349	SLC6A3	97623
ENSP00000271638	S100A11	97595
ENSP00000286448	VAMP7	97554
ENSP00000344741	INSIG1	97441
ENSP00000317272	MET	96884
ENSP00000359531	GTF2B	96847
ENSP00000318472	NCAM1	96668
ENSP00000315702	MOB4	96541
ENSP00000360286	RAE1	95849
ENSP00000364188	DDOST	94124
ENSP00000354687	MT-ND1	94112
ENSP00000200181	ITGB4	93879
ENSP00000242480	EGR2	93868
ENSP00000349252	ITGAL	93503
ENSP00000217244	CSNK2A1	92583
ENSP00000173229	NTN1	91884
ENSP00000258962	SRSF1	91838
ENSP00000316338	BAIAP2	91592
ENSP00000381331	HDAC2	91391
ENSP00000338072	AVPR2	91213
ENSP00000294179	STX5	91115
ENSP00000329967	TBK1	89817
ENSP00000331817	ALYREF	89358
ENSP00000246914	WNK4	89305
ENSP00000347507	MYH7	89293
ENSP00000221448	SNRNP70	89063
ENSP00000373952	FANCA	88976
ENSP00000367446	EXT1	88971
ENSP00000262418	SLC4A1	88885
ENSP00000257857	CD63	88730
ENSP00000326031	PPP1CA	88526
ENSP00000357838	OAT	88522
ENSP00000332659	CCR4	88515
ENSP00000234313	PLEK	88454
ENSP00000411012	NSMAF	88440
ENSP00000333769	BSG	88407
ENSP00000339328	PLAUR	88291
ENSP00000369981	SH3GL2	88153
ENSP00000263817	ABCB11	88027
ENSP00000351665	CLIP1	88005
ENSP00000278572	RPS3	87896
ENSP00000263640	ACVR1	87805
ENSP00000264010	CTCF	87448
ENSP00000358857	EMD	87446
ENSP00000287936	HMGCR	87233
ENSP00000218516	GLA	86957
ENSP00000313169	NPHP1	86931
ENSP00000338703	UGP2	86812
ENSP00000282397	FLT1	86796
ENSP00000335544	CCKBR	85955
ENSP00000349576	DCTD	85811
ENSP00000388526	HLA-A	85607
ENSP00000384665	LPAR2	85288
ENSP00000264498	FGF2	84230
ENSP00000256897	CCNH	83601
ENSP00000310572	PSMC5	83045
ENSP00000355370	CNTF	82483
ENSP00000317714	STX4	82421
ENSP00000367615	APRT	82294
ENSP00000355759	PARP1	81838
ENSP00000333001	RBM8A	81592
ENSP00000345731	DLG1	81435
ENSP00000216832	PNN	81409
ENSP00000312987	HNF4A	81034
ENSP00000352842	PFKM	80702
ENSP00000271015	BCL10	80349
ENSP00000276603	TERF1	80209
ENSP00000265565	SCAP	80047
ENSP00000257555	HNF1A	79422
ENSP00000337915	CYP3A4	79224
ENSP00000265814	RUNX1T1	78872
ENSP00000287934	FZD1	78592
ENSP00000293330	HCRT	78590
ENSP00000230321	MDFI	78574
ENSP00000257497	ANXA1	78501
ENSP00000044462	PSMA4	78467
ENSP00000334188	PFDN5	78316
ENSP00000316244	HTR1A	78282
ENSP00000329419	COPB2	78191
ENSP00000368119	GALT	77995
ENSP00000239938	EGR1	77978
ENSP00000331736	SELE	77865
ENSP00000356919	ATF6	77860
ENSP00000368880	FOXO1	77437
ENSP00000267101	ERBB3	77361
ENSP00000350003	CCR3	77117
ENSP00000407401	PEX5	77115
ENSP00000286648	DCK	76971
ENSP00000303522	TACR1	76431
ENSP00000352121	PIK3CG	76009
ENSP00000349547	RASSF1	75954
ENSP00000345270	MGAT3	75908
ENSP00000365858	GATA1	75257
ENSP00000301972	MYRIP	74880
ENSP00000300305	RUNX1	74376
ENSP00000219252	POLR2C	74265
ENSP00000306606	ADH1B	73597
ENSP00000363763	EPHB2	73193
ENSP00000224237	VIM	72722
ENSP00000322570	POLE	72491
ENSP00000347184	HTT	72334
ENSP00000249071	RAC2	72092
ENSP00000356248	PTPN7	71832
ENSP00000220809	PLAT	71695
ENSP00000363019	UBE2D1	71534
ENSP00000377192	G6PD	70534
ENSP00000039007	OTC	70414
ENSP00000327850	NFATC1	70276
ENSP00000336740	LIMK1	69718
ENSP00000405041	POU5F1	69590
ENSP00000204961	EFNB1	69515
ENSP00000386331	MYO7A	69279
ENSP00000252699	ACTN4	69244
ENSP00000225831	CCL2	69078
ENSP00000386884	CXCR4	69023
ENSP00000306866	GABARAP	68998
ENSP00000231790	MLH1	68830
ENSP00000381066	MAP2K7	68818
ENSP00000312288	HADH	68762
ENSP00000256646	NOTCH2	68747
ENSP00000251968	TSG101	68701
ENSP00000308176	BTK	68620
ENSP00000354125	EIF3B	68546
ENSP00000408617	HDAC9	68534
ENSP00000354340	UBA3	68499
ENSP00000355518	FH	68469
ENSP00000220584	FDFT1	68283
ENSP00000312262	ADRBK1	68138
ENSP00000293549	WNT1	68137
ENSP00000175506	ASNS	67809
ENSP00000262735	PPARA	67543
ENSP00000380024	ING4	67319
ENSP00000256429	MBD2	66840
ENSP00000337838	RTN4	66738
ENSP00000318868	SHMT1	66327
ENSP00000354586	GLI2	66135
ENSP00000297785	ALDH1A1	65988
ENSP00000294785	NCSTN	65977
ENSP00000009589	RPS20	65924
ENSP00000341957	TP53BP2	65815
ENSP00000362063	CSTF2	65464
ENSP00000381045	UBE3A	65123
ENSP00000355192	CACNA1S	65097
ENSP00000257818	LMO2	65005
ENSP00000305503	NUP62	64833
ENSP00000385269	ELAVL1	63980
ENSP00000363708	BMPR2	63751
ENSP00000342307	FOXM1	63739
ENSP00000332353	PTCH1	63548
ENSP00000312436	NFE2	62973
ENSP00000367830	PRKCZ	62635
ENSP00000263025	MAPK3	62474
ENSP00000334122	FGF3	62408
ENSP00000323816	AHRR	62304
ENSP00000354927	MAP3K3	61681
ENSP00000299402	APBB1	61527
ENSP00000260010	TLR2	60976
ENSP00000249396	SIRT2	60915
ENSP00000354532	PNP	60569
ENSP00000270142	SOD1	60346
ENSP00000222256	RAB3A	60269
ENSP00000368632	GATA3	59911
ENSP00000358994	MYO6	59841
ENSP00000285379	CA2	59708
ENSP00000381793	GRB10	59609
ENSP00000354673	CNOT4	59303
ENSP00000368401	PAX6	59182
ENSP00000361110	GBGT1	59175
ENSP00000221413	RUVBL2	59170
ENSP00000369055	B4GALT1	59144
ENSP00000332468	TRAF3	59116
ENSP00000283684	ATP8B1	59099
ENSP00000353154	NFASC	59020
ENSP00000276201	UPF3B	59006
ENSP00000229214	KRR1	59004
ENSP00000223190	NRF1	58997
ENSP00000226359	AFP	58987
ENSP00000364847	MAGED1	58980
ENSP00000233638	TLX2	58979
ENSP00000262746	PRDX1	58977
ENSP00000396813	PSMB9	58974
ENSP00000345708	KCNJ11	58970
ENSP00000265773	SMARCA2	58964
ENSP00000366244	ARAF	58953
ENSP00000356520	DHX9	58952
ENSP00000369127	DNAJA1	58952
ENSP00000290649	AMFR	58916
ENSP00000353508	MAP2	58887
ENSP00000302768	PAIP1	58826
ENSP00000240123	SORBS3	58797
ENSP00000384554	CLDN5	58763
ENSP00000363512	ALOX5	58736
ENSP00000359239	HAUS7	58663
ENSP00000337452	NIPA1	58660
ENSP00000420127	RAB9A	58638
ENSP00000328511	KCNA4	58607
ENSP00000355520	RGS7	58605
ENSP00000363480	DLG3	58524
ENSP00000170630	IL4R	58464
ENSP00000380150	CARD11	58448
ENSP00000351602	FUT4	58428
ENSP00000265641	CPT1A	58400
ENSP00000262803	UPF1	58305
ENSP00000348554	CDC16	58277
ENSP00000244769	ATXN1	58187
ENSP00000265175	SEC24B	58145
ENSP00000263202	UFD1L	57990
ENSP00000321606	CRMP1	57745
ENSP00000369293	IL2RA	57725
ENSP00000262554	SPTLC1	57724
ENSP00000265643	GAL	57723
ENSP00000215587	POLR2E	57272
ENSP00000338983	MUC1	57200
ENSP00000291700	S100B	57101
ENSP00000323421	SMC1A	57042
ENSP00000229854	MCM3	56426
ENSP00000285021	XPC	56422
ENSP00000354813	MT-ND5	56059
ENSP00000285039	MYO5B	56032
ENSP00000262435	SMURF2	55478
ENSP00000322142	ING5	55376
ENSP00000334458	GATA4	55245
ENSP00000342952	ADCY2	55075
ENSP00000263734	EPAS1	54772
ENSP00000264335	YWHAE	53815
ENSP00000405934	ITPR1	53474
ENSP00000215754	MIF	53450
ENSP00000286548	GNAQ	53236
ENSP00000377148	AP1G1	52977
ENSP00000362994	TRAF1	52868
ENSP00000257979	MIP	52796
ENSP00000329411	IRF7	52782
ENSP00000321326	F2R	52486
ENSP00000350708	RAD23B	51889
ENSP00000342235	ERBB4	51457
ENSP00000309597	MAP3K11	51310
ENSP00000354945	MCM10	51116
ENSP00000271628	SF3B4	51022
ENSP00000364895	ZBTB17	50886
ENSP00000357731	LOR	50786
ENSP00000268057	BBS4	50778
ENSP00000363092	PRKG1	50501
ENSP00000305422	CEBPB	50375
ENSP00000300060	ANPEP	50297
ENSP00000375863	HNRNPUL1	50191
ENSP00000254122	FSHB	50169
ENSP00000278715	HMBS	50044
ENSP00000352257	XRCC6	49899
ENSP00000234590	ENO1	49822
ENSP00000335311	EDNRB	49819
ENSP00000225983	HDAC5	49787
ENSP00000261205	SYT1	49764
ENSP00000371236	GART	49754
ENSP00000296255	RPN1	49748
ENSP00000360532	CDC5L	49674
ENSP00000216341	GZMB	49650
ENSP00000362082	CCND3	49505
ENSP00000345656	VAPA	49466
ENSP00000359074	L1CAM	49465
ENSP00000380349	CAPN3	49385
ENSP00000373614	SELPLG	49350
ENSP00000374357	ARNTL	49347
ENSP00000009530	CD74	49313
ENSP00000320885	SPAST	49251
ENSP00000274459	ATG12	49220
ENSP00000341680	DTNBP1	49219
ENSP00000363390	TRIM63	49216
ENSP00000281453	MLF1IP	49199
ENSP00000351490	MAX	49179
ENSP00000350132	PLN	49178
ENSP00000362849	CTNNA3	49171
ENSP00000264001	CKLF	49161
ENSP00000251047	LMAN1	49157
ENSP00000234420	MSH6	49154
ENSP00000377793	PRC1	49149
ENSP00000264170	KYNU	49143
ENSP00000265572	OPRK1	49132
ENSP00000263431	PRKCG	49131
ENSP00000309259	ALAS1	49131
ENSP00000307822	NPFFR2	49129
ENSP00000215909	LGALS1	49122
ENSP00000342215	KIR2DL3	49113
ENSP00000362608	PIM1	49113
ENSP00000262052	SLC11A2	49091
ENSP00000334061	HDAC6	49089
ENSP00000307875	B3GAT1	49086
ENSP00000341835	MYOCD	49077
ENSP00000249923	COPB1	49077
ENSP00000269397	CBX4	49075
ENSP00000344460	CBS	49057
ENSP00000372746	HLA-DRA	49049
ENSP00000228958	EIF2B1	49048
ENSP00000233838	GGCX	49043
ENSP00000366084	ABCC4	49007
ENSP00000330032	UPP1	49000
ENSP00000395535	MECP2	48994
ENSP00000347379	OCLN	48967
ENSP00000251654	PCCB	48966
ENSP00000267430	FANCM	48965
ENSP00000000412	M6PR	48959
ENSP00000222248	SLC5A5	48956
ENSP00000264734	CLDN16	48956
ENSP00000347198	SRGAP1	48903
ENSP00000254584	ARFIP2	48886
ENSP00000366006	UBIAD1	48881
ENSP00000357177	ARHGEF11	48789
ENSP00000256015	BTG1	48768
ENSP00000353408	MSN	48754
ENSP00000334008	PARVA	48705
ENSP00000356918	STX7	48693
ENSP00000293308	KRT8	48687
ENSP00000280362	PTS	48652
ENSP00000303709	UBE2E1	48505
ENSP00000359506	FMR1	48411
ENSP00000303507	BCR	48368
ENSP00000009180	CD9	48145
ENSP00000377303	RENBP	48140
ENSP00000253699	ZFYVE20	48079
ENSP00000351049	PAK4	48075
ENSP00000348307	SIRPA	47683
ENSP00000306620	ADCYAP1R1	47562
ENSP00000321239	RCHY1	47434
ENSP00000254351	SDC1	46755
ENSP00000288135	KIT	46691
ENSP00000349465	PICK1	46425
ENSP00000354119	LAT	46032
ENSP00000286355	ADCY8	45816
ENSP00000356070	MAPKAPK2	45771
ENSP00000413720	CDKN1C	45385
ENSP00000265734	CDK6	45177
ENSP00000276682	EIF3H	44805
ENSP00000286621	ADK	44360
ENSP00000344789	ACACA	43839
ENSP00000359573	LMO4	43384
ENSP00000354623	DFNB31	42948
ENSP00000387286	RAB1A	42647
ENSP00000209668	ADH1A	42318
ENSP00000268261	PMM2	41950
ENSP00000408236	CYTH2	41876
ENSP00000358335	MAP3K7	41505
ENSP00000352408	BABAM1	41505
ENSP00000296140	CCR1	41103
ENSP00000156825	MBD3	41089
ENSP00000360181	SH2D1A	40983
ENSP00000282753	GRM1	40913
ENSP00000300935	RAB8A	40753
ENSP00000361777	SET	40618
ENSP00000317334	TCP1	40553
ENSP00000262027	MARS	40478
ENSP00000349960	ACTB	40332
ENSP00000386284	ALAD	40270
ENSP00000262502	SLC12A3	40207
ENSP00000296223	POLR2H	40152
ENSP00000307863	U2AF2	40083
ENSP00000365663	NPPA	39949
ENSP00000359988	SRSF11	39872
ENSP00000301178	AXL	39867
ENSP00000301764	DDB1	39826
ENSP00000357244	CCT3	39767
ENSP00000354499	MT-CO1	39717
ENSP00000305725	CHST11	39633
ENSP00000262186	KCNH2	39618
ENSP00000324422	ZYX	39554
ENSP00000336741	DHX15	39495
ENSP00000355966	NEK2	39472
ENSP00000363571	MUSK	39470
ENSP00000386187	IFITM1	39461
ENSP00000365048	TNFSF13B	39457
ENSP00000286627	KCNMA1	39445
ENSP00000357708	S100A6	39442
ENSP00000358140	EIF3A	39431
ENSP00000216774	SRP54	39407
ENSP00000273398	ATP6V1A	39370
ENSP00000337103	CHAT	39367
ENSP00000246337	UROD	39364
ENSP00000221859	POLR2I	39347
ENSP00000349174	SLC39A8	39346
ENSP00000254950	VPS4A	39342
ENSP00000327465	MYT1	39342
ENSP00000276072	TAF1	39341
ENSP00000365851	BMI1	39341
ENSP00000268679	CBFA2T3	39339
ENSP00000307078	KIF5B	39339
ENSP00000356623	CITED2	39338
ENSP00000358640	SLC16A1	39337
ENSP00000347495	WARS	39337
ENSP00000408411	LAMP2	39336
ENSP00000221486	RNASEH2A	39335
ENSP00000415481	PROM1	39335
ENSP00000305873	CRTC2	39334
ENSP00000347836	UBE2H	39334
ENSP00000346206	TAP1	39334
ENSP00000244520	SNRPC	39334
ENSP00000315997	LILRB1	39334
ENSP00000417686	SLBP	39334
ENSP00000300107	CLPX	39332
ENSP00000251496	NCAPG	39332
ENSP00000361186	TP53RK	39331
ENSP00000370125	HMGN1	39329
ENSP00000405890	PBX1	39329
ENSP00000345873	SLC26A3	39326
ENSP00000359818	MMS19	39322
ENSP00000365380	FOXP3	39321
ENSP00000292614	POLR2J	39320
ENSP00000372547	SRY	39316
ENSP00000296543	NAA15	39315
ENSP00000245255	PIWIL1	39312
ENSP00000374467	ABCC8	39308
ENSP00000366863	TBC1D4	39307
ENSP00000335062	PDCD1	39307
ENSP00000223215	MEST	39301
ENSP00000221132	TNFRSF10A	39301
ENSP00000354778	CNTNAP2	39300
ENSP00000282441	YAP1	39298
ENSP00000359067	TMEM30A	39294
ENSP00000365439	HNRNPK	39287
ENSP00000386992	IPO11	39268
ENSP00000330054	EEF1A1	39267
ENSP00000417052	EBP	39261
ENSP00000370410	MPDZ	39257
ENSP00000415615	CSNK2B	39255
ENSP00000331103	IP6K2	39251
ENSP00000360869	IFIT1	39243
ENSP00000366307	THBD	39226
ENSP00000360252	HOOK1	39209
ENSP00000286428	VBP1	39179
ENSP00000345997	DMPK	39168
ENSP00000259803	GCM1	39150
ENSP00000241337	GSTM2	39146
ENSP00000262319	TELO2	39135
ENSP00000263094	ABCA7	39134
ENSP00000322542	GTF2I	39130
ENSP00000360268	ALDH18A1	39125
ENSP00000261947	RNF130	39008
ENSP00000344223	MBTPS1	38997
ENSP00000218104	ABCD1	38927
ENSP00000263125	PRKCQ	38921
ENSP00000338127	TESK1	38885
ENSP00000373487	KRT18	38874
ENSP00000228510	MVK	38855
ENSP00000332643	NDN	38842
ENSP00000341826	HNRNPA1	38809
ENSP00000334223	SLC36A2	38806
ENSP00000246533	CAPNS1	38805
ENSP00000311360	RAD9A	38799
ENSP00000311430	RPL4	38762
ENSP00000316578	SUZ12	38750
ENSP00000327246	VIPR1	38673
ENSP00000358081	BAG3	38544
ENSP00000349076	ATN1	38488
ENSP00000303147	MAT2A	38487
ENSP00000296474	MST1R	38424
ENSP00000324124	POLR2L	38396
ENSP00000338157	ZBTB16	38362
ENSP00000358727	GSTO1	38075
ENSP00000301788	POLR2G	38065
ENSP00000296946	T	37910
ENSP00000261772	AARS	37493
ENSP00000263331	POLR1B	37371
ENSP00000276062	NDUFB11	37331
ENSP00000293677	RAVER1	37274
ENSP00000366395	SYVN1	36858
ENSP00000287322	BAG4	36255
ENSP00000239440	ARAP3	35846
ENSP00000281950	GEMIN6	35751
ENSP00000336528	NR1I2	34863
ENSP00000400326	DDX39B	34726
ENSP00000410294	FGFR2	34662
ENSP00000319635	CXCR2	33717
ENSP00000361423	ABL1	33347
ENSP00000280665	DCP1B	33230
ENSP00000294954	LHCGR	33121
ENSP00000247970	PIN1	33043
ENSP00000303634	LRP8	32549
ENSP00000355560	TBCE	32493
ENSP00000241416	ACVR2A	32357
ENSP00000299766	MC4R	32044
ENSP00000359380	SCD	32032
ENSP00000263816	LRP2	31909
ENSP00000365312	ABI1	31708
ENSP00000391676	JAK3	31576
ENSP00000346694	HNRNPA2B1	31530
ENSP00000253004	ASS1	31096
ENSP00000311579	TNKS	30809
ENSP00000354720	SMC3	30736
ENSP00000360492	NDUFA1	30690
ENSP00000370330	ERBB2IP	30660
ENSP00000367923	SUCLA2	30524
ENSP00000358022	MCL1	30457
ENSP00000317659	GUK1	30443
ENSP00000228682	GLI1	30424
ENSP00000216605	MTHFD1	30415
ENSP00000346022	RPL9	30363
ENSP00000037243	GABARAPL2	30272
ENSP00000358866	FLNA	30124
ENSP00000343318	B3GALT5	30111
ENSP00000354238	ENPP1	30086
ENSP00000228918	LTBR	30039
ENSP00000227758	BIRC2	30002
ENSP00000344666	NF2	29999
ENSP00000330341	SOCS3	29999
ENSP00000283179	HNRNPU	29992
ENSP00000228280	KITLG	29959
ENSP00000261643	COX10	29950
ENSP00000215570	TIMM13	29902
ENSP00000347329	SEC31A	29885
ENSP00000293831	EIF4A1	29883
ENSP00000310723	DDX23	29854
ENSP00000317123	SNRNP200	29848
ENSP00000263645	CD81	29829
ENSP00000307525	NMD3	29823
ENSP00000261937	FLT4	29795
ENSP00000263686	SELP	29761
ENSP00000343477	RUNX3	29741
ENSP00000376177	CALCRL	29717
ENSP00000361151	CEL	29703
ENSP00000247138	SLC35A2	29701
ENSP00000261574	IPO5	29639
ENSP00000219789	CDIPT	29633
ENSP00000359663	CD40LG	29614
ENSP00000294724	AGL	29602
ENSP00000264926	RAD18	29591
ENSP00000348211	SLC25A46	29581
ENSP00000379339	RPS29	29571
ENSP00000419494	RYBP	29571
ENSP00000335074	GHRL	29564
ENSP00000011619	RANBP9	29563
ENSP00000343313	ATG5	29562
ENSP00000378782	QPRT	29546
ENSP00000255380	CHRM3	29544
ENSP00000334145	F3	29541
ENSP00000323856	PLEC	29540
ENSP00000178640	MAP2K5	29532
ENSP00000242317	DNAI1	29524
ENSP00000299299	PCBD1	29523
ENSP00000355206	MT-ND3	29517
ENSP00000397323	EHMT2	29517
ENSP00000228916	SCNN1A	29514
ENSP00000261797	NDST1	29513
ENSP00000216727	PABPN1	29513
ENSP00000419945	ERVW-1	29513
ENSP00000349428	PTBP1	29512
ENSP00000363976	HLA-DMA	29512
ENSP00000310623	ISCU	29511
ENSP00000234739	BCL9	29511
ENSP00000258180	KIAA0513	29511
ENSP00000248553	HSPB1	29510
ENSP00000349017	ABCC11	29510
ENSP00000296795	TLR3	29510
ENSP00000357206	NES	29510
ENSP00000317955	EEA1	29509
ENSP00000338348	UBE2G2	29509
ENSP00000362127	MTF1	29508
ENSP00000327647	CRADD	29508
ENSP00000330382	PDGFB	29508
ENSP00000296545	IL15	29508
ENSP00000354003	GYPA	29507
ENSP00000245414	IRF1	29507
ENSP00000312027	CD7	29507
ENSP00000354718	AKAP13	29507
ENSP00000164227	BCL3	29507
ENSP00000373399	PIP5KL1	29507
ENSP00000160382	ACTL6B	29506
ENSP00000383301	ZNF74	29506
ENSP00000341838	TNNI3	29505
ENSP00000394794	PTPN13	29505
ENSP00000343392	XRCC3	29504
ENSP00000355718	DLL1	29504
ENSP00000263187	MSH4	29504
ENSP00000313921	MSRA	29503
ENSP00000254854	GUCY2D	29502
ENSP00000256398	ELP3	29502
ENSP00000281382	PIGF	29502
ENSP00000295314	TMOD4	29501
ENSP00000352721	DNM2	29501
ENSP00000278412	SSRP1	29501
ENSP00000362398	LPAR4	29499
ENSP00000295488	HELQ	29499
ENSP00000347409	KEL	29499
ENSP00000323867	PRKAG1	29499
ENSP00000364361	AC013461.1	29498
ENSP00000351155	ATL1	29498
ENSP00000398698	TNF	29498
ENSP00000351255	STAT4	29497
ENSP00000238497	VPS4B	29497
ENSP00000331831	GAS6	29497
ENSP00000348578	G3BP1	29497
ENSP00000260404	PAK6	29497
ENSP00000261601	USP14	29497
ENSP00000225792	DDX5	29497
ENSP00000250457	EGLN3	29495
ENSP00000350877	SRSF2	29495
ENSP00000376465	GALNT3	29494
ENSP00000362174	ZC3H12A	29494
ENSP00000305675	SDPR	29494
ENSP00000347232	BLM	29493
ENSP00000354671	MAST2	29493
ENSP00000313811	USP20	29492
ENSP00000416293	SLC2A1	29492
ENSP00000353199	CMTM3	29491
ENSP00000254958	JAG1	29487
ENSP00000272223	OSR1	29487
ENSP00000314792	BOLL	29485
ENSP00000354607	FZD5	29483
ENSP00000396538	NFAT5	29483
ENSP00000354522	TOP1	29482
ENSP00000368927	EIF1AX	29480
ENSP00000270538	TIMM44	29480
ENSP00000216639	VRK1	29477
ENSP00000319060	CAMK2G	29470
ENSP00000281419	ASAP2	29467
ENSP00000271657	PI4KB	29466
ENSP00000264018	DDX6	29465
ENSP00000353475	CLDN7	29464
ENSP00000329029	BRF1	29464
ENSP00000369716	CHD3	29464
ENSP00000183605	CLDN18	29457
ENSP00000346120	DDX21	29457
ENSP00000296412	ADH5	29455
ENSP00000273261	LRIG1	29453
ENSP00000205557	ABCC6	29448
ENSP00000357069	PIGM	29446
ENSP00000330276	PTPN21	29445
ENSP00000358142	SV2A	29442
ENSP00000331664	MGAT4C	29440
ENSP00000264474	CSTA	29434
ENSP00000347358	MAGEA11	29433
ENSP00000240093	FZD3	29431
ENSP00000312988	NFKBIB	29430
ENSP00000265447	ANXA11	29426
ENSP00000351605	FZD6	29424
ENSP00000329167	WHSC1	29420
ENSP00000278968	TAGLN	29417
ENSP00000348157	MLF1	29417
ENSP00000296575	HHIP	29417
ENSP00000382034	HLA-DQB1	29415
ENSP00000276533	GINS4	29414
ENSP00000356529	RGS16	29410
ENSP00000355747	PSEN2	29404
ENSP00000351997	MAP2K6	29403
ENSP00000335333	PIP5K1C	29400
ENSP00000362441	ATRX	29397
ENSP00000346402	RNH1	29397
ENSP00000263925	LNX1	29394
ENSP00000368226	GK	29388
ENSP00000248114	GFER	29367
ENSP00000343023	SP100	29364
ENSP00000322991	BCAT2	29361
ENSP00000262662	CDKN2C	29352
ENSP00000265594	MCCC1	29346
ENSP00000347883	PLEKHA7	29332
ENSP00000410732	GABRG2	29331
ENSP00000363397	UGCG	29305
ENSP00000417764	ALG2	29304
ENSP00000346809	PGAP1	29302
ENSP00000217971	PGRMC1	29298
ENSP00000358867	GNAI3	29274
ENSP00000341625	CYB5A	29273
ENSP00000323194	PLXNA4	29249
ENSP00000261636	ARL1	29245
ENSP00000010404	MGST1	29221
ENSP00000353452	MYLK	29198
ENSP00000342059	MAP3K14	29196
ENSP00000306449	GPR37	29182
ENSP00000300086	TERF2IP	29142
ENSP00000344254	FXYD5	29139
ENSP00000306138	GRM5	29077
ENSP00000322706	HMGCS1	29021
ENSP00000308236	COMMD1	29004
ENSP00000300403	TPX2	28997
ENSP00000295006	CAPN2	28975
ENSP00000357040	VANGL2	28930
ENSP00000222139	EPOR	28878
ENSP00000320866	CALR	28852
ENSP00000253363	RBM39	28834
ENSP00000339933	PKLR	28810
ENSP00000358421	HSD3B1	28718
ENSP00000410926	LMLN	28602
ENSP00000389184	MARK2	28587
ENSP00000370119	SMN2	28553
ENSP00000370571	TH	28479
ENSP00000315379	PRPF3	28408
ENSP00000348099	PDLIM7	28375
ENSP00000379353	ST8SIA1	28328
ENSP00000358511	CNR1	28284
ENSP00000263621	ELANE	28251
ENSP00000346659	OCA2	28135
ENSP00000370343	IRF4	27978
ENSP00000351905	TGFBR2	27903
ENSP00000355890	EPRS	27835
ENSP00000381648	PIAS2	27765
ENSP00000341208	STAT5A	27711
ENSP00000339027	RPLP0	27691
ENSP00000247470	PYCARD	27630
ENSP00000320295	TUBB3	27463
ENSP00000242719	RNF11	27317
ENSP00000225567	GOSR2	26768
ENSP00000321999	PTH1R	26730
ENSP00000330330	TMPRSS2	26530
ENSP00000254998	NXT1	26468
ENSP00000292169	S100A1	26442
ENSP00000332816	PTK2B	26337
ENSP00000305416	S1PR1	25984
ENSP00000215780	GSTT2	25853
ENSP00000320171	PKM	25700
ENSP00000392423	RELN	25533
ENSP00000268058	PML	25508
ENSP00000406367	GPR124	25390
ENSP00000166345	TRIP13	25339
ENSP00000253861	EXOC4	25296
ENSP00000323568	SLC2A2	25152
ENSP00000249373	SMO	24871
ENSP00000331775	LIMS1	24799
ENSP00000235310	MAD2L2	24601
ENSP00000411698	USO1	24432
ENSP00000268220	SEC11A	24407
ENSP00000357753	IVL	24294
ENSP00000377969	GTF2F1	24293
ENSP00000353741	ETF1	23745
ENSP00000340361	ACVR2B	23738
ENSP00000222304	HAMP	23721
ENSP00000283131	SMARCA5	23557
ENSP00000329697	PPAP2C	23348
ENSP00000307432	SUCLG2	22809
ENSP00000347719	TBCD	22709
ENSP00000264246	CD80	22607
ENSP00000359300	CETN2	22594
ENSP00000259512	DERL1	22437
ENSP00000316054	DVL3	21844
ENSP00000262999	UCP1	21611
ENSP00000286301	CSF1R	21559
ENSP00000262018	SGCA	21464
ENSP00000287038	RPL30	21413
ENSP00000290200	IL10RB	21386
ENSP00000228284	SART3	21350
ENSP00000371475	TP53BP1	21235
ENSP00000315476	EXOSC4	21133
ENSP00000338562	STX3	21104
ENSP00000344822	S100A13	21074
ENSP00000221496	AMH	21071
ENSP00000295797	PRKCI	21011
ENSP00000297156	CAMLG	20999
ENSP00000222553	NAMPT	20993
ENSP00000264122	CBLB	20929
ENSP00000319476	ICOS	20896
ENSP00000351885	PPP2R4	20804
ENSP00000262039	PIK3C3	20691
ENSP00000174621	TRPV1	20647
ENSP00000264606	HDAC4	20635
ENSP00000216034	TOMM22	20610
ENSP00000270474	PDE4A	20575
ENSP00000344936	PTTG1	20559
ENSP00000254108	FUS	20559
ENSP00000360248	ENTPD1	20551
ENSP00000282050	ATP5A1	20542
ENSP00000382423	MAP3K1	20526
ENSP00000329418	SOCS1	20432
ENSP00000309913	TBX5	20342
ENSP00000350616	DDC	20329
ENSP00000265070	GOLPH3	20309
ENSP00000358424	HSD3B2	20308
ENSP00000265062	RAB7A	20263
ENSP00000373918	GARS	20256
ENSP00000394624	OPRM1	20239
ENSP00000229304	APOBEC1	20234
ENSP00000225614	GALK1	20221
ENSP00000348965	DYNC1H1	20204
ENSP00000318318	MPI	20198
ENSP00000237596	PKD2	20162
ENSP00000349078	FDPS	20115
ENSP00000312981	USP39	20107
ENSP00000260950	MSTN	20075
ENSP00000005226	USH1C	20061
ENSP00000225698	C1QBP	20015
ENSP00000419879	CDS2	20012
ENSP00000349415	RAB18	19974
ENSP00000230340	BYSL	19968
ENSP00000336702	EIF5A	19952
ENSP00000332258	DGAT1	19921
ENSP00000333568	PRKD1	19906
ENSP00000340305	UBE2V1	19886
ENSP00000026218	PIGQ	19885
ENSP00000362261	TRAPPC3	19865
ENSP00000414598	MRVI1	19859
ENSP00000310305	P2RY2	19857
ENSP00000364591	TSPYL2	19852
ENSP00000345530	NEDD4	19847
ENSP00000282999	SRP19	19845
ENSP00000361298	KIF2C	19838
ENSP00000353731	DPP4	19838
ENSP00000228945	ARHGDIB	19835
ENSP00000258317	NPL	19826
ENSP00000199280	AQP2	19822
ENSP00000308165	CD36	19808
ENSP00000356331	NR5A2	19806
ENSP00000053243	TNFRSF17	19799
ENSP00000378890	GCH1	19796
ENSP00000283875	GTF2E1	19784
ENSP00000262374	ALG1	19773
ENSP00000253408	GFAP	19755
ENSP00000327650	VPS33B	19745
ENSP00000295702	SSR2	19744
ENSP00000355279	CNOT7	19743
ENSP00000216456	VTI1B	19738
ENSP00000343657	MCCC2	19738
ENSP00000326649	HPS1	19737
ENSP00000340191	FPR2	19735
ENSP00000247655	COX7C	19734
ENSP00000403397	ZDHHC17	19731
ENSP00000377527	PC	19729
ENSP00000383977	TEK	19726
ENSP00000234677	SARS	19722
ENSP00000246672	NR1D1	19718
ENSP00000326432	CCR8	19715
ENSP00000379616	MYH11	19711
ENSP00000384442	CDK11A	19710
ENSP00000254231	LIN28A	19708
ENSP00000384708	FSHR	19704
ENSP00000292535	CUX1	19702
ENSP00000353362	CACNA1A	19702
ENSP00000215375	ATP5D	19701
ENSP00000376472	STT3A	19700
ENSP00000304736	ELOVL6	19699
ENSP00000242577	DYNLL1	19696
ENSP00000412283	IER3	19693
ENSP00000355140	HOXB1	19692
ENSP00000370083	SMN1	19692
ENSP00000347754	HTR3A	19692
ENSP00000201586	SULT2B1	19689
ENSP00000384259	ATG4B	19687
ENSP00000268704	SPG7	19686
ENSP00000242462	NEUROG3	19685
ENSP00000265293	WWC1	19683
ENSP00000239878	UFM1	19682
ENSP00000349204	CRB3	19681
ENSP00000327025	RORC	19681
ENSP00000298854	RAPSN	19680
ENSP00000362463	GLO1	19680
ENSP00000339186	GRAP2	19679
ENSP00000257245	TIMM10	19679
ENSP00000327652	DRD1	19678
ENSP00000348278	STK39	19678
ENSP00000401371	TIA1	19676
ENSP00000314709	ZHX2	19675
ENSP00000304802	DTYMK	19675
ENSP00000080059	HDAC7	19675
ENSP00000304941	TCTN2	19675
ENSP00000315112	RNF31	19675
ENSP00000327583	RANBP1	19675
ENSP00000239243	MSX2	19675
ENSP00000346148	PRKAA1	19675
ENSP00000253063	SESN2	19675
ENSP00000356234	KDM5B	19675
ENSP00000340671	DDIT3	19675
ENSP00000234626	CDC7	19675
ENSP00000310453	FNIP1	19674
ENSP00000263277	EHD2	19674
ENSP00000354398	CYTH1	19674
ENSP00000318585	BACE1	19674
ENSP00000333821	MC2R	19674
ENSP00000392330	BCAP31	19674
ENSP00000340989	SFN	19673
ENSP00000385000	KIF2A	19673
ENSP00000273783	EIF2B5	19673
ENSP00000360797	CARD9	19673
ENSP00000261180	TRHDE	19673
ENSP00000369131	SIN3B	19673
ENSP00000194530	STRADB	19673
ENSP00000296754	ERAP1	19673
ENSP00000345719	TOR1A	19673
ENSP00000345333	ZNF69	19673
ENSP00000368924	TFAP2A	19673
ENSP00000216200	PVALB	19673
ENSP00000287295	AIFM1	19673
ENSP00000308620	RAG2	19673
ENSP00000295400	TGFA	19672
ENSP00000229268	USP5	19672
ENSP00000261454	PROX1	19672
ENSP00000365576	UBQLN1	19671
ENSP00000297373	PHKG1	19671
ENSP00000310557	KCNE3	19671
ENSP00000333266	UBA7	19671
ENSP00000395653	SLC46A1	19671
ENSP00000417132	BAP1	19671
ENSP00000355988	IRF6	19670
ENSP00000325312	METAP2	19670
ENSP00000377941	ACTN1	19670
ENSP00000237289	TNFAIP3	19670
ENSP00000304250	CDK5R2	19670
ENSP00000313007	PABPC1	19670
ENSP00000341138	EPB41L3	19670
ENSP00000322804	MTSS1	19670
ENSP00000349275	NRG1	19670
ENSP00000253003	ADRM1	19670
ENSP00000342112	LMO7	19670
ENSP00000264731	TP63	19669
ENSP00000225402	AATF	19669
ENSP00000282077	PDK1	19669
ENSP00000300408	PHB	19669
ENSP00000221419	HNRNPL	19669
ENSP00000241453	FLT3	19669
ENSP00000219343	SLC7A6	19668
ENSP00000345826	PMEPA1	19668
ENSP00000265727	ADAM22	19668
ENSP00000363826	FZD8	19668
ENSP00000291688	MCM3AP	19668
ENSP00000215574	CDC34	19668
ENSP00000324304	TSPAN4	19668
ENSP00000262539	PTPN3	19668
ENSP00000286070	RBM45	19667
ENSP00000356641	RFWD2	19667
ENSP00000263102	CCDC6	19667
ENSP00000356579	CEP350	19667
ENSP00000324573	FLII	19667
ENSP00000354201	UBE2Z	19667
ENSP00000269468	MBD1	19667
ENSP00000297157	RP9	19667
ENSP00000275815	EPHA1	19667
ENSP00000364235	RNF5	19667
ENSP00000417963	PPP2R5D	19667
ENSP00000264674	MECOM	19666
ENSP00000371328	KLRC3	19666
ENSP00000298472	SLC18A2	19666
ENSP00000302719	KCNAB3	19666
ENSP00000302625	AXIN2	19666
ENSP00000295685	ARPC2	19665
ENSP00000284957	RABGEF1	19665
ENSP00000353582	NRP2	19665
ENSP00000334538	SREK1	19665
ENSP00000316779	BIN1	19665
ENSP00000325120	PGR	19665
ENSP00000419449	EIF1	19665
ENSP00000349436	ADAM15	19664
ENSP00000264193	CPOX	19664
ENSP00000266058	SLIT1	19664
ENSP00000259021	KAT7	19663
ENSP00000390500	STK3	19663
ENSP00000269228	NPC1	19663
ENSP00000364699	SDHD	19663
ENSP00000262646	RAB2A	19662
ENSP00000396439	RING1	19662
ENSP00000362092	RRAGC	19661
ENSP00000259469	RPL35	19661
ENSP00000325589	PTPRCAP	19661
ENSP00000234091	ID2	19661
ENSP00000323822	FBXO11	19661
ENSP00000165698	REEP1	19661
ENSP00000262225	TMED2	19660
ENSP00000367766	RPGR	19660
ENSP00000263826	AKT3	19660
ENSP00000355645	ACTA1	19659
ENSP00000207870	XYLB	19659
ENSP00000220959	UBR5	19659
ENSP00000374409	PKP4	19659
ENSP00000346667	WNK3	19658
ENSP00000332931	SLC8A1	19658
ENSP00000388191	ZBTB22	19658
ENSP00000302676	GPR22	19658
ENSP00000280904	DSC2	19657
ENSP00000370979	CRLF2	19657
ENSP00000338413	UBA1	19656
ENSP00000265441	WNT2	19656
ENSP00000332296	RARB	19656
ENSP00000377865	RPL23	19656
ENSP00000324560	ULK1	19655
ENSP00000297290	BRI3	19654
ENSP00000268099	SCAMP2	19654
ENSP00000352144	B4GALT4	19654
ENSP00000347792	SYNJ2	19654
ENSP00000309338	CLCF1	19654
ENSP00000231368	LNPEP	19653
ENSP00000212369	SH3GLB1	19653
ENSP00000264161	DARS	19653
ENSP00000261751	CHRNB4	19652
ENSP00000326604	LMBR1	19652
ENSP00000315212	RNF4	19651
ENSP00000338648	MS4A4A	19651
ENSP00000319984	CHRM2	19651
ENSP00000362353	GLP1R	19650
ENSP00000372005	DNAJC19	19650
ENSP00000181839	CDK13	19649
ENSP00000262794	MOV10L1	19649
ENSP00000368350	TPT1	19648
ENSP00000379441	JMY	19647
ENSP00000388001	OAS1	19646
ENSP00000308741	CLOCK	19646
ENSP00000339299	TRIO	19644
ENSP00000269280	NLRP1	19644
ENSP00000263346	TCF25	19644
ENSP00000260731	KIF11	19643
ENSP00000288071	DDX19B	19643
ENSP00000382714	IFITM2	19643
ENSP00000217446	PIGU	19642
ENSP00000295924	TIPARP	19642
ENSP00000319690	HNRNPC	19642
ENSP00000246117	NCLN	19639
ENSP00000261693	SCARB1	19639
ENSP00000258449	TGFBRAP1	19638
ENSP00000381891	ERG	19637
ENSP00000349508	CHD4	19636
ENSP00000355920	SLC22A2	19635
ENSP00000369638	SNX1	19635
ENSP00000226299	LAP3	19635
ENSP00000349393	LIG4	19635
ENSP00000363036	FBXW2	19635
ENSP00000412922	URM1	19634
ENSP00000205214	AASDH	19633
ENSP00000359151	DBT	19630
ENSP00000372873	FLOT1	19630
ENSP00000361895	MFSD2A	19629
ENSP00000287766	SLC6A1	19628
ENSP00000356489	EPM2A	19627
ENSP00000363965	ALPL	19626
ENSP00000226725	KLHL2	19619
ENSP00000216211	UPK3A	19616
ENSP00000367459	KIAA0319	19615
ENSP00000369411	RFC3	19615
ENSP00000325421	PARL	19615
ENSP00000363435	ITPR3	19613
ENSP00000381333	CRHR1	19611
ENSP00000391397	MT1G	19609
ENSP00000357022	SLAMF7	19608
ENSP00000265104	DNAH5	19604
ENSP00000010338	TRAF3IP3	19604
ENSP00000375986	MAP3K4	19602
ENSP00000300231	MAP1A	19599
ENSP00000264025	PVRL1	19593
ENSP00000386050	RPS6KA2	19590
ENSP00000373992	POU2F2	19589
ENSP00000388000	EGFL8	19589
ENSP00000259089	BLK	19588
ENSP00000366453	TJP2	19586
ENSP00000350310	ATP2B4	19585
ENSP00000221466	FCGRT	19583
ENSP00000342136	CREB3	19579
ENSP00000302811	MTNR1A	19577
ENSP00000363559	EIF6	19575
ENSP00000260372	HAUS2	19573
ENSP00000232607	UMPS	19572
ENSP00000364475	FBP1	19570
ENSP00000333142	PLA2G6	19557
ENSP00000365280	ID1	19554
ENSP00000365877	SUV39H1	19552
ENSP00000310933	MADD	19550
ENSP00000286298	SLC26A2	19540
ENSP00000346151	MAGI2	19537
ENSP00000360316	DHCR24	19535
ENSP00000311538	ARR3	19531
ENSP00000270861	PLK4	19529
ENSP00000005587	SKAP2	19524
ENSP00000355601	EGLN1	19522
ENSP00000274353	BHMT	19520
ENSP00000299565	CHRNA5	19511
ENSP00000232424	HES1	19510
ENSP00000375855	PDC	19509
ENSP00000264709	DNMT3A	19501
ENSP00000341682	SLC26A9	19496
ENSP00000230882	GHR	19491
ENSP00000254079	PPP1R1B	19484
ENSP00000357301	RXFP4	19475
ENSP00000231061	SPARC	19471
ENSP00000267842	SLC27A2	19465
ENSP00000319705	DUOXA2	19462
ENSP00000353804	ACSS2	19456
ENSP00000257192	DSG1	19448
ENSP00000347979	FAS	19439
ENSP00000387911	PARN	19428
ENSP00000264670	NSUN2	19425
ENSP00000399511	TNIK	19417
ENSP00000362946	RAB14	19398
ENSP00000226279	CD38	19393
ENSP00000286452	KIF5A	19369
ENSP00000343027	GNAI1	19360
ENSP00000336565	ZNF446	19357
ENSP00000319141	CYBRD1	19354
ENSP00000322234	SYNJ1	19343
ENSP00000254301	LGALS3	19337
ENSP00000295522	CLDN1	19312
ENSP00000337224	LRAT	19264
ENSP00000232375	PFKFB4	19231
ENSP00000217086	SALL4	19212
ENSP00000229266	CHPT1	19196
ENSP00000378857	WDR6	19090
ENSP00000371888	MLST8	19082
ENSP00000252242	KRT5	19072
ENSP00000328973	TSPO	19069
ENSP00000357283	LMNA	19048
ENSP00000249910	MBD4	19024
ENSP00000362937	RCC1	19018
ENSP00000200457	TRIP6	19012
ENSP00000418070	PVRL3	18969
ENSP00000357721	S100A8	18904
ENSP00000358323	TXNIP	18893
ENSP00000289081	FANCC	18864
ENSP00000230510	TTK	18803
ENSP00000298687	NDRG2	18745
ENSP00000319977	NDRG1	18703
ENSP00000380414	DEK	18702
ENSP00000245912	TNFSF14	18621
ENSP00000260585	EPT1	18594
ENSP00000250144	MMP28	18575
ENSP00000257963	ACVR1B	18509
ENSP00000366396	XRN2	18399
ENSP00000369257	RPGRIP1L	18390
ENSP00000368698	HIVEP1	18348
ENSP00000320516	EHD1	18327
ENSP00000365435	TNFRSF1B	18166
ENSP00000327048	MAF	18061
ENSP00000342889	POLR2K	17926
ENSP00000361446	POLR3A	17881
ENSP00000307288	MCM7	17880
ENSP00000256759	FST	17772
ENSP00000259486	ENPP2	17600
ENSP00000298130	SPTSSA	17262
ENSP00000300161	YWHAB	17242
ENSP00000005340	DVL2	17184
ENSP00000311888	MGAT1	17155
ENSP00000384053	CSF2RB	17130
ENSP00000233154	NCK2	17058
ENSP00000343741	ATR	17042
ENSP00000355493	ADSS	16977
ENSP00000233114	MDH1	16934
ENSP00000295025	REL	16749
ENSP00000262461	SLC12A2	16655
ENSP00000309591	PRKACA	16567
ENSP00000245960	CDC25B	16541
ENSP00000235090	WDR77	16270
ENSP00000320493	TRIP10	16108
ENSP00000384179	ZFPM2	16040
ENSP00000362820	SRSF3	15976
ENSP00000222330	GSK3A	15952
ENSP00000360621	ORC1	15737
ENSP00000189444	NFKB2	15689
ENSP00000320886	MLXIPL	15653
ENSP00000366797	SLC22A12	15609
ENSP00000328150	KCNJ12	15558
ENSP00000378332	TGFB1I1	15395
ENSP00000258443	EDAR	15194
ENSP00000319169	PRMT5	15060
ENSP00000251772	PLXNA1	14944
ENSP00000265148	CENPE	14904
ENSP00000351697	REV3L	14765
ENSP00000294304	LRP5	14733
ENSP00000352138	KIRREL	14295
ENSP00000380073	IRF9	14253
ENSP00000354859	DRD2	14208
ENSP00000358105	APH1A	14106
ENSP00000257430	APC	13922
ENSP00000380066	MAP4K1	13861
ENSP00000260795	FGFR3	13854
ENSP00000348573	AKAP9	13805
ENSP00000354961	MT-ND4	13767
ENSP00000224073	EDF1	13677
ENSP00000262033	PTGES3	13607
ENSP00000337168	EPB41L1	13523
ENSP00000361266	PTCH2	13446
ENSP00000385143	UNC5D	13343
ENSP00000341268	TRADD	13283
ENSP00000366843	ATXN2	13186
ENSP00000320604	C5orf4	13182
ENSP00000401445	ERN1	13138
ENSP00000246657	CCR7	12997
ENSP00000361845	ZMPSTE24	12823
ENSP00000361965	ADA	12814
ENSP00000375809	ERCC2	12808
ENSP00000416387	FBLIM1	12778
ENSP00000216194	ADSL	12545
ENSP00000307423	MGAT2	12448
ENSP00000380702	MYCBP	12426
ENSP00000288840	SMAD6	12396
ENSP00000316746	PRF1	12355
ENSP00000238682	TGFB3	12273
ENSP00000265963	GTF2H1	12047
ENSP00000382562	MAD1L1	12044
ENSP00000261424	RFC1	12032
ENSP00000298171	TSHR	11918
ENSP00000357255	BGLAP	11848
ENSP00000323036	ACPP	11694
ENSP00000233025	SPCS1	11556
ENSP00000013034	NME1	11474
ENSP00000261908	NEO1	11425
ENSP00000308021	CEP290	11375
ENSP00000337736	AKAP1	11325
ENSP00000379213	PTHLH	11297
ENSP00000264938	SLC9A3	11291
ENSP00000351409	CELF1	11239
ENSP00000342385	PTGES	11214
ENSP00000355599	TSNAX	11200
ENSP00000307188	ASL	11165
ENSP00000306157	IL7R	11106
ENSP00000355136	SORBS1	11071
ENSP00000361818	SDC4	10992
ENSP00000355261	SMG5	10989
ENSP00000391069	SRPK1	10982
ENSP00000221233	EXOSC5	10930
ENSP00000360216	DNTT	10852
ENSP00000364336	TBXA2R	10842
ENSP00000345752	MTMR2	10814
ENSP00000315147	ISYNA1	10802
ENSP00000264568	BMPR1B	10792
ENSP00000355566	TOMM20	10780
ENSP00000309629	CFL1	10751
ENSP00000291552	U2AF1	10669
ENSP00000323046	EXOSC3	10652
ENSP00000370023	HADHA	10617
ENSP00000324464	CSNK1D	10599
ENSP00000263026	EEF2K	10570
ENSP00000320758	NOS1	10543
ENSP00000372860	VARSL	10539
ENSP00000320566	ING3	10522
ENSP00000340019	HSPD1	10508
ENSP00000401802	PSMC6	10441
ENSP00000340797	TRIM3	10435
ENSP00000381590	ATXN7	10427
ENSP00000225964	COL1A1	10409
ENSP00000379612	TAX1BP1	10405
ENSP00000221130	GSR	10384
ENSP00000367102	SLC22A6	10346
ENSP00000276079	NONO	10321
ENSP00000249750	ALDH1A2	10278
ENSP00000406288	CHD8	10251
ENSP00000171887	TNS1	10248
ENSP00000261965	TUBGCP3	10246
ENSP00000317578	ADRBK2	10244
ENSP00000296577	ABCE1	10230
ENSP00000326806	NCBP2	10217
ENSP00000343885	PPA2	10202
ENSP00000343412	BRE	10196
ENSP00000265351	XPO5	10193
ENSP00000356515	UTRN	10183
ENSP00000265724	ABCB1	10169
ENSP00000310688	ABCD2	10169
ENSP00000291670	FTCD	10150
ENSP00000390475	CXXC1	10150
ENSP00000360183	STX16	10143
ENSP00000233946	IL1R1	10142
ENSP00000340935	DMP1	10131
ENSP00000413254	RPH3A	10127
ENSP00000300413	SNRPD1	10122
ENSP00000417864	ANP32A	10108
ENSP00000312029	UCP2	10103
ENSP00000260363	KIF23	10101
ENSP00000351170	GDA	10093
ENSP00000363458	LDLRAP1	10087
ENSP00000327077	PCM1	10084
ENSP00000367959	HTR2A	10074
ENSP00000343040	HMGB1	10069
ENSP00000217381	SNTA1	10063
ENSP00000293217	ACOX1	10050
ENSP00000361381	SLC6A9	10042
ENSP00000382177	MYO5A	10041
ENSP00000318142	FUT7	10035
ENSP00000301012	MVD	10025
ENSP00000304858	ORMDL3	10023
ENSP00000384573	DAZ1	10023
ENSP00000210444	NANS	10022
ENSP00000217386	OXT	10013
ENSP00000219548	STUB1	10005
ENSP00000420040	KCNIP2	10005
ENSP00000244763	SSR1	10004
ENSP00000334373	KPNA4	10000
ENSP00000236067	ATP6V0B	9998
ENSP00000360125	PGM1	9995
ENSP00000368349	POLA1	9992
ENSP00000364721	MAPRE1	9990
ENSP00000262948	MAP2K2	9990
ENSP00000356015	ACAT2	9990
ENSP00000332116	PDE4B	9989
ENSP00000397181	RGS4	9985
ENSP00000296589	SLC45A2	9984
ENSP00000389998	TMEM67	9978
ENSP00000334329	UNC5B	9978
ENSP00000263119	CABIN1	9977
ENSP00000359285	CHRNA4	9974
ENSP00000347717	DHCR7	9973
ENSP00000411286	GABBR1	9968
ENSP00000360939	CMPK1	9967
ENSP00000339393	CCR6	9962
ENSP00000349595	ATP2A1	9960
ENSP00000269848	PFKL	9960
ENSP00000361475	NCS1	9955
ENSP00000219479	NME4	9946
ENSP00000402608	CPS1	9941
ENSP00000359976	CTH	9939
ENSP00000357727	S100A9	9938
ENSP00000320376	P2RY13	9935
ENSP00000359233	ABCD3	9934
ENSP00000305603	FUT3	9932
ENSP00000266483	ALG10	9932
ENSP00000290378	ACTC1	9929
ENSP00000353701	DPP3	9927
ENSP00000372654	AQP4	9925
ENSP00000366488	PRKACG	9924
ENSP00000349594	ELAVL4	9921
ENSP00000353515	ZNF461	9919
ENSP00000339122	C14orf133	9919
ENSP00000316121	CDCA8	9917
ENSP00000376776	DBH	9914
ENSP00000261507	MSMO1	9908
ENSP00000357882	PSTK	9903
ENSP00000265368	SYNE1	9897
ENSP00000381097	EPHB1	9896
ENSP00000367086	ACOT7	9895
ENSP00000409275	COQ2	9893
ENSP00000357048	COPA	9891
ENSP00000263969	MFN1	9889
ENSP00000369456	ITPA	9889
ENSP00000351755	LPAR1	9887
ENSP00000296273	RFC4	9886
ENSP00000265094	FBXW11	9884
ENSP00000216951	GSS	9884
ENSP00000269195	GALNT1	9883
ENSP00000417656	COX7B	9882
ENSP00000345096	IMPDH1	9880
ENSP00000339399	CRYZ	9880
ENSP00000320239	TRPM7	9879
ENSP00000304915	IL13	9879
ENSP00000367029	POLR1E	9878
ENSP00000322427	ZNF611	9878
ENSP00000217233	TRIB3	9878
ENSP00000356975	ADAMTS4	9876
ENSP00000253792	ACLY	9876
ENSP00000278823	MTA2	9875
ENSP00000159060	NOX3	9875
ENSP00000219240	DHODH	9873
ENSP00000166244	EPHA8	9872
ENSP00000355809	ENAH	9872
ENSP00000281923	MGAT5	9870
ENSP00000337722	ARL6	9870
ENSP00000262056	EIF4B	9868
ENSP00000370381	SLC12A1	9868
ENSP00000351492	UBL5	9866
ENSP00000336630	ADORA2A	9865
ENSP00000308208	MMP14	9864
ENSP00000193322	OSTM1	9864
ENSP00000306881	SEC23A	9864
ENSP00000382373	DAZL	9864
ENSP00000261070	COX17	9863
ENSP00000261381	XYLT1	9863
ENSP00000351832	RAB3GAP2	9863
ENSP00000356825	ADCY10	9862
ENSP00000260130	SDCBP	9862
ENSP00000260302	MMP13	9862
ENSP00000231572	RARS	9861
ENSP00000316786	HSD11B2	9861
ENSP00000216479	AHSA1	9860
ENSP00000258654	COG3	9858
ENSP00000256433	IER3IP1	9858
ENSP00000364554	SCN1A	9857
ENSP00000245816	CLPP	9856
ENSP00000309595	C10orf2	9856
ENSP00000331867	TAS1R1	9856
ENSP00000366273	ZNF157	9855
ENSP00000238918	BAI3	9855
ENSP00000246166	FNTB	9855
ENSP00000379839	GNE	9855
ENSP00000347684	LMX1B	9854
ENSP00000204566	SPG21	9854
ENSP00000344193	RNASE1	9854
ENSP00000333950	FMN1	9853
ENSP00000353608	DSC3	9853
ENSP00000315768	STAT2	9851
ENSP00000362576	YARS	9851
ENSP00000329797	CADM1	9850
ENSP00000317997	DUOX1	9849
ENSP00000358931	TKTL1	9849
ENSP00000382392	NOP2	9849
ENSP00000341785	ADIPOR1	9848
ENSP00000335610	QRFPR	9848
ENSP00000255189	DMGDH	9848
ENSP00000366221	CASZ1	9848
ENSP00000349085	MAGEA1	9847
ENSP00000286398	SMC2	9847
ENSP00000370779	GPR139	9847
ENSP00000377867	MST4	9847
ENSP00000365811	SPAG6	9847
ENSP00000381031	EWSR1	9847
ENSP00000354159	NLRC4	9846
ENSP00000323527	MKLN1	9846
ENSP00000293778	CXCL16	9846
ENSP00000370543	SLC5A3	9846
ENSP00000377141	ARRB1	9846
ENSP00000376384	GPR123	9845
ENSP00000324105	ENO3	9845
ENSP00000370115	SERPINB1	9845
ENSP00000289893	MACF1	9845
ENSP00000264637	THRA	9845
ENSP00000357292	UBQLN4	9845
ENSP00000264234	UPK1B	9844
ENSP00000298282	PKNOX2	9844
ENSP00000311713	OXSR1	9844
ENSP00000328858	PYCR1	9843
ENSP00000359211	DPYD	9843
ENSP00000393557	SLC4A4	9842
ENSP00000336725	DDX3Y	9842
ENSP00000263985	PET112	9842
ENSP00000357905	DMBT1	9842
ENSP00000291554	CRYAA	9842
ENSP00000351209	EPHA2	9841
ENSP00000329757	ATP6V0C	9841
ENSP00000235628	NT5C1A	9841
ENSP00000271357	GPR161	9841
ENSP00000365441	CACNA1F	9841
ENSP00000390590	DDN	9840
ENSP00000254250	THAP1	9840
ENSP00000235329	MFN2	9840
ENSP00000218340	RP2	9840
ENSP00000349351	BICD2	9840
ENSP00000367276	CKAP2	9840
ENSP00000348472	PXK	9840
ENSP00000349208	PIWIL2	9840
ENSP00000360034	SERBP1	9840
ENSP00000358360	PDE4DIP	9840
ENSP00000306522	CAMTA1	9840
ENSP00000359790	DST	9840
ENSP00000354665	MT-ND6	9840
ENSP00000227638	PANX1	9840
ENSP00000280700	NGLY1	9839
ENSP00000376946	BBS10	9839
ENSP00000261211	CDK17	9839
ENSP00000334314	EML1	9839
ENSP00000307208	BPTF	9839
ENSP00000232854	HEMK1	9839
ENSP00000265708	ADAM2	9839
ENSP00000245551	MIF4GD	9839
ENSP00000400842	HLA-B	9839
ENSP00000380557	AKAP8L	9838
ENSP00000369318	RHOBTB3	9838
ENSP00000261386	GDE1	9838
ENSP00000349748	SFPQ	9838
ENSP00000253680	HSH2D	9838
ENSP00000337056	CDKN2D	9838
ENSP00000352995	ARHGEF18	9838
ENSP00000262375	DNAJA3	9838
ENSP00000228606	CYP27B1	9838
ENSP00000328088	PAWR	9838
ENSP00000225245	CCL3	9838
ENSP00000261461	PPP2R5A	9838
ENSP00000345512	SEMA6A	9838
ENSP00000325618	PARP10	9838
ENSP00000253801	G6PC	9838
ENSP00000366565	VPS28	9838
ENSP00000303423	FNTA	9838
ENSP00000327824	IL28RA	9838
ENSP00000230056	GMNN	9838
ENSP00000352839	NPSR1	9838
ENSP00000263791	EIF2AK4	9838
ENSP00000266481	DNM1L	9838
ENSP00000366283	SLITRK5	9838
ENSP00000216267	BRD1	9838
ENSP00000288602	BRAF	9838
ENSP00000334003	INTU	9838
ENSP00000260743	CALHM2	9838
ENSP00000296098	TRIM54	9838
ENSP00000310520	ERCC4	9838
ENSP00000264399	PRKG2	9838
ENSP00000353099	HLA-DRB1	9838
ENSP00000283943	TRIP12	9838
ENSP00000285071	FLCN	9838
ENSP00000298048	MELK	9838
ENSP00000302846	PTGER4	9838
ENSP00000363064	ZNF76	9838
ENSP00000316950	MYEF2	9838
ENSP00000285896	CNOT8	9838
ENSP00000328494	KIF21B	9838
ENSP00000261332	ZNF24	9838
ENSP00000343619	HOXA9	9838
ENSP00000363021	RPA2	9838
ENSP00000266458	GABARAPL1	9838
ENSP00000304102	COPS6	9838
ENSP00000255559	SLC39A11	9838
ENSP00000344331	FAM69C	9838
ENSP00000278243	PGAP2	9838
ENSP00000282928	ZIC1	9838
ENSP00000362205	TREM2	9838
ENSP00000373169	DRD3	9838
ENSP00000322280	CLRN1	9838
ENSP00000289746	CDH15	9838
ENSP00000298767	WAPAL	9838
ENSP00000278175	ADM	9838
ENSP00000307340	SPRR1A	9838
ENSP00000331871	RHD	9838
ENSP00000336712	TNPO1	9838
ENSP00000264126	GPSM2	9838
ENSP00000283243	PLA2R1	9838
ENSP00000322016	PUF60	9838
ENSP00000222547	BET1	9838
ENSP00000373700	ALK	9838
ENSP00000254661	RAMP1	9838
ENSP00000264042	FARP2	9838
ENSP00000378856	LGALS9	9838
ENSP00000263955	STK17B	9838
ENSP00000352271	XRCC2	9838
ENSP00000273986	CISD2	9838
ENSP00000262178	VIPR2	9838
ENSP00000261714	BLMH	9838
ENSP00000359368	RPAP2	9838
ENSP00000374584	TEX14	9838
ENSP00000348838	UBE2C	9838
ENSP00000366098	YIF1A	9838
ENSP00000345001	CRTC1	9838
ENSP00000316589	RANBP10	9838
ENSP00000260665	LRPPRC	9838
ENSP00000351884	SPANXC	9838
ENSP00000326884	ARFRP1	9838
ENSP00000307183	ING2	9838
ENSP00000378723	HLA-DMB	9838
ENSP00000380431	ARPC4	9838
ENSP00000248975	YWHAH	9838
ENSP00000261798	CSNK1A1	9838
ENSP00000316357	USP9X	9838
ENSP00000261845	MAPK6	9838
ENSP00000222008	RABAC1	9838
ENSP00000280154	PDCD4	9838
ENSP00000242776	DDX39A	9838
ENSP00000318861	SF3B2	9838
ENSP00000386653	PCDH20	9838
ENSP00000309570	KLF7	9838
ENSP00000370912	TEC	9838
ENSP00000318914	PNMA1	9838
ENSP00000260643	PREB	9838
ENSP00000160827	KIF22	9838
ENSP00000318409	TMEM176B	9838
ENSP00000368565	DNAJC2	9838
ENSP00000360305	PDLIM1	9838
ENSP00000269097	G6PC3	9838
ENSP00000217133	TUBB1	9838
ENSP00000258947	CALCOCO2	9838
ENSP00000279441	MMP10	9838
ENSP00000364289	NCBP1	9838
ENSP00000361310	POLH	9838
ENSP00000324438	RPS21	9838
ENSP00000301464	IGFBP6	9838
ENSP00000265715	SLC26A4	9838
ENSP00000355308	PTPLA	9838
ENSP00000364550	KDM5C	9838
ENSP00000331288	TMEM173	9838
ENSP00000263207	ARVCF	9838
ENSP00000312455	CFLAR	9838
ENSP00000227471	UNC93B1	9838
ENSP00000263281	GIPR	9838
ENSP00000384084	DTNB	9838
ENSP00000306397	UQCRFS1	9838
ENSP00000347170	NEIL1	9838
ENSP00000265965	SERGEF	9838
ENSP00000366934	NOL9	9838
ENSP00000364403	UBR4	9838
ENSP00000355517	KMO	9838
ENSP00000265598	LAMP3	9838
ENSP00000378394	PSAP	9838
ENSP00000299767	HSP90B1	9838
ENSP00000288422	TAB3	9838
ENSP00000272771	TMEFF2	9838
ENSP00000330694	NDNL2	9838
ENSP00000242067	BBS9	9838
ENSP00000384850	UNKL	9838
ENSP00000355884	MARK1	9838
[truncated: 7,848 more rows]
