# Supplementary material for: Identification of Influenza A/H7N9 Virus Infection-Related Human Genes Based on Shortest Paths in a Virus-Human Protein Interaction Network
Source: Biomed Res Int. 2014 May 18;2014:239462. doi: 10.1155/2014/239462 (PMC4052153; doi:10.1155/2014/239462)
Supplement: Supplementary file 1 — Supporting Information S1: Sequences of the 11 non-homologous influenza A/H7N9 virus proteins downloaded from NCBI protein database, with pairwise sequence identity less than 40%. Supporting Information S2: The interacting influenza A/H7N9 virus-human protein pairs with their sharing GO terms. The interacting HRV-human and RSV-human protein pairs were also included respectively. Supporting Information S3: The 3,212 Target Human Proteins interacted with influenza A/H7N9 virus proteins, found based on sharing GO terms. The Target Human Proteins interacted with HRV and RSV viruses were also included respectively. Supporting Information S4: The 962 shortest path human proteins picked out on shortest paths for influenza A/H7N9 virus. The shortest path human proteins for HRV and RSV viruses were also included respectively. Supporting Information S5: Sequences of the 4 non-homologous Human Rhinovirus (HRV) proteins downloaded from NCBI protein database, with pairwise sequence identity less than 40%. Supporting Information S6: Sequences of the 22 non-homologous Respiratory Syncytical Virus (RSV) proteins downloaded from NCBI protein database, with pairwise sequence identity less than 40%. [file 239462.f1.zip › Supporting Information/Supporting Information S5.fasta]

>gi|61083|emb|CAA25565.1|
MGAQVSTQKSGSHENQNILTNGSNQTFTVINYYKDAASTSSAGQSLSMDPSKFTEPVKDLMLKGAPALNS
PNVEACGYSDRVQQITLGNSTITTQEAANAVVCYAEWPEYLPDVDASDVNKTSKPDTSVCRFYTLDSKTW
TTGSKGWCWKLPDALKDMGVFGQNMFFHSLGRSGYTVHVQCNATKFHSGCLLVVVIPEHQLASHEGGNVS
VKYTFTHPGERGIDLSSANEVGGPVKDVIYNMNGTLLGNLLIFPHQFINLRTNNTATIVIPYINSVPIDS
MTRHNNVSLMVIPIAPLTVPTGATPSLPITVTIAPMCTEFSGIRSKSIVPQGLPTTTLPGSGQFLTTDDR
QSPSALPNYEPTPRIHIPGKVHNLLEIIQVDTLIPMNNTHTKDEVNSYLIPLNANRQNEQVFGTNLFIGD
GVFKTTLLGEIVQYYTHWSGSLRFSLMYTGPALSSAKLILAYTPPGARGPQDRREAMLGTHVVWDIGLQS
TIVMTIPWTSGVQFRYTDPDTYTSAGFLSCWYQTSLILPPETTGQVYLLSFISACPDFKLRLMKDTQTIS
QTVALTEGLGDELEEVIVEKTKQTVASISSGPKHTQKVPILTANETGATMPVLPSDSIETRTTYMHFNGS
ETDVECFLGRAACVHVTEIQNKDATGIDNHREAKLFNDWKINLSSLVQLRKKLELFTYVRFDSEYTILAT
ASQPDSANYSSNLVVQAMYVPPGAPNPKEWDDYTWQSASSPSVFFKVGDTSRLSVPYVGLASAYNCFYDG
YSHDDAETQYGITVLNHMGSMAFRIVNEHDEHKTLVKIRVYHRAKHVEAWIPRAPRALPYTSIGRTNYPK
NTEPVIKKRKGDIKSYGLGPRYGGIYTSNVKIMNYHLMTPEDHHNLIAPYPNRDLAIVSTGGHGAETIPH
CNCTSGVYYSTYYRKYYPIICEKPTNIWIEGNPYYPSRFQAGVMKGVGPAEPGDCGGILRCIHGPIGLLT
AGGSGYVCFADIRQLECIAEEQGLSDYITGLGRAFGVGFTDQISTKVTELQEVAKDFLTTKVLSKVVKMV
SALVIICRNHDDLVTVTATLALLGCDGSPWRFLKMYISKHFQVPYIERQANDGWFRKFNDACNAAKGLEW
IANKISKLIEWIKNKVLPQAKEKLEFCSKLKQLDILERQITTMHISNPTQEKREQLFNNVLWLEQMSQKF
APLYAVESKRIRELKNKMVNYMQFKSKQRIEPVCVLIHGTPGSGKSLTTSIVGRAIAEHFNSAVYSLPPD
PKHFDGYQQQEVVIMDDLNQNPDGQDISMFCQMVSSVDFLPPMASLDNKGMLFTSNFVLASTNSNTLSPP
TILNPEALVRRFGFDLDICLHTTYTKNGKLNAGMSTKTCKDCHQPSNFKKCCPLVCGKAISLVDRTTNIR
YSVDQLVTAIISDFKSKMQITDSLETLFQGPVYKDLEIDVCNTPPPECINDLLKSVDSEEIREYCKKKKW
IIPEIPTNIERAMNQASMIINTILMFVSTLGIVYVIYKLFAQTQGPYSGNPPHNKLKAPTLRPVVVQGPN
TEFALSLLRKNIMTITTSKGEFTGLGIHDRVCVIPTHAQPGDDVLVNGQKIRVKDKYKLVDPENINLELT
VLTLDRNEKFRDIRGFISEDLEGVDATLVVHSNNFTNTILEVGPVTMAGLINLSSTPTNRMIRYDYATKT
GQCGGVLCATGKIFGIHVGGNGRQGFSAQLKKQYFVEKQGQVIARHKVREFNINPVNTPTKSKLHPSVFY
DVFPGDKEPAVLSDNDPRLEVKLTESLFSKYKGNVNTEPTENMLVAVDHYAGQLLSLDIPTSELTLKEAL
YGVDGLEPIDITTSAGFPYVSLGIKKRDILNKETQDTEKMKFYLDKYGIDLPLVTYIKDELRSVDKVRLG
KSRLIEASSLNDSVNMRMKLGNLYKAFHQNPGVLTGSAVGCDPDVFWSVIPCLMDGHLMAFDYSNFDASL
SPVWFVCLEKVLTKLGFAGSSLIQSICNTHHIFRDEIYVVEGGMPSGCSGTSIFNSMINNIIIRTLILDA
YKGIDLDKLKILAYGDDLIVSYPYELDPQVLATLGKNYGLTITPPDKSETFTKMTWENLTFLKRYFKPDQ
QFPFLVHPVMPMKDIHESIRWTKDPKNTQDHVRSLCMLAWHSGEKEYNEFIQKIRTTDIGKCLILPEYSV
LRRRWLDLF

>gi|333980908|gb|AEG42385.1|
MGAQVSRQNVGTHSTQNSVSNGSSLNYFNINYFKDAASSGASRLDFSQDPSKFTDPVKDVLEKGIPTLQS
PTVEACGYSDRLIQITRGDSTITSQDIANAVVGYGVWPSYLTPDDATAIDKPTQPDTSSNRFYTLESRSW
TSSSSGWWWKLPDALKNMGIFGENMFYHFLGRSGYTIHVQCNSSKFHQGLLIVAAIPEHQLASATSGNVS
VGYNHTHPGEQGREVVPSRNSDDNKRPSDDSWLNFDGTLLGNLPIYPHQYINLRTNNSATLILPYVNAVP
MDSMLRHNNWSLVIIPICPLQVQAGGTNSIPITVSISPMFSEFSGPRNKVTFGTTEGLPVMLTPGSGQFL
TTDDTQSPSAFPYFHPTKEIFIPGQVRNLIEMCQVDTLIPVNNKEENVKSVNMYTVDLRTQTELAKEVFS
IPVDVASQPLATTLIGELASYYTHWTGSLRFSFMFCGSASSTLKLLIAYTPPGVGKPRSRREAMLGTHLV
WDVGLQSTASLVVPWVSASHFRFTTPDTYSSAGYITCWYQTNFVVPASTPDNAKMVCMVSACKDFCLRLA
RDTNLHMQEGVLTQNPVENYIDNVLNEVLVVPNIQPSSSVSSHSAPALDAAETGHTSSVQPEDMIETRYV
ITDQTRDETSIESFLGRSGCIAMIEFSTSSDKDEHDKIGKGFKTWKISLQEMAQIRRKYELFTYTRFDSE
ITIVTAAAVQGDDSGHVVLQFMYVPPGAPVPVKRDDYTWQSGTNASVFWQEGQPYPRFTIPFMSIASAYY
MFYDGYDGDNAASKYGSVVTNDMGTICVRIVTSNQKHDLNIVCRIYHKAKHIKAWCPRPPRAVPYQHTHS
TNYIPSKGEITTQIKTRPNVFTVGPSSMFVHVGNLIYRNLHLFNSTLDDSILVSYSSDLVIYRTNTEGDD
VIPNCDCTECTYYCHHKDRYFPIKVTPHDWYEIQESEYYPKHIQYNLLIGEGPCEPGDCGGKLLCKHGVI
GMITAGGDGHVAFINLRKFQCAEEQGLSDYVEHLGQVFGVGFVDSIKQQVNFINPTSKIGSKVIKWLLRI
VSAMIIMVRNSSDPQTIIATLTLLGCSGSPWRFLKEKLCAWLQLSYVHKQSDSWLKKFTEACNAARGLEW
IGQKISKFIDWIKSMLPQAQLKVDYLTKLKQLNLLEKQIETIRLAPANDQEKIFTEINTLHDLSLKFLPL
YASEARRIKNLYIKCSNIIKGGKRNEPVAVLIHGSPGTGKSLATSVLARMLTVETDIYSLPPDPKYFDGY
DQQSVVIMDDIMQNPSGEDMTLFCQMVSSVPFIPPMADLPDKGKPFTSKFVLASTNHTMLTPPTVSSLPA
MSRRFYFDLDIQVKKDYLLDGKLDIAKSFRPCDVNTKIGNAKCCPFICGKAVEFKDRNSCTTLSLSQLYN
HIKEEDKRRSSAAQAMEAIFQGIDLQSPPPPAIADLLRSVKTPEIIKYCQDNNWIVPAECSIERDLGIAN
MTIGIIANVVSIVGVIYIIYKLFCTLQGPYSGEPKPKSKAPERRVVTQGPEEEFGRSLLKHNCCIVTTDK
GKFTGLGIYDQVMVLPTHSDPGSEILVDGVKVKISDSYDLHNHEGVKLEITVVKLVRNEKFKDIRKYLPS
REDDYPACNLALLANQDEPTIINVGDAESYGNILLSGTNTARMIKYHYPTKAGYCGGVLYKVGSILGIHV
GGNGRDGFSAMLLKSYFGETQGLITKELPVSVKNLPSIHVSSKTRLQPSVFHDVFPGTKEPAVLSNNDPR
LETDFDTALFSKYKGNPACEVTTHMKIAVAHYAAQLSTLDINPQPLSLEESVFGIEGLEALDLNTSAGFP
YVSLGIKKKDLIDKKTKDITKLKKAIDKYGIDLPMVTFLKDELRKKEKIRDGKTRVIEANSVNDTVLFRS
VYGNLFSAFHKNPGIVTGSAVGCDPEIFWSTIPLMLDGECLMAFDYSNYDGSLHPVWFKCLSMLLEDIGF
SSQLINQICNSKHIYKSKYYEVEGGMPSGCAGTSIFNTMINNVIIRTLVLDAYKNIDLDKLKILAYGDDV
IFSYNFKLDMAVLAKEGEKYGLTITPADKSDTFQELTYKNVTFLKRGFRADERHSFLIHPTFPVAEIHDS
IRWTKNPSCMQEHVLSLCHLMWHNGKHTYQEFVKGIRSVSAGRALYIPAYEVLEYEWYEKF

>gi|355429265|gb|AER92564.1|
MGAQVSRQSVGSHETMIHAGTGAVVKYFNVNYYKDAASSGLTKQDFSQDPSKFTQPVADILTNPALMSPS
IEACGFSDRLKQITIGNSTITTQDAVNTIVAYGEWPSYLSDIDATSVDKPTHPETSSDRFYTLKSVTWEV
GSSGWWWKLPDCLRDMGVFGQNMYHHAMGRSGYIIHTQCNATKFHSGCLLVAVVPEHQLAYIGGDNTRVK
YKHTHPGELGHKIGSNSERGDNQPDENPFFNCNGTLLGNLTIFPHQLINLRTNNSSTIVVPYINCTPMDS
MLRHNNVSLVIVPICPLRAPATAPPTLPITISIAPIKSEFSGARQSAKAQGLPVRMPSGANQFMTTEDEQ
SPNILPSFHSTKQIHIPGEIKTIMDMARVDSFMPINNVNQSHTLGVYYITISNVNSERKILAIPLDMSNT
LFSTTLMGEVLNYYSNWSGSIKLTFFCVCDSFSTGKFLIAYTPPGADIPESRRDAMLGTHVVWDLGLQSS
CHLVVPWISSHFFRRTRKDNYTESGFVTLWHQTAFVSNGTSGSIMVTCSACSDMSVRMLRDTPMMKQEDD
ITQNPVEEFVEHTLKEVLVVPDTQASGPVHTTKPQALGAVEIGATADVGPETLIETRYVMNDNTNAEAAV
ENFLGRSALWANLRLDQGFRKWEINFQEYAQVRKKFEMFTYVRFDLEITIVTNNKGLMQIMFVPPGITPP
GGKDGREWDTASNPSVFFQPNSGFPRFTIPFTGLGSAYYMFYDGYDGTDDANINYGISLTNDMGTLCFRA
LDGTGASDIKVFGKPKHITAWIPRPPRATQYLHKFSTNYNKPKTSGSTELEPKHFFKYRQDITSITNLGP
SDMYVHTKEAIYKCAHLTEPNENTILLAISSDLQVDSTSIPGPDNIPTCDCTTGTYYCKSRDRYYPVNLT
HHSWYIIQESSYYPKHIQYDILIGEGPCSPGDCGGKLLCTHGTIGMVTAGGESHVAFIDLRNYSSLSEHQ
GITDYVTQLGNAFGDGFTSSIRETLVSACDVSDKLTGKIIKWTIRLISALSIIVRNSTDTPTVIATLALL
GCSGSPWRYLKDKVCKWLGIDPPPSRQSDSWLKKFTEFCNAARGLEWIGDKLSKFIDWLKGKILPTLRRK
SDTLKECKKIPLYKEQVKAFATASEEAQDELMVKVNKLEKGLQDLAPLYALEAKQVREMSRELQRMMCYK
KTHRTEPVCILLHGQPGCGKSLASKVIARGLTSESNVYSLPPDPKYFDGYNQQEVVIMDDVGQNPDGKDL
SLFCQMVSSTEFITPMANLEDKGRAFTSDYVIASTNMSVLTPPTVSSPEAIDRRFFLDCDVKIMPAYNTN
NLLNVAKALLPCTDCPKPEFYKQCCPLTCGKALILQNKRTKASYSINTVVQQLRQEKKNRKCVEHNLTAI
FQGLGDDSTPGFIIDLLSASKDPKVIEFCEKEGWIKQSRCSKIERDFNYAQYCINCVGSIILILGTVYAL
YKLMCIAQGPYTGLPQPKVRKPELRKAVIQGPEHEFGMALIKRNCHIATTDRGDFNLLGVYDNCAVIPTH
AQPEDTILIDGVETRILKQTIITDENDVDTEVTILWLDRNEKFRDIRRFIPDYQRDWQNMRLVTNVPKFP
MLDIEIGDVIPYGDINLSGNPTTRLLKYDYPTKPGQCGGVILNTGNIIGIHVGGNGRVGYCASLTKSYFA
SAQGEIVNKCKVQDVGLKPINTPEHSKLHPSVFYDIFPGEKEPAVLTQRDPRLETDLKTAVMSKYKGNVE
IEMSENIQIAVEHYSAQLFMLDINPEPISLEQAVYGMENLEPLDLTTSAGFPYVTMGVKKRDILNRNTRD
VTKLQHMIDTYGLDLPYVTYLKDELRAPAKVKAGKTRAIEAASMNDTANFRRVFGNLYAGFHANPGILTG
SAIGCDPDIFWSQLYASMEKHLLVFDYTNYDGSLHPVWFQALEQLLNNLGFPGELAYKLCNTTHIYKDEM
YTVKGGMPSGISGTSIFNTIINNIIIRTLVLDTYKGIELDKLKIVAYGDDVIASYPEELDPAQIAVSGLK
YGLTITPADKSDQFVKVNWDNATFLKRGFRVDERYSFLVHPVFPEKEIFESIRWTRDPKNTQDHVYSLCL
LMWHNGEEPYKEFISKIRKTEVGRRLYLPPYNLLERTWIDKFI

>gi|253722036|pdb|1A3R|P
VKAETRLNPDLQPTEX
