# Supplementary material for: Identification of Influenza A/H7N9 Virus Infection-Related Human Genes Based on Shortest Paths in a Virus-Human Protein Interaction Network
Source: Biomed Res Int. 2014 May 18;2014:239462. doi: 10.1155/2014/239462 (PMC4052153; doi:10.1155/2014/239462)
Supplement: Supplementary file 1 — Supporting Information S1: Sequences of the 11 non-homologous influenza A/H7N9 virus proteins downloaded from NCBI protein database, with pairwise sequence identity less than 40%. Supporting Information S2: The interacting influenza A/H7N9 virus-human protein pairs with their sharing GO terms. The interacting HRV-human and RSV-human protein pairs were also included respectively. Supporting Information S3: The 3,212 Target Human Proteins interacted with influenza A/H7N9 virus proteins, found based on sharing GO terms. The Target Human Proteins interacted with HRV and RSV viruses were also included respectively. Supporting Information S4: The 962 shortest path human proteins picked out on shortest paths for influenza A/H7N9 virus. The shortest path human proteins for HRV and RSV viruses were also included respectively. Supporting Information S5: Sequences of the 4 non-homologous Human Rhinovirus (HRV) proteins downloaded from NCBI protein database, with pairwise sequence identity less than 40%. Supporting Information S6: Sequences of the 22 non-homologous Respiratory Syncytical Virus (RSV) proteins downloaded from NCBI protein database, with pairwise sequence identity less than 40%. [file 239462.f1.zip › Supporting Information/Supporting Information S6.fasta]

>gi|61216|emb|CAA24906.1|
MALSKVKLNDTLNKDQLLSSSKYTIQRSTGDSIDTPNYDVQKHINKLCGMLLITEDANHKFTGLIGMLYA
MSRLGREDTIKILRDAGYHVKANGVDVTTHRQDINGKEMKFEVLTLASLTTEIQINIEIESRKSYKKMLK
EMGEVAPEYRHDSPDCGMIILCIAALVITKLAAGDRSGLTAVIRRANNVLKNEMKRYKGLLPKDIANSFY
EVFEKHPHFIDVFVHFGIAQSSTRGGSRVEGIFAGLFMNAYGAGQVMLRWGVLAKSVKNIMLGHASVQAE
MEQVVEVYEYAQKLGGEAGFYHILNNPKASLLSLTQFPHFSSVVLGNAAGLGIMGEYRGTPRNQDLYDAA
KAYAEQLKENGVINYSVLDLTAEELTLKTTKKDPKPQTTKSKEVPTTKPTEEPTINTTKTNIITTLLTSN
TTGNPELTSQMETFHSTSSEGNPSPSQVSTTSEYPSQPSSPPNTPRQ

>gi|133664|sp|P14156.1|PHOSP_HRSV
MEKFAPEFHGEDANNRATKFLESIKGKFTSPKDPKKKDSIISVNSIDIEVTKESPITSNSTIINPTNETD
DTVGNKPNYQRKPLVSFKEDPTPSDNPFSKLYKETIETFDNNEEESSYSYEEINDQTNDNITARLDRIDE
KLSEILGMLHTLVVASAGPTSARDGIRDAMVGLREEMIEKIRTEALMTNDRLEAMARLRNEESEKMAKDT
SDEVSLNPTSEKLNNLLEGNDSDNDLSLEDF

>gi|222560|dbj|BAA00635.1|
MGCNSLSMIKVRLQNLFDNDEVALLKITCYTDKLILLTNALAKAVIHTIKLNGIVFIHVITSSEVCPDNN
IVVKSNFTTMPILQNGGYIWELIELTHCSQSNGLMVDNCEIKFSKRLSDSVMTNYMNQISDLLGLDLNS

>gi|222561|dbj|BAA00636.1|
MSTTNDNTTMQRLMITDMRPLSMESIITSLTKEIITHKFIYLINNECIVRKLDERQATFTFLVNYEMKLL
HKVGSTIYKKYTEYNTKYGTFPMPIFINHDGFLECIGIKPTKHTPIIYKYDLNP

>gi|222567|dbj|BAA00849.1|
MGNTSITIEFTSKFWPYFTLIHMILTPISLLIIITIMIAILNKLSEHKTFCNKTLELGQMYQINT

>gi|228251|prf||1801323A
MSRRNPCKFEIRGHCLNGRRCHYSHNYFEWPPHALLVRQNFMLNKILKSMDKSIDTLSEISGAAELDRTE
EYALGIVGVLESYIGSINNITKQSACVAMSKLLIEINSDDIKKLRDNEEPNSPKIRVYNTVISYIESNRK
NNKQTIHLLKRLPADVLKKTIKNTLDIHKSITISNSKESTVNDQNDQTKNNDITG

>gi|228252|prf||1801323B
MIKMTKPKIMILPDKYPCSISSILISSESMIATFNHKNILQFNHNHLDNHQCLLNHIFDEIHWTPKNLLD
ATQQFLQHLNIPEDIYTVYILVS

>gi|808817|gb|AAB59855.1|
MLPQIGSTQLHDLQSNPWKINLFPLHQCVNSYKLSTYILHFTITITNTLWFNQSNKTYLKSQIIPSHCLS
DLVLK

>gi|808818|gb|AAB59859.1|
MQLPQSSLQSHFVLLLVKTSLKNFINQHAVQLAKAILVL

>gi|961607|gb|AAB38516.1|
MELPILKTNAITTILAAVTLCFASSQNITEEFYQSTCSAVSKGYLSALRTGWYTSVITIELSNIKENKCN
GTDAKVKLIKQELDKYKNAVTELQLLMQSTPAANSRARRELPRFMNYTLNNTKNTNVTLSKKRKRRFLGF
LLGVGSAIASGIAVSKVLHLEGEVNKIKSALLSTNKAVVSLSNGVSVLTSKVLDLKNYIDKQLLPIVNKQ
SCSISNIETVIEFQQKNNRLLEITREFSVNAGVTTPVSTYMLTNSELLSLINDMPITNDQKKLMSNNVQI
VRQQSYSIMSIIKEEVLAYVVQLPLYGVIDTPCWKLHTSPLCTTNTKEGSNICLTSTDRGWYCDNAGSVS
FFPQAETCKVQSNRVFCDTMNSLTLPSEVNLCNVDIFNPKYDCKIMTSKTDVSSSVITSLGAIVSCYGKT
KCTASNKNRGIIKTFSNGCDYVSNKGVDTVSVGNTLYYVNKQEGKSLYVKGEPIINFYDPLVFPSDEFDA
SISQVNEKINQSLAFIRKSDELLHNVNAGKSTTNIMITTIIIVIIVILLLLIAVGLFLYCKARSTPVTLS
KDQLSGIINNIAFSN

>gi|2582033|gb|AAB82439.1|
MDPIINGNSANVYLTDSYLKGVISFSECNALGSYLFNGPYLKNDYTNLISRQSPLLEHMNLKKLTITQSL
ISRYHKGELKLEEPTYFQSLLMTYKSMSSSEQIATTNLLKKIIRRAIEISDVKVYAILNKLGLKEKDRVK
PNNNSGDENSVLTTIIKDDILSAVESNQSYTNSDKNHSVNQNITIKTTLLKKLMCSMQHPPSWLIHWFNL
YTKLNNILTQYRSNEVKSHGFILIDNQTLSGFQFILNQYGCIVYHKGLKKITTTTYNQFLTWKDISLSRL
NVCLITWISNCLNTLNKSLGLRCGFNNVVLSQLFLYGDCILKLFHNEGFYIIKEVEGFIMSLILNITEED
QFRKRFYNSMLNNITDAAIKAQKNLLSRVCHTLLDKTVSDNIINGKWIILLSKFLKLIKLAGDNNLNNLS
ELYFLFRIFGHPMVDERQAMDAVRINCNETKFYLLSSLSTLRGAFIYRIIKGFVNTYNRWPTLRNAIVLP
LRWLNYYKLNTYPSLLEITENDLIILSGLRFYREFHLPKKVDLEMIINDKAISPPKDLIWTSFPRNYMPS
HIQNYIEHEKLKFSESDRSRRVLEYYLRDNKFNECDLYNCVVNQSYLNNSNHVVSLTGKERELSVGRMFA
MQPGMFRQIQILAEKMIAENILQFFPESLTRYGDLELQKILELKAGISNKSNRYNDNYNNYISKCSIITD
LSKFNQAFRYETSCICSDVLDELHGVQSLFSWLHLTIPLVTIICTYRHAPPFIKDHVVNLNEVDEQSGLY
RYHMGGIEGWCQKLWTIEAISLLDLISLKGKFSITALINGDNQSIDISKPVRLIEGQTHAQADYLLALNS
LKLLYKEYAGIGHKLKGTETYISRDMQFMSKTIQHNGVYYPASIKKVLRVGPWINTILDDFKVSLESIGS
LTQELEYRGESLLCSLIFRNIWLYNQIALQLRNHALCNNKLYLDILKVLKHLKTFFNLDSIDMALSLYMN
LPMLFGGGDPNLLYRSFYRRTPDFLTEAIVHSVFVLSYYTGHDLQDKLQDLPDDRLNKFLTCVITFDKNP
NAEFVTLMRDPQALGSERQAKITSEINRLAVTEVLSIAPNKIFSKSAQHYTTTEIDLNDIMQNIEPTYPH
GLRVVYESLPFYKAEKIVNLISGTKSITNILEKTSAIDTTDINRATDMMRKNITLLIRILPLDCNKDKRE
LLSLENLSITELSKYVRERSWSLSNIVGVTSPSIMFTMDIKYTTSTIASGIIIEKYNVNSLTRGERGPTK
PWVGSSTQEKKTMPVYNRQVLTKKQRDQIDLLAKLDWVYASIDNKDEFMEELSTGTLGLSYEKAKKLFPQ
YLSVNYLHRLTVSSRPCEFPASIPAYRTTNYHFDTSPINHVLTEKYGDEDIDIVFQNCISFGLSLMSVVE
QFTNICPNRIILIPKLNEIHLMKPPIFTGDVDIIKLKQVIQKQHMFLPDKISLTQYVELFLSNKALKSGS
NINSNLILVHKMSDYFHNAYILSTNLAGHWILIIQLMKDSKGIFEKDWGEGYITDHMFINLNVFFNAYKT
YLLCFHKGYGKAKLECDMNTSDLLCVLELIDSSYWKSMSKVFLEQKVIKYIVNQDTSLHRIKGCHSFKLW
FLKRLNNAKFTVCPWVVNIDYHPTHMKAILSYIDLVRMGLINVDKLTIKNKNKFNDEFYTSNLFYISYNF
SDNTHLLTKQIRIANSELEDNYNKLYHPTPETLENISLIPVKSNNSNKPKFCISGNTESIMMSTFSNKMH
IKSSTVTTRFNYSKQDLYNLFPNVVIDRIIDHSGNTAKSNQLYITTSHQTSLVRNSASLYCMLPWHHVNR
FNFVFSSTGCKISIEYILKDLKIKDPSCIAFIGEGAGNLLLRTVVELHPDIRYIYRSLKDCNDHSLPIEF
LRLYNGHINIDYGENLTIPATDATNNIHWSYLHIKFAEPISIFVCDAELPVTANWSKIIIEWSKHVRKCK
YCSSVNRCILIAKYHAQDDIDFKLDNITILKTYVCLGSKLKGSEVYLVLTIGPANILPVFDVVQNAKLIF
SRTKNFIMPKKTDKESIDANIKSLIPFLCYPITKKGIKTSLSKLKSVVNGDILSYSIAGRNEVFSNKLIN
HKHMNILKWLDHVLNFRSAELNYNHLYMIESTYPYLSELLNSLTTNELKKLIKITGSVLYNLPNEQ

>gi|46198228|gb|AAS82570.1|
IHFAGPSAKQYQATNQGRNQPSNPQTNQPPRPQTKETHIHQPKRWKKKPPPTQQKNQPSRPQKETPATPD
STVLDTTTSKHTIQRNSLLSPTRENTPNFTQIPTVCEPSTLNFTQKI

>gi|75261258|gb|ABA18588.1|
MELLIHRSSAIFLTLAINALYLTS

>gi|193888276|gb|ACF28503.1|
PLTLLKSHQKGLAHQNNPQPHHQSTQTQPQYHPIQNQKHTIQQHKPKEEPQLQHRTTSQAQNHVQKIHQK
NQKMITILKCSTLFPVVYV

>gi|225867480|gb|ACO34848.1|
QLCTLQHMQQHSTLLGHLQKNTKQKTWKENHHQAHGKTNHKDNQKRSQTSNYKTKGSTYPQAHRKANHQH
HLTKHQNSTAHQQFHRESGTHKSRGNPPFNLLRRQYKPFTNLYNIRVPITTSISIQHNRPVVIKKRIIKK
P

>gi|225867484|gb|ACO34850.1|
YPAEYAATIQLSGPCAKEYQAKNREGKPPPSPQKNQPMRTPKKISNLTTQNQREALPPSPQKSQPSTSPN
QIRELHCSPTVPQEFWNTPVKRKPSIQPPPKAIQALHKSIQHPSTYNNLHLHPT

>gi|225867514|gb|ACO34865.1|
NLEAPLFRAQTKRGAPPLTQITRASXKPRPKNPPKKPKGGYHFEVFNFVPCSICGNNQLCKSICKTIPSN
KPKEKPPLKPTNNPPPKTPNKRGPKTLAKTLKKETPPNLTKKPTPKTTERDPSPPQSTVLDTATSGHTIQ
QQSLHSTTPKNTPNSTQTPTASEPSTSNSTQEF

>gi|335892199|pdb|2YKD|A
EMETYVNKLHEGSTYTAAVQYNVLEKDDDPASLTIWVPMFQSSMPADLLIKELANVNILVKQISTPKGPS
LRVMINSRSAVLAQMPSKFTICANVSLDDRSKLAYDVTTPCEIKACSLTCLKSKNMLTTVKDLTMKTLNP
THDIIALCEFENIVTSKKVIIPTYLRSISVRNKDLNTLENITTTEFKNAITNAKIIPYSGLLLVITVTDN
KGAFKYIKPQSQFIVDLGAYLEKESIYYVTTNWKHTATRFAIKPMED

>gi|353441626|gb|AEQ98758.1|
MSKTKDQRTAKTLERTWDTLNHLLFISSCLYKLNLKSIAQITLSILAMIISTSLIIAAIIFIASANHKVT
LTTAIIQDATNQIKNTTPTYLTQNPQLGISFSNLSGTTSQSTTILASTTPSAESTPQSTTVKIKNTTTTQ
ILPSKPTTKQRQNKPQNKPNNDFHFEVFNFVPCSICSNNPTCWAICKRIPNKKPGKKTTTKPTKKPTLKT
TKKDPKPQTTKPKEVLTTKPTGKPTINTTKTNIRTTLLTSNTKGNPEHTSQEETLHSTTSEGYLSPSQVY
TTSGQEETLHSTTSEGYLSPSQVYTTSEYLSQSLSSSNTTK

>gi|196167459|gb|ACG71050.1|
KETQKHQPKHRKKKPPSTQQKNQPPRPQKETPAPHNPPCSTQPHQNTQKETPAPHNPLRLTQPHQNTQSN
SNPSTQPPPKTHPTPHKHPQHPSPPHQIPPKNSSHMLSYLKTTS

>gi|196167515|gb|ACG71078.1|
KKPKNTSQNTEKRNHHQPNKKTNPQDHKKRHQHPTIHCARHNYIKTHRKRHQHLTIHCARHNHIKTHNPT
AIPLLNHPRKHTQLHTNTHSIRALHIKFHLKTLVICLVIQKLHLSREP

>gi|306438613|emb|CBW45347.1|
IFIISANHKVTLTTVTVQTIKNHTEKNITTYLTQVSPERVSPSKQPTTTPPIHTNSATISPNTKSETHHT
TAQTKGRTSTPTQNNKPSTKPRPKNPPKKDDYH
